# Supplementary material for: Novel Quantitative Trait Loci for Grain Cadmium Content Identified in Hard White Spring Wheat
Source: Front Plant Sci. 2021 Dec 2;12:756741. doi: 10.3389/fpls.2021.756741 (PMC8678907; doi:10.3389/fpls.2021.756741)
Supplement: Supplementary file 2 [file Data_Sheet_2.xlsx]

## Sheet: Appendix A
Appendix A: Genotypic data and genetic map of the DH population
IWB_name	LGroup	chr	cM_Kosambi	29001	29002	29003	29004	29005	29006	29007	29009	29010	29011	29012	29013	29014	29015	29016	29017	29018	29019	29020	29021	29022	29023	29024	29025	29026	29027	29028	29029	29030	29031	29032	29033	29034	29035	29036	29037	29038	29039	29040	29041	29042	29043	29044	29045	29046	29047
IWB11266	1	2Dx	0	0	0	2	2	2	2	0	2	2	2	0	0	2	2	0	0	2	2	2	0	2	0	2	2	0	2	2	0	2	0	2	0	2	0	2	0	2	2	0	2	0	2	0	2	0	2
IWB62249	1	2Dx	0.56	0	0	2	2	2	2	0	2	2	2	0	0	2	2	0	0	2	2	2	0	2	0	2	2	0	2	2	0	2	0	2	0	2	0	2	0	2	2	0	2	0	2	0	2	0	2
IWB9163	1	2Dx	1.12	0	0	2	2	2	2	0	2	2	2	0	0	2	2	0	0	2	2	0	0	2	0	2	2	0	2	2	0	2	0	2	0	2	0	2	0	2	2	0	2	0	2	0	2	0	2
IWB29319	1	2B	2.22	0	0	2	2	2	2	0	2	2	2	0	0	2	2	0	0	2	2	2	0	2	0	2	2	0	2	2	0	2	0	2	0	2	0	2	0	2	2	0	2	0	2	0	2	0	2
IWB80484	1	2Dx	3.33	0	0	2	2	2	2	0	2	2	2	0	0	2	2	0	0	2	2	2	0	2	0	2	2	0	2	2	0	2	0	2	0	2	0	2	2	2	2	0	2	0	2	0	2	0	2
IWB78851	1	2Dx	22.44	0	0	2	2	2	2	0	2	2	2	0	2	2	2	2	0	2	0	2	0	2	2	0	2	0	2	0	0	0	0	2	0	2	0	2	2	2	2	0	2	2	2	0	2	2	2
IWB53594	1	2Dx	27.43	0	0	2	2	2	2	0	0	2	2	0	2	0	2	2	0	2	0	2	0	2	2	0	0	0	2	0	0	0	0	0	0	2	0	2	2	2	2	0	2	2	2	2	0	2	2
IWB39211	1	2Dx	39.83	0	0	2	2	2	2	0	2	2	2	0	2	2	2	2	0	2	0	2	0	2	2	0	2	0	2	0	0	0	0	0	2	2	0	2	2	2	2	0	2	2	2	2	2	2	2
IWB64250	1	NA	40.42	0	0	2	2	2	-	0	2	2	2	0	2	2	2	2	0	2	0	2	0	2	2	0	2	0	2	0	0	0	0	0	2	2	0	2	2	2	2	0	2	2	2	2	2	2	2
IWB56369	1	NA	40.42	0	-	2	2	2	2	0	2	2	2	0	2	2	2	2	0	2	0	2	0	2	2	0	2	0	2	0	0	0	0	0	2	2	0	2	2	2	2	0	2	2	2	2	2	2	2
IWB12307	1	2Dx	40.99	0	0	2	2	2	2	0	2	2	2	0	2	2	2	2	0	2	0	2	0	2	2	0	2	0	2	0	0	0	0	0	2	2	0	2	2	2	2	0	2	2	2	2	2	2	2
IWB21362	1	2Dx	42.1	0	0	2	2	2	2	0	2	2	2	0	2	2	2	2	0	2	0	2	0	2	2	0	2	0	2	0	0	0	0	0	2	2	0	2	2	2	2	0	2	2	2	2	2	2	2
IWB59335	1	2A	42.65	0	0	2	2	2	2	0	2	2	2	0	2	2	2	2	0	2	0	2	0	2	2	0	2	0	2	0	0	0	0	0	2	2	0	2	2	2	2	0	2	2	2	2	2	2	2
IWB81294	1	1A	43.75	0	0	2	2	2	2	0	2	2	2	0	2	2	2	2	0	2	0	0	0	2	2	0	2	0	2	0	0	0	0	0	2	2	0	2	2	2	2	0	2	2	2	2	2	2	2
IWB10257	1	2Dx	54.99	0	0	2	2	2	2	0	2	2	2	0	2	2	2	2	0	2	0	2	0	2	2	2	2	0	2	0	0	0	0	2	2	0	0	2	2	2	2	0	2	2	2	2	2	2	2
IWB23009	1	NA	54.99	0	0	2	2	2	2	0	2	2	2	0	2	2	2	2	0	2	0	2	0	2	2	2	2	0	2	0	0	0	0	2	-	0	0	2	2	-	2	0	-	2	2	2	2	-	2
IWB43632	1	2Dx	55.57	0	0	2	2	2	2	0	2	2	2	0	2	2	2	2	0	2	0	2	0	2	2	2	2	0	2	0	0	0	0	2	2	0	0	2	2	2	2	0	2	2	2	2	2	2	2
IWB38831	1	4D	56.12	0	0	2	2	2	2	0	2	2	2	0	2	2	2	2	0	2	0	2	0	2	2	2	2	0	2	0	0	0	0	2	2	0	0	2	2	2	2	0	2	2	2	2	2	2	2
IWB24265	1	NA	56.69	0	0	2	2	2	2	0	2	2	2	0	2	2	2	2	0	2	0	2	0	2	2	2	2	0	2	0	0	0	0	2	2	0	0	-	2	2	2	0	2	2	2	2	2	2	2
IWB12136	1	2Dx	56.69	0	0	2	2	2	2	0	2	2	2	0	2	2	2	2	0	2	0	2	0	2	2	2	2	0	2	0	0	0	0	2	2	0	0	2	2	2	2	0	2	2	2	2	2	2	2
IWB48312	1	2Dx	57.79	2	2	2	2	2	2	0	2	2	2	0	2	2	2	2	0	2	0	2	0	2	2	2	2	0	2	0	0	0	0	2	2	0	0	2	2	2	2	0	2	2	2	2	2	2	2
IWB73798	1	2Dx	68.45	0	2	2	2	2	2	0	2	2	2	0	2	2	2	2	0	2	2	2	0	2	2	2	2	0	2	0	0	0	2	2	2	0	0	2	2	2	2	0	2	2	2	2	2	2	0
IWB73790	1	2Dx	69	0	0	2	2	2	2	0	2	2	2	0	2	2	2	2	0	2	2	2	0	2	2	2	2	0	2	0	0	0	2	2	2	0	0	2	2	2	2	0	2	2	2	2	2	2	0
IWB32142	1	2Dx	69	0	0	2	2	2	2	0	2	2	2	0	2	2	2	2	0	2	2	2	0	2	2	2	2	0	2	0	0	0	2	2	2	0	0	2	2	2	2	0	2	2	2	2	2	2	0
IWB35758	1	2Dx	69	0	0	2	2	2	2	0	2	2	2	0	2	2	2	2	0	2	2	2	0	2	2	2	2	0	2	0	0	0	2	2	2	0	0	2	2	2	2	0	2	2	2	2	2	2	0
IWB12130	1	2Dx	70.11	0	0	2	2	2	2	0	2	2	2	0	2	2	2	2	0	2	2	2	0	2	2	2	2	0	2	0	0	0	2	2	2	0	0	2	2	2	2	0	2	2	2	2	2	2	0
IWB75715	1	2Dx	70.67	0	0	2	2	2	2	0	2	2	2	0	2	2	2	2	0	2	2	2	0	2	2	2	2	0	2	0	0	0	2	2	2	0	0	2	2	2	2	0	2	2	2	2	2	2	0
IWB32181	1	2Dx	71.22	0	0	2	2	2	2	0	2	2	2	0	2	2	2	2	0	2	2	2	0	2	2	2	2	0	2	0	2	0	2	2	2	0	0	2	2	2	2	0	2	2	2	2	2	2	0
IWB44325	1	2Dx	72.33	0	0	2	2	2	2	0	2	2	2	0	2	2	2	2	0	2	2	2	0	2	2	2	2	0	2	0	2	0	2	2	2	0	0	2	2	2	2	0	2	2	2	2	2	2	0
IWB12034	1	2Dx	73.43	0	0	2	2	2	2	0	2	2	2	0	2	2	2	2	0	2	2	2	0	2	2	2	2	0	2	0	2	0	2	2	2	0	0	2	2	2	2	0	2	2	2	2	2	2	0
IWB13647	1	2Dx	73.99	0	0	2	2	2	2	0	2	2	2	0	2	2	2	2	0	2	2	2	0	2	2	2	2	0	2	0	2	0	2	2	2	0	0	2	2	2	2	0	2	2	2	2	2	2	0
IWB46025	1	2Dx	79.66	0	0	2	2	2	0	0	2	2	2	0	2	2	2	2	0	2	2	2	0	2	2	2	2	0	2	0	2	0	2	2	2	0	0	2	2	2	2	0	0	2	2	2	2	2	0
IWB42141	1	2Dx	82.49	0	0	0	2	2	0	0	2	2	2	0	2	2	2	2	0	2	2	2	0	2	2	2	2	0	2	0	2	0	2	2	2	0	0	2	2	2	2	0	0	2	2	2	2	2	0
IWB44772	1	2Dx	107.78	2	0	2	2	2	0	2	2	2	2	0	2	2	2	2	0	2	2	2	0	2	2	2	2	0	2	0	2	0	2	2	2	2	0	2	2	2	2	2	2	2	2	2	2	2	2
IWB24239	1	6B	125.63	2	0	0	2	2	0	2	0	2	2	2	2	0	2	0	2	2	2	2	2	2	2	0	0	2	2	0	2	0	2	2	2	2	0	2	2	2	2	2	2	2	2	0	0	2	2
IWB11313	1	2Dx	156.72	2	2	2	2	2	2	0	2	2	2	2	2	2	2	2	0	2	2	2	0	2	2	2	2	0	2	2	2	2	2	2	2	0	2	2	2	2	2	2	2	2	2	2	2	2	0
IWB9546	1	NA	178.04	2	2	2	2	2	2	2	2	2	2	2	2	2	2	2	0	2	2	2	0	2	2	2	2	0	2	0	0	2	2	2	2	2	2	2	2	2	2	2	2	2	2	2	2	2	0
IWB32483	1	2Dx	195.47	2	2	2	2	2	2	0	2	2	2	0	2	2	2	2	2	2	2	2	0	2	2	2	2	0	2	0	2	2	0	2	2	2	2	2	2	2	2	2	2	2	2	2	2	2	2
IWB75923	1	2Dx	203.84	2	2	2	2	2	2	2	2	2	2	2	2	2	2	2	2	2	2	2	0	2	2	0	2	0	2	0	2	2	0	2	2	2	2	2	2	2	2	2	2	2	2	2	2	2	2
IWB6886	1	5B	238.49	2	2	2	2	0	2	2	2	0	2	2	2	2	2	2	2	2	2	2	0	2	0	0	2	0	2	0	2	2	2	2	2	2	2	2	0	2	0	2	2	2	2	2	2	2	0
IWB70483	2	3A	0	0	2	2	0	2	2	2	2	2	0	0	0	2	2	2	0	0	2	2	0	2	0	0	2	0	2	2	2	2	2	2	2	2	2	2	0	2	2	0	0	0	2	2	2	0	0
IWB44003	2	NA	0.55	0	2	2	0	2	2	2	2	2	0	0	0	2	2	2	0	0	2	2	0	2	0	0	2	0	2	2	2	2	2	2	2	2	2	2	0	2	2	0	0	0	2	2	2	0	0
IWB12788	2	3A	1.66	0	2	2	0	2	2	2	2	2	0	0	0	2	2	2	0	0	2	2	0	2	0	0	2	0	2	2	2	2	2	2	2	2	2	2	0	2	2	0	0	0	2	2	2	0	0
IWB14695	2	3A	1.66	0	2	2	0	2	2	2	2	2	0	0	0	2	2	2	0	0	2	2	0	2	0	0	2	0	2	2	2	2	2	2	2	2	2	2	0	2	2	0	0	0	2	2	2	0	0
IWB32648	2	NA	2.77	0	2	2	0	2	2	2	2	2	0	0	0	2	2	2	0	0	2	2	0	2	0	0	2	0	2	2	2	2	2	2	2	2	2	2	0	2	2	0	0	0	2	2	2	0	0
IWB69546	2	NA	4.98	0	2	2	2	2	2	2	2	2	0	0	0	2	2	2	0	0	2	2	0	2	0	0	2	0	2	2	2	2	0	2	2	2	2	2	0	2	2	0	0	0	2	2	2	0	0
IWB75392	2	3A	5.53	0	2	2	2	2	2	2	2	2	0	0	0	2	2	2	0	0	2	2	0	2	0	0	2	0	2	2	2	2	0	2	2	2	2	2	0	2	2	0	0	0	2	2	2	0	0
IWB61868	2	3A	6.64	0	2	2	2	2	2	2	2	2	0	0	0	2	2	2	0	0	2	2	0	2	0	0	2	0	2	2	2	2	0	2	2	2	2	2	0	2	2	0	0	0	2	2	2	0	0
IWB12103	2	NA	7.75	0	2	2	2	2	2	2	2	2	2	0	0	2	2	2	0	0	2	2	0	2	0	0	2	0	2	2	2	2	0	2	2	2	2	2	0	2	2	0	0	0	2	2	2	0	0
IWB12017	2	3A	8.86	0	2	2	2	2	2	2	2	2	2	0	0	2	2	2	0	0	2	2	0	2	0	0	2	0	2	2	2	2	0	2	2	2	2	2	0	2	2	0	0	0	0	2	2	0	0
IWB66063	2	3D	8.86	0	2	2	2	2	2	2	2	2	2	0	0	2	2	2	0	0	2	2	0	2	0	0	2	0	2	2	2	2	0	2	2	2	2	2	0	2	2	0	0	0	0	2	2	0	0
IWB37803	2	NA	11.63	0	2	2	2	2	2	2	2	2	2	0	0	2	2	2	0	0	2	2	0	2	2	0	2	0	2	2	2	2	0	2	2	2	2	2	0	2	2	0	0	0	0	2	2	0	0
IWB11	2	NA	12.18	0	2	2	2	2	2	2	2	2	2	0	0	2	2	2	0	0	2	2	0	2	2	0	2	0	2	2	2	2	0	2	2	2	2	2	0	2	2	0	0	0	0	2	2	0	0
IWB11432	2	NA	13.29	0	2	2	2	2	2	2	2	2	2	0	0	2	2	2	0	0	2	2	0	2	2	0	2	0	2	2	2	2	0	2	2	2	2	2	0	2	2	0	0	0	0	2	2	0	0
IWB11436	2	3A	14.4	0	2	2	2	2	2	2	2	2	2	2	0	2	2	2	0	0	2	2	0	2	2	0	2	0	2	2	2	2	0	2	2	2	2	2	0	2	2	0	0	0	0	2	2	0	0
IWB10770	2	3A	14.4	0	2	2	2	2	2	2	2	2	2	2	0	2	2	2	0	0	2	2	0	2	2	0	2	0	2	2	2	2	0	2	2	2	2	2	0	2	2	0	0	0	0	2	2	0	0
IWB73075	2	6A	14.95	0	2	2	2	2	2	2	2	2	2	2	0	2	2	2	0	0	2	2	0	2	2	0	2	0	2	2	2	2	0	2	2	2	2	2	0	2	2	0	0	0	0	2	2	0	0
IWB69564	2	NA	15.51	0	2	2	2	2	2	2	2	2	2	2	0	2	2	2	0	0	2	2	0	2	2	0	2	0	2	2	2	2	0	2	2	2	2	2	0	2	2	0	0	0	0	2	2	0	0
IWB153	2	3A	17.16	0	2	2	2	2	2	2	2	2	2	2	0	2	2	2	0	0	2	2	2	2	2	0	2	2	2	2	2	2	0	2	2	2	2	2	0	2	2	0	0	0	0	2	2	0	0
IWB81224	2	3A	17.72	0	2	2	2	2	2	2	2	2	2	2	0	2	2	2	0	0	2	2	2	2	2	0	2	2	2	2	2	2	0	2	2	2	2	2	0	2	2	0	0	0	0	2	2	0	0
IWB32493	2	3A	18.82	0	2	2	2	2	2	2	2	2	2	2	0	2	2	2	0	0	2	2	2	2	2	0	2	2	2	2	2	2	0	2	2	2	2	2	0	0	2	0	0	0	0	2	2	0	0
IWB33721	2	NA	19.39	0	2	2	2	2	2	2	2	2	2	2	0	2	2	2	0	0	2	2	2	2	2	0	2	2	2	2	2	2	0	2	2	2	2	2	0	0	2	0	0	0	0	2	2	0	0
IWB54971	3	6A	0	0	2	0	2	2	0	2	0	2	2	0	0	0	0	0	0	0	2	0	0	0	2	0	0	0	0	0	2	0	2	2	2	2	2	0	2	2	0	0	0	0	0	2	0	2	0
IWB6465	3	6A	1.11	0	2	0	2	2	0	2	0	2	2	0	0	0	0	0	0	0	2	2	0	0	2	0	0	0	0	0	2	0	2	2	2	2	2	0	2	2	0	0	0	0	0	2	0	2	0
IWB28198	3	6A	2.21	0	2	0	2	2	0	2	0	2	2	0	0	0	0	0	0	0	2	0	0	0	2	0	0	0	0	0	2	0	2	2	2	2	2	0	2	2	0	0	0	0	0	2	0	2	0
IWB10227	3	6A	2.76	0	2	0	2	2	0	2	0	2	2	0	0	0	0	0	0	0	2	0	0	0	2	0	0	0	0	0	2	0	2	2	2	2	2	0	2	2	0	0	0	0	0	2	0	2	0
IWB56945	3	6A	3.32	0	2	0	2	2	0	2	0	2	2	0	0	0	0	0	0	0	2	0	0	0	2	0	0	0	0	0	2	0	2	2	2	2	2	0	2	2	0	0	0	0	0	2	0	2	0
IWB34830	3	6A	4.42	0	2	0	2	2	0	2	0	2	2	0	0	0	0	0	0	0	2	0	0	0	2	0	0	0	0	0	2	0	2	2	2	2	2	0	2	2	0	0	0	0	0	2	0	2	0
IWB3945	3	6A	6.08	0	2	0	2	2	0	2	0	2	2	0	0	0	0	0	0	0	2	0	0	0	2	0	0	0	0	0	2	0	2	2	2	2	2	0	2	2	0	0	0	0	0	2	0	2	0
IWB39323	3	6A	6.63	0	2	0	2	2	0	2	0	2	2	0	0	0	0	0	0	0	2	0	0	0	2	0	0	0	0	0	2	0	2	2	2	2	2	0	2	2	0	0	0	0	0	2	0	2	0
IWB12439	3	6A	8.84	0	2	0	2	2	0	2	0	2	2	0	0	0	0	0	0	0	2	0	0	0	2	0	0	0	0	0	2	0	2	2	2	2	2	0	2	2	0	0	0	0	0	2	0	2	0
IWB7500	3	6A	9.39	0	2	0	2	2	0	2	0	2	2	0	0	0	0	0	0	0	2	0	0	0	2	0	0	0	0	0	2	0	2	2	2	2	2	0	2	0	0	0	0	0	0	2	0	2	0
IWB29577	3	6A	9.95	0	2	0	2	2	2	2	0	2	2	0	0	0	0	0	0	0	2	0	0	0	2	0	0	0	0	0	2	0	2	2	2	2	2	0	2	0	0	0	0	0	0	2	0	2	0
IWB34957	3	6A	10.5	0	2	0	2	2	2	2	0	2	2	0	0	0	0	0	0	0	2	0	0	0	2	0	0	0	0	0	2	0	2	2	2	2	2	0	2	0	0	0	0	0	2	2	0	2	0
IWB13025	3	6A	11.05	0	2	0	2	2	2	2	0	2	2	0	0	0	0	0	0	0	2	0	0	0	2	0	0	0	0	0	2	0	2	2	2	2	2	0	2	0	0	0	0	0	2	2	0	2	0
IWB9036	3	6A	12.16	0	2	0	2	2	2	2	0	2	0	0	0	0	0	0	0	0	2	0	0	0	2	0	0	0	0	0	2	0	2	2	2	2	2	0	2	2	0	0	0	0	2	2	0	2	0
IWB10644	3	6A	13.82	0	2	0	2	2	2	2	0	2	0	0	0	0	0	0	0	0	2	0	0	0	2	0	0	0	0	0	2	0	2	2	2	2	2	0	2	0	0	0	0	0	2	2	0	2	0
IWB11102	3	6A	14.37	0	2	0	2	2	2	2	0	2	0	0	0	0	0	0	0	0	2	0	0	0	2	0	0	0	0	0	2	0	2	2	2	2	2	0	2	0	0	0	0	0	2	2	0	2	0
IWB63176	3	6A	14.92	0	2	0	2	2	2	2	0	2	0	0	0	0	0	0	0	0	2	0	0	0	2	0	0	0	0	0	2	0	2	2	2	2	2	0	2	0	0	0	0	0	2	2	0	2	0
IWB12868	3	6A	17.13	0	2	0	2	2	2	2	2	2	0	0	0	2	0	0	0	0	2	0	0	0	2	0	2	0	0	0	2	0	2	2	2	2	2	0	2	0	0	0	0	0	2	2	2	2	0
IWB1442	3	6A	19.34	0	2	0	2	2	2	2	2	0	0	0	0	2	0	0	0	0	2	0	0	0	2	0	2	0	0	0	2	0	2	2	2	2	2	0	2	0	0	0	0	0	2	2	2	2	0
IWB34488	3	6A	19.9	0	2	0	2	2	2	2	2	0	0	0	0	2	0	0	0	0	2	0	0	0	2	0	2	0	0	0	2	0	2	2	2	2	2	0	2	0	0	0	0	0	2	2	2	2	0
IWB48922	3	6A	21	0	2	0	2	2	2	2	2	0	0	0	0	2	0	0	0	0	2	0	0	0	0	0	2	0	0	0	2	0	2	2	2	2	2	0	2	0	0	0	0	0	2	2	2	2	0
IWB68246	3	6A	22.11	0	2	0	2	2	2	2	2	0	0	0	0	2	0	0	0	0	2	0	0	0	0	0	2	0	0	0	2	0	2	2	2	2	2	0	2	0	0	0	0	0	2	2	2	2	0
IWB76736	3	6A	23.76	0	2	0	2	2	2	2	2	0	0	0	0	2	0	0	0	0	2	0	0	0	0	0	2	0	0	0	2	0	2	2	2	2	2	0	2	0	0	0	0	0	2	2	2	2	0
IWB38557	3	6A	25.42	0	2	0	2	2	2	2	2	0	0	0	0	2	0	0	0	0	2	0	0	0	0	0	2	0	0	0	2	0	2	2	2	2	2	0	2	0	0	0	0	0	2	2	2	2	0
IWB45486	3	NA	29.3	0	2	0	2	2	2	2	2	0	0	0	0	2	0	0	0	0	2	0	0	0	0	0	2	0	0	0	2	0	2	2	2	2	2	0	2	0	0	0	0	0	2	0	2	2	0
IWB10321	3	6A	32.62	0	2	0	2	2	2	2	2	0	0	0	0	2	0	0	0	0	2	0	0	0	0	0	2	0	0	0	2	0	2	2	2	2	2	0	2	0	0	0	0	0	2	2	2	2	0
IWB79528	3	6A	32.62	0	2	0	2	2	2	2	2	0	0	0	0	2	0	0	0	0	2	0	0	0	0	0	2	0	0	0	2	0	2	2	2	2	2	0	2	0	0	0	0	0	2	2	2	2	0
IWB35333	3	6A	33.17	0	2	0	2	2	2	2	2	0	0	0	0	2	0	0	0	0	2	0	0	0	0	0	2	0	0	0	2	0	2	2	0	2	2	0	2	0	0	0	0	0	2	2	2	2	0
IWB10738	3	6A	34.83	0	2	0	2	2	2	2	2	0	0	0	0	2	0	0	0	0	2	0	0	0	0	0	2	0	0	0	2	0	2	2	2	2	2	0	2	0	0	0	0	0	2	2	2	2	0
IWB1754	3	6A	37.6	0	2	0	2	2	2	2	2	0	2	0	0	2	0	0	0	0	2	0	0	0	2	0	2	0	0	0	2	0	2	2	2	2	2	0	2	0	0	0	0	0	2	2	2	2	0
IWB11269	3	6A	41.47	0	2	0	2	2	2	2	2	0	2	0	0	2	0	0	0	0	2	0	0	0	2	0	2	0	0	0	2	0	2	2	2	2	2	0	2	0	0	0	0	0	2	2	2	2	0
IWB40855	3	NA	42.58	0	2	0	2	2	2	2	2	0	2	0	0	2	0	0	0	0	2	0	0	0	2	0	2	0	0	0	0	0	2	2	2	2	2	0	2	0	0	0	0	0	2	2	2	2	0
IWB60591	3	6A	43.69	0	2	0	2	2	2	2	2	0	2	0	0	2	0	0	0	0	2	0	0	0	2	0	2	0	0	0	0	0	2	2	2	2	2	0	2	0	0	0	0	0	2	2	2	2	0
IWB45465	3	6A	44.81	0	2	0	2	2	2	2	2	0	2	0	0	2	0	0	0	0	2	0	0	0	2	0	2	0	0	0	0	0	2	2	2	2	2	0	2	0	0	0	0	0	2	2	2	2	0
IWB2006	3	6A	49.8	0	2	0	2	2	2	2	2	0	2	0	0	2	0	0	0	0	2	0	0	0	2	0	2	0	0	0	0	0	2	2	2	2	2	0	2	0	0	0	0	0	2	2	2	2	0
IWB34744	3	6A	55.35	0	2	0	2	2	2	0	2	0	2	0	0	2	0	0	0	0	2	0	0	0	2	2	2	0	0	0	0	0	2	2	2	2	2	0	2	0	0	0	0	0	2	0	2	2	0
IWB67847	3	NA	74.46	0	2	2	2	2	2	0	2	0	2	0	0	2	0	0	2	0	0	0	0	0	0	2	2	0	0	0	0	0	2	2	2	2	2	0	2	2	0	0	0	0	2	0	2	2	0
IWB12055	3	6A	75.01	0	2	2	2	2	2	0	2	0	2	0	0	2	0	0	2	0	0	0	0	2	0	2	2	0	0	0	0	0	2	2	2	2	2	0	2	2	0	0	0	0	2	0	2	2	0
IWB49974	3	6A	75.56	0	2	2	2	2	2	0	2	0	2	0	0	2	0	0	2	0	0	0	0	2	0	2	2	0	0	0	0	0	2	2	2	2	2	0	2	2	0	0	0	0	2	0	2	2	0
IWB71246	3	NA	76.67	0	2	2	2	2	2	0	2	0	2	0	0	2	0	0	2	0	0	0	0	2	0	2	2	0	0	0	0	0	2	2	2	2	2	0	2	2	0	0	0	0	2	0	2	2	0
IWB12203	3	6A	77.22	0	2	2	2	2	2	0	2	0	2	0	0	2	0	0	2	0	0	0	0	2	0	2	2	0	0	0	0	0	2	2	2	2	2	0	2	2	0	0	0	0	2	0	2	2	0
IWB77245	3	6A	77.77	0	2	2	2	2	2	0	2	0	2	0	0	2	0	0	2	0	0	0	0	2	0	2	2	0	0	0	0	0	2	2	2	2	2	0	2	2	0	0	0	0	2	0	2	2	0
IWB2064	3	6A	78.33	0	2	2	2	2	2	0	2	0	2	0	0	2	0	0	2	0	0	0	0	2	0	2	2	0	0	0	0	0	2	2	2	2	2	0	2	2	0	0	0	0	2	0	2	2	2
IWB29501	3	6A	82.2	0	2	2	2	2	2	0	2	0	2	0	0	2	0	0	2	0	0	0	0	2	0	2	2	0	0	0	0	0	2	2	0	2	2	0	2	2	0	0	0	0	2	0	2	0	2
IWB26455	3	NA	84.41	0	2	2	2	2	2	0	2	0	2	0	0	2	0	0	2	0	0	0	0	2	0	2	2	0	0	0	0	0	2	2	0	2	2	0	2	2	0	0	0	0	2	0	2	0	2
IWB33715	3	6D	86.62	0	2	2	2	2	2	0	2	0	2	0	0	2	0	0	2	2	0	0	0	2	0	2	2	0	0	0	0	0	2	2	0	2	2	0	2	2	0	0	0	0	2	0	2	0	2
IWB60316	3	6A	88.28	0	2	2	2	2	2	0	2	0	2	0	0	2	0	0	2	0	0	0	0	2	0	2	2	0	0	0	0	0	2	2	0	2	2	0	2	2	0	0	0	0	2	0	2	0	2
IWB33702	3	NA	89.39	0	2	2	2	2	2	0	2	0	2	0	0	2	0	0	2	0	0	0	0	2	0	2	2	0	0	0	0	0	2	2	0	2	2	0	2	2	0	0	0	0	2	0	2	0	2
IWB10077	3	NA	89.94	0	2	2	2	2	2	0	2	0	2	0	0	2	0	0	2	0	0	0	0	2	0	2	2	0	0	0	0	0	2	2	0	2	2	0	2	2	0	0	0	0	2	0	2	0	2
IWB1727	3	6B	90.49	0	2	2	2	2	2	0	2	0	2	0	0	2	0	0	2	0	0	0	0	2	0	2	2	0	0	0	0	0	2	2	0	2	2	0	2	2	0	0	0	0	2	0	2	0	2
IWB10012	3	6B	91.05	0	2	2	2	2	0	0	2	0	2	0	0	2	0	0	2	0	0	0	0	2	0	2	2	0	0	0	0	0	2	2	0	2	2	0	2	2	0	0	0	0	2	0	2	0	2
IWB35708	3	6B	91.6	0	2	2	2	2	0	0	2	0	2	0	0	2	0	0	2	0	0	0	0	2	0	2	2	0	0	0	0	0	2	2	0	2	2	0	2	2	0	0	0	0	2	0	2	0	2
IWB26937	3	6A	93.26	0	2	2	2	2	0	0	2	0	2	0	0	2	0	0	2	0	0	0	0	2	0	2	2	0	0	0	0	0	2	2	0	2	2	0	2	2	0	0	0	0	2	0	2	0	2
IWB32304	3	6A	94.36	0	2	2	2	2	0	0	2	0	2	0	0	2	0	0	2	0	0	0	0	2	0	2	2	0	0	0	0	0	2	2	0	2	2	0	2	2	0	0	0	0	2	0	2	0	2
IWB11740	3	NA	97.68	0	2	2	2	2	0	0	2	0	2	0	0	2	0	0	2	0	0	0	0	2	0	2	2	0	0	0	0	0	2	2	0	2	2	0	2	2	0	0	0	0	2	0	2	0	2
IWB10015	3	NA	98.23	0	2	2	2	2	0	0	2	0	2	0	0	2	0	0	2	0	0	0	0	2	0	2	2	0	0	0	0	0	2	2	0	2	2	0	2	2	0	0	0	0	2	0	2	0	2
IWB29615	3	NA	100.46	0	2	2	2	2	0	0	2	0	2	0	0	2	0	0	2	0	0	0	0	2	0	2	2	0	0	0	0	0	2	2	0	2	2	0	0	2	0	0	0	0	2	0	2	0	2
IWB23502	3	6B	101.57	0	2	2	2	2	0	0	2	0	2	0	0	2	0	0	2	2	0	2	0	2	0	2	2	0	0	0	0	0	2	2	0	2	2	0	0	2	0	0	0	0	2	0	2	0	2
IWB65267	4	2Dx	0	2	0	2	2	2	2	2	2	0	2	2	0	2	0	2	2	2	2	0	0	2	2	0	2	0	0	0	0	2	0	2	0	2	0	0	0	0	0	2	2	0	0	2	2	2	0
IWB57369	4	2B	3.32	2	0	2	2	2	2	2	2	0	2	2	0	2	0	2	2	2	2	0	0	2	2	0	2	0	0	0	0	2	0	2	0	2	0	0	0	0	0	0	2	0	0	2	2	0	0
IWB41266	4	NA	5.53	2	0	2	2	2	2	2	2	0	2	2	0	2	0	2	2	2	2	0	0	2	2	0	2	0	0	0	0	2	0	2	0	2	0	0	0	0	0	0	2	0	0	2	2	0	0
IWB10434	4	2B	7.74	2	0	2	2	2	2	2	2	0	2	2	0	2	0	2	2	2	2	0	0	2	2	0	2	0	0	0	0	2	0	2	0	2	0	0	0	0	0	2	2	0	0	2	2	2	0
IWB18619	4	2B	9.4	2	0	2	2	2	2	2	2	0	2	2	2	2	0	2	2	2	2	0	0	2	2	0	2	0	0	0	0	2	0	2	0	2	0	0	0	0	0	2	2	0	0	2	2	2	0
IWB30584	4	2B	9.95	2	0	2	2	2	2	2	2	0	2	2	0	2	0	2	2	2	2	0	0	2	2	0	2	0	0	0	0	2	0	2	0	2	0	0	0	0	0	2	2	0	0	2	2	2	0
IWB13299	4	2B	11.61	2	0	2	2	2	2	2	2	0	2	2	0	2	0	2	2	2	2	0	0	2	2	0	2	0	0	0	0	2	0	2	0	2	0	0	0	0	0	2	2	0	0	2	2	2	0
IWB12972	4	2B	14.38	2	0	2	2	2	2	2	2	0	2	2	0	2	0	2	2	2	2	0	0	2	2	0	2	0	0	0	0	2	0	2	0	2	0	0	0	0	0	2	2	0	0	2	2	2	0
IWB21536	4	2B	25.61	2	2	2	2	0	2	2	2	0	2	2	0	2	2	2	2	0	2	0	0	2	2	0	2	0	0	0	2	2	0	2	0	2	2	0	0	2	0	2	2	2	0	2	2	2	0
IWB12436	4	2B	26.74	2	2	2	2	0	2	2	2	0	2	2	0	2	2	2	2	0	2	0	0	2	0	0	2	0	0	0	2	2	0	2	0	2	2	0	0	2	0	2	2	2	0	2	2	2	0
IWB19719	4	2B	28.43	2	2	2	2	0	2	2	2	0	2	2	0	2	2	2	2	0	2	0	0	2	0	0	2	0	0	0	2	2	0	2	0	2	2	0	0	2	0	2	2	2	0	2	2	2	0
IWB29273	4	2B	29.54	2	2	2	2	0	2	2	2	0	2	2	0	2	2	2	2	0	2	0	0	2	0	0	2	0	0	0	2	2	0	2	2	2	2	0	0	2	0	2	0	2	0	2	2	2	0
IWB11939	4	2B	30.09	2	2	2	2	0	2	2	2	0	2	2	0	2	2	2	2	0	2	0	0	2	0	0	2	0	0	0	2	2	0	2	2	2	2	0	0	2	0	2	0	2	0	2	2	2	0
IWB2702	4	2B	36.76	2	2	2	2	0	2	2	2	0	2	2	0	2	2	2	2	0	2	0	2	2	0	0	2	2	0	0	2	2	0	2	2	2	2	0	0	2	0	2	0	2	0	2	2	2	0
IWB76052	4	2B	38.42	2	2	2	2	0	2	2	2	0	2	2	0	2	2	2	2	0	2	0	2	2	0	0	2	2	0	0	2	2	0	2	2	2	2	0	0	2	0	2	0	2	0	2	2	2	0
IWB21742	4	2B	40.65	2	2	2	2	0	2	2	2	0	2	2	2	2	2	2	2	0	2	0	2	2	0	0	2	2	0	0	2	2	0	2	2	2	2	0	0	2	0	2	0	2	0	2	2	2	0
IWB55711	4	NA	45.26	2	2	2	2	0	2	2	2	0	2	2	2	2	-	2	2	0	2	0	2	2	0	0	2	2	0	0	2	2	0	2	2	2	2	0	0	2	0	2	0	2	0	2	2	2	0
IWB7583	4	2B	49.26	2	2	2	2	0	2	2	2	0	2	2	2	2	2	2	2	0	2	0	2	2	0	0	2	2	0	0	2	2	0	2	2	2	2	0	0	2	0	2	0	2	0	2	2	2	0
IWB57468	4	4B	50.37	2	2	2	2	0	2	2	2	0	2	2	2	2	2	2	2	0	2	0	2	2	0	0	2	2	0	0	2	2	0	2	2	2	2	0	0	2	0	2	0	2	0	2	2	2	0
IWB41071	4	NA	52.03	2	2	2	2	0	2	2	2	0	2	2	2	2	2	2	2	0	2	0	2	2	0	0	2	2	0	0	2	2	0	2	2	2	2	0	0	2	0	2	0	2	0	2	2	2	0
IWB13631	4	2B	53.13	2	2	2	2	0	2	2	2	0	2	2	2	2	2	2	2	0	2	0	2	2	0	0	2	2	0	0	2	2	0	2	2	2	2	0	0	2	0	2	0	2	0	2	2	2	0
IWB41315	4	2B	55.34	2	2	0	2	0	2	2	2	0	2	2	2	2	2	2	2	0	2	0	2	2	0	0	2	2	0	0	2	2	0	2	2	2	2	0	0	2	0	2	0	2	0	2	2	2	0
IWB12514	4	2B	57	2	2	0	2	0	2	2	2	0	2	2	2	2	2	2	2	0	2	0	2	2	0	0	2	2	0	0	2	2	0	2	2	2	2	0	0	2	0	2	0	2	0	2	2	2	0
IWB4784	4	NA	57.56	2	2	0	2	0	2	2	2	0	2	2	2	2	2	2	2	0	2	0	2	2	0	0	2	2	0	0	2	2	0	2	2	2	2	0	0	2	0	2	0	2	0	2	2	2	0
IWB22744	4	NA	59.21	2	2	0	2	0	2	2	2	0	2	2	2	2	2	2	2	0	2	0	2	2	0	0	2	2	0	0	2	2	0	2	2	2	2	2	0	2	0	2	0	2	0	2	2	2	0
IWB23709	4	2B	61.44	2	2	0	2	0	2	2	2	0	2	2	2	2	2	2	2	0	2	0	2	2	0	0	2	2	0	0	2	2	0	2	2	2	2	2	0	2	0	2	0	2	0	2	2	2	0
IWB21988	4	2B	63.1	2	2	0	2	0	2	2	2	0	2	2	2	2	2	2	2	0	2	0	2	2	0	0	2	2	0	0	2	2	0	2	2	2	2	2	0	2	0	2	0	2	0	2	2	2	0
IWB12187	4	2B	63.66	2	2	0	2	0	2	2	2	0	2	2	2	2	2	2	2	0	2	0	2	2	0	0	2	2	0	0	2	2	0	2	2	2	2	2	0	2	0	2	0	2	0	2	2	2	0
IWB10440	4	2B	64.76	2	2	0	2	0	2	2	2	0	2	2	2	2	2	2	2	0	2	0	2	2	0	0	2	2	0	0	2	2	0	2	2	2	2	2	0	2	0	2	0	2	0	2	2	2	0
IWB19542	4	2B	65.87	2	2	0	2	0	2	2	2	0	2	2	2	2	2	2	2	0	2	0	2	2	0	0	2	2	0	0	2	2	0	2	2	2	2	2	0	2	0	2	0	2	0	2	2	2	0
IWB4384	4	2B	66.42	2	2	0	2	0	2	2	2	0	2	2	2	2	2	2	2	0	2	0	2	2	0	0	2	2	0	0	2	2	0	2	2	2	2	2	0	2	0	2	0	2	0	2	2	2	0
IWB34350	4	2B	66.98	2	2	0	2	0	2	2	2	0	2	2	2	2	2	2	2	0	2	0	2	2	0	0	2	2	0	0	2	2	0	2	2	2	2	2	0	2	0	2	0	2	0	2	2	2	0
IWB11762	4	2B	66.98	2	2	0	2	0	2	2	2	0	2	2	2	2	2	2	2	0	2	0	2	2	0	0	2	2	0	0	2	2	0	2	2	2	2	2	0	2	0	2	0	2	0	2	2	2	0
IWB9381	4	2B	67.53	2	2	0	2	0	2	2	2	0	2	2	2	2	2	2	2	0	2	0	2	2	0	0	2	2	0	0	2	2	0	2	2	2	2	2	0	2	0	2	0	2	0	2	2	2	0
IWB59913	4	2B	68.63	2	2	0	2	0	2	2	2	0	2	2	2	2	2	2	2	0	2	0	2	2	0	0	2	2	0	0	2	2	0	2	2	2	2	2	0	2	0	2	0	2	0	2	2	2	0
IWB4425	4	2B	70.29	2	2	0	2	0	2	2	2	0	2	2	2	2	2	2	2	0	2	0	2	2	0	0	2	2	0	0	2	2	0	2	2	2	2	2	0	2	0	2	0	2	0	2	2	2	0
IWB10539	4	NA	70.84	2	2	0	2	0	2	2	2	0	2	2	2	2	2	2	2	0	2	0	2	2	0	0	2	2	0	0	2	2	0	2	2	2	2	2	0	2	0	2	0	2	0	2	2	2	0
IWB57573	4	1B	71.41	2	2	0	2	0	2	2	2	0	2	2	2	2	2	2	2	0	2	0	2	2	0	0	2	2	0	0	2	2	0	2	2	2	2	2	0	2	0	2	0	2	0	2	2	2	0
IWB22643	4	NA	72.53	2	2	0	2	0	2	2	2	0	2	2	2	2	2	2	2	0	2	0	2	2	0	0	2	2	0	0	2	2	0	2	2	2	2	2	0	2	0	2	0	2	0	2	2	2	0
IWB43854	4	2B	74.74	2	2	0	2	0	2	2	2	0	2	2	0	2	2	2	2	0	2	2	2	2	0	0	2	2	0	0	2	2	0	2	2	2	2	2	0	2	0	2	0	2	0	2	2	2	0
IWB63406	4	2B	75.85	2	2	0	2	0	2	2	2	0	2	2	2	2	2	2	2	0	2	0	2	2	0	0	2	2	0	0	2	2	0	2	2	2	2	2	0	2	0	2	0	2	0	2	2	2	0
IWB27989	4	2B	76.95	2	2	0	2	0	2	2	2	0	2	2	2	2	2	2	2	0	2	0	2	2	0	0	2	2	0	0	2	2	0	2	2	2	2	2	0	2	0	2	0	2	0	2	2	2	0
IWB40211	4	2B	77.5	2	2	0	2	0	2	2	2	0	2	2	2	2	2	2	2	0	2	0	2	2	0	0	2	2	0	0	2	2	0	2	2	2	2	2	0	2	0	2	0	2	0	2	2	2	0
IWB9833	4	2B	79.16	2	2	0	2	0	2	2	2	0	2	2	2	2	2	2	2	0	2	0	2	2	0	0	2	2	0	0	2	2	0	2	2	2	2	2	0	2	0	2	0	2	0	2	2	2	0
IWB13863	4	NA	79.71	2	2	0	2	0	2	2	2	0	2	2	2	2	2	2	2	0	2	0	2	2	0	0	2	2	0	0	2	2	0	2	2	2	2	2	0	2	0	2	0	2	0	2	2	2	0
IWB11319	4	2B	80.27	2	2	0	2	0	2	2	2	0	2	2	2	2	2	2	2	0	2	0	2	2	0	0	2	2	0	0	2	2	0	2	2	2	2	2	0	2	0	2	0	2	0	2	2	2	0
IWB2143	4	2B	80.82	2	2	0	2	0	2	2	2	0	2	2	2	2	2	2	2	0	2	0	2	2	0	0	2	2	0	0	2	2	0	2	2	2	2	2	0	2	0	2	0	2	0	2	2	2	0
IWB14855	4	2B	81.37	2	2	0	2	0	2	2	2	2	2	2	2	2	2	2	2	0	2	0	2	2	0	0	2	2	0	0	2	2	0	2	2	2	2	2	0	2	0	2	0	2	0	2	2	2	0
IWB685	4	2B	81.92	2	2	0	2	0	2	2	2	2	2	2	2	2	2	2	2	0	2	0	2	2	0	0	2	2	0	0	2	2	0	2	2	2	2	2	0	2	0	2	0	2	0	2	2	2	0
IWB22298	4	2B	85.8	2	2	0	2	0	2	2	2	2	2	2	2	2	2	2	2	0	2	0	2	2	0	0	2	2	0	0	2	2	0	2	2	2	2	2	0	2	0	2	0	2	0	2	2	2	0
IWB71212	4	2B	86.9	2	2	0	2	0	2	2	2	2	2	2	2	2	2	2	2	0	2	0	2	2	0	0	2	2	0	0	2	2	0	2	2	2	2	2	0	2	0	2	0	2	0	2	2	2	0
IWB24879	4	2B	87.46	2	2	0	2	0	2	2	2	2	2	2	2	2	2	2	2	0	2	0	2	2	0	0	2	2	0	0	2	2	0	2	2	2	2	2	0	2	0	2	0	2	0	2	2	2	0
IWB15495	4	2B	88.56	2	2	0	2	0	2	2	2	2	2	2	2	2	2	2	2	0	2	0	2	2	0	0	2	2	0	0	2	2	0	2	2	2	2	2	0	2	0	2	0	2	0	2	2	2	0
IWB11689	4	2B	89.67	2	2	0	2	0	2	2	2	0	2	2	2	2	2	2	2	0	2	0	2	2	0	0	2	2	0	0	2	2	0	2	2	2	2	2	0	2	0	2	0	2	0	2	2	2	0
IWB46532	4	NA	90.22	2	2	0	2	0	2	2	2	0	2	2	2	2	2	2	2	0	2	0	2	2	0	0	2	2	0	0	2	2	0	2	2	2	2	2	0	2	0	2	0	2	0	2	2	2	0
IWB40296	4	NA	90.77	2	2	0	2	0	2	2	2	0	2	2	2	2	2	2	2	0	2	0	2	2	0	0	2	2	0	0	2	2	0	2	2	2	2	2	0	2	0	2	0	2	0	2	2	2	0
IWB20922	4	2B	92.98	2	2	0	2	0	2	2	2	0	2	2	2	2	2	2	2	0	2	0	2	2	0	0	2	2	0	0	2	2	0	2	2	2	2	2	0	2	0	2	0	2	0	2	2	2	0
IWB21476	4	2B	94.09	2	2	0	0	0	2	2	2	0	2	2	2	2	2	2	2	0	2	0	2	2	0	0	2	2	0	0	2	2	0	2	2	2	2	2	0	2	0	2	0	2	0	2	2	2	0
IWB11092	4	2B	94.65	2	2	0	0	0	2	2	2	0	2	2	2	2	2	2	2	0	2	0	2	2	0	0	2	2	0	0	2	2	0	2	2	2	2	2	0	2	0	2	0	2	0	2	2	2	0
IWB22281	4	2B	97.97	2	2	0	0	0	2	2	2	0	2	2	2	2	2	2	2	0	2	0	0	2	0	0	2	0	0	0	2	2	0	2	2	2	2	0	0	2	0	2	0	2	0	2	2	2	0
IWB1188	4	2B	100.74	2	2	0	0	0	2	2	2	0	2	2	2	2	0	2	2	0	2	0	0	2	0	0	2	0	0	0	2	2	0	2	2	2	2	0	0	2	0	2	0	2	2	2	2	2	0
IWB79793	4	2B	104.61	2	2	0	0	0	2	2	2	0	2	2	2	2	0	2	2	0	2	0	0	2	0	0	2	0	0	0	2	2	0	2	2	2	2	0	0	2	0	2	0	2	2	2	2	2	0
IWB25129	4	NA	109.04	2	2	0	0	0	2	2	2	0	2	2	2	2	0	2	2	0	2	0	0	2	0	0	2	0	0	0	2	2	0	2	2	2	2	0	0	2	0	2	0	2	2	2	2	2	0
IWB13421	4	2B	110.15	2	2	0	0	0	2	2	2	0	2	2	2	2	0	2	2	0	2	0	0	2	0	0	2	0	0	0	2	2	0	2	2	2	2	0	0	2	0	2	0	2	2	2	2	2	0
IWB79841	4	2B	110.71	2	2	0	0	0	2	2	2	0	2	0	2	2	0	2	2	-	2	0	0	2	0	0	2	0	0	0	2	2	0	2	2	2	2	0	0	2	0	2	0	2	2	2	2	2	0
IWB26742	4	2B	111.26	2	2	0	0	0	2	2	2	0	2	0	2	2	0	2	2	0	2	0	0	2	0	0	2	0	0	0	2	2	0	2	2	2	2	0	0	2	0	2	0	2	2	2	2	2	0
IWB76339	4	2B	112.37	2	2	0	0	0	2	2	2	0	2	0	2	2	0	2	2	0	2	0	0	2	0	0	2	0	0	0	2	2	0	2	2	2	2	0	0	2	0	2	0	2	2	2	2	2	0
IWB1593	4	2B	112.92	2	2	0	0	0	2	0	2	0	2	0	2	2	0	2	2	0	2	0	0	2	0	0	2	0	0	0	2	2	0	2	2	2	2	0	0	2	0	2	0	2	2	2	2	2	0
IWB39379	4	2B	113.47	2	2	0	0	0	2	0	2	0	2	0	2	2	0	2	2	0	2	0	0	2	0	0	2	0	0	0	2	2	0	2	2	2	2	0	0	2	0	2	0	2	2	2	2	2	0
IWB26896	4	NA	114.03	2	2	0	0	0	2	0	2	0	2	0	2	2	0	2	2	0	2	0	0	2	0	0	2	0	0	0	2	2	0	2	2	2	2	0	0	2	0	2	0	2	2	2	2	2	0
IWB36072	4	2B	114.58	2	2	0	0	0	2	0	2	0	2	0	2	2	0	2	2	0	2	0	0	2	0	0	2	0	0	0	2	2	0	2	2	2	2	0	0	2	0	2	0	2	2	2	2	2	0
IWB2286	4	2B	114.58	2	2	0	0	0	2	0	2	0	2	0	2	2	0	2	2	0	2	0	0	2	0	0	2	0	0	0	2	2	0	2	2	2	2	0	0	2	0	2	0	2	2	2	2	2	0
IWB10027	4	2Dx	115.14	2	2	0	0	0	2	0	2	0	2	0	2	2	0	2	2	0	2	0	0	2	0	0	2	0	0	0	2	2	0	2	2	2	2	0	0	2	0	2	0	2	2	2	2	2	0
IWB67214	4	NA	116.24	2	2	0	0	0	2	0	2	0	2	0	2	2	0	2	2	0	2	0	0	2	0	0	2	0	0	0	2	2	0	2	2	2	2	0	0	2	0	2	0	2	2	2	2	2	0
IWB61305	4	2B	117.9	2	2	0	0	0	2	0	2	0	2	0	2	2	0	2	2	0	2	0	0	2	0	0	2	0	0	0	2	2	0	2	2	2	2	0	0	2	0	2	0	2	2	2	2	2	0
IWB516	4	2B	119	2	2	0	0	0	2	0	2	0	2	0	2	2	0	2	2	0	2	0	0	2	0	0	2	0	0	0	2	2	0	2	2	2	2	0	0	2	0	2	0	2	2	2	2	2	0
IWB79385	4	NA	122.32	2	2	0	0	0	2	0	2	0	2	0	2	2	0	2	2	0	2	0	0	2	0	0	2	0	0	0	2	2	0	2	2	2	2	0	0	2	0	2	0	2	2	2	2	2	0
IWB43411	4	NA	124.53	2	2	0	0	0	2	0	2	0	2	0	2	2	0	2	2	0	2	0	0	2	0	0	2	0	0	0	2	2	0	2	2	2	2	0	0	2	0	2	0	2	2	2	2	2	0
IWB12155	4	2B	125.09	2	2	0	0	0	2	0	2	0	2	0	2	2	0	2	2	0	2	0	0	2	0	0	2	0	0	0	0	2	0	2	2	2	2	0	0	2	0	2	0	2	2	2	2	2	0
IWB10251	4	2B	126.75	2	2	0	0	0	2	2	2	0	2	0	2	2	0	2	2	0	2	0	0	2	0	0	2	0	0	0	0	2	0	2	2	2	2	0	0	2	0	2	0	2	2	0	2	2	0
IWB31663	4	2B	127.3	2	2	0	0	0	2	2	2	0	2	0	2	2	0	2	2	0	2	0	0	2	0	0	2	0	0	0	0	2	0	2	2	2	2	0	0	2	0	2	0	2	2	0	2	2	0
IWB10162	4	2B	127.3	2	2	0	0	0	2	2	2	0	2	0	2	2	0	2	2	0	2	0	0	2	0	0	2	0	0	0	0	2	0	2	2	2	2	0	0	2	0	2	0	2	2	0	2	2	0
IWB10455	4	2B	127.85	2	2	0	0	0	2	2	2	0	2	0	2	2	0	2	2	0	2	0	0	2	0	0	2	0	0	0	0	2	0	2	2	2	2	0	0	2	0	2	0	2	2	0	2	2	0
IWB75000	4	NA	128.41	2	2	0	0	0	2	2	2	0	2	0	2	2	0	2	2	0	2	0	0	2	0	0	2	0	0	0	0	2	0	2	2	2	2	0	0	2	0	2	0	2	2	0	2	2	0
IWB35156	4	2B	128.41	2	2	0	0	0	2	2	2	0	2	0	2	2	0	2	2	0	2	0	0	2	0	0	2	0	0	0	0	2	0	2	2	2	2	0	0	2	0	2	0	2	2	0	2	2	0
IWB44344	4	2B	131.19	2	2	0	0	0	2	2	2	0	2	0	2	2	0	2	2	0	2	0	0	2	0	0	2	0	0	0	0	2	0	2	2	2	2	0	0	2	0	2	0	2	2	0	2	2	0
IWB13249	4	2B	131.74	2	2	0	0	0	2	2	2	0	2	0	2	2	0	2	2	0	2	0	0	2	0	0	2	0	0	0	0	2	0	2	2	2	2	0	0	2	0	2	0	2	2	0	2	2	0
IWB36009	4	2B	134.51	2	2	2	0	0	2	2	2	0	2	0	2	2	0	2	2	0	2	0	0	2	0	0	2	0	0	0	0	2	0	2	2	2	2	0	0	2	0	2	0	2	2	0	2	2	2
IWB34394	4	2B	135.06	2	2	2	0	0	2	2	2	0	2	0	2	2	0	2	2	0	2	0	0	2	0	0	2	0	0	0	0	2	0	2	2	2	2	0	0	2	0	2	0	2	2	0	2	2	2
IWB36916	4	2A	137.28	2	2	2	0	0	2	2	2	0	2	0	2	2	0	2	2	0	2	0	0	2	0	0	2	0	0	0	0	2	0	2	2	2	2	0	0	2	0	2	0	0	2	0	2	0	2
IWB64728	4	2B	137.84	2	2	2	0	0	2	2	2	0	2	0	2	2	0	2	2	0	2	0	0	2	0	0	2	0	0	0	0	2	0	2	2	2	2	0	0	2	0	2	0	0	2	0	2	0	2
IWB48923	4	2B	138.39	2	2	2	0	0	2	2	2	0	2	0	2	2	0	2	2	0	2	0	0	2	0	0	2	0	0	0	0	2	0	2	2	2	2	0	0	2	0	2	0	0	2	0	2	0	2
IWB61115	4	2B	142.29	2	2	2	0	0	2	2	2	0	2	0	2	2	0	2	2	0	2	0	0	2	0	0	2	0	0	0	0	2	0	2	2	2	2	0	0	2	0	2	0	0	2	0	2	0	2
IWB40514	4	2B	143.4	2	2	2	0	0	2	2	2	0	2	-	2	2	0	2	2	0	2	0	0	2	0	0	2	0	0	0	0	2	0	2	2	2	2	0	0	2	0	2	0	0	2	0	2	0	2
IWB72263	4	2A	143.96	2	2	2	0	0	2	2	2	0	2	0	2	2	0	2	2	0	2	0	0	2	0	0	2	0	0	0	0	2	0	2	2	2	2	0	0	2	0	2	0	0	2	0	2	0	2
IWB1524	4	2B	148.42	2	2	2	0	0	2	2	2	2	2	2	2	2	0	2	2	0	0	0	0	2	0	0	2	0	0	0	0	2	0	2	2	2	2	0	0	2	0	2	0	0	0	0	2	0	2
IWB29325	4	2B	148.97	2	2	2	0	0	2	2	2	2	2	2	2	2	0	2	2	0	0	0	0	2	0	0	2	0	0	0	0	2	0	2	2	2	2	0	0	2	0	2	0	0	0	0	2	0	2
IWB36228	4	NA	151.74	2	2	2	0	0	2	2	2	2	2	2	2	2	0	2	0	0	0	0	0	2	0	0	2	0	0	0	0	2	0	2	2	2	2	0	0	2	0	2	2	0	0	0	2	0	2
IWB10173	4	2B	158.4	2	2	2	0	0	2	2	2	2	2	2	2	2	0	2	0	0	0	0	0	2	0	2	2	0	0	0	0	2	0	2	2	2	2	0	0	2	0	2	2	0	0	0	2	0	0
IWB62763	4	2B	158.96	2	2	2	0	0	2	2	2	2	2	2	2	2	0	2	0	0	0	0	0	2	0	2	2	0	0	0	0	2	0	2	2	2	2	0	0	2	0	2	2	0	0	0	2	0	0
IWB11987	4	NA	160.06	2	2	2	0	0	2	2	2	2	2	2	2	2	0	2	0	0	0	0	0	2	0	2	2	0	0	0	0	2	0	2	2	2	2	0	0	2	0	2	2	0	0	0	2	0	0
IWB12117	4	2B	160.61	2	2	2	0	0	2	2	2	2	2	2	2	2	0	2	0	0	0	0	0	2	0	2	2	0	0	0	0	2	0	0	2	2	2	0	0	2	0	2	2	0	0	0	2	0	0
IWB21954	4	2B	161.17	2	2	2	0	0	2	2	2	2	2	2	2	2	0	2	0	0	0	0	0	2	0	2	2	0	0	0	0	2	0	0	2	2	2	0	0	2	0	2	2	0	0	0	2	0	0
IWB26954	4	2B	162.27	2	2	2	0	0	2	2	2	2	0	2	2	2	0	2	0	0	0	0	0	0	0	2	2	0	0	0	0	2	0	0	2	2	2	0	0	2	0	2	2	0	0	0	2	0	0
IWB12290	4	2B	166.7	2	2	2	0	0	2	2	2	2	0	2	2	2	0	2	0	0	0	0	0	0	0	2	2	0	0	0	0	2	0	0	2	2	2	0	0	2	0	2	2	0	0	0	2	0	2
IWB60385	4	2B	167.26	2	2	2	0	0	2	2	2	2	0	2	2	2	0	2	0	0	0	0	0	0	0	2	2	0	0	0	0	2	0	0	2	2	2	0	0	2	0	2	2	0	0	0	2	0	2
IWB10005	4	2B	168.37	2	2	2	0	0	2	2	2	2	0	2	2	2	0	2	0	0	0	0	0	0	0	2	2	0	0	0	0	2	0	0	2	2	2	0	0	2	0	2	2	0	0	0	2	0	2
IWB31468	4	2B	168.92	2	2	2	0	0	2	2	2	2	0	2	2	2	0	2	0	0	0	0	0	0	0	2	2	0	0	0	0	2	0	0	2	2	2	0	0	2	0	2	2	0	0	0	2	0	2
IWB11171	4	2B	170.03	2	2	2	0	0	2	0	2	2	0	2	2	2	0	2	0	0	0	0	0	0	0	2	2	0	0	0	0	2	0	0	2	2	2	0	0	2	0	2	2	0	0	0	2	0	2
IWB10580	4	NA	170.58	2	2	2	0	0	2	0	2	2	0	2	2	2	0	2	0	0	0	0	0	0	0	2	2	0	0	0	0	2	0	0	2	2	2	0	0	2	0	2	2	0	0	0	2	0	2
IWB7757	4	2A	171.13	2	2	2	0	0	2	0	2	2	0	2	2	2	0	2	0	0	0	0	0	0	0	2	2	0	0	0	0	2	0	0	2	2	2	0	0	2	0	2	2	0	0	0	2	0	2
IWB25553	4	1A	192.18	0	2	2	0	0	0	0	2	0	0	0	0	2	0	0	0	0	0	0	0	0	0	2	2	0	0	0	0	0	0	0	0	2	2	0	0	2	0	0	0	0	0	0	2	0	2
IWB48218	4	3B	229.24	0	2	0	0	0	0	0	2	0	2	0	2	2	0	0	2	0	0	0	0	2	0	0	2	0	0	0	0	0	0	0	2	0	2	0	0	2	0	2	0	2	2	0	2	2	0
IWB9878	5	7D	0	0	2	0	2	2	2	2	2	0	2	2	0	2	0	2	2	0	2	2	2	0	2	2	2	2	2	2	2	2	2	2	2	2	2	0	2	0	0	2	0	2	2	2	2	2	2
IWB42945	5	2A	27.28	0	2	0	0	0	2	2	2	0	2	2	0	2	2	2	2	0	2	2	2	0	0	2	2	2	2	2	2	2	2	0	2	2	2	0	2	2	0	2	0	2	2	2	2	2	2
IWB8362	5	2A	58.38	0	2	0	0	0	0	2	0	0	2	2	0	0	0	0	2	0	2	2	2	0	0	2	0	2	2	2	2	2	2	0	2	2	2	0	0	0	0	2	0	2	0	2	0	0	2
IWB46583	5	2A	59.48	0	2	0	0	0	0	2	0	0	2	2	0	0	0	0	2	0	2	2	2	0	0	2	0	2	2	2	2	2	2	0	2	2	2	0	0	0	0	2	0	2	0	2	0	0	0
IWB6858	5	2A	60.04	0	2	0	0	0	0	2	0	0	2	2	0	0	0	0	2	0	2	2	2	0	0	2	0	2	2	2	2	2	2	0	2	2	2	0	0	0	0	2	0	2	0	2	0	0	0
IWB78885	5	NA	61.69	0	2	0	0	0	0	2	0	0	2	2	0	0	0	0	2	0	2	2	2	0	0	2	0	2	2	2	2	2	2	0	2	2	2	0	0	0	0	2	0	2	0	2	0	0	0
IWB11734	5	2A	62.25	0	2	0	0	0	0	2	0	0	2	2	0	0	0	0	2	0	2	2	2	0	0	2	0	2	2	2	2	2	2	0	2	2	2	0	0	0	0	2	0	2	0	2	0	0	0
IWB71058	5	NA	63.91	0	2	0	0	0	0	2	0	0	2	2	0	0	0	0	2	0	2	2	2	0	0	2	0	2	2	2	2	2	2	0	2	2	2	0	0	0	0	2	0	2	0	2	0	0	2
IWB8574	5	2A	65.03	0	2	0	0	0	0	2	0	0	2	2	0	0	0	0	2	0	2	2	2	0	0	2	0	2	2	2	2	2	2	0	2	2	2	0	0	0	0	2	0	2	0	2	0	0	2
IWB34575	5	2A	72.87	0	2	0	0	0	0	2	0	0	2	2	0	0	0	2	2	0	2	2	2	0	0	2	0	2	2	2	2	2	2	0	2	0	2	0	0	0	0	2	0	2	0	2	0	2	2
IWB1996	5	2A	73.43	0	2	0	0	0	0	2	0	0	2	2	0	0	0	2	2	0	2	2	2	0	0	2	0	2	2	2	2	2	2	0	2	0	2	0	0	0	0	2	0	2	0	2	0	2	2
IWB314	5	2B	75.09	0	2	0	0	0	0	2	0	0	2	2	0	0	0	2	2	0	2	2	2	0	0	2	0	2	2	2	2	2	2	0	2	0	2	0	0	0	0	2	0	2	0	2	0	2	2
IWB30196	5	2A	102.37	2	2	2	2	2	2	2	2	2	2	2	2	2	2	2	2	2	2	2	2	2	2	2	2	2	2	2	2	2	2	2	2	2	2	2	2	2	2	2	2	2	2	2	2	2	2
IWB4170	5	2A	118.12	0	2	0	0	0	0	2	0	2	2	0	2	0	2	2	2	0	2	2	0	0	0	2	0	0	2	2	2	0	0	0	2	0	2	0	0	0	2	2	0	2	0	2	0	2	2
IWB17231	5	NA	118.69	0	2	0	0	0	0	2	0	2	2	0	0	0	2	2	2	0	2	2	0	0	0	2	0	0	2	2	2	0	0	0	2	0	2	0	0	0	2	2	0	2	0	2	0	2	2
IWB52048	5	NA	119.79	0	0	0	0	0	0	2	0	2	2	0	0	0	2	2	2	0	2	2	0	0	0	2	0	0	2	2	2	0	0	0	2	0	2	0	0	0	2	2	0	2	0	2	0	2	2
IWB38835	5	NA	119.79	0	-	0	0	0	0	2	0	2	2	0	0	0	2	2	2	0	2	2	0	0	0	2	0	0	2	2	2	0	0	0	2	0	2	0	0	0	2	2	0	2	0	2	0	2	2
IWB10298	5	NA	119.79	0	2	0	0	0	0	2	0	2	2	0	0	0	2	2	2	0	2	2	0	0	0	2	0	0	2	2	2	0	0	0	2	0	2	0	0	0	2	2	0	2	0	2	0	2	2
IWB43851	5	2Dx	120.36	0	2	0	0	0	0	2	0	2	2	0	0	0	2	2	2	0	2	2	0	0	0	2	0	0	2	2	2	0	0	0	2	0	2	0	0	0	2	2	0	2	0	2	0	2	2
IWB10119	5	NA	120.92	0	2	0	0	0	0	2	0	2	2	0	0	0	2	2	2	0	2	2	0	0	0	2	0	0	2	2	2	0	0	0	2	0	2	0	0	0	2	2	0	2	0	2	0	2	2
IWB21598	5	2A	121.48	0	2	0	0	0	0	2	0	2	2	0	0	0	2	2	2	0	2	2	0	0	0	2	0	0	2	2	2	0	0	0	2	0	2	0	0	0	2	2	0	2	0	2	0	2	2
IWB22971	5	2B	122.58	0	2	0	0	0	0	2	0	2	2	0	0	0	2	2	2	0	2	2	0	0	0	2	0	0	2	2	2	0	0	0	2	0	2	0	0	0	2	2	0	2	0	2	0	2	2
IWB54374	5	2A	123.69	0	2	0	0	0	0	2	0	2	2	0	0	0	2	2	2	0	2	2	0	0	0	2	0	0	2	2	2	0	0	0	2	0	2	0	0	0	0	2	0	2	0	2	0	2	2
IWB32398	5	2A	146.07	0	0	0	0	0	0	2	0	0	2	0	0	0	0	2	2	0	2	0	0	0	0	0	0	0	0	0	0	0	0	0	0	0	0	0	0	0	0	2	0	0	0	2	0	2	0
IWB50723	6	3D	0	0	2	0	0	2	2	2	0	2	2	0	2	0	0	2	0	2	2	2	0	0	2	0	0	0	2	2	2	2	2	0	0	0	2	2	0	0	2	0	0	0	0	2	0	0	2
IWB16145	6	3D	8.93	0	2	0	0	2	2	2	0	0	2	0	2	0	0	2	0	2	2	2	0	0	2	0	0	0	2	2	2	2	2	0	0	2	2	2	2	2	2	0	0	0	0	0	0	0	2
IWB9674	6	3D	15.04	0	2	0	0	2	2	2	0	0	2	0	2	0	0	2	0	2	2	2	0	0	2	0	0	0	2	2	2	2	2	0	0	2	2	2	2	2	2	0	0	0	2	0	0	0	0
IWB42682	6	3D	23.41	0	2	2	2	2	2	2	0	0	2	0	2	0	0	2	0	2	2	0	0	0	2	0	0	0	0	2	2	2	0	0	0	2	2	2	2	2	2	0	2	0	2	0	0	0	0
IWB11545	6	3A	28.39	0	2	2	2	0	2	2	0	0	2	2	2	0	0	2	0	2	0	0	0	0	2	0	0	0	0	2	2	2	0	0	0	2	2	2	2	2	2	0	2	0	2	0	0	0	0
IWB8289	6	3D	32.55	2	2	2	2	0	2	2	0	0	0	2	2	0	0	2	0	2	0	0	0	0	2	0	0	0	0	2	-	-	0	0	0	2	-	2	2	-	2	0	2	0	2	0	0	0	0
IWB8246	6	3D	36.17	0	2	2	2	0	2	2	0	0	0	2	2	0	0	2	0	2	0	0	0	0	2	0	0	0	0	2	2	2	0	0	0	2	2	2	2	2	2	0	2	0	2	0	0	0	0
IWB10683	6	3D	36.17	0	2	2	2	0	2	2	0	0	0	2	2	0	0	2	0	2	0	0	0	0	2	0	0	0	0	2	2	2	0	0	0	2	2	2	2	2	2	0	2	0	2	0	0	0	0
IWB41433	6	3A	36.72	0	2	2	2	0	2	2	0	0	0	2	2	0	0	2	0	2	0	0	0	0	2	0	0	0	0	2	2	2	0	0	0	2	2	2	2	2	2	0	2	0	2	0	0	0	0
IWB8833	6	3D	37.82	0	0	2	2	0	2	2	0	0	0	2	2	0	0	2	0	2	0	0	0	0	2	0	0	0	0	2	2	2	0	0	0	2	2	2	2	2	2	0	2	0	2	0	0	0	0
IWB26694	6	NA	60.2	0	2	0	2	0	2	0	0	0	0	2	2	0	0	2	0	2	0	0	0	0	2	0	0	0	0	2	0	2	0	0	0	0	2	0	0	2	2	0	0	0	0	0	0	0	0
IWB41352	7	2Dx	0	2	2	2	0	0	2	0	2	2	0	2	2	2	2	2	0	2	0	0	0	0	0	2	2	0	0	2	0	2	2	0	2	2	2	0	2	2	0	2	2	0	0	0	2	2	2
IWB23406	7	2A	19.75	2	2	2	0	0	2	0	2	2	0	2	0	2	2	2	0	2	0	0	0	0	0	0	2	0	0	2	0	2	2	0	2	0	2	0	2	2	0	2	2	0	0	0	2	2	0
IWB55638	7	2Dx	22.53	2	2	0	0	0	2	0	2	2	0	2	0	2	2	2	0	2	0	0	0	0	0	0	2	0	0	2	0	2	2	0	2	0	2	0	2	2	0	2	2	0	0	0	2	2	0
IWB64156	7	2Dx	24.76	2	2	0	0	0	2	0	2	2	0	2	0	2	2	2	0	2	0	0	0	0	0	0	2	0	0	2	0	2	2	0	2	0	2	0	2	2	0	2	2	0	0	0	2	2	0
IWB14834	7	2A	28.09	2	2	0	0	0	2	0	2	2	0	2	0	2	2	2	0	2	0	0	0	0	0	0	2	0	0	2	0	2	2	0	2	0	2	0	2	2	0	2	2	0	0	0	2	2	0
IWB44619	7	2A	28.65	2	2	0	0	0	2	0	2	2	0	2	0	2	2	2	0	2	0	0	0	0	0	0	2	0	0	2	0	2	2	0	2	0	2	0	2	2	0	2	2	0	0	0	2	2	0
IWB165	7	2B	29.21	2	2	0	0	0	2	0	2	2	0	2	0	2	2	2	0	2	0	0	0	0	0	0	2	0	0	2	0	2	2	0	2	0	2	0	2	2	0	2	0	0	0	0	2	2	0
IWB13404	7	2B	29.76	2	2	0	0	0	2	0	2	2	0	2	0	2	2	2	0	2	0	0	0	0	0	0	2	0	0	2	0	2	2	0	2	0	2	0	2	2	0	2	0	0	0	0	2	2	0
IWB10051	7	2Dx	30.31	2	2	0	0	0	2	0	2	2	0	2	0	2	2	2	0	2	0	0	0	0	0	0	2	0	0	2	0	2	2	0	2	0	2	0	2	2	0	2	0	0	0	0	2	2	0
IWB64953	7	NA	31.42	2	2	0	0	0	2	0	2	2	0	2	0	2	2	2	0	2	0	0	0	0	0	0	2	0	0	2	2	2	2	0	2	0	2	0	2	2	0	2	0	0	0	0	2	2	0
IWB12337	7	2Dx	32.52	2	2	0	0	0	2	0	2	2	0	2	0	2	2	2	0	2	0	0	0	0	0	0	2	0	0	2	2	2	2	0	2	0	2	0	2	2	0	2	0	2	0	0	2	2	0
IWB11978	7	2A	34.73	2	2	0	0	0	2	0	2	2	0	2	0	2	2	2	0	2	0	0	0	0	0	0	2	0	0	2	2	2	2	0	2	0	2	0	2	2	0	2	0	2	0	0	2	2	0
IWB27309	7	2A	35.28	2	2	0	0	0	2	0	2	2	0	2	0	2	2	2	0	2	0	0	0	0	0	0	2	0	0	2	2	2	2	0	2	0	2	0	2	2	0	2	0	2	0	0	2	2	0
IWB73712	7	2A	36.39	2	2	0	0	0	2	0	2	2	0	2	0	2	2	2	0	2	0	0	0	0	0	0	2	0	0	2	2	2	2	0	2	0	2	0	2	0	0	2	0	2	0	0	2	2	0
IWB25650	7	2A	36.94	2	2	0	0	0	2	0	2	2	0	2	0	2	2	2	0	2	0	0	0	0	0	0	2	0	0	2	2	2	2	0	2	0	2	0	2	0	0	2	0	2	0	0	2	2	0
IWB71816	7	2A	36.94	2	2	0	0	0	2	0	2	2	0	2	0	2	2	2	0	2	0	0	0	0	0	0	2	0	0	2	2	2	2	0	2	0	2	0	2	0	0	2	0	2	0	0	2	2	0
IWB14076	7	2A	37.5	2	2	0	0	0	2	0	2	2	0	2	0	2	2	2	0	2	0	0	0	0	0	0	2	0	0	2	2	2	2	0	2	0	2	0	2	0	0	2	0	2	0	0	2	2	0
IWB836	7	2A	38.05	2	2	0	0	0	2	0	2	2	0	2	0	2	2	2	0	2	0	0	0	0	0	0	2	0	0	2	2	2	2	0	2	0	2	0	2	0	0	2	0	2	0	0	2	2	0
IWB3440	7	2A	39.71	2	2	0	0	0	2	0	2	2	0	2	0	2	2	2	0	2	0	0	0	0	0	0	2	0	0	2	2	2	2	0	2	0	2	0	2	0	0	2	0	2	0	0	2	2	0
IWB3746	7	2A	40.26	2	2	0	0	0	2	0	2	2	0	2	0	2	2	2	0	2	0	0	0	0	0	0	2	0	0	2	2	2	2	0	2	0	2	0	2	0	0	2	0	2	0	0	2	2	0
IWB61119	7	2A	40.81	2	2	0	0	0	2	0	2	2	0	2	0	2	2	2	0	2	0	0	0	0	0	0	2	0	0	2	2	2	2	0	2	0	2	0	2	0	0	2	0	2	0	0	2	2	0
IWB23156	7	2A	41.37	2	2	0	0	0	2	0	2	2	0	2	0	2	2	2	0	2	0	0	0	0	0	0	2	0	0	2	2	2	2	0	2	0	2	0	2	0	0	2	0	2	0	0	2	2	0
IWB12554	7	2A	41.92	2	2	0	0	0	2	0	2	2	0	2	0	2	2	2	0	2	0	0	0	0	0	0	2	0	0	2	2	2	2	0	2	0	2	0	2	0	0	2	0	2	0	0	2	2	2
IWB25799	7	2A	42.47	2	2	0	0	0	2	0	2	2	0	2	0	2	2	2	0	2	0	0	0	0	0	0	2	0	0	2	2	2	2	0	2	0	2	0	2	0	0	2	0	2	0	0	2	2	2
IWB1094	7	2A	43.58	2	2	0	0	0	2	0	2	2	0	2	0	2	2	2	0	2	0	0	0	0	0	0	2	0	0	2	2	2	2	0	2	0	2	0	2	0	0	2	0	2	0	0	2	2	2
IWB24212	7	2A	44.68	2	2	0	0	0	2	0	2	2	0	2	0	2	2	2	0	2	0	0	0	0	0	0	2	0	0	2	2	2	2	0	2	0	2	0	2	0	0	2	0	2	0	0	2	2	2
IWB60040	7	2A	45.23	2	2	0	0	0	2	0	2	2	0	2	0	2	2	2	0	2	0	0	0	0	0	0	2	0	0	2	2	2	2	0	2	0	2	0	2	0	0	2	0	2	0	0	2	2	2
IWB26553	7	2A	45.79	2	2	0	0	0	2	0	2	2	0	2	0	2	2	2	0	2	0	0	0	0	0	0	2	0	0	2	2	2	2	0	2	0	2	0	2	0	0	2	0	2	0	0	2	2	2
IWB12477	7	2A	46.34	2	2	0	0	0	2	0	2	2	0	2	0	2	2	2	0	2	0	0	0	0	0	0	2	0	0	2	2	2	2	0	2	0	2	0	2	0	0	2	0	2	0	0	2	2	2
IWB31368	7	2A	46.89	2	2	0	0	0	2	0	2	2	0	2	0	2	2	2	0	2	0	0	0	0	0	0	2	0	0	2	2	2	2	0	2	0	2	0	2	0	0	2	0	2	0	0	2	2	2
IWB11146	7	2A	47.45	2	2	0	0	0	2	0	2	2	0	2	0	2	2	2	0	2	0	0	0	0	0	0	2	0	0	2	2	2	2	0	2	0	2	0	2	0	0	2	0	2	0	0	2	2	2
IWB34219	7	6A	50.77	2	2	0	0	0	2	0	2	2	0	2	0	2	2	2	0	2	0	0	0	0	0	0	2	0	0	2	2	2	2	0	2	0	2	0	2	0	0	0	0	2	0	0	2	2	2
IWB5787	7	2A	54.09	2	2	0	0	0	2	0	2	2	0	2	0	2	2	2	0	2	0	0	0	0	0	0	2	0	0	2	2	2	2	0	2	2	2	0	2	0	0	0	0	2	0	0	2	2	2
IWB77401	7	2A	54.64	2	2	0	0	0	2	0	2	2	0	2	0	2	2	2	0	2	0	0	0	0	0	0	2	0	0	2	2	2	2	0	2	2	2	0	2	0	0	0	0	2	0	0	2	2	2
IWB24443	7	2A	55.19	2	2	0	0	0	2	0	2	2	0	2	0	2	2	2	0	2	0	0	0	0	0	0	2	0	0	2	2	2	2	0	2	2	2	0	2	0	0	0	0	2	0	0	2	2	2
IWB30766	7	2Dx	55.75	2	2	0	0	0	2	0	2	2	0	2	0	2	2	2	0	2	0	0	0	0	0	0	2	0	0	2	2	2	2	0	2	2	2	0	2	0	0	0	0	2	0	0	2	2	2
IWB76680	7	2A	57.96	2	2	0	0	0	0	0	2	2	0	2	0	2	2	2	0	2	0	0	0	0	2	0	2	0	0	2	2	2	2	0	2	2	2	0	2	0	0	0	0	2	0	0	2	2	2
IWB13862	7	3D	58.51	2	2	0	0	0	0	0	2	2	0	2	0	2	2	2	0	2	0	0	0	0	2	0	2	0	0	2	2	2	2	0	2	2	2	0	2	0	0	0	0	2	0	0	2	0	2
IWB64379	7	2A	65.74	0	2	0	0	0	0	0	2	2	0	2	0	2	2	2	0	2	0	0	0	0	2	0	2	0	0	2	2	2	2	0	2	2	2	0	2	0	0	0	0	2	0	2	2	0	2
IWB38933	7	2A	68.51	0	2	0	0	0	0	0	2	2	0	2	0	2	2	2	0	2	0	0	0	0	2	2	2	0	0	2	2	2	2	0	2	2	2	0	2	0	0	0	0	2	0	2	2	0	2
IWB3052	7	2Dx	69.06	0	2	0	0	0	0	0	2	2	0	2	0	2	2	2	0	2	0	0	0	0	2	2	2	0	0	2	2	2	2	0	2	2	2	0	2	0	0	0	0	2	0	2	2	0	2
IWB12381	7	NA	73.49	0	2	0	0	0	0	0	2	2	0	2	0	2	0	0	0	2	0	0	0	0	2	2	2	0	0	2	2	2	2	0	2	2	2	0	2	0	0	0	0	2	0	2	2	0	0
IWB11887	7	2A	74.05	0	2	0	0	0	0	0	2	2	0	2	0	2	0	0	0	2	0	0	0	0	2	2	2	0	0	2	2	2	2	0	2	2	2	0	2	0	0	0	0	2	0	2	2	0	0
IWB11194	7	2Dx	75.7	0	2	0	0	0	0	0	2	2	0	2	0	2	0	0	0	2	0	0	0	0	2	2	2	0	0	2	2	2	2	0	2	2	2	0	2	0	0	0	0	2	0	2	2	0	0
IWB65968	7	2A	78.47	0	2	0	0	0	0	0	2	2	0	2	0	2	0	0	0	2	0	0	0	0	2	2	2	0	0	2	2	2	2	0	2	2	2	0	2	0	0	0	0	2	0	2	2	0	0
IWB11764	7	2A	79.02	0	2	0	0	0	0	0	2	2	0	2	0	2	0	0	0	2	0	0	0	0	2	2	2	0	0	2	2	2	2	0	2	2	2	0	2	0	0	0	0	2	0	2	2	0	0
IWB14315	7	2A	80.13	0	2	0	0	0	0	0	2	2	0	2	0	2	0	0	0	2	0	0	0	0	0	2	2	0	0	2	2	2	2	0	2	2	2	0	2	0	0	0	0	2	0	2	2	0	0
IWB12368	7	NA	80.68	0	2	0	0	0	0	0	2	2	0	2	0	2	0	0	0	2	0	0	0	0	0	2	2	0	0	2	2	2	2	0	2	2	2	0	2	0	0	0	0	2	0	2	2	0	0
IWB5745	7	2A	82.34	0	2	0	0	0	0	0	2	2	0	2	0	2	0	0	0	2	0	0	0	0	0	2	2	0	0	2	2	2	2	0	2	2	2	0	2	0	0	0	0	2	0	2	2	0	0
IWB11614	7	2A	83.44	0	2	0	0	0	0	0	2	2	0	2	0	2	0	0	0	2	0	0	0	0	0	2	2	0	0	2	2	2	2	0	2	2	2	0	2	0	0	0	0	2	0	2	2	0	0
IWB49572	7	2B	84.55	0	2	0	0	0	0	0	0	2	0	2	0	2	0	0	0	2	0	0	0	0	0	2	2	0	0	2	2	2	2	0	2	2	2	0	2	0	0	0	0	2	0	2	2	0	0
IWB28464	7	NA	86.2	0	2	0	0	0	0	2	2	2	0	2	0	2	0	0	0	2	0	0	0	0	0	2	2	0	0	2	2	2	2	0	2	2	2	0	2	0	0	0	0	2	0	2	2	0	0
IWB1186	7	NA	86.76	0	2	0	0	0	0	2	2	2	0	2	0	2	0	0	0	2	0	0	0	0	0	2	2	0	0	2	2	2	2	0	2	2	2	0	2	0	0	0	0	2	0	2	2	0	0
IWB35296	7	2B	87.31	0	2	0	0	0	0	2	2	2	0	2	0	2	0	0	0	2	0	0	0	0	0	2	2	0	0	2	2	2	2	0	2	2	2	0	2	0	0	0	0	2	0	2	2	0	0
IWB32429	7	NA	88.42	0	2	0	0	0	0	2	2	2	0	2	0	2	0	0	0	2	0	0	0	0	0	2	2	0	0	2	2	2	2	0	2	2	2	0	2	0	0	0	0	2	0	2	2	0	0
IWB24563	7	NA	88.97	0	2	0	0	0	0	2	2	0	0	2	0	2	0	0	0	2	0	0	0	0	0	2	2	0	0	2	2	2	2	0	2	2	2	0	2	0	0	0	0	2	0	2	2	0	0
IWB44073	7	NA	91.18	0	2	0	0	0	0	2	2	0	0	2	0	2	0	0	2	2	0	0	0	0	0	2	2	0	0	2	2	2	2	0	2	2	2	0	2	0	0	0	0	2	0	2	2	0	0
IWB22575	7	NA	91.73	0	2	0	0	0	0	2	2	0	0	2	0	2	0	0	2	2	0	0	0	0	0	2	2	0	0	2	2	2	2	0	2	2	2	0	2	0	0	0	0	2	0	2	2	0	0
IWB57371	7	2A	101.29	0	2	0	0	0	0	2	0	0	0	2	0	0	0	0	2	0	0	0	0	0	0	2	0	0	0	2	2	2	2	0	2	2	2	0	2	0	0	0	0	2	0	2	0	0	0
IWB10114	7	NA	106.87	0	2	0	0	0	0	2	0	0	0	2	0	0	0	0	2	0	0	0	0	0	0	2	0	0	0	2	0	2	2	0	2	2	2	0	2	0	0	0	0	2	0	2	0	0	0
IWB27082	7	NA	107.97	0	0	0	0	0	0	2	0	0	0	2	0	0	0	0	2	0	0	0	0	0	0	2	0	0	0	2	0	2	2	0	2	2	2	0	2	0	0	0	0	2	0	2	0	0	0
IWB20476	7	NA	109.08	0	0	0	0	0	0	2	0	0	0	2	0	0	0	0	2	0	0	0	0	0	0	2	0	0	0	2	0	2	2	0	2	2	2	0	2	0	0	0	0	2	2	2	0	0	0
IWB10485	7	2A	110.74	0	2	0	0	0	0	2	0	0	0	2	0	0	0	0	2	0	0	0	0	0	0	2	0	0	0	2	0	2	2	0	2	2	2	0	2	0	0	0	0	2	0	2	2	0	0
IWB57901	7	2A	112.95	0	2	0	0	0	0	2	0	0	0	2	0	0	0	0	2	0	0	0	0	0	0	2	0	0	0	2	0	2	2	0	2	2	2	0	2	0	0	0	0	2	0	2	0	0	0
IWB80319	7	2A	113.51	0	2	0	0	0	0	2	0	0	0	2	0	0	0	0	2	0	0	0	0	0	0	2	0	0	0	2	0	2	2	0	2	2	2	0	2	0	0	0	0	2	0	2	0	0	0
IWB1	7	2A	114.07	0	2	0	0	0	0	2	0	0	0	2	0	0	0	0	2	0	0	0	0	0	0	2	0	0	0	2	0	2	2	0	2	2	2	0	2	0	0	0	0	2	0	2	0	0	0
IWB869	7	7B	114.63	0	2	0	0	0	0	2	0	0	0	2	0	0	0	0	2	0	0	0	0	0	0	2	0	0	0	2	0	2	2	0	2	2	2	0	2	0	0	0	0	2	0	2	0	0	0
IWB19888	7	NA	115.73	0	2	0	0	0	0	2	0	0	0	2	0	0	0	0	2	0	0	0	0	0	0	2	0	0	0	2	0	2	2	0	2	2	2	0	2	0	0	0	0	2	0	2	0	0	0
IWB20710	7	2A	116.84	0	2	0	0	0	0	2	0	0	0	2	0	0	0	0	2	0	0	0	0	0	0	2	0	0	0	2	0	2	2	0	2	2	2	0	2	0	0	0	0	2	0	2	0	0	0
IWB13597	7	2A	117.94	0	2	0	0	0	0	2	0	0	0	2	0	0	0	0	2	0	0	0	0	0	0	2	0	0	0	2	0	2	2	0	2	2	2	0	2	0	0	0	0	2	0	2	0	0	0
IWB10343	7	2A	118.49	0	2	0	0	0	0	2	0	0	0	2	0	0	0	0	2	0	0	0	0	0	0	2	0	0	0	2	0	2	2	0	2	2	2	0	2	0	0	0	0	2	0	2	0	0	0
IWB5320	7	2A	119.05	0	2	0	0	0	0	2	0	0	0	2	0	0	0	0	2	0	0	0	0	0	0	2	0	0	0	2	0	2	2	0	2	2	2	0	2	0	0	0	0	2	0	2	0	0	0
IWB4047	7	2Dx	122.37	2	2	0	0	0	0	2	0	0	0	2	0	0	0	0	2	0	0	0	0	0	0	2	0	0	0	2	0	2	2	0	2	2	2	0	2	0	0	2	0	2	0	2	0	0	0
IWB21265	7	2A	124.03	0	2	0	0	0	0	2	0	0	0	2	0	0	0	0	2	0	0	0	0	0	0	2	0	0	0	2	0	2	2	0	2	2	2	0	2	0	0	2	0	2	0	2	0	0	0
IWB21267	7	2A	124.03	0	2	0	0	0	0	2	0	0	0	2	0	0	0	0	2	0	0	0	0	0	0	2	0	0	0	2	0	2	2	0	2	2	2	0	2	0	0	2	0	2	0	2	0	0	0
IWB11079	7	2A	124.59	0	2	0	0	0	0	2	0	0	0	2	0	0	0	0	2	0	0	0	0	0	0	2	0	0	0	2	0	2	2	0	2	2	2	0	2	0	0	2	0	2	0	2	0	0	0
IWB1047	7	2A	125.14	0	2	0	0	0	0	2	0	0	0	2	0	0	0	0	2	0	0	0	0	0	0	2	0	0	0	2	0	2	2	0	2	2	2	0	2	0	0	2	0	2	0	2	0	0	0
IWB12556	7	NA	130.13	0	2	0	0	0	0	2	0	0	0	2	0	0	0	0	2	0	0	0	0	0	0	2	0	0	0	2	2	2	2	0	2	2	2	0	2	0	0	2	0	2	0	2	0	0	0
IWB12494	7	2A	130.13	0	2	0	0	0	0	2	0	0	0	2	0	0	0	0	2	0	0	0	0	0	0	2	0	0	0	2	2	2	2	0	2	2	2	0	2	0	0	2	0	2	0	2	0	0	0
IWB54547	7	2A	135.23	0	2	0	0	0	0	2	0	0	0	2	0	0	0	0	2	0	0	0	0	0	0	2	0	0	0	2	2	2	2	0	2	2	2	0	2	0	0	2	0	2	0	2	0	0	0
IWB65384	7	NA	137.44	0	2	0	0	0	0	2	0	0	0	2	0	0	0	0	2	0	2	0	0	0	0	2	0	0	0	2	2	2	2	0	2	2	2	0	2	0	0	2	0	2	0	2	0	0	0
IWB54119	8	1B	0	0	0	2	0	0	2	0	2	2	0	2	0	2	2	0	0	2	0	2	2	2	0	2	2	2	2	2	2	0	2	0	0	0	0	0	2	2	2	0	2	2	0	2	2	0	2
IWB1371	8	1B	6.14	0	0	2	0	0	2	0	2	2	0	2	2	2	2	0	0	2	2	2	2	2	0	2	2	2	2	2	2	0	2	0	0	0	0	0	2	2	2	0	2	2	0	2	2	0	2
IWB11858	8	1B	6.69	0	0	2	0	0	2	0	2	2	0	2	2	2	2	0	0	2	2	2	2	2	0	2	2	2	2	2	2	0	2	0	0	0	0	0	2	2	2	0	2	2	0	2	2	0	2
IWB31152	8	1B	7.25	0	0	2	0	0	2	0	2	2	0	2	2	2	2	0	0	2	2	2	2	0	0	2	2	2	2	2	2	0	2	0	0	0	0	0	2	2	2	0	2	2	0	2	2	0	2
IWB11351	8	1B	7.25	0	0	2	0	0	2	0	2	2	0	2	2	2	2	0	0	2	2	2	2	0	0	2	2	2	2	2	2	0	2	0	0	0	0	0	2	2	2	0	2	2	0	2	2	0	2
IWB12325	8	1B	7.8	0	0	2	0	0	2	0	2	2	0	2	2	2	2	0	0	2	2	2	2	0	0	2	2	2	2	2	2	0	0	0	0	0	0	0	2	2	2	0	2	2	0	2	2	0	2
IWB46187	8	1B	8.91	0	0	2	0	0	2	0	2	2	0	2	2	2	2	0	0	2	2	2	2	0	0	2	2	2	2	2	2	0	0	0	0	0	0	0	2	2	2	0	2	2	0	2	2	0	2
IWB58356	8	1B	22.57	0	2	2	0	0	2	0	2	2	2	2	2	2	2	0	0	2	2	0	2	0	0	2	2	2	0	2	2	0	0	0	0	0	2	2	2	2	2	0	2	2	0	2	2	0	2
IWB12356	8	1B	23.13	0	2	2	0	0	2	0	2	2	2	2	2	2	2	0	0	2	2	0	2	0	0	2	2	2	0	2	2	0	0	0	0	0	2	2	2	2	2	0	2	2	0	2	2	0	2
IWB42194	8	1B	23.68	0	2	2	0	0	2	0	2	2	2	2	2	2	2	0	0	2	2	0	2	0	0	2	2	2	0	2	2	0	0	0	0	0	2	2	2	2	2	0	2	2	0	2	2	0	2
IWB10409	8	NA	25.34	0	2	2	0	0	2	0	2	2	2	2	2	2	2	0	0	2	2	0	2	0	0	2	2	2	0	2	2	0	0	0	0	0	2	2	2	2	2	0	2	2	0	2	2	0	2
IWB29956	8	1B	25.89	0	2	2	0	0	2	0	2	2	2	2	2	2	2	0	0	2	2	0	2	0	0	2	2	2	0	2	2	0	0	0	0	0	2	2	2	2	2	0	2	2	0	2	2	0	2
IWB12504	8	1B	26.44	0	2	2	0	0	2	0	2	2	2	2	2	2	2	0	0	2	2	0	2	0	0	2	2	2	0	2	2	0	0	0	0	0	2	2	2	2	2	0	2	2	0	2	2	0	2
IWB1072	8	1B	28.1	0	2	2	0	0	2	0	2	2	2	2	2	2	2	0	0	2	2	0	2	0	0	2	2	2	0	2	2	0	0	0	0	0	2	2	2	2	2	0	2	2	0	2	2	0	2
IWB11437	8	1B	30.31	0	2	2	0	0	2	0	2	2	2	2	2	2	2	0	0	2	2	0	0	0	0	2	2	0	0	2	2	0	0	0	0	0	2	2	2	2	2	0	2	2	0	2	2	0	2
IWB44942	8	1B	30.86	0	2	2	0	0	2	0	2	2	2	2	2	2	2	0	0	2	2	0	0	0	0	2	2	0	0	2	2	0	0	0	0	0	2	2	2	2	2	0	2	2	0	2	2	0	2
IWB21824	8	1B	31.42	0	2	2	0	0	2	0	2	2	2	2	2	2	2	0	0	2	2	0	0	0	0	2	2	0	0	2	2	0	0	0	0	0	2	2	2	2	2	0	2	2	0	2	2	0	2
IWB10196	8	1B	32.52	0	2	2	0	0	2	0	2	2	2	2	2	2	2	0	0	2	2	0	0	0	0	2	2	0	0	2	2	0	0	0	0	0	2	2	2	2	2	0	0	2	0	2	2	0	2
IWB61131	8	1B	33.63	0	2	2	0	0	2	0	2	2	2	2	2	2	2	0	0	2	2	0	0	0	0	2	2	0	0	2	2	0	0	0	0	0	2	2	2	2	2	0	0	2	0	2	2	0	2
IWB41967	8	1B	34.73	0	2	2	0	0	2	0	2	2	2	2	2	2	2	0	0	2	2	0	0	0	0	2	2	0	0	2	2	0	0	0	0	0	2	2	2	2	2	0	0	2	0	2	2	0	2
IWB29015	8	NA	35.84	0	2	2	0	0	2	0	2	2	2	2	0	2	2	0	0	2	2	0	0	0	0	2	2	0	0	2	2	0	0	0	0	0	2	2	2	2	2	0	0	2	0	2	2	0	2
IWB11472	8	1B	36.39	0	2	2	0	0	2	0	2	2	2	2	2	2	2	0	0	2	2	0	0	0	0	2	2	0	0	2	2	0	0	0	0	0	2	2	2	2	2	0	0	2	0	2	2	0	2
IWB27292	8	1B	36.94	0	2	2	0	0	2	0	2	2	2	2	2	2	2	0	0	2	2	0	0	0	0	2	2	0	0	2	2	0	0	0	0	0	2	2	2	2	2	0	0	2	0	2	2	0	2
IWB71192	8	1B	38.05	0	2	2	0	0	2	0	2	2	2	2	2	2	2	0	0	2	2	0	0	0	0	2	2	0	0	2	2	0	0	0	0	0	2	2	2	2	2	0	0	2	0	2	2	0	2
IWB25041	8	1B	39.15	0	2	2	0	0	2	0	2	2	2	2	2	2	2	0	0	2	2	0	0	0	0	2	2	0	0	2	2	0	0	0	0	0	2	2	2	2	2	0	0	2	0	2	2	0	2
IWB6543	8	1B	39.71	0	2	2	0	0	2	0	2	2	2	2	2	2	2	0	0	2	2	0	0	2	0	2	2	0	0	2	2	0	0	0	0	0	2	2	2	2	2	0	0	2	0	2	2	0	2
IWB13176	8	1B	39.71	0	2	2	0	0	2	0	2	2	2	2	2	2	2	0	0	2	2	0	0	2	0	2	2	0	0	2	2	0	0	0	0	0	2	2	2	2	2	0	0	2	0	2	2	0	2
IWB30074	8	1B	40.27	0	-	2	0	0	2	0	2	2	2	2	2	2	2	0	0	2	2	0	0	2	0	2	2	0	0	2	2	0	0	0	0	0	2	2	2	2	2	0	0	2	0	2	2	0	2
IWB10630	8	1B	41.38	0	2	2	0	0	2	0	2	2	2	2	2	2	2	0	0	2	2	0	0	2	0	2	2	0	0	2	2	0	0	0	0	0	2	2	0	2	2	0	0	2	0	2	2	0	2
IWB12200	8	1B	41.94	0	2	2	0	0	2	0	2	2	2	0	2	2	2	0	0	2	2	0	0	2	0	2	2	0	0	2	2	0	0	0	0	0	2	2	0	2	2	0	0	2	0	2	2	0	2
IWB35922	8	1B	42.49	0	2	2	0	0	2	0	2	2	2	0	2	2	2	0	0	2	2	0	0	2	0	2	2	0	0	2	2	0	0	0	0	0	2	2	0	2	2	0	0	2	0	2	2	0	2
IWB23428	8	1B	53.15	2	2	2	0	0	2	0	2	2	2	0	0	2	2	2	0	2	2	0	0	2	0	0	2	0	0	0	2	2	0	2	0	0	2	2	0	2	2	0	0	2	0	2	2	0	2
IWB11056	8	NA	57.58	2	0	2	0	0	2	0	2	2	2	2	0	2	2	2	0	2	2	0	0	2	0	0	2	0	0	0	2	2	0	2	0	0	2	2	0	2	2	0	0	2	0	2	2	0	2
IWB2579	8	1B	67.08	2	2	2	0	0	2	0	2	2	2	2	0	2	2	2	2	2	2	0	0	2	0	0	2	0	0	0	2	2	0	2	0	0	2	2	0	2	2	0	0	2	2	0	2	0	0
IWB9108	8	NA	68.19	2	2	2	0	0	2	0	2	2	2	2	0	2	2	2	2	2	2	0	0	2	0	0	2	0	0	0	2	2	0	2	0	0	2	2	0	2	2	0	0	2	2	0	2	0	0
IWB10318	8	1B	68.74	2	2	2	0	0	2	0	2	2	2	2	0	2	2	2	2	2	2	0	0	2	0	0	2	0	0	0	2	2	0	2	0	0	2	2	0	2	2	0	0	2	2	0	2	0	0
IWB23293	8	1B	69.29	2	2	2	0	0	2	0	2	2	2	2	0	2	2	2	2	2	2	0	0	2	0	0	2	0	0	0	2	2	0	2	0	2	2	2	0	2	2	0	0	2	2	0	2	0	0
IWB47034	8	NA	72.06	2	2	2	0	0	2	2	2	2	2	2	0	2	2	2	2	2	2	0	2	2	0	0	2	2	0	0	2	2	0	2	0	2	2	2	0	2	2	0	0	2	2	0	2	0	0
IWB57025	8	1B	72.62	-	-	2	0	0	2	2	2	2	2	2	0	2	2	2	2	2	2	0	2	2	0	0	2	2	0	0	2	2	0	2	0	2	2	2	-	2	2	0	0	2	2	0	2	0	0
IWB80823	8	1B	73.18	2	2	2	0	0	2	2	2	2	2	2	0	2	2	2	2	2	2	0	2	2	0	0	2	2	0	0	2	2	0	2	0	2	2	2	0	2	2	0	0	2	2	0	2	0	0
IWB33204	8	1B	75.98	2	2	2	0	0	2	2	2	2	2	2	0	2	2	2	2	2	2	0	2	2	0	0	2	2	0	0	2	2	0	2	0	2	2	2	0	2	2	0	0	2	2	0	2	0	0
IWB55698	8	NA	76.54	2	2	2	0	0	2	2	2	2	2	2	0	2	2	2	2	2	2	0	2	2	0	0	2	2	0	0	2	2	0	2	0	2	2	2	0	2	2	0	0	2	2	0	2	0	0
IWB26466	8	1B	80.97	2	2	2	0	0	2	2	2	2	2	2	0	2	2	2	2	2	2	0	2	2	0	0	2	2	0	0	2	2	0	0	0	2	2	2	0	2	2	0	0	2	2	0	2	0	0
IWB76618	8	1B	83.18	2	2	2	0	0	2	2	2	2	2	2	0	2	2	2	2	2	2	0	2	2	2	0	2	2	0	0	2	2	0	0	0	2	2	2	0	2	2	0	0	2	2	0	2	0	0
IWB15863	9	2Dx	0	2	2	2	0	2	2	2	2	0	2	0	0	2	0	2	0	0	0	2	0	2	2	0	2	0	2	2	2	0	0	2	2	0	2	0	2	2	2	0	0	2	0	0	2	0	0
IWB44405	9	2Dx	2.21	2	2	2	0	2	2	2	2	0	2	0	0	2	0	2	0	0	0	2	0	2	2	0	2	0	2	2	2	0	0	2	2	0	2	0	2	2	2	0	0	2	0	0	2	0	0
IWB8564	9	2B	11.72	2	2	2	2	2	2	2	2	0	2	0	0	2	0	2	0	0	0	2	0	2	2	0	2	0	2	2	2	2	0	2	0	0	2	0	2	2	2	0	0	2	0	0	2	0	0
IWB6181	9	2Dx	21.8	2	2	2	2	2	2	2	2	0	2	0	2	2	0	2	0	2	2	2	0	2	2	2	2	0	2	2	2	2	0	2	0	2	2	0	2	2	0	0	0	2	0	0	2	0	0
IWB40159	9	2Dx	21.8	2	2	2	2	2	2	2	2	0	2	0	2	2	0	2	0	2	2	2	0	2	2	2	2	0	2	2	2	2	0	2	0	2	2	0	2	2	0	0	0	2	0	0	2	0	0
IWB77671	10	5B	0	0	2	0	2	0	2	2	0	0	0	2	2	0	2	2	0	0	2	2	0	2	0	0	0	0	2	0	2	0	0	0	2	0	2	2	0	0	0	0	2	2	0	0	0	0	0
IWB74016	10	NA	2.81	0	2	0	2	0	2	2	0	0	0	2	2	0	2	2	0	0	2	2	0	2	0	0	0	0	2	0	-	0	2	0	2	0	2	2	0	0	0	0	2	2	0	0	0	2	0
IWB11015	10	5B	11.27	0	2	0	2	0	0	2	0	0	0	2	2	0	2	2	0	0	2	0	0	2	0	0	0	0	0	0	2	0	2	0	2	0	2	2	0	0	0	0	2	2	0	0	0	2	0
IWB26925	10	7B	11.82	0	2	0	2	0	0	2	0	0	0	2	2	0	2	2	0	0	2	0	0	2	0	0	0	0	0	0	2	0	2	0	2	0	2	2	0	0	0	0	2	2	0	0	0	2	0
IWB24668	10	NA	12.38	0	2	0	2	0	0	2	0	0	0	2	2	0	2	2	0	0	2	0	0	2	0	0	0	0	0	0	2	0	2	0	2	0	2	2	0	0	0	0	2	2	0	0	0	2	0
IWB10951	10	5B	12.93	0	2	0	2	0	0	2	0	0	0	2	2	0	2	2	0	0	2	0	0	2	0	0	0	0	0	0	2	0	2	0	2	0	2	2	0	0	0	0	2	2	0	0	0	2	0
IWB11219	10	NA	21.86	0	2	0	2	0	0	2	0	0	0	2	2	0	0	2	0	0	2	0	0	2	0	0	0	0	0	0	2	0	2	0	2	0	2	2	0	0	0	0	2	2	0	0	0	2	0
IWB35835	10	5B	22.42	0	2	0	2	0	0	2	0	0	0	2	2	0	0	2	0	0	2	0	0	2	0	0	0	0	0	0	2	0	2	0	2	0	2	2	0	0	0	0	2	2	0	0	0	2	0
IWB26985	10	5B	22.98	0	2	0	2	0	0	2	0	0	0	2	2	0	0	2	0	0	2	0	0	2	0	0	0	0	0	0	2	0	2	0	2	0	2	2	0	0	0	0	2	2	0	0	0	2	0
IWB77966	10	5B	25.24	0	2	0	0	0	0	2	0	0	0	2	2	0	0	2	0	0	2	0	0	2	0	0	0	0	0	0	2	0	2	0	2	0	2	2	0	0	0	0	2	2	0	0	0	2	0
IWB24361	10	5B	30.79	0	2	0	0	0	0	2	0	0	0	2	2	0	0	2	0	0	2	2	0	2	0	0	0	0	2	0	2	0	2	0	2	0	2	2	0	0	0	0	2	2	2	0	0	2	0
IWB65591	10	5B	31.89	0	2	0	0	0	0	2	0	0	0	2	2	0	0	2	0	0	2	2	0	2	0	0	0	0	2	0	2	0	2	0	2	0	2	2	0	0	0	0	2	2	2	0	0	2	0
IWB67752	10	5B	32.45	0	2	0	0	0	0	2	0	0	0	2	2	0	0	2	0	0	2	2	0	2	0	0	0	0	2	0	2	0	2	0	2	0	2	2	0	0	0	0	2	2	2	0	0	2	0
IWB10401	10	5B	33.55	0	2	0	0	0	0	2	0	0	0	2	2	0	0	2	0	0	2	2	0	2	0	0	0	0	2	0	2	0	2	0	2	2	2	2	0	0	0	0	2	2	2	0	0	2	0
IWB12232	10	5B	36.32	0	2	0	0	0	0	2	0	0	0	2	2	0	0	2	0	0	2	2	0	2	0	0	0	0	2	0	2	0	2	0	2	2	2	2	0	0	0	0	0	2	2	0	0	2	0
IWB35477	10	5B	39.08	0	2	0	0	0	0	2	0	0	0	2	2	0	0	2	0	2	2	2	0	0	0	0	0	0	2	0	2	0	2	0	2	2	2	2	0	0	0	0	2	2	2	0	0	2	0
IWB47574	10	5B	40.2	0	2	0	0	0	0	2	0	0	0	2	2	0	0	2	0	2	2	2	0	0	0	0	0	0	2	0	2	0	2	0	2	2	2	2	0	0	0	0	2	2	2	0	0	2	0
IWB2049	10	5B	40.76	0	2	0	0	0	0	2	0	0	0	2	2	0	0	2	0	2	2	2	0	0	0	0	0	0	2	0	2	0	2	0	2	2	2	2	0	0	0	0	2	2	2	0	0	2	0
IWB10948	10	5B	45.19	0	2	0	0	0	0	2	2	0	0	2	2	2	0	2	0	2	2	2	0	0	0	0	2	0	2	0	2	0	2	0	2	2	2	2	0	0	0	0	2	2	2	0	2	2	0
IWB59030	10	5B	46.3	0	2	0	0	0	0	2	2	0	0	2	2	2	0	2	0	2	2	2	0	0	0	0	2	0	2	0	2	0	2	0	2	2	2	2	0	0	0	0	2	2	2	0	2	2	0
IWB61247	10	5B	49.62	0	2	0	0	0	0	2	2	0	0	2	2	2	0	2	0	2	2	2	0	0	0	0	2	0	2	0	2	0	2	0	2	2	2	2	0	0	0	0	2	2	2	0	2	2	0
IWB11032	10	5B	50.17	0	2	0	0	0	0	2	2	0	0	2	2	2	0	2	0	2	2	2	0	0	0	0	2	0	2	0	2	0	2	0	2	2	2	2	0	0	0	0	2	2	2	0	2	2	0
IWB10888	10	7B	51.27	0	2	0	0	0	0	2	2	0	0	2	2	2	0	2	0	2	2	2	0	0	0	0	2	0	2	0	2	0	2	0	2	2	2	2	0	0	0	0	2	2	2	0	2	2	0
IWB8116	10	5B	54.59	0	2	0	0	0	0	2	2	0	0	2	2	2	0	0	0	2	2	2	0	0	0	0	2	0	2	0	2	0	2	0	2	2	2	2	2	0	0	0	2	2	2	0	2	2	0
IWB60833	10	6A	57.91	0	2	0	0	0	0	2	2	2	0	0	2	2	0	0	0	2	2	2	0	0	0	0	2	0	2	0	2	0	2	0	2	2	2	2	2	0	0	0	2	2	2	0	2	2	0
IWB44014	10	5B	58.47	0	2	0	0	0	0	2	2	2	0	0	2	2	0	0	0	2	2	2	0	0	0	0	2	0	2	0	2	0	2	0	2	2	2	2	2	0	0	0	2	2	2	0	2	2	0
IWB26172	10	5B	58.47	0	2	0	0	0	0	2	2	2	0	0	2	2	0	0	0	2	2	2	0	0	0	0	2	0	2	0	2	0	2	0	2	2	2	2	2	0	0	0	2	2	2	0	2	2	0
IWB58867	10	5B	59.58	0	2	0	0	0	0	2	2	2	0	0	2	2	0	0	0	2	2	2	0	0	0	0	2	0	2	0	2	0	2	0	2	2	2	2	2	0	0	0	2	2	2	0	2	2	0
IWB23277	10	5B	68.52	0	2	0	0	0	0	0	2	2	0	0	2	2	0	0	0	2	2	2	0	0	0	0	2	0	2	0	2	0	2	0	2	2	2	2	2	0	2	2	2	2	2	0	2	2	0
IWB22084	10	5B	69.62	0	2	0	0	0	0	0	2	2	0	0	2	2	0	0	0	2	2	2	0	0	0	0	2	0	2	0	2	0	2	0	2	2	2	2	2	0	2	2	2	2	2	0	2	2	0
IWB30419	10	5B	70.17	0	2	0	0	0	0	0	2	2	0	0	2	2	0	0	0	2	2	2	0	0	0	0	2	0	2	0	2	0	2	0	2	2	2	2	2	0	2	2	2	2	2	0	2	2	0
IWB22600	10	NA	70.73	0	2	0	0	2	0	0	2	2	0	0	2	2	0	0	0	2	2	2	0	0	0	0	2	0	2	0	2	0	2	0	2	2	2	2	2	0	2	2	2	2	2	0	2	2	0
IWB13513	10	3B	71.28	0	2	0	0	2	0	0	2	2	0	0	2	2	0	0	0	2	2	2	0	0	0	0	2	0	2	0	2	0	2	0	2	2	2	2	2	0	2	2	2	2	2	0	2	2	0
IWB25562	10	5B	72.38	0	2	0	0	2	0	0	2	2	0	0	2	2	0	0	0	2	2	2	0	0	0	0	2	0	2	0	2	0	2	0	2	2	2	2	2	0	2	2	2	2	2	0	2	2	0
IWB29637	10	5B	72.94	0	2	0	0	2	0	0	2	2	2	0	2	2	0	0	0	2	2	2	0	0	0	0	2	0	2	0	2	0	2	0	2	2	2	2	2	0	2	2	2	2	2	0	2	2	0
IWB12515	10	5B	73.49	0	2	0	0	2	0	2	2	2	2	0	2	2	0	0	0	2	2	2	0	0	0	0	2	0	2	0	2	0	2	0	2	2	2	2	2	0	2	2	2	2	2	0	2	2	0
IWB48330	10	5B	74.59	0	2	0	0	2	0	2	2	2	2	0	2	2	0	0	0	2	2	2	0	0	0	0	2	0	2	0	2	0	2	0	2	2	2	2	2	0	2	2	2	2	2	0	2	2	0
IWB21390	10	5B	75.15	0	2	0	0	2	0	2	2	2	2	0	2	2	0	0	0	2	2	2	0	0	0	0	2	0	2	0	2	0	2	0	2	2	2	2	2	0	2	2	2	2	2	0	2	2	0
IWB45568	10	5B	75.7	0	2	0	0	2	0	2	2	2	2	0	2	2	0	0	0	2	2	2	0	0	0	0	2	0	2	0	2	0	2	0	2	2	2	2	2	0	2	2	2	2	2	0	2	2	0
IWB11131	10	NA	76.26	0	2	0	0	2	0	2	2	2	2	0	2	2	0	0	0	2	2	2	0	0	0	0	2	0	2	0	2	0	2	0	2	2	2	2	2	0	2	2	2	2	2	0	2	2	0
IWB43768	10	NA	76.81	0	2	0	0	2	0	2	2	2	2	0	2	2	0	0	0	2	2	2	0	0	0	0	2	0	2	0	2	0	2	0	2	2	2	2	2	0	2	2	2	2	2	0	2	2	0
IWB65348	10	5B	81.27	2	2	0	0	2	0	2	2	2	0	0	2	2	0	0	0	2	2	2	0	0	0	0	2	0	2	0	0	0	2	0	2	2	2	2	2	0	2	2	2	2	2	0	2	2	0
IWB14635	10	5B	85.72	2	0	0	0	2	0	2	2	2	0	0	2	2	0	0	0	2	2	2	0	0	0	0	2	0	2	0	0	0	2	0	2	2	0	2	2	0	0	2	2	2	2	0	2	0	0
IWB11813	10	5B	86.28	2	0	0	0	2	0	2	2	2	0	0	0	2	0	0	0	2	2	2	0	0	0	0	2	0	2	0	0	0	2	0	2	2	0	2	2	0	0	2	2	2	2	0	2	0	0
IWB23537	10	5B	89.04	2	0	0	0	2	0	2	2	2	0	0	0	2	0	0	0	2	2	2	0	0	0	0	2	0	2	0	0	0	2	0	2	2	0	2	2	0	0	2	2	2	2	0	2	0	0
IWB66975	10	NA	89.6	2	0	0	0	2	0	2	2	2	0	0	0	2	0	0	0	2	2	2	0	0	0	0	2	0	2	0	0	0	2	0	2	2	0	2	2	0	0	2	2	2	2	0	2	0	2
IWB54191	10	5B	90.71	2	0	0	0	2	0	2	2	2	0	0	0	2	0	0	0	2	2	2	0	0	0	0	2	0	2	0	0	0	2	0	2	2	0	2	2	0	0	2	2	2	2	0	2	0	2
IWB10356	10	5B	91.81	2	0	0	0	2	0	2	2	2	0	0	0	2	0	0	0	2	2	2	0	0	0	0	2	0	2	0	0	0	2	0	2	2	0	2	2	0	0	2	2	2	2	0	2	0	2
IWB68594	10	NA	92.36	2	0	0	0	2	0	2	2	2	0	0	0	2	0	0	0	2	2	2	0	0	0	0	2	0	2	0	0	0	2	0	2	2	0	2	2	0	0	2	2	2	2	0	2	0	2
IWB23949	10	5B	93.47	2	0	0	0	2	0	2	2	2	0	0	0	2	0	0	0	2	2	2	0	0	0	0	2	0	2	0	0	0	2	0	2	2	0	2	2	0	0	2	2	2	2	0	2	0	2
IWB20439	10	5B	94.02	2	0	0	0	2	0	2	2	2	0	0	0	2	0	0	0	2	2	2	0	0	0	0	2	0	2	0	0	0	2	0	2	2	0	2	2	0	0	2	2	2	2	0	2	0	2
IWB25366	10	5B	94.58	2	0	0	0	2	0	2	2	2	0	0	0	2	0	0	0	2	2	2	0	0	0	0	2	0	2	0	0	0	2	0	2	2	0	2	2	0	0	2	2	2	2	0	2	0	2
IWB1272	10	NA	95.68	2	0	0	0	2	0	2	2	2	0	0	0	2	0	0	0	2	2	2	0	0	0	0	2	0	2	0	0	0	2	0	2	2	0	2	2	0	0	2	2	2	2	0	2	0	2
IWB72812	10	NA	96.23	2	0	0	0	2	0	2	2	2	0	0	0	2	0	0	0	2	2	2	0	0	0	0	2	0	2	0	0	0	2	0	2	2	0	2	2	0	0	2	2	2	2	0	2	0	2
IWB57781	10	NA	138.16	0	0	0	0	2	0	0	2	0	0	0	0	2	0	0	0	2	2	0	0	0	0	0	2	0	0	0	2	0	0	0	2	2	0	2	0	0	0	2	0	0	0	0	2	2	0
IWB36680	11	7A	0	0	0	0	2	2	0	0	2	0	2	0	0	2	0	0	0	2	2	0	2	2	0	2	2	2	0	0	2	2	0	0	2	2	0	2	0	2	0	2	0	0	0	2	2	2	0
IWB42308	11	NA	1.11	0	0	0	2	2	0	0	2	0	2	0	0	2	0	0	0	2	2	0	2	2	0	2	2	2	0	0	2	2	0	0	2	2	0	2	0	2	0	2	0	0	0	2	2	2	0
IWB27946	11	7A	3.33	0	0	0	2	2	0	0	2	0	2	0	0	2	0	0	0	2	2	0	2	2	0	2	2	2	0	0	2	0	0	0	2	2	0	2	0	2	0	0	0	0	0	2	2	2	0
IWB25012	11	7D	9.47	0	2	0	0	2	2	0	2	0	2	0	0	2	0	0	0	2	2	0	2	2	2	2	2	2	0	0	2	0	0	0	2	2	2	2	0	2	0	0	0	0	0	2	2	2	0
IWB11672	11	7B	10.02	0	2	0	0	2	2	0	2	0	2	0	0	2	0	0	0	2	2	0	2	2	2	2	2	2	0	0	2	0	0	0	2	2	2	2	0	2	0	0	0	0	0	2	2	2	0
IWB6146	11	7B	10.58	0	2	0	0	2	2	0	2	0	2	0	0	2	0	0	0	2	2	0	2	2	2	2	2	2	0	0	2	0	0	0	2	2	2	2	0	2	0	0	0	0	0	2	2	2	0
IWB23037	11	7A	11.13	0	2	0	0	2	2	0	2	0	2	0	0	2	0	0	0	2	2	0	2	2	2	2	2	2	0	0	2	0	0	0	2	2	2	2	0	2	0	0	0	0	0	2	2	2	0
IWB47016	11	7A	11.68	0	2	0	0	2	2	0	2	0	2	0	0	2	0	0	0	2	2	0	2	2	2	2	2	2	0	0	2	0	0	0	2	2	2	2	0	2	0	0	0	0	0	2	2	2	0
IWB41336	11	7A	12.24	0	2	0	0	2	2	0	2	0	2	0	0	2	0	0	0	2	2	0	2	2	2	2	2	2	0	0	2	0	0	0	2	2	2	2	0	2	0	0	0	0	0	2	2	2	0
IWB65210	11	7A	12.79	0	2	0	0	2	2	0	2	0	2	0	0	2	0	0	0	2	2	0	2	2	2	2	2	2	0	0	2	0	0	0	2	2	2	2	0	2	0	0	0	0	0	2	2	2	0
IWB27011	11	7A	14.45	0	2	0	0	2	2	0	2	0	2	0	0	2	0	0	0	2	2	0	2	2	2	2	2	2	0	0	2	0	0	0	2	2	2	2	0	2	0	0	0	0	0	2	2	2	0
IWB77256	11	7A	15	0	2	0	0	2	2	0	2	0	2	0	0	2	0	0	0	2	2	0	2	2	2	2	2	2	0	0	2	0	0	0	2	2	2	2	0	2	0	0	0	0	0	2	2	2	0
IWB69977	11	NA	17.21	0	2	0	0	2	2	0	2	0	2	0	0	2	0	0	0	2	2	0	2	0	2	2	2	2	0	0	2	0	0	0	2	2	2	2	0	2	0	0	0	0	0	2	2	2	0
IWB79005	11	7A	18.32	0	2	0	0	2	2	0	2	0	2	0	0	2	0	0	0	2	2	0	2	0	2	2	2	2	0	0	2	0	0	0	2	2	2	2	0	2	0	0	0	0	0	2	2	2	0
IWB34242	11	NA	18.87	0	2	0	0	2	2	0	2	0	2	0	0	2	0	0	0	2	2	0	2	0	2	2	2	2	0	0	2	0	0	0	2	2	2	2	0	2	0	0	0	0	0	2	2	2	0
IWB8722	11	7A	21.64	0	2	0	0	2	2	0	2	0	2	0	0	2	0	0	0	2	2	0	0	0	2	0	2	0	0	0	2	0	0	0	2	2	2	2	0	2	0	0	0	0	0	2	2	2	0
IWB28062	11	7A	22.19	0	2	0	0	2	2	0	2	0	2	0	0	2	0	0	0	2	2	0	0	0	2	0	2	0	0	0	2	0	0	0	2	2	2	2	0	2	0	0	0	0	0	2	2	2	0
IWB10927	11	2A	22.74	0	2	0	0	2	2	0	2	0	2	0	0	2	0	0	0	2	2	0	0	0	2	0	2	0	0	0	2	0	0	0	2	2	2	2	0	2	0	0	0	0	0	2	2	2	0
IWB78570	11	7A	23.85	0	2	0	0	2	2	0	2	0	2	0	0	2	0	0	0	2	2	0	0	0	2	0	2	0	0	0	2	0	0	0	2	2	2	2	0	2	0	0	0	0	0	2	2	2	0
IWB47768	11	NA	24.4	0	2	0	0	2	2	0	2	0	2	0	0	2	0	0	0	2	2	0	0	0	2	0	2	0	0	0	2	0	0	0	2	2	2	2	0	2	0	0	0	0	0	2	2	2	0
IWB29243	11	NA	26.06	0	2	0	0	2	2	0	2	0	2	0	0	2	0	0	0	2	2	0	0	0	2	0	2	0	0	0	0	0	0	0	2	2	2	2	0	2	0	0	0	0	0	2	2	2	0
IWB12587	11	7A	28.27	0	2	0	0	2	2	0	2	0	2	0	0	2	0	0	0	2	2	0	0	0	2	0	2	0	0	0	0	0	0	0	2	2	2	2	0	2	0	0	0	0	0	2	2	2	0
IWB2539	11	7A	28.82	0	2	0	0	2	2	0	2	0	2	0	0	2	0	0	0	2	2	0	0	0	2	0	2	0	0	0	0	0	0	0	2	2	2	2	0	2	0	0	0	0	0	2	2	2	0
IWB5879	11	7A	29.93	0	2	0	0	2	2	0	2	0	2	0	0	2	0	0	0	2	2	0	0	0	2	0	2	0	0	0	0	0	0	0	2	2	2	2	0	2	0	0	0	0	0	2	2	2	0
IWB11163	11	7A	30.48	0	2	0	0	2	2	0	2	0	2	0	0	2	0	0	0	2	2	0	0	0	2	0	2	0	0	0	0	0	0	0	2	2	2	2	0	2	0	0	0	0	0	2	2	2	0
IWB11121	11	7A	31.58	0	2	0	0	2	2	0	2	0	2	0	0	2	0	0	0	2	2	0	0	0	2	0	2	0	0	0	0	0	0	0	2	2	2	2	0	2	0	0	0	0	0	2	2	2	0
IWB1390	11	7A	32.69	0	2	0	0	2	2	0	2	0	2	0	0	2	0	0	0	2	2	0	0	0	2	0	2	0	0	0	0	0	0	0	2	2	2	2	0	2	0	0	0	0	0	2	2	2	0
IWB10544	11	7A	33.24	0	2	0	0	2	2	0	2	0	2	0	0	2	0	0	0	2	2	0	0	0	2	0	2	0	0	0	0	0	0	0	2	2	2	2	0	2	0	0	0	0	0	2	2	2	0
IWB34223	11	7A	34.36	0	2	0	0	2	2	0	2	0	2	0	0	2	0	0	0	2	2	0	0	0	2	0	2	0	0	0	0	0	0	0	2	2	2	2	0	2	0	0	0	0	0	2	2	2	0
IWB49784	11	7A	34.36	0	2	0	0	2	2	0	2	0	2	0	0	2	0	0	0	2	2	0	0	0	2	0	2	0	0	0	0	0	0	0	2	2	2	2	0	2	0	0	0	0	0	2	2	2	0
IWB28537	11	NA	49.23	0	2	2	0	2	2	2	2	0	2	0	0	2	0	2	0	2	2	0	0	0	2	0	2	0	0	0	0	0	0	0	2	2	2	2	0	2	0	0	2	0	0	2	2	2	2
IWB53698	11	7B	51.44	0	2	2	0	2	2	2	2	0	2	0	0	2	0	2	0	2	2	0	0	0	2	0	2	0	0	0	0	0	0	0	2	2	2	2	0	2	0	0	2	0	0	2	2	2	2
IWB22978	11	7B	51.99	0	2	2	0	2	2	2	2	0	2	0	0	2	0	2	0	2	2	0	0	0	2	0	2	0	0	0	0	0	0	0	2	2	2	2	0	2	0	0	2	0	0	2	2	2	2
IWB11220	11	NA	52.55	0	2	2	0	2	2	2	2	0	2	0	0	2	0	2	0	2	2	0	0	0	2	0	2	0	0	0	0	0	0	0	2	2	2	2	0	2	0	0	2	0	0	2	2	2	2
IWB10210	12	5A	0	2	0	0	2	2	0	2	0	0	0	0	0	0	0	0	0	0	0	0	2	0	0	2	0	2	0	0	0	0	2	0	2	2	0	0	0	2	0	0	2	2	2	0	0	2	0
IWB11709	12	NA	4.99	2	0	0	0	2	0	2	0	0	0	0	0	0	0	0	0	0	0	0	2	0	0	2	0	2	0	0	0	0	2	0	2	2	0	0	0	2	2	0	2	2	2	0	0	2	0
IWB47425	12	5B	5.54	2	0	0	0	2	0	2	0	0	0	0	0	0	0	0	0	0	0	0	2	0	0	2	0	2	0	0	0	0	2	0	2	2	0	0	0	2	2	0	2	2	2	0	0	2	0
IWB3651	12	NA	6.09	2	0	0	0	2	0	2	0	0	0	0	0	0	0	0	0	0	0	0	2	0	0	2	0	2	0	0	0	0	2	0	2	2	0	0	0	2	2	0	2	2	2	0	0	2	0
IWB10201	12	5B	9.41	2	0	0	0	2	0	2	0	0	0	0	0	0	0	0	0	0	0	0	2	0	0	2	0	2	0	0	0	0	2	0	2	2	0	0	0	2	2	0	2	2	2	0	0	2	0
IWB8858	12	NA	18.92	2	0	0	0	2	0	2	2	0	0	0	0	2	0	0	0	0	0	0	2	0	0	2	2	2	0	0	0	0	2	0	2	2	0	0	0	2	2	0	2	2	2	0	2	0	0
IWB11318	12	5B	19.47	2	0	0	0	2	0	2	2	0	0	0	0	2	0	0	0	0	0	0	2	0	0	2	2	2	0	0	0	0	2	0	2	2	0	0	0	2	2	0	2	2	2	0	2	0	0
IWB2028	12	5B	20.02	2	0	0	0	2	0	2	2	0	0	0	0	2	0	0	0	0	0	0	2	0	0	2	2	2	0	0	0	0	2	0	2	2	0	0	0	2	2	0	2	2	2	0	2	0	0
IWB10994	12	5B	23.9	2	0	0	0	2	0	2	2	0	0	0	0	2	0	0	0	0	0	0	2	0	0	2	2	2	0	0	0	0	2	0	2	2	0	0	0	2	2	0	2	2	2	0	2	0	0
IWB11024	12	7B	24.45	2	0	0	0	2	0	2	2	0	0	0	0	2	0	0	0	0	0	0	2	0	0	2	2	2	0	0	0	0	2	0	2	2	0	0	0	2	2	0	2	2	2	0	2	0	0
IWB10125	12	5B	28.33	2	0	0	0	2	0	2	2	0	0	0	0	2	0	0	0	0	0	0	2	0	0	2	2	2	0	0	0	0	2	0	2	2	0	0	0	2	0	0	2	2	2	0	2	0	0
IWB21137	12	5B	30.54	2	0	0	0	2	0	2	2	0	0	0	0	2	0	0	0	0	2	0	2	0	0	2	2	2	0	2	0	0	2	0	2	2	0	0	0	2	0	0	2	2	2	0	2	0	0
IWB23035	12	5A	31.09	2	0	0	0	2	0	2	2	0	0	0	0	2	0	0	0	0	2	0	2	0	0	2	2	2	0	2	0	0	2	0	2	2	0	0	0	2	0	0	2	2	2	0	2	0	0
IWB26368	12	5B	33.86	2	0	0	0	2	0	2	2	0	0	0	0	2	0	0	0	0	2	0	2	0	0	2	2	2	0	2	0	0	2	0	2	2	0	0	0	0	0	0	2	2	2	0	2	0	0
IWB4335	12	5B	35.51	2	0	0	0	2	0	2	2	2	0	0	0	2	0	0	0	0	2	0	2	0	0	2	2	2	0	2	0	0	2	0	2	2	0	0	0	0	0	0	2	2	2	0	2	0	0
IWB12786	12	5B	36.07	2	0	0	0	2	0	2	2	2	0	0	0	2	0	0	0	0	2	0	2	0	0	2	2	2	0	2	0	0	2	0	2	2	0	0	0	0	0	0	2	2	2	0	2	0	0
IWB22465	12	5B	39.94	2	0	0	0	2	0	2	2	2	0	0	0	2	0	0	0	0	2	0	2	0	0	2	2	2	0	2	0	0	2	0	2	2	0	0	0	0	0	2	2	2	2	0	2	0	0
IWB10350	12	5B	42.71	2	0	0	0	2	0	2	2	2	0	0	0	2	0	0	0	0	2	0	0	0	0	2	2	0	0	2	0	0	2	0	2	2	0	0	0	0	0	2	2	2	2	0	2	0	0
IWB27933	12	5B	44.36	0	0	0	0	2	0	2	2	2	0	0	0	2	0	0	0	2	2	0	0	0	0	2	2	0	0	2	0	0	2	0	2	2	0	0	0	0	0	2	2	2	2	0	2	0	0
IWB10728	12	5B	46.58	0	0	0	0	2	0	2	2	2	0	0	0	2	0	0	0	2	2	0	0	0	0	2	2	0	0	2	0	0	2	0	2	2	0	0	0	0	0	2	2	2	2	0	2	0	0
IWB10225	12	5B	47.13	0	0	0	0	2	0	2	2	2	0	0	0	2	0	0	0	2	2	0	0	0	0	2	2	0	0	2	0	0	2	0	2	2	0	0	0	0	0	2	2	2	2	0	2	0	0
IWB34644	12	5B	48.23	0	0	0	0	2	0	2	2	2	0	0	0	2	0	0	0	2	2	0	0	0	0	2	2	0	0	2	0	0	2	0	2	2	0	0	0	0	0	2	2	2	2	0	2	0	0
IWB19676	12	5B	49.89	0	0	0	0	2	0	2	2	2	0	0	0	2	0	0	0	2	2	0	0	0	0	2	2	0	0	2	0	0	2	0	2	2	0	0	0	0	0	2	2	2	2	0	2	0	0
IWB3364	12	5A	51.55	0	0	0	0	2	0	2	2	2	0	0	0	2	0	0	0	2	2	0	0	0	0	2	2	0	0	2	0	0	2	0	2	2	0	0	0	0	0	2	2	2	2	0	2	0	0
IWB15223	12	5B	52.66	0	0	0	0	2	0	2	2	2	0	0	0	2	0	0	0	2	2	0	0	0	0	2	2	0	0	2	0	0	2	0	2	2	0	0	0	0	0	2	2	2	2	0	2	0	0
IWB10259	12	5B	53.21	0	0	0	0	2	0	2	2	2	0	0	0	2	0	0	0	2	2	0	0	0	0	2	2	0	0	2	0	0	2	0	2	2	0	0	0	0	0	2	2	2	2	0	2	0	0
IWB49639	12	3B	57.17	0	0	0	0	2	0	2	2	2	0	0	0	2	0	0	0	2	2	0	0	0	0	2	2	0	0	2	0	0	2	0	2	2	0	0	0	0	0	2	2	2	2	0	2	0	0
IWB59522	12	NA	61.13	0	0	0	0	2	0	2	2	2	0	0	0	2	0	0	0	2	2	0	0	0	0	2	2	0	0	2	0	0	2	0	2	2	0	0	0	0	0	2	2	2	2	0	2	0	0
IWB10299	12	5B	68.37	0	0	0	0	2	0	2	2	2	0	0	0	2	0	0	0	2	2	0	0	0	0	2	2	0	0	2	0	0	2	0	2	2	0	0	0	0	0	2	2	2	2	0	2	0	0
IWB65647	12	5B	68.92	0	0	0	0	2	0	2	2	2	0	0	0	2	0	0	0	2	2	0	0	0	0	2	2	0	0	2	0	0	2	0	2	2	0	0	0	0	0	2	2	2	2	0	2	0	0
IWB5389	12	5B	70.02	0	0	0	0	2	0	2	2	2	0	0	0	2	0	0	0	2	2	0	0	0	0	2	2	0	0	2	0	0	2	0	2	2	0	0	0	0	0	2	2	2	2	0	2	0	0
IWB75413	12	5B	70.58	0	0	0	0	2	0	2	2	2	0	0	0	2	0	0	0	2	2	0	0	0	0	2	2	0	0	2	0	0	2	0	2	2	0	0	0	0	0	2	2	2	2	0	2	0	0
IWB45956	12	5B	71.13	0	0	0	0	2	0	2	2	2	0	0	0	2	0	0	0	2	2	0	0	0	0	2	2	0	0	2	0	0	2	0	2	2	0	0	2	0	0	2	2	2	2	0	2	0	0
IWB10467	12	5B	72.23	2	0	0	0	2	0	2	2	2	0	0	0	2	0	0	0	2	2	0	0	0	0	2	2	0	0	2	0	0	2	0	2	2	0	0	2	0	0	2	2	2	2	0	2	0	0
IWB70815	12	5B	73.89	2	0	0	0	2	0	2	2	2	0	0	0	2	0	0	0	2	2	2	0	0	0	2	2	0	2	2	0	0	2	0	2	2	0	2	2	0	0	2	2	2	2	0	2	0	0
IWB59618	12	5B	75	2	0	0	0	2	0	2	2	2	0	0	0	2	0	0	0	2	2	2	0	0	0	2	2	0	2	2	0	0	2	0	2	2	0	2	2	0	0	2	2	2	2	0	2	0	0
IWB41999	12	NA	76.1	2	0	0	0	2	0	2	2	2	0	0	0	2	0	0	0	2	2	2	0	0	0	2	2	0	2	2	0	0	2	0	2	2	0	2	2	0	0	2	2	2	2	0	2	0	0
IWB19921	12	5B	76.65	2	0	0	0	2	0	2	2	2	0	0	0	2	0	0	0	2	2	2	0	0	0	2	2	0	2	2	0	0	2	0	2	2	0	2	2	0	0	2	2	2	2	0	2	0	0
IWB10385	12	NA	77.21	2	0	0	0	2	0	2	2	2	0	0	0	2	0	0	0	2	2	2	0	0	0	2	2	0	2	2	0	0	2	0	2	2	0	2	2	0	0	2	2	2	2	0	2	0	0
IWB47848	12	5B	82.2	2	0	0	0	2	0	2	0	2	0	0	0	0	0	0	0	2	2	2	0	0	0	2	0	0	2	2	0	0	2	0	2	2	0	2	2	0	0	2	2	2	2	0	0	0	0
IWB1974	12	NA	88.3	2	0	0	0	2	0	2	0	2	0	0	0	0	0	0	0	2	2	2	0	0	0	0	0	0	2	0	0	0	2	0	2	2	0	2	2	0	0	2	2	2	2	0	0	0	0
IWB73416	12	5B	91.66	2	0	0	0	2	0	2	0	2	0	0	0	0	0	0	0	2	2	-	0	0	0	0	0	0	2	0	0	0	2	0	2	2	0	2	2	0	0	2	2	2	2	0	0	0	0
IWB36579	12	5B	92.22	2	0	0	0	2	0	2	0	2	0	0	0	0	0	0	0	2	2	2	0	0	0	0	0	0	2	0	0	0	2	0	2	2	0	2	2	0	0	2	2	2	2	0	0	0	0
IWB626	12	5B	93.89	2	0	0	0	2	0	2	0	2	0	0	0	0	0	0	0	2	2	2	0	0	0	0	0	0	2	0	0	0	2	0	2	2	0	2	2	0	0	2	2	2	2	0	0	0	0
IWB10247	12	5B	96.1	2	0	0	0	2	0	2	0	2	0	0	0	0	0	0	0	2	2	2	0	0	0	0	0	0	2	0	0	0	2	0	2	2	0	2	2	0	0	2	2	2	2	0	0	0	0
IWB36055	12	5B	96.65	2	0	0	0	2	0	2	0	2	0	0	0	0	0	0	0	2	2	2	0	0	0	0	0	0	2	0	0	0	2	0	2	2	0	2	2	0	0	2	2	2	2	0	0	0	0
IWB21615	12	5B	97.21	2	0	0	0	2	0	2	0	2	0	0	0	0	0	0	0	2	2	2	0	0	0	0	0	0	2	0	0	0	2	0	2	2	0	2	2	0	0	2	2	2	2	0	0	0	0
IWB30277	12	NA	98.92	2	0	0	0	-	0	2	0	2	0	0	0	0	0	0	0	2	2	2	0	0	0	0	0	0	2	0	0	0	2	-	2	2	0	2	2	0	0	2	2	2	2	0	0	0	2
IWB9959	12	5B	99.49	2	0	0	0	2	0	2	0	2	0	0	0	0	0	0	0	2	2	2	0	0	0	0	0	0	2	0	0	0	2	0	2	2	0	2	2	0	0	2	2	2	2	0	0	0	2
IWB44310	12	5B	101.77	-	0	0	0	2	0	2	0	2	0	0	0	0	0	0	0	2	2	2	0	0	0	0	0	0	2	0	-	0	2	0	2	2	0	2	2	0	0	2	2	2	2	0	0	0	2
IWB47556	12	5B	103.48	2	0	0	0	2	0	2	0	2	0	0	0	0	0	0	0	2	2	2	0	0	0	0	0	0	2	0	0	0	2	0	2	2	0	2	2	0	0	2	2	2	2	0	0	0	2
IWB54382	12	5A	106.82	2	0	0	0	2	0	2	0	2	0	0	0	0	0	0	0	2	2	2	0	0	0	0	0	0	2	0	0	0	2	0	2	2	0	2	2	0	0	2	2	2	2	0	0	0	2
IWB11817	12	5B	107.37	2	0	0	0	2	0	2	0	2	0	0	0	0	0	0	0	2	2	2	0	0	0	0	0	0	2	0	0	0	2	0	2	2	0	2	2	0	0	2	2	2	2	0	0	0	2
IWB35312	12	NA	108.48	2	0	0	0	2	0	2	0	2	0	0	0	0	0	0	0	2	2	2	0	0	0	0	0	0	2	0	0	0	2	0	2	2	0	2	2	0	0	2	2	2	2	0	0	0	2
IWB35880	12	NA	109.58	2	0	0	0	2	0	2	0	2	0	0	0	0	0	0	0	2	2	2	0	0	0	0	0	0	2	0	0	0	2	0	2	2	0	2	2	0	0	2	2	2	2	0	0	0	2
IWB19792	12	5B	110.14	2	0	0	0	2	0	2	0	2	0	0	0	0	0	0	0	2	2	2	0	0	0	0	0	0	2	0	0	0	2	0	2	2	0	2	2	0	0	2	2	2	2	0	0	0	2
IWB73722	13	NA	0	0	2	0	0	2	0	0	0	0	0	0	2	0	0	0	2	0	0	2	0	0	0	0	0	0	2	0	0	2	0	0	2	2	2	0	0	0	2	0	0	2	0	0	0	0	0
IWB73283	13	7A	22.38	0	0	0	0	2	2	0	0	0	0	0	2	0	0	0	0	0	0	0	0	2	2	0	0	0	0	0	0	2	0	0	0	2	0	0	0	0	2	0	0	2	0	0	0	0	0
IWB10976	13	7A	41.49	2	2	0	0	2	2	0	0	2	0	0	2	0	0	0	2	0	2	2	0	2	2	0	0	0	2	0	2	2	2	0	2	2	2	0	0	0	2	0	0	2	0	0	0	0	0
IWB42938	13	4A	42.04	2	2	0	0	2	2	0	0	2	0	0	2	0	0	0	2	0	2	2	0	2	2	0	0	0	2	0	2	2	2	0	2	2	2	0	0	0	2	0	0	2	0	0	0	0	0
IWB12297	13	7A	43.15	2	2	0	0	2	2	0	0	2	0	0	2	0	0	0	2	0	2	2	0	2	2	0	0	0	2	0	2	2	2	0	2	2	2	0	0	0	2	0	0	2	0	0	0	0	0
IWB74482	13	7A	52.08	2	2	0	0	2	2	0	0	2	0	0	2	0	0	0	2	0	2	2	2	2	2	0	0	2	2	0	2	2	0	0	2	2	2	0	0	0	2	0	0	2	0	0	0	0	0
IWB71949	13	7A	54.29	0	2	0	0	2	2	0	0	2	0	0	2	0	0	0	2	0	2	2	2	2	2	0	0	2	2	0	2	2	0	0	2	2	2	0	0	0	2	0	0	0	0	0	0	0	0
IWB61648	13	7A	55.95	0	2	0	0	2	2	0	0	2	0	0	2	0	0	0	2	0	2	2	2	2	2	0	0	2	2	0	2	2	0	0	2	2	2	0	0	0	2	0	0	0	0	0	0	0	0
IWB10368	13	7A	56.5	0	2	0	0	2	2	0	0	2	0	0	2	0	0	0	2	0	2	2	2	2	2	0	0	2	2	0	2	2	0	0	2	2	2	0	0	0	2	0	0	0	0	0	0	0	0
IWB11685	13	7A	59.82	0	2	0	0	2	2	0	0	2	0	0	2	0	0	0	2	2	2	2	2	2	0	0	0	2	2	0	2	2	0	0	2	2	2	0	0	0	2	0	0	0	0	0	0	0	0
IWB10945	13	NA	62.59	0	2	0	0	2	2	0	0	2	0	0	2	0	0	0	2	2	2	2	2	2	0	0	0	2	2	0	2	2	2	0	2	2	2	0	0	0	2	0	0	0	0	0	0	0	0
IWB10153	13	1B	64.25	0	2	0	0	2	2	0	0	2	0	0	2	0	0	0	2	2	2	2	2	2	0	0	0	2	2	0	2	2	2	0	2	2	2	0	0	0	2	0	0	0	0	0	0	0	0
IWB62771	13	7A	65.35	0	2	0	0	2	2	0	0	2	0	0	2	0	0	0	2	2	2	2	2	2	0	0	0	2	2	0	2	2	2	0	2	2	2	0	0	0	2	0	0	0	0	0	0	0	0
IWB10274	13	NA	65.9	0	2	0	0	2	2	0	0	2	0	0	2	0	0	0	2	2	2	2	2	2	0	0	0	2	2	0	2	2	2	0	2	2	2	0	0	0	2	0	0	0	0	0	0	0	0
IWB11153	13	7A	66.46	0	2	0	0	2	2	0	0	2	0	0	2	0	0	0	2	2	2	2	2	2	0	0	0	2	2	0	2	2	2	0	2	2	2	0	0	0	2	0	0	0	0	0	0	0	0
IWB33972	13	7D	67.56	0	0	0	0	2	2	0	0	2	0	0	2	0	0	0	2	2	2	2	2	2	0	0	0	2	2	0	2	2	2	0	2	2	2	0	0	0	2	0	0	0	0	0	0	0	0
IWB3927	13	4A	68.67	0	2	0	0	2	2	0	0	2	0	0	2	0	0	0	2	2	2	2	2	2	0	0	0	2	2	0	2	2	2	0	2	2	2	0	0	0	2	0	0	0	0	0	0	0	0
IWB12610	13	7A	75.9	0	2	0	2	2	2	0	0	2	0	0	2	0	0	0	0	2	2	2	2	2	0	0	0	2	2	0	2	2	0	0	2	2	2	0	2	0	0	0	0	0	0	2	0	0	0
IWB11004	13	7A	77	0	2	0	2	2	2	0	0	2	0	0	2	0	0	0	0	2	2	2	2	2	0	0	0	2	2	0	2	2	0	0	2	2	2	0	2	0	0	2	0	0	0	2	0	0	0
IWB12296	13	7A	80.88	0	2	0	2	2	0	0	0	2	0	0	2	0	0	0	0	2	2	2	2	2	0	0	0	2	2	0	2	2	0	0	2	2	2	0	2	0	0	2	2	0	0	2	0	0	0
IWB4375	13	NA	81.98	0	2	0	2	2	0	0	0	2	0	0	2	0	0	0	0	2	2	2	2	2	0	0	0	2	2	0	2	2	0	0	2	2	2	0	2	0	0	2	2	0	0	2	0	0	0
IWB20876	13	7A	83.09	0	2	0	2	2	0	0	0	2	0	0	2	0	0	0	0	2	2	2	2	2	0	0	0	2	2	0	2	2	0	0	2	2	2	0	2	0	0	2	2	0	0	2	0	0	0
IWB35027	13	NA	88.64	0	2	0	2	2	0	0	0	2	0	0	0	0	0	0	0	2	2	2	2	2	0	0	0	2	2	0	2	2	0	0	0	2	2	0	2	0	0	2	2	0	0	2	0	0	0
IWB13286	13	7A	90.29	0	2	2	2	2	0	0	0	2	2	0	0	0	0	0	0	2	2	2	2	2	0	0	0	2	2	0	2	2	0	0	0	2	2	0	2	0	0	2	2	0	0	2	0	0	0
IWB22378	13	7A	91.4	0	2	2	2	2	0	0	0	2	2	0	0	0	0	0	0	2	2	2	2	2	0	0	0	2	2	0	2	2	0	0	0	2	2	0	2	0	0	2	2	0	0	2	0	0	0
IWB38357	13	7A	98.07	0	2	2	2	2	0	0	0	2	2	0	0	0	0	0	0	2	2	2	2	2	0	0	0	2	2	0	0	2	0	2	0	2	2	0	2	0	0	2	2	0	0	2	0	0	0
IWB28195	14	6A	0	2	2	0	2	2	2	2	2	2	2	2	2	2	2	2	0	2	2	0	0	0	2	2	2	0	0	2	2	2	2	2	2	2	2	0	2	2	2	2	0	2	0	2	2	2	2
IWB45835	14	NA	24.43	2	2	2	2	2	2	2	2	0	2	2	2	2	2	2	0	2	0	0	0	0	2	2	2	0	0	2	2	2	0	0	2	2	2	2	2	2	2	2	2	2	2	2	2	2	2
IWB2741	14	3B	49.55	2	2	0	0	2	2	2	2	2	2	2	2	2	2	2	0	2	2	0	2	2	2	2	2	2	0	2	2	2	0	0	2	0	2	2	0	2	2	2	0	2	2	2	2	0	2
IWB4169	14	NA	68.03	2	0	0	0	2	0	2	2	2	0	0	2	2	2	0	0	2	2	0	2	2	0	0	2	2	0	0	2	2	0	0	0	0	0	2	0	2	2	2	0	0	2	2	2	0	2
IWB45786	14	NA	68.58	2	0	0	0	2	0	2	2	2	0	0	2	2	2	0	0	2	2	0	2	2	0	0	2	2	0	0	2	2	0	0	0	0	0	2	0	2	2	2	0	0	2	2	2	0	2
IWB7383	14	3A	69.7	2	-	0	0	2	-	2	2	2	0	0	2	2	2	0	0	2	2	0	2	2	0	0	2	2	0	0	2	2	0	0	0	0	0	2	0	2	2	2	0	0	2	2	2	0	2
IWB32587	14	3B	70.27	2	0	0	0	2	0	2	2	2	0	0	2	2	2	0	0	2	2	0	2	2	0	0	2	2	0	0	2	0	0	0	0	0	0	2	0	2	2	2	0	0	2	2	2	0	2
IWB30027	14	NA	70.82	2	0	0	0	2	0	2	2	2	0	0	2	2	2	0	0	2	2	0	2	2	0	0	2	2	0	0	2	0	0	0	0	0	0	2	2	2	2	2	0	0	2	2	2	0	2
IWB32553	14	3B	71.92	2	0	0	0	2	0	2	2	2	0	0	2	2	2	0	0	2	2	0	2	2	0	0	2	2	0	0	2	0	0	0	0	0	0	2	2	2	2	2	0	0	2	2	2	0	2
IWB11935	14	3B	80.86	2	0	0	0	2	0	2	2	2	0	0	2	2	2	0	0	2	0	0	2	2	0	0	2	2	0	2	2	0	2	0	0	0	0	2	2	2	2	2	0	0	2	2	2	2	0
IWB57272	14	3B	81.41	2	0	0	0	2	0	0	2	2	0	0	2	2	2	0	0	2	0	0	2	2	0	0	2	2	0	2	2	0	2	0	0	0	0	2	2	2	2	2	0	0	2	2	2	2	0
IWB10322	14	3B	81.96	2	0	0	0	2	0	0	2	2	0	2	2	2	2	0	0	2	0	0	2	2	0	0	2	2	0	2	2	0	2	0	0	0	0	2	2	2	2	2	0	0	2	2	2	2	0
IWB27191	14	6A	83.62	2	0	0	2	2	0	0	2	2	0	2	2	2	2	2	0	2	0	0	2	2	0	0	2	2	0	2	2	0	2	0	0	0	0	2	2	2	2	2	0	0	2	2	2	2	0
IWB21283	14	3B	84.17	2	0	0	2	2	0	0	2	2	0	2	2	2	2	2	0	2	0	0	2	2	0	0	2	2	0	2	2	0	2	0	0	0	0	0	2	2	2	2	0	0	2	2	2	2	0
IWB48982	14	3B	84.73	2	0	0	2	2	0	0	2	2	0	2	2	2	2	2	0	2	0	0	2	2	0	0	2	2	0	2	2	0	2	0	0	0	0	0	2	2	2	2	0	0	2	2	2	2	0
IWB28603	14	3B	89.71	2	0	0	2	2	0	0	2	2	0	2	2	2	2	2	0	2	0	0	0	2	0	0	2	0	0	2	2	0	2	0	0	0	0	0	2	2	2	2	0	0	2	2	2	2	0
IWB12091	14	NA	91.93	2	0	0	2	2	0	0	2	2	0	2	2	2	2	2	0	2	0	0	0	2	0	0	2	0	0	2	2	0	2	0	0	0	0	0	2	2	2	2	0	0	2	2	2	2	0
IWB23680	14	3B	94.69	2	2	0	2	2	0	0	2	2	0	2	2	2	2	2	0	2	0	0	0	2	2	0	2	0	0	2	2	0	2	0	0	0	2	0	2	2	2	2	0	0	2	2	2	2	0
IWB31458	14	3B	95.24	2	2	0	2	2	0	0	2	2	0	2	2	2	2	2	0	2	0	0	0	2	2	0	2	0	0	2	2	0	2	0	0	0	2	0	2	2	2	2	0	0	2	2	2	2	0
IWB80006	14	3B	96.36	2	2	0	2	2	0	0	2	2	0	2	2	2	2	2	0	2	0	0	0	2	2	2	2	0	0	2	2	0	2	0	0	0	2	0	2	2	2	2	0	0	2	2	2	2	0
IWB25749	14	3B	96.92	2	2	0	2	2	0	0	2	2	0	2	2	2	2	2	0	2	0	0	0	2	2	2	2	0	0	2	2	0	2	0	2	0	2	0	2	2	2	2	0	0	2	2	2	2	0
IWB7061	14	3B	97.47	2	2	0	2	2	0	0	2	2	0	2	2	2	2	2	0	2	0	0	0	2	2	2	2	0	0	2	2	0	2	0	2	0	2	0	2	2	2	2	0	0	2	2	2	2	0
IWB10631	14	3B	104.7	2	2	0	2	2	0	0	2	2	0	2	2	2	2	2	2	2	0	0	0	2	2	2	2	0	0	2	2	0	2	0	2	0	2	0	2	2	2	2	0	0	2	2	2	2	0
IWB1239	14	3B	105.26	2	2	0	2	2	0	0	2	2	0	2	2	2	2	2	2	2	0	0	0	2	2	2	2	0	0	2	2	0	2	0	2	0	2	0	2	2	2	2	0	0	2	2	2	2	0
IWB69615	14	NA	106.93	2	2	0	2	0	0	0	2	2	0	2	2	2	2	2	2	2	0	0	0	2	2	2	2	0	0	2	2	0	2	0	2	0	2	0	2	2	2	2	0	0	2	2	2	2	0
IWB24537	14	3B	107.49	2	2	0	2	0	0	0	2	2	0	2	2	2	2	2	2	2	0	0	0	2	2	2	2	0	0	2	2	0	2	0	2	0	2	0	2	2	2	2	0	0	2	2	2	2	0
IWB27455	14	3B	108.05	2	2	0	2	0	0	0	2	2	0	2	2	2	2	2	2	2	0	0	0	2	2	2	2	0	0	2	2	0	2	0	2	0	2	0	2	2	2	2	0	0	2	2	2	2	0
IWB68457	14	3B	116.51	0	2	0	2	0	0	0	2	2	0	2	2	2	2	2	2	2	0	2	0	2	2	2	2	0	2	2	2	0	2	0	2	0	2	0	2	2	2	2	0	2	2	2	2	2	0
IWB11828	14	3B	117.06	0	2	0	2	0	0	0	2	2	0	2	2	2	2	2	2	2	0	2	0	2	2	2	2	0	2	2	2	0	2	0	2	0	2	0	2	2	2	2	0	2	2	2	2	2	0
IWB10634	14	3B	117.62	0	2	0	2	0	0	0	2	2	0	2	2	2	2	2	2	2	0	2	0	2	2	2	2	0	2	2	2	0	2	0	2	0	2	0	2	2	2	2	0	2	2	2	2	2	0
IWB21557	14	3B	118.17	0	2	0	2	0	0	0	2	2	0	2	2	2	2	2	2	2	0	2	0	2	2	2	2	0	2	2	2	0	2	0	2	0	2	0	2	2	2	2	0	2	2	2	2	2	0
IWB10550	14	3B	118.72	0	2	0	2	0	0	0	2	2	0	2	2	2	2	2	2	2	0	2	0	2	2	2	2	0	2	2	2	0	2	0	2	0	2	0	2	2	2	2	0	2	2	2	2	2	0
IWB10279	14	NA	119.27	0	2	0	2	0	0	0	2	2	0	2	2	2	2	2	2	2	0	2	0	2	2	2	2	0	2	2	2	0	2	0	2	0	2	0	2	2	2	2	0	2	2	2	2	2	0
IWB9299	14	3A	119.83	0	2	0	2	0	0	0	2	2	0	2	2	2	2	2	2	2	0	2	0	2	2	2	2	0	2	2	2	0	2	0	2	0	2	0	2	2	2	2	0	2	2	2	2	2	0
IWB10658	14	3B	120.38	0	2	0	2	0	0	0	2	2	0	2	2	2	2	2	2	2	0	2	0	2	2	2	2	0	2	2	2	0	2	0	2	0	2	0	2	2	2	2	0	2	2	2	2	2	0
IWB24974	14	7B	126.49	0	2	0	2	0	0	0	2	2	2	2	2	2	2	0	2	2	0	2	0	2	2	2	2	0	2	2	2	0	2	0	2	0	2	0	2	2	2	2	0	2	2	2	2	2	0
IWB11716	14	3B	127.04	0	2	0	2	0	0	0	2	2	2	2	2	2	2	0	2	2	0	2	0	2	2	2	2	0	2	2	2	0	2	0	2	0	2	0	2	2	2	2	0	2	2	2	2	2	0
IWB55458	14	NA	127.59	0	2	0	2	0	0	0	2	2	2	2	2	2	2	0	2	2	0	2	0	2	2	2	2	0	2	2	2	0	2	0	2	0	2	0	2	2	2	2	0	2	2	2	2	2	0
IWB11650	14	3B	128.7	0	2	0	2	0	0	0	2	2	2	2	2	2	2	0	2	2	0	2	0	2	2	2	2	0	2	2	2	0	2	0	2	0	2	0	2	2	2	2	0	2	2	2	2	2	0
IWB47020	14	3B	130.91	0	2	0	2	0	0	0	2	2	2	2	2	2	2	0	2	2	0	2	0	2	2	2	2	0	2	2	2	0	2	0	2	0	2	0	2	2	2	2	0	2	2	2	2	2	0
IWB7068	14	3B	136.46	0	2	0	2	0	0	0	2	2	2	2	0	2	0	0	2	2	0	2	0	2	2	2	2	0	2	2	2	0	2	0	2	0	2	0	2	2	2	2	0	2	2	2	2	2	0
IWB11755	14	3B	140.33	0	2	0	2	0	0	0	2	2	2	2	2	2	2	0	2	2	0	2	0	2	2	2	2	0	2	2	2	0	2	0	2	0	2	0	2	2	2	2	0	2	2	2	2	2	0
IWB11046	14	3B	140.88	0	2	0	2	0	0	0	2	2	2	2	2	2	2	0	2	2	0	2	0	2	2	2	2	0	2	2	2	0	2	0	2	0	2	0	0	2	2	2	0	2	2	2	2	2	0
IWB45483	14	NA	141.44	0	2	0	2	0	0	0	2	2	2	2	2	2	2	0	2	2	0	2	0	2	2	2	2	0	2	2	2	0	2	0	2	0	2	0	0	2	2	2	0	2	2	2	2	2	0
IWB58218	14	3B	142.54	0	2	0	2	0	0	0	2	2	2	2	2	2	2	0	2	2	0	2	0	2	2	2	2	0	2	2	2	0	2	0	2	0	2	0	0	2	2	2	0	2	2	2	2	2	0
IWB5902	14	3B	143.09	0	2	0	2	0	0	0	0	2	2	2	2	2	2	0	2	2	0	2	0	2	2	2	2	0	2	2	2	0	2	0	2	0	2	0	0	2	2	2	0	2	2	2	2	2	0
IWB14288	14	NA	161.57	2	2	0	0	2	2	0	2	2	2	2	2	2	2	2	0	2	0	2	0	0	2	2	2	0	0	2	0	2	0	0	2	0	2	0	0	2	2	2	0	2	2	2	2	0	0
IWB11529	14	3B	162.12	2	2	0	0	2	2	0	2	2	2	2	2	2	2	2	0	2	0	0	0	0	2	2	2	0	0	2	0	2	0	0	2	0	2	0	0	2	2	2	0	2	2	2	2	0	0
IWB45115	14	NA	163.78	2	2	0	0	2	2	0	2	2	2	2	2	2	2	2	0	2	0	0	0	0	2	2	2	0	0	2	0	2	0	0	2	0	2	0	0	2	2	2	0	2	2	2	2	0	0
IWB32646	14	NA	168.77	2	2	0	0	2	2	0	2	2	2	2	2	2	2	2	0	2	0	0	0	0	2	2	2	0	0	2	0	2	0	0	2	0	2	0	0	2	2	2	0	2	2	2	2	0	0
IWB1758	14	3B	169.32	2	2	0	0	2	2	0	2	2	2	2	2	2	2	2	0	2	0	0	0	0	2	2	2	0	0	2	0	2	0	0	2	0	2	0	0	2	2	2	0	2	2	2	2	0	0
IWB37668	14	3B	172.09	2	2	0	0	2	2	0	2	0	2	2	2	2	2	2	0	2	0	0	0	0	2	2	2	0	0	2	0	2	0	0	2	0	2	0	0	2	2	2	0	2	2	2	2	0	0
IWB4774	14	NA	173.21	2	2	0	0	2	2	0	2	0	2	2	2	2	2	2	0	2	0	0	0	0	2	2	2	0	0	2	-	2	0	0	2	0	2	-	0	2	2	2	0	2	2	2	2	0	0
IWB80290	14	NA	175.49	2	2	0	0	2	2	0	2	0	2	2	2	2	2	2	0	2	0	0	0	0	2	2	-	0	0	2	0	2	0	0	2	0	2	0	0	2	2	2	0	2	2	2	2	2	0
IWB65302	14	3B	176.04	2	2	0	0	2	2	0	2	0	2	2	2	2	2	2	0	2	0	0	0	0	2	2	2	0	0	2	0	2	0	0	2	0	2	0	0	2	2	2	0	2	0	2	2	2	0
IWB12216	14	3B	177.7	2	2	0	0	2	2	0	2	0	2	2	2	2	2	2	0	2	0	0	0	0	2	2	2	0	0	2	0	2	0	0	2	0	2	0	0	2	2	2	0	2	0	2	2	2	0
IWB73813	14	3B	178.81	2	2	0	0	2	2	0	2	0	2	2	2	2	2	2	0	2	0	0	0	0	2	2	2	0	0	2	0	2	0	0	2	0	2	0	0	2	2	2	0	2	0	2	2	2	0
IWB908	14	2A	183.8	2	2	0	0	2	2	0	2	0	2	2	2	2	2	2	0	2	0	0	0	0	2	2	2	0	0	2	0	2	0	0	2	0	2	0	0	2	2	2	0	2	0	2	2	2	0
IWB26764	14	NA	186.01	2	2	0	0	2	2	0	2	0	2	2	2	2	2	2	0	2	0	0	0	0	2	2	2	0	0	2	0	2	0	0	2	0	2	0	0	2	2	2	0	2	0	2	2	2	2
IWB39782	14	3B	188.22	2	2	0	0	2	2	0	2	0	2	2	2	2	2	2	0	2	0	0	0	0	2	2	2	0	0	2	0	2	0	0	2	0	2	0	0	2	2	2	0	2	0	2	2	2	2
IWB24605	14	3B	189.32	2	2	0	0	2	2	0	2	0	2	2	2	2	2	2	0	2	0	0	0	0	2	2	2	0	0	2	0	2	0	0	2	0	2	0	0	2	2	2	0	2	0	2	2	2	2
IWB28196	14	4A	193.2	2	2	0	0	2	2	0	2	0	2	2	2	2	2	2	0	2	0	0	0	0	2	2	2	0	0	2	0	2	0	0	2	0	2	0	0	2	2	2	0	2	0	2	2	2	2
IWB14117	14	NA	195.41	2	2	0	0	2	2	0	2	0	2	2	2	2	2	2	0	2	0	0	0	0	2	2	2	0	0	2	0	2	0	0	2	0	2	0	0	2	2	2	0	2	0	2	2	2	2
IWB73044	14	3B	196.52	2	2	0	0	2	2	0	2	0	2	2	2	2	2	2	0	2	0	0	0	0	2	2	2	0	0	2	0	2	0	0	2	0	2	0	0	2	2	2	0	2	0	2	2	2	2
IWB12253	14	3B	200.39	2	2	0	2	2	2	0	2	0	2	2	2	2	2	2	0	2	0	0	0	0	2	2	2	0	0	2	0	2	0	0	2	0	2	0	0	2	2	2	0	2	0	2	2	2	2
IWB79300	14	3B	200.94	2	2	0	2	2	2	0	2	0	2	0	2	2	2	2	0	2	0	0	0	0	2	2	2	0	0	2	0	2	0	0	2	0	2	0	0	2	2	2	0	2	0	2	2	2	2
IWB15010	14	NA	202.6	2	2	0	2	2	2	0	2	0	2	2	2	2	2	2	0	2	0	0	0	0	2	2	2	0	0	2	0	2	0	0	2	0	2	0	0	2	2	2	0	2	0	2	2	2	2
IWB12745	14	3B	203.15	2	2	0	2	2	2	0	2	0	2	2	2	2	2	2	0	2	0	0	0	0	2	2	2	0	0	2	0	2	0	0	2	0	2	0	0	2	2	2	0	2	0	2	2	2	2
IWB3025	14	3B	203.71	2	2	0	2	2	2	0	2	0	2	2	2	2	2	2	0	2	0	0	0	0	2	2	2	0	0	2	0	2	0	2	2	0	2	0	0	2	2	2	0	2	0	2	2	2	2
IWB58563	14	3D	204.26	2	2	0	2	2	2	0	2	0	2	2	2	2	2	2	0	2	0	0	0	0	2	2	2	0	0	2	0	2	0	2	2	0	2	0	0	2	2	2	0	2	0	2	2	2	2
IWB11523	14	3B	208.72	2	2	2	2	2	2	0	2	0	2	2	2	2	2	2	0	2	0	0	0	0	2	2	2	0	0	2	0	2	0	2	2	2	2	0	0	2	2	2	0	2	0	2	2	2	2
IWB14318	14	3D	210.38	2	2	2	2	2	2	0	2	0	2	2	2	2	2	2	0	2	0	0	0	0	2	2	2	0	0	2	0	2	0	2	0	2	2	0	0	2	2	2	0	2	0	2	2	2	2
IWB23457	14	3B	212.03	2	0	2	2	2	2	0	2	0	2	2	2	2	2	2	0	2	0	0	0	0	2	2	2	0	0	2	0	2	0	2	0	2	0	0	0	2	2	2	0	2	0	2	2	2	2
IWB38902	14	3B	213.14	2	0	2	2	2	2	0	2	0	2	2	2	2	2	2	0	2	0	0	0	0	2	2	2	0	0	2	0	2	0	2	0	2	0	0	0	2	2	2	0	2	0	2	2	2	2
IWB11873	14	3B	216.46	0	0	2	2	2	2	0	2	0	2	0	2	2	2	2	0	2	0	0	0	2	2	2	2	0	0	2	0	2	0	2	0	2	0	0	0	2	2	2	0	2	0	2	2	2	2
IWB65215	15	6B	0	0	2	0	2	2	0	2	0	2	0	2	2	0	2	0	2	0	0	2	2	0	2	0	0	2	2	2	0	0	0	2	2	0	2	0	0	2	2	2	0	0	2	0	0	2	2
IWB20944	15	1B	2.77	2	2	0	2	2	0	2	0	2	0	2	2	0	2	0	2	0	0	2	2	0	2	0	0	2	2	2	0	0	0	2	2	0	2	0	0	2	2	2	0	0	2	0	0	2	2
IWB1654	15	6B	4.98	2	2	0	2	2	0	2	0	2	0	2	2	0	2	0	2	0	0	2	2	0	2	0	0	2	2	2	0	0	0	2	2	0	2	0	0	2	2	2	0	0	2	0	0	2	2
IWB19985	15	6B	7.19	2	0	0	2	2	0	2	0	2	0	2	2	0	2	0	2	0	0	2	2	0	2	0	0	2	2	2	0	0	0	2	2	0	0	0	0	2	2	2	0	0	2	0	0	2	2
IWB63786	15	6B	8.29	2	0	0	2	2	0	2	0	2	0	2	2	0	2	0	2	0	0	2	2	0	2	0	0	2	2	2	0	0	0	2	2	0	0	0	0	2	2	2	0	0	2	0	0	2	2
IWB26660	15	6B	9.4	2	0	0	2	2	0	2	0	2	0	0	2	0	2	0	2	0	0	2	2	0	2	0	0	2	2	2	0	0	0	2	2	0	0	0	0	2	2	2	0	0	2	0	0	2	2
IWB48362	15	6B	9.95	2	0	0	2	2	0	2	0	2	0	2	2	0	2	0	2	0	0	2	2	0	2	0	0	2	2	2	0	0	0	2	2	0	0	0	0	2	2	2	0	0	2	0	0	2	2
IWB27812	15	6B	12.72	2	0	0	2	2	0	2	0	2	0	2	2	0	2	0	2	0	0	2	2	0	2	0	0	2	2	2	0	0	0	2	2	0	0	0	0	2	2	2	0	0	2	0	0	2	2
IWB10379	15	6B	13.82	2	0	0	2	2	0	2	0	2	2	2	2	0	2	0	2	0	0	2	2	0	2	0	0	2	2	2	0	0	0	2	2	0	0	0	0	2	2	2	0	0	2	0	0	2	2
IWB65275	15	6B	14.93	2	0	0	2	2	0	2	0	2	2	2	2	0	2	0	2	0	0	2	2	0	2	0	0	2	2	2	0	0	0	2	2	0	0	0	0	2	2	2	0	0	2	0	0	2	2
IWB26890	15	6B	16.58	2	0	0	2	2	0	2	0	2	2	2	2	0	2	0	2	0	0	2	2	0	2	0	0	2	2	2	0	0	0	2	2	2	0	0	0	2	2	2	0	0	2	0	0	2	2
IWB39172	15	6B	18.8	2	0	0	2	2	0	2	0	2	2	2	2	0	2	0	2	0	0	2	2	0	2	0	0	2	2	2	0	0	0	2	2	2	0	0	0	2	2	2	0	0	2	0	0	2	2
IWB1187	15	6B	19.35	2	0	0	2	2	0	2	0	2	2	2	2	0	2	0	2	0	0	2	2	0	2	0	0	2	2	2	0	0	0	2	2	2	0	0	0	2	2	2	0	0	2	0	0	2	2
IWB24752	15	6B	64.55	2	0	0	0	0	0	0	2	0	2	2	0	2	2	0	2	0	2	0	0	2	0	0	2	0	0	0	2	0	0	2	0	0	0	0	0	2	2	0	0	0	2	0	2	0	0
IWB58663	15	1B	80.54	0	0	0	0	0	0	0	0	0	2	2	2	0	2	0	0	0	0	0	0	2	0	0	0	0	0	0	2	0	0	0	0	0	0	0	2	2	2	0	0	0	0	0	0	0	2
IWB48400	15	6B	103.59	2	0	0	2	2	0	2	0	0	2	2	2	0	2	0	2	0	0	0	2	2	2	0	0	2	0	0	2	0	0	2	2	2	0	0	2	2	2	0	2	0	2	0	0	2	2
IWB50289	15	6B	106.91	2	0	0	2	2	0	2	0	2	2	2	2	0	2	0	2	0	0	0	2	2	2	0	0	2	0	0	2	0	0	2	2	2	0	0	2	2	2	0	2	0	2	0	0	2	2
IWB12220	15	6B	108.02	2	0	0	2	2	0	2	0	2	2	2	2	0	2	0	2	0	0	0	2	2	2	0	0	2	0	0	2	0	0	2	2	2	0	0	2	2	2	0	2	0	2	0	0	2	2
IWB1645	15	6B	108.57	2	0	0	2	2	0	2	0	2	2	2	2	0	2	0	2	0	0	0	2	2	2	0	0	2	0	0	2	0	0	2	2	2	0	0	2	2	2	0	2	0	2	0	0	2	2
IWB14861	15	6B	109.12	2	0	0	2	2	0	2	0	0	2	2	2	0	2	0	2	0	0	0	2	2	2	0	0	2	0	0	2	0	0	2	2	2	0	0	2	2	2	0	2	0	2	0	0	2	2
IWB44503	15	6B	111.89	2	0	0	2	2	0	2	0	0	2	2	2	0	2	0	2	2	0	0	2	2	2	0	0	2	0	0	2	0	0	2	2	2	0	0	2	2	2	0	2	0	2	0	0	2	2
IWB13026	15	6B	112.44	2	0	0	2	2	0	2	0	0	2	2	2	0	2	0	2	0	0	0	2	2	2	0	0	2	0	0	2	0	0	2	2	2	0	0	2	2	2	0	2	0	2	0	0	2	2
IWB23856	15	NA	113	2	0	0	2	2	0	2	0	0	2	2	2	0	2	0	2	0	0	0	2	2	2	0	0	2	0	0	2	0	0	2	2	2	0	0	2	2	2	0	2	0	2	0	0	2	2
IWB31262	15	6B	113.56	2	0	0	2	2	0	2	0	0	2	2	2	0	2	0	2	0	0	0	2	2	2	0	0	2	0	0	2	0	0	2	2	2	0	0	2	2	2	0	2	0	2	0	0	2	2
IWB78487	15	6B	114.66	2	0	0	2	2	0	2	0	0	2	2	2	0	2	0	2	0	0	0	2	2	2	0	0	2	0	0	2	0	0	2	2	2	0	0	2	2	2	0	2	0	2	0	0	2	2
IWB10166	15	6B	115.22	2	0	0	2	2	0	2	0	0	2	2	2	0	2	0	2	0	0	0	2	2	2	0	0	2	0	0	2	0	0	2	2	2	0	0	2	2	2	0	2	0	2	0	0	2	2
IWB46491	15	NA	115.78	2	0	0	2	2	0	2	0	0	2	2	2	0	2	0	2	0	0	0	2	2	2	0	0	2	0	0	2	0	0	2	2	2	0	0	2	2	2	0	2	0	2	0	0	2	2
IWB25831	15	NA	116.33	2	0	0	2	2	0	2	0	0	2	2	2	0	2	0	2	0	0	0	2	2	2	0	0	2	0	0	2	0	0	2	2	2	0	0	2	2	2	0	2	0	2	0	0	2	2
IWB37758	15	NA	117.44	2	0	0	2	2	0	2	0	0	2	2	2	0	2	0	2	0	0	0	2	2	2	0	0	2	0	0	2	0	0	2	2	2	0	0	2	2	2	0	2	0	2	0	0	2	2
IWB42876	15	6B	118.54	2	0	0	2	2	0	2	0	0	2	2	2	0	2	0	2	0	0	0	2	2	2	0	0	2	0	0	2	0	0	2	2	2	0	0	2	2	2	0	2	0	2	0	0	2	2
IWB45266	15	6B	119.65	2	0	0	2	2	0	2	0	0	2	2	2	0	2	0	2	0	0	0	2	2	2	0	0	2	0	0	2	0	0	2	2	2	0	0	2	2	2	0	2	0	2	0	0	2	2
IWB10393	15	6B	120.75	2	0	0	2	2	0	2	0	0	2	2	2	0	2	0	2	0	0	0	2	2	2	0	0	2	0	0	2	0	0	2	2	2	0	0	2	2	2	0	2	0	2	0	0	2	2
IWB12804	15	6B	122.41	2	0	0	2	2	0	2	0	0	2	2	2	0	2	0	2	0	0	0	2	2	2	0	0	2	0	0	2	0	0	2	2	2	0	0	2	2	2	0	2	0	2	0	0	2	2
IWB28183	15	6B	122.96	2	0	0	2	2	0	2	0	0	2	2	2	0	2	0	2	0	0	0	2	2	2	0	0	2	0	0	2	0	0	2	2	2	0	0	2	2	2	0	2	0	2	0	0	2	2
IWB10553	15	6B	123.52	2	0	0	2	2	0	2	0	0	2	2	2	0	2	0	2	0	0	0	2	2	2	0	0	2	0	0	2	0	0	2	2	2	0	0	2	2	2	0	2	0	2	0	0	2	2
IWB10696	15	6B	124.07	2	0	0	2	2	0	2	0	0	2	2	2	0	2	0	2	0	0	0	2	2	2	0	0	2	0	0	2	0	0	2	2	2	0	0	2	2	2	0	2	0	2	0	0	2	2
IWB23124	15	6B	126.28	2	0	0	2	2	0	2	2	0	2	2	2	2	2	0	2	0	0	0	2	2	2	0	2	2	0	0	2	0	0	2	2	2	0	0	2	2	2	0	2	0	2	0	2	2	2
IWB11062	15	6B	126.83	2	0	0	2	2	0	2	2	0	2	2	2	2	2	0	2	0	0	0	2	2	2	0	2	2	0	0	2	0	0	2	2	2	0	0	2	2	2	0	2	0	2	0	2	2	2
IWB190	15	6B	127.94	2	0	0	2	2	0	2	2	0	2	2	2	2	2	2	2	0	2	0	2	2	2	0	2	2	0	0	2	0	0	2	2	2	0	0	2	2	2	0	2	0	2	0	2	2	2
IWB76113	15	6B	129.04	0	0	0	2	2	0	2	2	0	2	2	2	2	2	0	2	0	2	0	2	2	2	0	2	2	0	0	2	0	0	2	2	2	0	0	2	2	2	0	2	0	2	0	2	2	2
IWB10400	15	6B	129.6	2	0	0	2	2	0	2	2	0	2	2	2	2	2	0	2	0	2	0	2	2	2	0	2	2	0	0	2	0	0	2	2	2	0	0	2	2	2	0	2	0	2	0	2	2	2
IWB10351	15	6B	133.47	2	2	0	2	2	0	2	2	0	2	2	2	2	2	0	2	0	2	0	2	2	0	0	2	2	0	0	2	0	0	2	2	2	2	0	2	2	2	0	2	0	2	0	2	2	2
IWB20087	15	6B	135.13	2	2	0	2	2	0	2	2	0	2	2	2	2	2	0	2	0	2	0	2	2	0	2	2	2	0	0	2	0	0	2	2	2	2	0	2	2	2	0	2	0	2	0	2	2	2
IWB57839	15	6B	135.69	2	2	0	2	2	0	2	2	0	2	2	2	2	2	0	2	0	2	0	2	2	0	2	2	2	0	0	2	0	0	2	2	2	2	0	2	2	2	0	2	0	2	0	2	2	2
IWB29	15	NA	136.24	2	2	0	2	2	0	2	2	0	2	2	2	2	2	0	2	0	2	0	2	2	0	2	2	2	0	0	2	0	0	2	2	2	2	0	2	2	2	0	2	0	2	0	2	2	2
IWB21053	15	NA	139.56	2	2	0	2	2	0	2	2	0	2	2	2	2	2	0	2	0	2	0	2	2	0	2	2	2	0	0	2	0	0	2	2	2	2	0	2	2	2	0	2	0	2	0	2	0	2
IWB1708	15	6B	141.77	2	2	0	2	2	0	2	2	0	2	2	2	2	2	0	2	0	2	0	2	2	0	2	2	2	0	0	2	0	0	2	2	2	2	0	2	2	2	0	2	0	2	0	2	0	2
IWB1753	15	6B	162.82	2	2	0	2	2	0	2	2	2	2	2	2	2	2	2	2	0	2	2	2	2	0	2	2	2	2	2	2	0	0	2	2	2	2	0	2	2	2	2	2	2	2	2	2	2	2
IWB3263	15	6B	188.66	2	2	2	2	2	0	2	2	0	2	2	2	2	2	0	2	0	0	0	2	2	2	2	2	2	0	0	2	0	2	2	2	2	2	0	2	2	2	0	2	0	2	0	2	2	2
IWB41260	16	7A	0	0	2	2	2	2	2	2	0	2	2	2	2	0	0	2	0	2	2	2	2	2	0	0	0	2	2	2	2	2	2	2	2	2	2	0	2	2	2	2	0	0	0	2	0	0	2
IWB42856	16	5B	35.27	2	2	0	0	2	2	2	2	2	2	2	0	2	2	2	0	2	2	2	0	2	0	2	2	0	2	2	2	2	2	2	2	2	0	2	2	0	2	2	2	2	2	0	2	0	0
IWB61935	16	NA	66.36	0	2	0	0	2	2	2	2	0	2	2	0	2	2	2	0	2	2	2	0	2	2	2	2	0	2	2	2	2	2	2	2	2	2	2	2	2	2	0	0	0	0	2	2	2	0
IWB21268	16	7B	104.35	0	0	0	0	2	0	2	2	0	2	2	0	2	2	2	0	0	2	0	0	2	0	2	2	0	0	2	2	2	2	2	0	0	0	2	2	0	2	0	0	2	0	0	2	0	0
IWB12377	16	7D	105.45	0	0	0	0	2	0	2	2	0	2	2	0	2	2	2	0	0	2	0	0	2	0	2	2	0	0	2	2	2	2	2	0	0	0	2	2	0	2	0	0	2	0	0	2	0	0
IWB10240	16	7B	108.77	0	0	0	0	2	0	2	2	0	2	2	0	2	2	2	0	0	2	0	0	2	0	2	2	0	0	2	2	2	2	2	0	0	0	2	2	0	2	0	0	2	0	0	2	0	0
IWB23462	16	NA	110.43	0	2	0	0	2	0	2	2	0	2	2	0	2	2	2	0	0	2	0	0	2	0	2	2	0	0	2	2	2	2	2	0	0	0	2	2	0	2	0	0	2	0	0	2	0	0
IWB22030	16	7B	110.98	0	0	0	0	2	0	2	2	0	2	2	0	2	2	2	0	0	2	0	0	2	0	2	2	0	0	2	2	2	2	2	0	0	0	2	2	0	2	0	0	2	0	0	2	0	0
IWB5034	16	7B	114.3	0	0	0	0	2	0	2	2	0	2	2	0	2	2	2	0	0	2	0	0	2	0	2	2	0	0	2	2	2	2	2	0	0	0	2	2	0	2	0	0	2	0	0	2	0	0
IWB11561	16	7B	115.41	0	0	0	0	2	0	2	2	0	2	2	0	2	2	2	0	0	2	0	0	2	0	2	2	0	0	2	2	2	2	2	0	0	0	2	2	0	2	0	0	2	0	0	2	0	0
IWB12168	16	7B	116.51	0	0	0	0	2	0	2	2	0	2	2	0	2	2	2	0	0	2	0	0	2	0	2	2	0	0	2	2	2	2	2	0	0	0	2	2	0	2	0	0	2	0	0	2	0	0
IWB10912	16	7B	117.07	0	0	0	0	2	0	2	2	0	2	2	0	2	2	2	0	0	2	0	0	2	0	2	2	0	0	2	2	2	2	2	0	0	0	2	2	0	2	0	0	2	0	0	2	0	0
IWB35152	16	7B	118.72	0	0	0	0	2	0	2	2	0	2	2	0	2	2	2	0	0	2	2	0	2	0	2	2	0	2	2	2	2	2	2	0	0	0	2	2	0	2	0	0	2	0	0	2	0	0
IWB2166	16	7B	119.28	0	0	0	0	2	0	2	2	0	2	2	0	2	2	2	0	0	2	2	0	2	0	2	2	0	2	2	2	2	2	2	0	0	0	2	2	0	2	0	0	2	0	0	2	0	0
IWB25774	16	7B	119.83	0	0	0	0	2	0	2	2	0	2	2	0	2	2	2	0	0	2	2	0	2	0	2	2	0	2	2	2	2	2	2	0	0	0	2	2	0	2	0	0	0	0	0	2	0	0
IWB12357	16	7B	120.38	0	0	0	0	2	0	2	2	0	2	2	0	2	2	2	0	0	2	2	0	2	0	2	2	0	2	2	2	2	2	2	0	0	0	2	2	0	2	0	0	0	0	0	2	0	0
IWB21669	16	7B	120.93	0	0	0	0	2	2	2	2	0	2	2	0	2	2	2	0	0	2	2	0	2	0	2	2	0	2	2	2	2	2	2	0	0	0	2	2	0	2	0	0	0	0	0	2	0	0
IWB12401	16	7B	122.04	0	0	0	0	2	2	2	2	0	2	2	0	2	2	2	0	0	2	2	0	2	0	2	2	0	2	2	2	2	2	2	0	0	0	2	2	0	2	0	0	0	0	0	2	0	0
IWB46220	16	NA	122.59	0	0	0	0	2	2	2	2	0	2	2	0	2	2	2	0	0	2	2	0	2	0	2	2	0	2	2	2	2	2	2	0	0	0	2	2	0	2	0	0	0	0	0	2	0	0
IWB27294	16	7B	123.7	0	0	0	0	2	2	2	2	0	2	2	0	2	2	2	0	0	2	2	0	2	0	2	2	0	2	2	2	2	2	2	0	0	0	2	2	0	2	0	0	0	0	0	2	0	0
IWB69205	16	7B	124.26	0	0	0	0	2	2	2	2	0	2	2	0	2	2	2	0	0	2	2	0	2	0	2	2	0	2	2	2	2	2	2	0	0	0	2	2	0	2	0	0	0	0	0	2	0	0
IWB13168	16	2B	129.3	0	0	0	0	2	2	2	2	0	2	2	0	2	2	2	0	0	2	2	0	2	0	2	2	0	2	2	2	2	2	2	0	0	0	0	2	0	2	0	0	0	0	0	2	0	0
IWB5408	16	7B	130.41	0	0	0	0	2	2	2	2	0	2	2	0	2	2	2	0	0	2	2	0	2	0	2	2	0	2	2	2	2	2	2	0	2	0	0	2	0	2	0	0	0	0	0	2	0	0
IWB12175	16	7B	130.96	0	0	0	0	2	2	2	2	0	2	2	0	2	2	2	0	0	2	2	0	2	0	2	2	0	2	2	2	2	2	2	0	2	0	0	2	0	2	0	0	0	0	0	2	0	0
IWB10895	16	7B	131.51	0	0	0	0	2	2	2	2	0	2	2	0	2	2	2	0	0	2	2	0	2	0	2	2	0	2	2	2	2	2	2	0	2	0	0	2	0	2	0	0	0	0	0	2	0	0
IWB13136	16	7B	132.62	0	0	0	0	2	2	2	2	0	2	2	0	2	2	2	0	0	2	2	0	2	0	2	2	0	2	2	2	2	2	2	0	2	0	0	2	0	2	0	0	0	0	0	2	0	0
IWB3092	16	7B	139.28	0	0	0	0	2	2	2	0	0	2	2	0	0	2	2	0	0	2	2	2	2	0	2	0	0	2	2	2	2	2	2	0	2	0	0	2	0	2	0	0	0	0	0	0	0	0
IWB10070	16	7B	139.84	0	0	0	0	2	2	2	0	0	2	2	0	0	2	2	0	0	2	2	0	2	0	2	0	0	2	2	2	2	2	2	0	2	0	0	2	0	2	0	0	0	0	0	0	0	0
IWB76162	16	1B	141.5	0	0	0	0	2	2	2	0	0	2	2	0	0	2	2	0	0	2	2	0	2	0	2	0	0	2	2	2	2	2	2	0	2	0	0	2	0	2	0	0	0	0	0	0	0	0
IWB28513	16	7B	142.05	0	0	0	0	2	2	2	0	0	2	2	0	0	2	2	0	0	2	2	0	2	0	2	0	0	2	2	2	2	2	2	0	2	0	0	2	0	2	0	0	0	0	0	0	0	0
IWB43131	16	7B	142.6	0	0	0	0	2	2	2	0	0	2	2	0	0	2	2	0	0	2	2	0	2	0	2	0	0	2	2	2	2	2	2	0	2	0	0	2	0	2	0	0	0	0	0	0	0	0
IWB330	16	7B	143.71	0	0	0	0	0	2	2	0	0	2	2	0	0	2	2	0	0	2	2	0	2	0	2	0	0	2	2	2	2	2	2	0	2	0	0	2	2	2	0	0	0	0	0	0	0	0
IWB79739	16	7B	153.22	0	0	2	0	0	2	2	0	0	0	2	0	0	0	2	0	0	2	2	0	2	0	2	0	0	2	2	2	2	2	2	0	2	0	0	0	2	2	0	0	0	0	0	0	0	2
IWB10769	16	7B	159.33	0	0	2	0	0	2	2	0	0	2	2	0	0	0	2	0	0	2	2	0	2	0	0	0	0	2	2	0	0	2	2	0	2	0	0	0	2	2	0	0	0	0	0	0	0	2
IWB77535	16	7B	159.88	0	0	2	0	0	2	2	0	0	2	2	0	0	0	2	0	0	2	2	0	2	0	0	0	0	2	2	0	0	2	2	0	2	0	0	0	2	2	0	0	0	0	0	0	0	2
IWB10200	16	7D	160.98	0	0	2	0	0	2	2	0	0	2	2	0	0	0	2	0	0	2	2	0	2	0	0	0	0	2	2	0	0	2	2	0	2	0	0	0	2	2	0	0	0	0	0	0	0	2
IWB13479	16	7B	162.09	0	0	2	0	0	2	2	0	0	2	2	2	0	0	2	0	0	2	2	0	2	0	0	0	0	2	2	0	0	2	2	0	2	0	0	0	2	2	0	0	0	0	0	0	0	2
IWB10220	16	7B	163.2	0	0	2	0	0	2	2	0	0	2	2	2	0	0	2	0	0	2	2	0	2	0	0	0	0	2	2	0	0	2	2	0	2	0	0	0	2	2	0	0	0	0	0	0	0	2
IWB72050	16	7D	168.81	0	0	2	0	0	2	2	0	0	2	2	2	0	0	2	0	0	2	2	0	2	0	0	0	0	2	2	0	0	2	2	0	2	0	0	0	2	2	0	0	0	0	0	0	0	2
IWB54283	16	7B	169.37	0	0	2	0	0	2	2	0	0	2	2	2	0	0	2	0	0	2	2	0	2	0	0	0	0	2	2	0	0	2	2	0	2	0	0	0	2	2	0	0	0	0	0	0	0	2
IWB51594	16	7B	169.93	0	0	2	0	0	2	2	0	0	2	2	2	0	0	2	0	0	2	2	0	2	0	0	0	0	2	2	0	0	2	2	0	2	0	0	0	2	2	0	0	0	0	0	0	0	2
IWB76344	16	7B	171.58	0	0	2	0	0	2	2	0	0	2	2	2	0	0	2	0	0	2	2	0	2	0	0	0	0	2	2	0	0	2	2	0	2	0	0	0	2	2	0	0	0	0	0	0	0	2
IWB1480	16	NA	172.69	0	0	2	0	0	2	2	0	0	2	2	2	0	0	2	0	0	2	2	2	2	0	0	0	2	2	2	0	0	2	2	0	2	0	0	0	2	2	0	0	0	0	0	0	0	2
IWB32502	16	7B	174.9	0	0	2	0	0	2	2	0	0	2	2	2	0	0	2	0	0	2	2	2	2	0	0	0	2	2	2	0	0	2	2	0	2	0	0	0	2	2	0	0	0	0	0	0	0	2
IWB25263	16	7A	179.33	0	0	2	0	0	2	2	0	0	2	2	2	0	0	2	0	0	2	2	2	2	0	0	0	2	2	2	0	0	2	2	0	2	0	0	2	2	2	0	0	0	0	0	0	0	0
IWB19608	16	NA	182.1	0	2	2	0	0	2	2	0	0	2	2	2	0	0	2	0	0	2	2	2	2	0	0	0	2	2	2	0	0	2	2	0	2	2	0	2	2	2	0	0	0	0	0	0	0	0
IWB11703	16	7B	183.2	0	2	2	0	0	2	2	0	0	2	2	2	0	0	2	0	0	2	2	2	2	0	0	0	2	2	2	0	0	2	2	0	2	2	0	2	2	2	0	0	0	0	0	0	0	0
IWB16765	16	7D	183.75	0	2	2	0	0	2	2	0	0	2	2	2	0	0	2	0	0	2	2	2	2	0	0	0	2	2	2	0	0	2	2	0	2	2	0	2	2	2	0	0	0	0	0	0	0	0
IWB20673	16	NA	184.31	0	0	2	0	0	2	2	0	0	2	2	2	0	0	2	0	0	2	2	2	2	0	0	0	2	2	2	0	0	2	2	0	2	2	0	2	2	2	0	0	0	0	0	0	0	0
IWB10375	16	NA	185.41	0	2	2	0	0	2	2	0	0	2	2	2	0	0	2	0	0	2	2	2	2	0	0	0	2	2	2	0	0	2	2	0	2	2	0	2	2	2	0	0	0	0	0	0	0	0
IWB8652	16	7B	185.96	0	2	2	0	0	2	2	0	0	2	2	2	0	0	2	0	0	2	2	2	2	0	0	0	2	2	2	0	0	2	2	0	2	2	0	2	2	2	0	0	0	0	0	0	0	0
IWB11108	16	NA	187.07	0	2	2	0	0	2	2	0	0	2	2	2	0	0	2	0	0	2	2	2	2	0	0	0	2	2	2	0	0	2	2	0	2	2	0	2	2	2	0	0	0	0	0	0	0	0
IWB53146	16	7B	187.62	0	2	2	0	0	2	2	0	0	2	2	2	0	0	2	0	0	2	2	2	2	0	2	0	2	2	2	0	0	2	2	0	2	2	0	2	2	2	0	0	0	0	0	0	0	0
IWB26212	16	7B	193.17	0	2	2	0	0	0	2	0	0	2	2	2	0	0	2	0	0	2	2	2	2	0	2	0	2	2	2	0	0	2	0	0	2	2	0	2	2	2	0	0	0	0	0	0	0	0
IWB19554	16	7B	197.05	0	2	2	0	0	0	2	0	0	2	2	2	0	0	2	0	0	2	2	2	2	0	2	0	2	2	2	0	0	2	0	0	2	2	0	2	2	2	0	0	0	0	0	0	0	0
IWB29605	16	7A	197.6	0	2	2	0	0	0	2	0	0	2	2	2	0	0	2	0	0	2	2	2	2	0	2	0	2	2	2	0	0	2	0	0	2	2	0	2	2	2	0	0	0	0	0	0	0	0
IWB21741	16	NA	198.15	0	2	2	0	0	0	2	0	0	2	2	2	0	0	2	0	0	2	2	2	2	0	2	0	2	2	2	0	0	2	0	0	2	2	0	2	2	2	0	0	0	0	0	0	0	0
IWB71684	16	2B	199.26	0	2	2	0	0	0	2	0	0	2	2	2	0	0	2	0	0	2	2	2	2	0	2	0	2	2	2	0	0	2	0	0	2	2	0	2	2	2	0	0	0	0	0	0	0	0
IWB13248	16	7B	200.91	0	2	2	0	0	0	2	0	0	2	2	2	0	0	2	0	0	2	2	2	2	0	2	0	2	2	2	0	0	0	0	0	2	2	0	2	2	2	0	0	0	0	0	0	0	0
IWB3369	16	7B	203.12	0	2	2	0	0	0	2	0	0	2	2	2	0	0	2	0	0	2	2	2	2	0	2	0	2	2	2	0	0	0	0	0	2	2	0	2	2	2	0	0	0	0	0	0	0	0
IWB81114	16	NA	204.23	0	2	2	0	0	0	2	0	0	2	2	2	0	0	2	0	0	2	2	2	2	0	2	0	2	2	2	0	0	0	0	0	2	2	0	2	2	2	0	0	0	0	0	0	0	0
IWB35038	16	7B	204.78	0	2	2	0	0	0	2	0	0	2	2	2	0	0	2	0	0	2	2	2	2	0	2	0	2	2	2	0	0	0	0	0	2	2	0	2	2	2	0	0	0	0	0	0	0	0
IWB25504	16	NA	205.89	0	2	2	0	0	0	2	0	0	2	2	2	0	0	2	0	0	2	2	2	2	0	2	0	2	2	2	0	0	0	0	0	2	2	0	2	2	2	0	2	0	0	0	0	0	0
IWB1971	17	NA	0	0	0	0	2	0	2	2	0	0	2	2	0	0	0	0	0	2	0	0	0	0	2	0	0	0	0	0	0	0	0	2	0	2	0	2	2	2	2	2	2	2	0	0	0	0	0
IWB78632	17	1A	0.55	0	0	0	2	0	2	2	0	0	2	2	0	0	0	0	0	2	0	0	0	0	2	0	0	0	0	0	0	0	0	2	0	2	0	2	2	2	2	2	2	2	0	0	0	0	0
IWB54366	17	1A	1.66	0	0	0	2	0	2	2	0	0	2	2	0	0	0	0	0	2	0	0	0	0	2	0	0	0	0	0	0	0	0	2	0	2	0	2	2	2	2	2	2	2	0	2	0	0	0
IWB14323	17	1A	2.76	0	0	0	2	0	0	2	0	0	2	2	0	0	0	0	0	2	0	0	0	0	2	0	0	0	0	0	0	0	0	2	0	2	0	2	2	2	2	2	2	2	0	2	0	0	0
IWB11423	17	NA	3.87	0	0	0	2	0	0	2	0	0	2	2	0	0	0	0	0	2	0	0	0	0	2	0	0	0	0	0	0	0	0	2	0	2	0	2	2	2	2	2	2	2	0	2	0	0	0
IWB12600	17	1A	4.42	0	0	0	2	0	0	2	0	0	2	2	0	0	0	0	0	2	0	0	0	0	2	0	0	0	0	0	0	0	0	2	0	2	0	2	2	2	2	2	2	2	0	2	0	0	0
IWB10474	17	1A	4.97	0	0	0	2	0	0	2	0	0	2	2	0	0	0	0	0	2	0	0	0	0	2	0	0	0	0	0	0	0	0	2	0	2	0	2	2	2	2	2	2	2	0	2	0	0	0
IWB11161	17	1A	13.91	0	0	0	0	0	0	2	0	0	2	2	0	0	0	0	0	2	0	0	0	0	2	0	0	0	0	0	0	0	0	2	0	2	0	2	2	2	2	2	0	2	0	2	0	0	0
IWB45538	17	1A	14.46	0	0	0	0	0	0	2	0	0	2	2	0	0	0	0	0	2	0	0	0	0	2	0	0	0	0	0	0	0	0	2	0	2	0	2	2	2	2	2	0	2	0	2	0	0	0
IWB14141	17	1A	15.56	0	0	0	0	0	0	2	0	0	2	2	0	0	0	0	0	2	0	0	0	0	2	0	0	0	0	0	0	0	0	2	0	2	0	0	2	2	2	2	0	2	0	2	0	0	0
IWB11547	17	1A	24.5	0	0	0	0	0	0	2	2	0	2	0	0	2	0	0	0	2	0	0	0	0	2	0	2	0	0	0	0	2	0	2	0	2	0	0	2	2	2	2	0	2	0	2	2	0	0
IWB33406	17	1A	26.71	0	0	0	0	0	0	2	2	2	2	0	0	2	0	0	0	2	0	0	0	0	2	0	2	0	0	0	0	2	0	2	0	2	0	0	2	2	0	2	0	2	0	2	2	0	0
IWB11543	17	1A	27.26	0	0	0	0	0	0	2	2	2	2	0	0	2	0	0	0	2	0	0	0	0	2	0	2	0	0	0	0	2	0	2	0	2	0	0	2	2	0	2	0	2	0	2	2	0	0
IWB58518	17	NA	51	0	0	0	0	0	0	2	2	2	2	0	0	2	0	0	0	2	0	0	0	0	2	0	2	0	0	0	0	2	0	2	0	0	0	0	0	2	0	0	0	0	0	0	2	0	0
IWB10113	17	1A	73.37	0	0	0	0	0	0	2	2	2	2	0	0	2	0	0	0	2	0	0	0	0	2	0	2	0	0	0	0	2	0	2	0	2	0	0	2	2	0	2	0	2	0	2	2	0	0
IWB51039	17	1A	73.93	0	0	0	0	0	0	2	2	2	2	0	0	2	0	0	0	2	0	0	0	0	2	0	2	0	0	0	0	2	0	2	0	2	0	0	2	2	0	2	0	2	0	2	2	0	0
IWB22613	17	1A	75.03	0	0	0	0	0	0	2	2	2	2	0	0	2	0	0	0	2	0	0	0	0	2	0	2	0	0	0	0	2	0	2	0	2	0	0	2	2	0	2	0	2	0	2	2	0	0
IWB41642	17	NA	76.14	0	0	0	0	0	0	2	2	2	2	0	0	2	0	0	0	2	0	0	0	0	2	0	2	0	0	0	0	2	0	2	0	2	0	0	2	2	0	2	0	2	0	2	2	0	0
IWB11628	17	1A	76.69	0	0	0	0	0	0	2	2	2	2	0	0	2	0	0	0	2	0	0	0	0	2	0	2	0	0	0	0	2	0	2	0	2	0	0	2	2	0	2	0	2	0	2	2	0	0
IWB19958	17	1A	78.35	0	0	0	0	0	0	2	2	2	2	0	0	2	0	0	0	2	0	0	0	0	2	0	2	0	0	0	0	2	0	2	0	2	0	0	2	2	0	2	0	2	0	2	2	0	0
IWB1228	17	1A	78.9	0	0	0	0	0	0	2	2	2	2	0	0	2	0	0	0	2	0	0	0	0	2	0	2	0	0	0	0	2	0	2	0	2	0	0	2	2	0	2	0	2	0	2	2	0	0
IWB10042	17	1A	79.45	0	0	0	0	0	0	2	2	2	2	0	0	2	0	0	0	2	0	0	0	0	2	0	2	0	0	0	0	2	0	2	0	2	0	0	2	2	0	2	0	2	0	2	2	0	0
IWB31675	17	1A	80.01	0	0	0	0	0	0	2	2	2	2	0	0	2	0	0	0	2	0	0	0	0	2	0	2	0	0	0	0	2	0	2	0	2	0	0	0	2	0	2	0	2	0	2	2	0	0
IWB21382	17	1A	80.56	0	0	0	0	0	0	2	2	2	2	0	0	2	0	0	0	2	0	0	0	0	2	0	2	0	0	0	0	2	0	2	0	2	0	0	0	2	0	2	0	2	0	2	2	0	0
IWB22274	17	1A	81.11	0	0	0	0	0	0	2	2	2	2	0	0	2	0	0	0	2	0	0	0	0	2	0	2	0	0	0	0	2	0	2	0	2	0	0	0	2	0	2	0	2	0	2	2	0	0
IWB28824	17	1A	90.62	0	0	0	0	0	0	2	2	2	2	2	0	2	0	0	0	0	0	0	0	0	2	0	2	0	0	0	0	2	0	2	0	0	0	0	0	2	0	2	0	2	0	2	2	0	0
IWB48819	17	1A	105.4	0	0	0	0	0	0	2	2	2	2	2	0	2	0	0	0	2	0	2	0	0	0	0	2	0	2	0	0	2	0	2	0	0	0	0	0	2	2	2	0	2	0	0	2	2	0
IWB34995	17	1A	106.5	0	0	0	0	0	0	2	2	2	2	2	0	2	0	0	0	2	0	2	0	0	0	0	2	0	2	0	0	2	0	2	0	0	0	0	0	2	2	2	0	2	0	0	2	0	0
IWB1739	17	NA	107.61	0	0	2	0	0	0	2	2	2	2	2	0	2	0	0	0	2	0	2	0	0	0	0	2	0	2	0	0	2	0	2	0	0	0	0	0	2	2	2	0	2	0	0	2	0	0
IWB47586	17	1A	108.71	0	0	2	0	0	0	2	2	2	2	2	0	2	0	0	0	2	0	2	0	0	0	0	2	0	2	0	0	2	0	2	0	0	0	0	0	2	2	2	0	2	0	0	2	0	0
IWB80500	17	1A	109.26	0	0	2	0	0	0	2	2	2	2	2	0	2	0	0	0	2	0	2	0	0	0	0	2	0	2	0	0	2	0	2	0	0	0	0	0	2	2	2	0	2	0	0	2	0	0
IWB11044	17	1A	109.82	0	0	2	0	0	0	2	2	2	2	2	0	2	0	0	0	2	0	2	0	0	0	0	2	0	2	0	0	2	0	2	0	0	0	0	0	2	2	2	0	2	0	0	2	0	0
IWB1071	17	1D	113.14	0	0	2	0	0	0	2	2	2	2	2	0	2	0	0	0	2	0	2	0	0	0	0	2	0	2	0	0	2	0	2	0	0	0	0	0	2	2	2	0	2	2	0	2	0	0
IWB36796	17	1B	117.59	0	0	2	0	0	0	2	2	0	2	2	0	2	0	0	0	2	0	2	0	0	2	0	2	0	2	-	0	2	0	2	0	0	0	0	2	2	2	2	0	2	2	0	2	0	0
IWB1201	17	1A	118.15	0	0	2	0	0	0	2	2	0	2	2	0	2	0	0	0	2	0	2	0	0	2	0	2	0	2	2	0	2	0	2	0	0	0	0	2	2	2	2	0	2	2	0	2	0	0
IWB4144	17	1B	127.65	2	0	2	0	2	0	2	2	2	2	2	0	2	2	2	0	2	0	2	0	0	2	0	2	0	2	2	0	2	0	2	0	0	0	0	2	2	2	2	2	2	2	0	2	0	0
IWB11098	17	1A	135.45	2	0	2	0	2	0	0	2	0	2	2	0	2	2	2	0	2	0	2	0	0	2	0	2	0	2	2	0	2	0	2	0	0	0	0	2	2	2	2	2	2	2	0	2	0	0
IWB10291	17	NA	136	2	0	2	0	2	0	0	2	0	2	2	0	2	2	2	0	2	0	2	0	0	2	0	2	0	2	2	0	2	0	2	0	0	0	0	2	2	2	2	2	2	2	0	2	0	0
IWB57592	17	1B	137.66	2	0	2	0	2	0	0	2	0	2	2	0	2	2	2	0	2	0	2	0	0	2	0	2	0	2	0	0	2	0	2	0	0	0	0	2	2	2	2	2	2	2	0	2	0	0
IWB10349	17	NA	139.87	2	2	2	0	2	0	0	2	0	2	2	0	2	2	2	0	2	0	2	0	0	2	0	2	0	2	2	0	2	0	2	0	0	0	0	2	2	2	2	2	2	2	0	2	0	0
IWB19471	18	1D	0	0	0	2	0	0	0	2	0	0	2	2	0	0	0	0	2	0	0	2	0	0	2	2	0	0	2	0	2	0	2	0	0	0	0	2	0	2	2	2	0	2	2	2	0	0	2
IWB65713	18	1D	1.66	0	0	2	0	0	0	2	0	0	2	2	0	0	0	0	2	0	0	2	0	0	2	2	0	0	2	0	2	0	2	0	0	0	0	2	0	2	2	2	2	2	2	2	0	0	2
IWB55046	18	1D	2.76	0	0	2	0	0	0	2	0	0	2	2	0	0	0	0	2	0	0	2	0	0	2	2	0	0	2	0	2	0	2	0	2	0	0	2	0	2	2	2	2	2	2	2	0	0	2
IWB45439	18	1D	15.17	0	0	2	0	0	0	0	0	0	2	2	0	0	0	0	0	2	2	2	0	0	2	0	0	0	2	0	2	0	2	0	2	0	0	2	0	2	2	2	2	2	2	2	0	0	2
IWB50599	18	1A	16.27	0	0	2	0	0	0	0	0	0	2	2	0	0	0	0	0	2	2	2	0	0	2	0	0	0	2	0	2	0	2	0	2	0	0	2	0	2	2	2	2	2	2	2	0	0	2
IWB13067	18	NA	17.93	0	0	2	0	0	0	0	0	0	2	2	0	0	0	0	0	2	2	2	0	0	2	0	0	0	2	0	2	0	2	0	2	0	0	2	0	2	2	2	2	2	2	2	0	0	2
IWB4985	18	NA	20.14	0	0	2	0	0	0	0	0	0	2	2	0	0	0	0	0	2	2	2	0	0	2	0	0	0	2	0	2	0	2	0	2	0	0	2	0	2	2	2	2	2	2	2	0	0	2
IWB1009	18	1D	21.25	0	0	2	0	0	0	0	0	0	2	2	0	0	0	0	0	2	2	2	0	0	2	0	0	0	2	0	2	0	2	0	2	0	0	2	0	2	2	2	2	2	2	2	0	0	2
IWB76920	18	1D	22.35	0	0	2	0	0	0	0	0	0	2	2	0	0	0	0	0	2	2	2	0	0	2	0	0	0	2	0	2	0	2	0	2	0	0	2	0	2	2	2	2	2	2	2	0	0	2
IWB10730	18	1D	29.58	0	0	2	0	0	0	0	2	0	2	2	0	2	0	0	0	2	2	2	0	0	2	0	2	0	2	0	0	0	2	0	2	0	0	2	0	2	2	2	2	2	2	2	2	0	2
IWB29640	18	NA	31.24	0	0	2	0	0	0	0	2	0	2	0	0	2	0	0	0	2	2	2	0	0	2	0	2	0	2	0	0	0	2	0	2	0	0	2	0	2	2	2	2	2	2	2	2	0	2
IWB21104	18	1D	31.79	0	0	2	0	0	0	0	2	0	2	0	0	2	0	0	0	2	2	2	0	0	2	0	2	0	2	0	0	0	2	0	2	0	0	2	0	2	2	2	2	2	2	2	2	0	2
IWB18376	18	1D	32.35	0	0	2	0	0	0	0	2	0	2	0	0	2	0	0	0	2	2	2	0	0	2	0	2	0	2	0	0	0	2	0	2	0	0	2	0	2	2	2	2	2	2	2	2	0	2
IWB14343	18	1D	39.58	0	0	2	0	0	0	0	2	0	2	2	0	2	0	0	0	2	2	2	0	0	2	0	2	0	2	0	0	0	2	0	2	0	0	2	2	2	2	2	2	2	2	2	2	0	0
IWB42629	18	1D	54.96	0	0	2	0	0	0	0	2	0	2	2	0	2	0	0	0	2	2	2	0	0	2	0	2	0	2	0	0	0	2	0	2	0	0	2	2	2	0	2	0	2	2	2	2	0	0
IWB11524	18	1D	63.33	0	0	2	2	0	0	0	2	2	2	2	2	2	0	0	0	0	2	2	0	0	0	0	2	0	2	2	0	0	2	0	2	0	0	2	2	2	0	2	0	2	2	2	2	0	0
IWB11479	18	1D	63.88	0	0	2	2	0	0	0	2	2	2	2	2	2	0	0	0	0	2	2	0	0	0	0	2	0	2	2	0	0	2	0	2	0	0	2	2	2	0	2	0	2	2	2	2	0	0
IWB10099	18	1D	64.43	0	0	2	2	0	0	0	2	2	2	2	2	2	0	0	0	0	2	2	0	0	0	0	2	0	2	2	0	0	2	0	2	0	0	2	2	2	0	2	0	2	2	2	2	0	0
IWB49565	18	1D	64.99	0	0	2	2	0	0	0	2	2	2	2	2	2	0	0	0	0	2	2	0	0	0	0	2	0	2	2	0	0	2	0	2	0	0	2	2	2	0	2	0	2	2	2	2	0	0
IWB43543	18	NA	72.78	0	2	2	2	0	0	0	0	2	2	2	2	0	0	0	0	0	2	2	2	0	0	0	0	0	2	2	0	0	2	0	2	0	0	2	2	2	0	2	0	2	2	2	0	0	0
IWB41947	18	3D	77.21	0	0	2	2	0	0	0	0	2	2	2	2	0	0	0	0	0	2	2	0	0	0	0	0	0	2	2	0	0	2	0	2	0	0	2	2	2	0	2	0	2	2	2	0	0	0
IWB21928	18	1D	77.77	0	0	2	2	0	0	0	0	2	2	2	2	0	0	0	0	0	2	2	0	0	0	0	0	0	2	2	0	0	2	0	2	0	0	2	2	2	0	2	0	2	2	2	0	0	0
IWB35679	18	NA	78.87	0	0	2	2	0	0	0	0	2	2	2	2	0	0	0	0	0	2	2	0	2	0	0	0	0	2	2	0	0	2	0	2	0	0	2	2	2	0	2	0	2	2	2	0	0	0
IWB61426	18	1D	82.19	0	0	2	2	0	0	0	0	2	2	2	2	0	0	0	0	0	2	2	0	2	0	0	0	0	2	2	0	0	2	0	2	0	0	2	2	2	0	2	0	2	2	2	0	0	0
IWB17017	18	1D	83.3	0	0	2	2	0	0	0	0	2	2	2	2	0	0	0	0	0	2	2	0	2	0	0	0	0	2	2	0	0	2	0	2	0	0	2	2	2	0	2	0	2	2	2	0	0	0
IWB34905	18	1D	83.85	0	0	2	2	0	0	0	0	2	2	2	2	0	0	0	0	0	2	2	0	2	0	0	0	0	2	2	0	0	2	0	2	0	0	2	2	2	0	2	0	2	2	2	0	0	0
IWB42251	18	1D	85.51	0	0	2	2	0	0	0	0	2	2	2	2	0	0	0	0	0	2	2	0	2	0	0	0	0	2	0	0	0	2	0	2	0	0	0	2	2	0	2	0	2	2	2	0	0	0
IWB205	18	1D	87.72	0	0	2	2	0	0	0	0	2	2	2	2	0	0	0	0	2	2	2	0	2	2	0	0	0	2	0	0	0	2	0	2	0	0	0	2	2	0	2	0	2	2	2	0	0	0
IWB11061	18	1D	88.27	0	0	2	2	0	0	0	0	2	2	2	2	0	0	0	0	2	2	2	0	2	2	0	0	0	2	0	0	0	2	0	2	0	0	0	2	2	0	2	0	2	2	2	0	0	0
IWB16537	18	1D	88.82	2	0	2	2	0	0	0	0	2	2	2	2	0	0	0	0	2	2	2	0	2	2	0	0	0	2	0	0	0	2	0	2	0	0	0	2	2	0	2	0	2	2	2	0	0	0
IWB10778	18	1D	89.93	2	0	2	2	0	0	0	0	2	2	2	2	0	0	0	0	2	2	2	0	2	2	0	0	0	2	0	0	0	2	0	2	0	0	0	2	2	0	2	0	2	2	2	0	0	0
IWB26941	18	1D	90.48	2	0	2	2	0	0	0	0	2	2	2	2	0	0	0	0	2	2	2	0	2	2	0	0	0	2	0	0	0	2	0	2	0	0	0	2	2	0	2	0	2	2	2	0	0	0
IWB10655	18	1D	96.03	2	0	2	2	0	2	0	0	2	2	2	2	0	0	0	0	2	2	2	0	2	2	0	0	0	2	0	0	0	2	0	2	0	0	0	2	2	0	2	0	2	2	2	0	0	2
IWB56444	18	1D	110.81	2	0	2	0	0	2	0	0	2	2	2	2	0	0	0	0	2	2	2	2	2	2	0	0	2	2	0	0	0	0	0	0	0	0	0	2	2	0	2	0	2	2	2	0	0	2
IWB6677	18	1D	111.36	2	0	2	0	0	2	0	0	2	2	2	2	0	0	0	0	2	2	2	2	2	2	0	0	2	2	0	0	0	0	0	0	0	0	0	2	2	0	2	0	2	2	2	0	0	2
IWB11626	19	5A	0	0	0	2	2	0	0	0	0	2	0	2	2	0	2	0	2	2	2	0	2	0	0	2	0	2	0	2	0	0	2	2	0	0	0	2	0	2	2	0	0	2	0	0	0	2	0
IWB3132	19	5A	0.55	0	0	2	2	0	0	0	0	2	0	2	2	0	2	0	2	2	2	0	2	0	0	2	0	2	0	2	0	0	2	2	0	0	0	2	0	2	2	0	0	2	0	0	0	2	0
IWB12135	19	5A	7.22	0	0	2	2	0	2	0	0	2	0	2	2	0	2	0	2	2	2	0	2	0	0	2	0	2	0	2	0	2	0	2	0	0	0	2	0	2	2	0	2	2	0	0	0	2	0
IWB27060	19	5D	7.77	0	0	2	2	0	2	0	0	2	0	2	2	0	2	0	2	2	2	0	2	0	0	2	0	2	0	2	0	2	0	2	0	0	0	2	0	0	2	0	2	2	0	0	0	2	0
IWB34927	19	5A	8.33	0	0	2	2	0	2	0	0	2	2	2	2	0	2	0	2	2	2	0	2	0	0	2	0	2	0	2	0	2	0	2	0	0	0	2	0	0	2	0	2	2	0	0	0	2	0
IWB12711	19	5A	11.65	0	0	2	2	0	2	0	0	2	2	2	0	0	2	0	2	2	2	0	0	0	0	2	0	0	0	2	0	2	2	2	0	0	0	0	0	0	2	0	2	2	0	0	0	2	0
IWB10765	19	5A	12.2	0	0	2	2	0	2	0	0	2	2	2	0	0	2	0	2	2	2	0	0	0	0	2	0	0	0	2	0	2	2	2	0	0	0	0	0	0	2	0	2	2	0	0	0	2	0
IWB15328	19	5A	12.75	0	0	2	2	0	2	0	0	2	2	2	0	0	2	0	2	2	2	0	0	0	0	2	0	0	0	2	0	2	2	2	0	0	0	0	0	0	2	0	2	2	0	0	0	2	2
IWB70049	19	5A	17.26	0	0	2	2	0	2	0	0	2	2	2	0	0	2	0	2	2	2	0	0	0	0	2	0	0	0	2	0	2	2	2	0	0	0	0	0	0	2	0	2	2	-	0	0	2	2
IWB35391	19	NA	23.47	0	0	2	2	0	2	0	0	2	2	2	0	0	2	0	2	2	2	0	0	0	0	2	0	0	0	0	0	2	0	2	0	0	0	0	0	0	2	0	2	2	0	0	0	2	2
IWB76666	19	5A	29.02	0	0	2	2	0	2	0	0	2	2	2	0	0	2	0	2	2	2	0	0	0	2	2	0	0	0	0	0	2	0	2	0	0	0	0	0	0	2	0	2	2	0	0	0	2	2
IWB64718	19	NA	29.57	0	0	2	2	0	2	0	0	2	2	2	0	0	2	0	2	2	2	0	0	0	2	2	0	0	0	0	0	2	0	2	0	0	0	0	0	0	2	0	2	2	0	0	0	2	2
IWB15768	19	NA	30.12	0	0	2	2	0	2	0	0	2	2	2	0	0	2	0	2	2	2	0	0	0	2	2	0	0	0	0	0	2	0	2	0	0	0	0	0	0	2	0	2	2	0	0	0	2	2
IWB40074	19	NA	31.78	0	0	2	2	0	2	0	0	2	2	2	0	0	2	0	2	2	2	0	0	0	2	2	0	0	0	0	0	2	0	2	0	0	0	0	0	0	2	0	2	2	0	0	0	2	2
IWB10909	19	5A	38.45	2	2	2	2	2	2	0	0	2	2	2	0	0	2	0	2	2	2	0	0	0	2	2	0	0	0	0	0	0	0	2	0	0	2	0	0	0	2	0	2	2	0	0	0	2	2
IWB3232	19	5A	40.11	2	2	2	2	2	2	0	0	2	2	2	0	0	2	0	2	2	2	0	0	0	2	2	0	0	0	0	0	0	0	2	0	0	2	0	0	0	2	0	2	2	0	0	0	2	2
IWB60231	19	5A	40.66	2	2	2	2	2	2	0	0	2	2	2	2	0	2	0	2	2	2	0	0	0	2	2	0	0	0	0	0	0	0	2	0	0	2	0	0	0	2	0	2	2	0	0	0	2	2
IWB11590	19	5A	41.21	2	2	2	2	2	2	0	0	2	2	2	2	0	2	0	2	2	2	0	0	0	2	2	0	0	0	0	0	0	0	2	0	0	2	0	0	0	2	0	2	2	0	0	0	2	2
IWB11245	19	5A	41.76	2	2	2	2	2	2	0	0	2	2	2	2	0	2	0	2	2	2	0	0	0	2	2	0	0	0	0	0	0	0	2	0	0	2	0	0	0	2	2	2	2	0	0	0	2	2
IWB10313	19	5A	43.42	2	2	2	2	2	2	0	0	2	2	2	2	0	2	0	2	2	2	0	0	0	2	2	0	0	0	0	0	0	0	2	0	0	2	2	0	0	2	2	2	2	0	0	0	2	2
IWB4543	19	5A	47.85	2	2	2	2	2	2	0	0	2	2	2	2	0	2	0	2	2	0	0	0	0	2	2	0	0	0	0	0	0	0	2	0	0	2	2	0	0	2	2	2	2	0	0	0	2	2
IWB11281	19	NA	48.41	2	2	2	2	2	2	0	0	2	2	2	2	0	2	0	2	2	0	0	0	2	2	2	0	0	0	0	0	0	0	2	0	0	2	2	0	0	2	2	2	2	0	0	0	2	2
IWB38700	19	5A	51.17	2	2	2	2	2	2	0	0	2	2	2	2	0	2	0	2	2	0	0	0	2	2	2	0	0	0	0	0	0	0	2	0	0	2	2	0	0	2	2	2	2	0	0	0	2	2
IWB48691	19	5A	53.38	2	2	2	2	2	2	0	0	2	2	2	2	0	2	0	2	2	0	0	2	2	2	2	0	2	0	0	0	0	0	2	0	0	2	2	0	0	2	2	2	2	0	0	0	2	2
IWB2677	19	6B	57.26	2	2	2	2	2	2	0	0	2	2	0	2	0	2	0	2	2	0	0	2	2	2	2	0	2	0	0	0	0	0	2	0	0	2	2	0	0	2	2	2	2	0	0	0	2	2
IWB38165	19	5A	60.02	2	2	2	2	2	2	0	0	2	2	0	2	0	2	0	2	2	0	0	2	2	2	2	0	2	0	0	0	0	0	2	0	0	2	2	2	0	2	2	2	2	0	0	0	2	2
IWB24570	19	5A	60.58	2	2	2	2	2	2	0	0	2	2	0	2	0	2	0	2	2	0	0	2	2	2	2	0	2	0	0	0	0	0	2	0	0	2	2	2	0	2	2	2	2	0	0	0	2	2
IWB30349	19	5A	65.57	2	2	2	2	2	2	0	0	2	2	0	2	0	2	2	2	2	0	0	2	2	2	2	0	2	0	0	0	0	0	2	0	2	2	2	2	0	2	2	2	2	0	0	0	2	2
IWB36208	19	4B	66.12	2	2	2	2	2	2	0	0	2	2	0	2	0	2	2	2	2	0	0	2	2	2	2	0	2	0	0	0	0	0	2	0	2	2	2	2	0	2	2	2	2	0	0	0	2	2
IWB235	19	5A	69.99	2	2	2	2	2	2	2	0	2	2	0	2	0	2	2	2	2	0	0	2	2	2	2	0	2	0	0	0	0	0	2	0	2	2	2	2	0	2	2	2	2	0	0	0	2	2
IWB20135	19	5A	70.55	2	2	2	2	2	2	2	0	2	2	0	2	0	2	2	2	2	0	0	2	2	2	2	0	2	0	0	0	0	0	2	0	2	2	2	2	0	2	2	2	2	0	0	0	2	2
IWB79817	19	5A	71.1	2	2	2	2	2	2	2	0	2	2	0	2	0	2	2	2	2	0	0	2	2	2	2	0	2	0	0	0	0	0	2	0	2	2	2	2	0	2	2	2	2	0	0	0	2	2
IWB36596	20	4A	0	0	2	2	0	0	2	2	2	0	0	0	2	2	0	0	0	2	0	2	0	2	2	2	2	0	2	0	2	0	2	2	0	0	2	0	2	0	0	0	2	2	2	2	2	0	2
IWB6742	20	5D	0.55	0	2	2	0	0	2	2	2	0	0	0	2	2	0	0	0	2	0	2	0	2	2	2	2	0	2	0	2	0	2	2	0	0	2	0	2	0	0	0	2	2	2	0	2	0	2
IWB21120	20	NA	11.21	0	0	2	0	0	2	2	2	0	0	0	2	2	0	0	0	2	0	2	0	2	0	2	2	0	2	0	0	2	2	2	0	0	0	0	2	0	2	0	2	2	2	0	2	0	2
IWB10906	20	4A	11.76	0	0	2	0	0	2	2	2	0	0	0	2	2	0	0	0	2	0	2	0	2	0	2	2	0	2	0	0	2	2	2	0	0	0	0	2	0	2	0	2	2	2	0	2	0	2
IWB54997	20	4A	17.31	0	0	2	0	0	2	2	2	2	2	0	2	2	0	0	0	2	0	2	0	2	0	2	2	0	2	0	0	2	2	2	0	0	0	0	2	0	2	0	2	2	2	0	2	0	2
IWB47072	20	4A	19.52	0	0	2	0	0	2	2	2	2	2	0	2	2	0	0	0	2	0	2	0	2	0	2	2	0	2	0	0	2	2	2	0	0	0	0	2	0	2	0	2	2	2	0	2	0	2
IWB20951	20	4A	22.28	0	0	2	0	0	2	2	2	2	2	0	2	2	0	0	0	2	0	2	0	2	0	2	2	0	2	0	0	2	2	2	0	0	0	0	2	0	2	2	2	2	2	0	2	0	2
IWB37469	20	4A	30.08	0	0	2	0	0	2	2	2	2	2	0	2	2	0	2	0	2	2	2	0	2	0	2	2	0	2	0	0	2	2	2	0	0	0	0	2	0	2	2	2	2	2	0	2	0	2
IWB1375	20	4A	30.63	0	0	2	0	0	2	2	2	2	2	0	2	2	0	2	0	2	2	2	0	2	0	2	2	0	2	0	0	2	2	2	0	2	0	0	2	0	2	2	2	2	2	0	2	0	2
IWB60934	20	4A	37.3	0	0	2	0	0	2	2	2	2	2	0	2	2	0	2	0	2	2	2	0	2	0	2	2	0	2	0	0	2	2	2	0	2	0	0	2	2	2	2	2	2	2	0	2	0	2
IWB12737	20	4A	37.86	0	0	2	0	0	2	2	2	2	2	0	2	2	0	2	0	2	2	2	0	2	0	2	2	0	2	0	0	2	2	2	0	2	0	0	2	2	2	2	2	2	2	0	2	0	2
IWB37106	20	4A	38.41	0	2	2	0	0	2	2	2	2	2	0	2	2	0	2	0	2	2	2	0	2	0	2	2	0	2	0	0	2	2	2	0	2	0	0	2	2	2	2	2	2	2	0	2	0	2
IWB2658	20	4A	39.51	0	0	2	0	0	2	2	2	2	2	0	2	2	0	2	0	2	2	2	0	2	0	2	2	0	2	0	0	2	2	2	0	2	0	0	2	2	2	2	2	2	2	0	2	0	2
IWB10595	20	4A	40.07	0	0	2	0	0	2	2	2	2	2	0	2	2	0	2	0	2	2	2	0	2	0	2	2	0	2	0	0	2	2	2	0	2	0	0	2	2	2	2	2	2	2	0	2	0	2
IWB11678	20	4A	40.62	0	0	2	0	2	2	2	2	2	2	0	2	2	0	2	0	2	2	2	0	2	0	2	2	0	2	0	0	2	2	2	0	2	0	0	2	2	2	2	2	2	2	0	2	0	2
IWB25876	20	NA	41.18	0	0	2	0	2	2	2	2	2	2	0	2	2	0	2	0	2	2	2	0	2	0	2	2	0	2	0	0	2	2	2	0	2	0	0	2	2	2	2	2	2	2	0	2	0	2
IWB13347	20	4A	44.53	0	0	2	0	2	2	2	2	2	2	2	2	2	0	2	0	2	2	2	0	2	0	2	2	0	2	0	0	2	2	2	0	2	0	0	2	2	2	0	2	2	2	0	2	0	2
IWB19112	20	4A	45.09	0	0	2	0	2	2	2	2	2	2	2	2	2	0	2	0	2	2	2	0	2	0	2	2	0	2	0	0	2	2	2	0	2	0	0	2	2	2	0	2	2	2	0	2	0	2
IWB5019	20	7A	49.01	0	0	2	0	2	2	2	2	2	2	2	2	2	2	2	0	2	2	2	0	2	0	2	2	0	2	0	0	2	2	2	0	2	0	0	2	2	2	0	2	2	2	0	2	0	2
IWB56811	20	4A	50.68	0	0	2	0	2	0	2	2	2	2	2	2	2	2	2	0	2	2	2	0	2	0	2	2	0	2	0	0	2	2	2	0	2	0	0	2	2	2	0	2	2	2	0	2	0	2
IWB8189	20	1B	52.34	0	0	2	0	2	0	2	2	2	2	2	2	2	2	2	0	2	2	2	0	2	0	2	2	0	2	0	0	2	2	2	0	2	0	0	2	2	2	0	2	2	2	0	2	0	2
IWB10488	20	4A	53.45	0	0	2	0	2	0	2	2	2	2	2	2	2	2	2	0	2	2	2	0	2	0	2	2	0	2	0	0	2	2	2	0	2	0	0	2	2	2	0	2	2	2	0	2	0	2
IWB9122	20	4A	54	0	0	2	0	2	0	2	2	2	2	2	2	2	2	2	0	2	2	0	0	2	0	2	2	0	2	0	0	2	2	2	0	2	0	0	2	2	2	0	2	2	2	0	2	0	2
IWB11801	20	4A	55.1	0	0	2	0	2	0	2	2	2	2	2	2	2	2	2	0	2	2	2	0	2	0	2	2	0	2	0	0	2	2	2	0	2	0	0	2	2	2	0	2	2	2	0	2	0	2
IWB12351	20	7A	59.53	0	0	2	0	2	0	2	2	2	2	2	2	2	2	2	0	2	2	2	0	2	0	0	2	0	2	0	0	2	2	2	0	2	0	0	2	2	0	0	2	2	2	0	2	0	2
IWB1056	20	4A	60.09	0	0	2	0	2	0	2	2	2	2	2	2	2	2	2	0	2	2	2	0	2	0	0	2	0	2	0	0	2	2	2	0	2	0	0	2	2	0	0	2	2	2	0	2	0	2
IWB1166	21	7B	0	2	2	0	0	2	0	2	2	0	2	2	2	2	0	0	0	2	2	0	0	0	0	2	2	0	0	2	2	2	2	2	0	0	0	2	2	0	0	0	0	0	0	2	2	0	2
IWB17646	21	7B	1.66	0	0	0	0	2	0	2	2	0	2	2	2	2	0	0	0	2	2	0	0	0	0	2	2	0	0	2	2	2	2	2	0	0	0	2	2	0	0	0	0	0	0	2	2	0	2
IWB10520	21	7B	2.21	0	0	0	0	2	0	2	2	0	2	2	2	2	0	0	0	2	2	0	0	0	0	2	2	0	0	2	2	2	2	2	0	0	0	2	2	0	0	0	0	0	0	2	2	0	2
IWB50619	21	7B	2.77	0	0	0	0	2	0	2	2	0	2	2	2	2	0	0	0	2	2	0	0	0	0	2	2	0	0	2	2	2	2	2	0	0	0	2	2	0	0	0	0	0	0	2	2	0	2
IWB64859	21	7B	3.32	0	0	0	0	2	0	2	0	0	2	2	2	2	0	0	0	2	2	0	0	0	0	2	2	0	0	2	2	2	2	2	0	0	0	2	2	0	0	0	0	0	0	2	2	0	2
IWB55488	21	7B	6.09	0	0	0	0	2	0	2	2	0	2	2	2	2	0	0	0	2	2	0	0	0	0	2	2	0	0	2	2	2	2	2	0	0	0	2	2	0	0	0	0	0	0	2	2	0	2
IWB73342	21	NA	6.64	0	0	0	0	2	0	2	2	0	2	2	2	2	0	0	0	2	2	0	0	0	0	2	2	0	0	2	2	2	2	2	0	0	0	2	2	0	-	0	0	0	0	2	2	0	2
IWB8303	21	7B	7.2	0	0	0	0	2	0	2	2	0	2	2	2	2	0	0	0	2	2	0	0	0	0	2	2	0	0	2	2	2	2	2	0	0	0	2	2	0	0	0	0	0	0	2	2	0	2
IWB65909	21	7B	13.87	0	2	0	0	2	0	2	0	0	2	0	2	0	0	0	0	2	2	0	0	0	0	2	0	0	0	2	2	0	2	2	0	0	2	2	2	0	0	0	0	0	0	2	0	0	2
IWB12638	21	7B	16.08	0	2	0	0	2	0	2	0	0	2	0	2	0	0	0	0	2	2	0	0	0	0	2	0	0	0	2	2	0	2	2	0	0	2	2	2	0	0	0	0	0	0	2	0	0	2
IWB13781	21	7B	17.18	0	2	0	0	2	0	2	0	0	2	0	2	0	0	0	0	2	2	0	0	0	0	2	0	0	0	2	2	0	2	2	0	0	2	2	2	0	0	0	0	0	0	2	0	0	2
IWB57014	21	7B	18.3	0	2	0	0	2	0	2	0	0	2	0	2	0	0	0	0	2	2	0	0	0	0	2	0	0	0	2	2	0	2	2	0	0	2	2	2	0	0	0	0	0	0	2	0	0	2
IWB13261	21	7B	18.85	0	2	0	0	2	0	2	0	0	2	0	2	0	0	0	0	2	2	0	0	0	0	2	0	0	0	2	2	0	2	2	0	0	2	2	2	0	0	0	0	0	0	2	0	0	2
IWB12006	21	7B	19.4	0	2	0	0	2	0	2	0	0	2	0	2	0	0	0	0	2	2	0	0	0	0	2	0	0	0	2	2	0	2	2	0	0	2	2	2	0	0	0	0	0	0	2	0	0	2
IWB24509	21	7B	20.51	0	2	0	0	2	0	2	0	0	2	0	2	0	0	0	0	2	2	0	0	0	0	2	0	0	0	2	0	0	2	2	0	0	2	2	2	0	0	0	0	0	0	2	0	0	2
IWB12247	21	7B	21.61	0	0	0	0	2	0	2	0	0	2	0	2	0	0	0	0	2	2	0	0	0	0	2	0	0	0	2	0	0	2	2	0	0	2	2	2	0	0	0	0	0	0	2	0	0	2
IWB23620	21	7B	24.38	0	2	0	0	2	0	2	0	0	2	0	2	0	0	0	0	2	2	0	0	0	0	2	0	0	0	2	0	0	2	2	0	0	2	2	2	0	0	0	0	0	0	2	0	0	2
IWB55788	21	7B	26.04	0	2	0	2	2	0	2	0	0	2	0	2	0	0	0	0	2	2	0	0	0	0	2	0	0	0	2	0	0	2	2	0	0	2	2	2	0	0	0	0	0	0	2	0	0	2
IWB9405	21	7B	31.62	0	0	2	2	2	0	2	0	0	2	0	2	0	0	0	0	2	2	0	0	0	0	2	0	0	0	2	0	0	2	2	0	0	0	2	2	0	0	0	0	0	0	2	0	0	2
IWB25555	21	7B	32.17	0	0	2	2	2	0	2	0	0	2	0	2	0	0	0	0	2	2	0	0	0	0	2	0	0	0	2	0	0	2	2	0	0	0	2	2	0	0	0	0	0	0	2	0	0	2
IWB33242	22	4B	0	2	0	2	2	2	0	0	2	2	0	0	0	2	2	0	0	2	2	0	0	0	0	0	2	0	0	2	0	0	2	2	2	2	0	0	2	0	2	0	0	2	0	2	2	0	0
IWB10146	22	4B	0.55	2	0	2	2	2	0	0	2	2	0	0	0	2	2	0	0	2	2	0	0	0	0	0	2	0	0	2	0	0	2	2	2	2	0	0	2	0	2	0	0	2	0	2	2	0	0
IWB61098	22	4B	12.37	2	0	2	2	2	0	0	2	2	0	0	0	2	2	0	0	2	2	0	0	0	0	0	2	0	0	2	0	0	2	2	2	2	0	0	2	0	0	0	0	2	0	0	2	0	0
IWB2262	22	4B	12.92	2	0	2	2	2	0	0	2	2	0	0	0	2	2	0	0	2	2	0	0	0	0	0	2	0	0	2	0	0	2	2	2	2	0	0	2	0	0	0	0	2	0	0	2	0	0
IWB27019	22	4B	13.47	2	0	2	2	2	0	0	2	2	0	0	0	2	2	0	0	2	2	0	0	0	0	0	2	0	0	2	0	0	2	2	2	2	0	0	2	0	0	0	0	2	0	0	2	0	0
IWB6977	22	4B	15.13	2	0	2	0	2	0	0	2	2	0	0	0	2	2	0	0	2	2	0	0	0	0	0	2	0	0	2	0	0	2	2	2	2	0	0	2	0	0	0	0	2	0	0	2	0	0
IWB13107	22	NA	16.24	2	0	2	0	2	0	0	2	2	0	0	0	2	2	0	0	2	2	0	0	0	0	0	2	0	0	2	0	0	2	2	2	2	0	0	2	0	0	0	0	2	0	0	2	0	0
IWB43298	22	4B	16.79	2	0	2	0	2	0	0	2	2	0	0	0	2	2	0	0	2	2	0	0	0	0	0	2	0	0	2	0	0	2	2	2	2	0	0	2	0	0	0	0	2	0	0	2	0	0
IWB66459	22	NA	20.67	2	0	2	0	2	0	0	2	2	0	0	0	2	2	0	0	2	2	0	0	0	2	0	2	0	0	2	2	0	2	2	2	2	0	0	2	0	0	0	0	2	2	0	2	0	0
IWB68654	22	4B	30.74	2	0	2	0	2	0	0	2	2	0	0	0	2	0	0	0	2	2	0	0	0	2	0	2	0	0	2	2	0	2	2	2	2	2	2	2	0	0	0	0	2	2	0	2	0	0
IWB2333	22	4B	31.3	2	2	2	0	2	0	0	2	2	0	0	0	2	0	0	0	2	2	0	0	0	2	0	2	0	0	2	2	0	2	2	2	2	2	2	2	0	0	0	0	2	2	0	2	0	0
IWB77675	22	4B	34.06	2	2	2	0	2	0	0	2	2	0	0	0	2	0	0	0	2	2	2	0	0	2	0	2	0	2	2	2	0	2	2	2	2	2	2	2	0	0	0	0	2	2	0	2	0	0
IWB80693	22	4B	35.17	2	2	2	0	2	0	0	2	2	2	0	0	2	0	0	0	2	2	2	0	0	2	0	2	0	2	2	2	0	2	2	2	2	2	2	2	0	0	0	0	2	2	0	2	0	0
IWB30977	22	4B	36.27	2	2	2	0	2	0	0	2	2	2	0	0	2	0	0	0	2	2	2	0	0	2	0	2	0	2	2	2	0	2	2	2	2	2	2	2	0	0	0	0	2	2	0	2	0	0
IWB59992	22	4B	41.82	2	2	2	0	2	0	0	2	2	2	0	0	2	0	0	0	2	2	2	2	0	2	0	2	2	2	2	2	0	2	0	2	0	2	2	2	0	0	0	0	2	2	0	2	0	0
IWB73001	22	4B	45.7	2	2	2	0	2	0	0	2	2	2	0	0	2	0	0	0	2	2	2	2	0	2	0	2	2	2	2	2	0	2	0	2	0	2	2	2	0	0	0	0	2	2	0	2	0	0
IWB21502	22	4B	58.69	2	2	2	0	2	0	0	2	0	2	0	0	2	0	2	0	2	2	0	0	0	2	0	2	0	0	2	2	0	2	0	0	0	2	2	2	0	0	0	0	2	2	0	2	0	0
IWB27326	22	4B	59.79	2	2	2	0	2	0	0	2	0	2	0	0	2	0	2	0	2	2	0	0	0	2	0	2	0	0	2	2	0	2	0	0	0	2	2	2	0	0	0	0	2	2	0	2	0	0
IWB79673	22	4B	60.35	2	2	2	0	2	0	0	2	0	2	0	0	2	0	2	0	2	2	0	0	0	2	0	2	0	0	2	2	0	2	0	0	0	2	2	2	0	0	0	0	2	2	0	2	0	0
IWB3391	22	4B	60.9	2	2	2	0	2	0	0	2	0	2	0	0	2	0	2	0	2	2	0	0	0	2	0	2	0	0	2	2	0	2	0	0	0	2	2	2	0	0	0	0	2	2	0	2	0	0
IWB80989	22	4B	61.45	2	2	2	0	2	0	0	2	0	2	0	0	2	0	2	0	2	2	0	0	0	2	0	2	0	0	2	2	0	2	0	0	0	2	2	2	0	0	0	0	2	2	0	2	0	0
IWB11963	22	4B	62	2	2	2	0	2	0	0	2	0	2	0	0	2	0	2	0	2	2	0	0	0	2	0	2	0	0	2	2	0	2	0	0	0	2	2	2	0	0	0	0	2	2	0	2	0	0
IWB64397	22	4B	62.56	2	2	2	0	2	0	0	2	0	2	0	0	2	0	2	0	2	2	0	0	0	2	0	2	0	0	2	2	0	2	0	0	0	2	2	2	0	0	0	0	2	2	0	2	0	0
IWB23968	22	4B	64.21	2	2	2	0	2	0	0	2	0	2	0	0	2	0	2	0	2	2	0	0	0	2	0	2	0	0	2	2	0	2	0	0	0	2	2	2	0	0	0	0	2	2	0	2	0	0
IWB11884	22	4B	65.32	2	2	2	0	2	0	0	2	0	2	0	0	2	0	2	0	2	2	0	0	2	2	0	2	0	0	2	2	0	2	0	0	0	2	2	2	0	0	0	0	2	2	0	2	0	0
IWB20288	22	4B	65.87	2	2	2	0	2	0	0	2	0	2	0	0	2	0	2	0	2	2	0	0	2	2	0	2	0	0	2	2	0	2	0	0	0	2	2	2	0	0	0	0	2	2	0	2	0	0
IWB17082	22	4B	66.42	2	2	2	0	2	0	0	2	0	2	0	0	2	0	2	0	2	2	0	0	2	2	0	2	0	0	2	2	0	2	0	0	0	2	2	2	0	0	0	0	2	2	0	2	0	0
IWB30986	22	4B	68.08	2	2	2	0	2	0	0	2	0	2	0	0	2	0	0	0	2	2	0	0	2	2	0	2	0	0	2	2	0	2	0	0	0	2	2	2	0	0	0	0	2	2	0	2	0	0
IWB10847	22	4B	68.63	2	2	2	0	2	0	0	2	0	2	0	0	2	0	0	0	2	2	0	0	2	2	0	2	0	0	2	2	0	2	0	0	0	2	2	2	0	0	0	0	2	2	0	2	0	0
IWB13349	22	4B	69.19	2	2	2	0	2	0	0	2	0	2	0	0	2	0	0	0	2	2	0	0	2	2	0	2	0	0	2	2	0	2	0	0	0	2	2	2	0	0	0	0	2	2	0	2	0	0
IWB23337	22	4B	70.29	2	2	2	0	2	0	0	2	0	2	0	0	2	0	0	0	2	2	0	0	2	2	0	2	0	0	2	2	0	2	0	0	0	2	2	2	0	0	0	0	2	2	0	2	0	0
IWB35006	22	4B	75.84	2	2	2	0	2	0	0	2	0	0	0	0	2	0	0	2	2	0	0	0	2	2	0	2	0	0	2	2	0	2	0	2	0	2	2	2	0	0	0	0	2	2	0	2	0	0
IWB39351	22	4B	81.95	2	2	2	0	2	2	0	0	0	0	0	0	0	0	0	2	2	0	0	0	2	2	0	0	0	0	2	2	0	2	0	2	0	2	2	2	0	0	0	0	2	2	0	0	0	0
IWB32976	22	4B	82.5	2	2	2	0	2	2	0	0	0	0	0	0	0	0	0	2	2	0	0	0	2	2	0	0	0	0	2	2	0	2	0	2	0	2	2	2	0	0	0	0	2	2	0	0	0	0
IWB7462	22	4B	85.26	2	2	2	2	2	2	0	0	0	0	0	0	0	0	0	2	2	0	0	0	2	2	0	0	0	0	2	2	0	2	0	2	0	2	2	2	0	0	0	0	2	2	0	0	0	0
IWB75109	22	4B	86.37	2	2	2	2	2	2	0	0	0	0	0	0	0	0	0	2	2	0	0	2	2	2	0	0	2	0	2	2	0	2	0	2	0	2	2	2	0	0	0	0	2	2	0	0	0	0
IWB20754	22	4B	86.92	2	2	2	2	2	2	0	0	0	0	0	0	0	0	0	2	2	0	0	2	2	2	0	0	2	0	2	2	0	2	0	2	0	2	2	2	0	0	0	0	2	2	0	0	0	0
IWB41888	22	4B	87.47	2	2	2	2	2	2	0	0	0	0	0	0	0	0	0	2	2	0	0	2	2	2	0	0	2	0	2	2	0	2	0	2	0	2	2	2	0	0	0	0	2	2	0	0	0	0
IWB34604	22	4B	88.03	2	2	2	2	2	2	0	0	0	0	0	0	0	0	0	2	2	0	0	2	2	2	0	0	2	0	2	2	0	2	0	2	0	2	2	2	0	0	2	0	2	2	0	0	0	0
IWB11229	22	4B	88.58	2	2	2	2	2	2	0	0	0	0	0	0	0	0	0	2	2	0	0	2	0	2	0	0	2	0	2	2	0	2	0	2	0	2	2	2	0	0	2	0	2	2	0	0	0	0
IWB24856	22	4B	89.13	2	2	2	2	2	2	0	0	0	0	0	0	0	0	0	2	2	0	0	2	0	2	0	0	2	0	2	2	0	2	0	2	0	2	2	2	0	0	2	0	2	2	0	0	0	0
IWB52987	22	4B	90.79	2	2	2	2	2	2	0	0	0	0	0	0	0	0	2	2	2	0	0	2	0	2	0	0	2	0	2	2	0	2	0	2	0	2	2	2	0	0	2	0	2	2	0	0	0	0
IWB72179	22	4B	93.56	2	2	2	2	2	2	0	0	0	0	0	0	0	0	0	2	2	0	0	2	0	2	0	0	2	0	2	2	0	2	0	2	0	2	2	2	0	0	2	0	2	2	0	0	0	0
IWB53155	22	4B	94.11	2	2	2	2	2	2	0	0	0	0	0	0	0	0	0	2	2	0	0	2	0	2	0	0	2	0	2	2	0	2	0	2	0	2	2	2	0	0	2	0	2	2	0	0	0	0
IWB10640	22	4B	95.21	2	2	2	2	2	2	0	0	0	0	0	0	0	0	0	2	2	0	0	2	0	2	2	0	2	0	2	2	0	2	0	2	0	2	2	2	0	0	2	0	2	2	0	0	0	0
IWB10236	22	NA	97.98	2	2	2	2	2	0	2	0	0	0	0	0	0	0	0	2	2	0	0	2	0	2	2	0	2	0	2	2	0	2	0	2	0	2	2	2	0	0	2	0	2	2	0	0	0	0
IWB15145	22	4B	100.74	2	2	2	2	2	0	2	0	0	0	0	0	0	0	0	2	2	0	0	2	0	2	2	0	2	0	2	2	0	2	0	2	0	2	2	2	0	0	2	0	2	2	0	0	0	0
IWB28413	23	1D	0	2	0	2	2	2	2	0	0	0	0	2	0	0	0	0	2	2	0	2	0	2	0	0	0	0	2	0	0	2	0	0	0	2	0	0	2	2	2	0	0	2	2	0	0	0	2
IWB28321	23	NA	1.66	2	0	2	2	2	2	0	0	0	0	2	0	0	0	0	2	2	0	2	0	2	0	0	0	0	2	0	0	2	0	0	0	2	0	0	2	2	2	0	0	2	2	0	0	0	2
IWB10491	23	1A	2.76	2	0	2	2	2	2	0	0	0	0	2	0	0	0	0	2	2	0	2	0	2	0	0	0	0	2	0	0	2	0	0	0	2	0	0	2	2	2	0	0	2	2	0	0	0	2
IWB49951	23	1D	3.32	2	0	2	2	2	2	0	0	0	0	2	0	0	0	0	2	2	0	2	0	2	0	0	0	0	2	0	0	2	0	0	0	2	0	0	2	2	2	0	0	2	2	0	0	0	2
IWB39186	23	1A	4.42	2	0	2	2	2	2	0	0	0	0	2	0	0	0	0	2	2	0	2	0	2	0	0	0	0	2	0	0	2	0	0	0	2	0	0	2	2	2	0	0	2	2	0	0	0	0
IWB81210	23	1A	4.97	2	0	2	2	2	2	0	0	0	0	2	0	0	0	0	2	2	0	2	0	2	0	0	0	0	2	0	0	2	0	0	0	2	0	0	2	2	2	0	0	2	2	0	0	0	0
IWB11395	23	1A	6.63	2	0	2	2	2	2	0	0	0	0	2	0	0	0	0	2	2	0	0	0	2	0	0	0	0	0	0	0	2	0	0	0	2	0	0	2	2	2	0	0	2	2	0	0	0	0
IWB60174	23	1A	7.18	2	0	2	2	2	2	0	0	0	0	2	0	0	0	0	2	2	0	0	0	2	0	0	0	0	0	0	0	2	0	0	0	2	0	0	2	2	2	0	0	2	2	0	0	0	0
IWB42330	23	1A	8.84	2	0	2	2	2	2	0	0	0	0	2	0	0	0	0	0	2	0	0	0	2	0	0	0	0	0	0	0	2	0	0	0	2	0	0	2	2	2	0	0	2	2	0	0	0	0
IWB22955	23	1A	12.72	2	0	2	2	2	2	2	0	0	0	2	0	0	0	0	0	2	0	0	0	2	0	0	0	0	0	0	0	2	0	0	0	2	0	2	2	2	2	0	0	2	2	0	0	0	0
IWB22882	23	1A	18.26	2	0	2	2	2	2	2	0	0	2	2	0	0	0	0	0	2	0	0	0	2	0	0	0	0	0	0	0	2	0	0	0	2	0	2	2	2	2	0	0	2	0	0	0	0	0
IWB13551	23	1A	18.82	2	0	2	2	2	2	2	0	0	2	2	0	0	0	0	0	2	0	0	0	2	0	0	0	0	0	0	0	2	0	0	0	2	0	2	2	2	2	0	0	2	0	0	0	0	0
IWB46191	23	1A	19.92	2	0	2	2	2	2	2	0	0	2	2	0	0	0	0	0	2	0	0	0	2	0	0	0	0	0	0	0	2	0	0	0	2	0	2	2	2	2	0	0	2	0	0	0	0	0
IWB11057	23	1A	20.47	2	0	2	2	2	2	2	0	0	2	2	0	0	0	0	0	2	0	0	0	2	0	0	0	0	0	0	0	2	0	0	0	2	0	2	2	2	2	0	0	2	0	0	0	0	0
IWB77	23	1A	21.03	2	0	2	2	2	2	2	0	0	2	2	0	0	0	0	0	2	0	0	0	2	0	0	0	2	0	0	0	2	0	0	0	2	0	2	2	2	2	0	0	2	0	0	0	0	0
IWB34821	24	5A	0	0	0	2	0	0	0	0	0	2	2	2	0	0	0	0	2	2	2	2	0	0	2	2	0	0	2	2	0	0	2	0	0	0	0	0	0	0	0	0	0	2	0	0	0	0	0
IWB46840	24	5A	0.55	0	0	2	0	0	0	0	0	2	2	2	0	0	0	0	2	2	2	2	0	0	2	2	0	0	2	2	0	0	2	0	0	0	0	2	0	0	0	0	0	2	0	0	0	0	0
IWB62899	24	5A	3.87	0	0	2	0	0	0	2	0	2	2	2	0	0	0	0	2	2	2	2	0	0	2	2	0	0	2	2	0	0	0	0	0	0	0	2	0	0	0	0	0	0	0	0	0	0	0
IWB11167	24	5A	4.42	0	0	2	0	0	0	2	0	2	2	2	0	0	0	0	2	2	2	2	0	0	2	2	0	0	2	2	0	0	0	0	0	0	0	2	0	0	0	0	0	0	0	0	0	0	0
IWB14839	24	5A	4.98	0	0	2	0	0	0	2	0	2	2	2	0	0	0	0	2	2	2	2	0	0	2	2	0	0	2	2	0	0	0	0	0	0	0	2	0	0	0	0	0	0	0	0	0	0	0
IWB43006	24	5A	6.08	0	0	2	0	0	0	2	0	2	2	2	0	0	0	0	2	2	2	2	0	0	2	2	0	0	2	2	0	0	0	0	0	0	0	2	0	0	0	0	0	0	0	0	0	0	0
IWB22285	24	5A	8.29	0	0	2	0	0	0	2	0	2	2	2	0	0	2	0	2	2	2	2	0	0	2	2	0	0	2	2	0	0	0	0	0	0	0	2	0	0	0	0	0	0	0	0	0	0	0
IWB6728	24	5A	8.85	0	0	2	0	0	0	2	0	2	2	2	0	0	2	0	2	2	2	2	0	0	2	2	0	0	2	2	0	0	0	0	0	0	0	2	0	0	0	0	0	0	0	0	0	0	0
IWB11853	24	5A	14.39	0	0	2	0	0	0	2	0	2	2	2	0	0	2	2	2	2	2	2	0	0	2	2	0	0	2	2	0	0	0	2	0	0	0	2	0	0	0	0	0	0	0	0	0	0	0
IWB12084	24	5A	16.61	0	0	2	0	0	0	2	0	2	2	2	0	0	2	2	2	2	2	2	0	0	2	2	0	0	2	2	0	0	0	2	0	0	0	2	0	0	0	0	0	0	0	0	0	0	0
IWB35357	24	5A	17.16	0	0	0	0	0	0	2	0	2	2	2	0	0	2	2	2	2	2	2	0	0	2	2	0	0	2	2	0	0	0	2	0	0	0	2	0	0	0	0	0	0	0	0	0	0	0
IWB76364	24	5A	25	2	-	0	0	2	0	2	0	2	2	2	0	0	2	2	2	2	2	2	2	0	2	2	0	2	2	2	0	2	0	2	0	0	0	2	0	2	0	0	0	0	0	0	0	0	0
IWB5245	24	5A	30.02	2	0	0	0	2	0	2	0	2	2	2	0	0	2	2	2	2	2	2	2	0	2	2	0	2	2	2	0	2	0	2	0	0	0	2	0	2	0	0	0	0	0	0	0	0	0
IWB11440	24	5A	30.57	2	0	0	0	2	0	2	0	2	2	2	0	0	2	2	2	2	2	2	2	0	2	2	0	2	2	2	0	2	0	2	0	0	0	2	0	2	0	0	0	0	0	0	0	0	0
IWB65732	24	5A	36.68	2	0	0	0	2	0	2	0	2	2	2	0	0	0	2	2	2	2	2	2	0	2	2	0	2	2	2	0	2	0	2	0	0	0	2	0	2	0	0	2	0	0	0	0	0	0
IWB4311	24	5B	39.44	2	0	0	0	2	0	2	0	2	2	2	0	0	0	2	2	2	2	2	2	0	2	2	0	2	2	2	0	2	0	2	0	0	0	2	0	2	0	0	2	0	0	0	0	0	0
IWB35495	24	5B	44.43	2	0	0	0	2	2	2	2	2	2	2	0	2	0	2	2	2	2	2	2	0	2	0	2	2	2	2	0	2	0	2	0	0	0	2	0	2	0	0	2	0	0	0	2	0	0
IWB17140	24	5A	45.54	2	0	0	0	2	2	2	2	2	2	2	0	2	0	2	2	2	2	2	2	0	2	0	2	2	2	2	0	2	0	2	0	0	0	2	0	2	0	0	2	0	0	0	2	0	0
IWB23799	24	5A	51.08	2	0	0	0	2	2	2	2	2	2	0	0	2	0	2	2	2	2	2	2	2	2	0	2	2	2	2	0	2	0	2	0	0	0	2	0	2	0	0	2	0	0	0	2	0	0
IWB10092	24	5A	52.74	2	0	0	0	2	2	2	2	2	2	0	0	2	0	2	2	2	2	2	2	2	2	0	2	2	2	2	0	2	0	2	0	0	0	2	0	2	0	0	2	0	0	0	2	0	0
IWB25755	24	5A	54.95	2	0	0	0	2	2	2	2	2	2	0	0	2	0	2	2	2	2	2	2	2	2	0	2	2	2	2	0	2	0	2	2	0	0	2	0	2	0	0	2	0	0	0	2	0	0
IWB38954	25	3D	0	0	0	0	0	2	0	2	0	2	0	0	0	0	0	0	2	0	2	0	0	2	0	0	0	0	0	0	2	2	0	2	0	0	0	0	0	0	2	0	0	0	0	0	0	0	2
IWB70229	25	3D	0.55	0	0	0	0	2	0	2	0	2	0	0	0	0	0	0	2	0	2	0	0	2	0	0	0	0	0	0	2	2	0	2	0	0	0	0	0	0	2	0	0	0	0	0	0	0	2
IWB18340	25	3D	25.68	2	0	2	2	2	0	2	2	2	0	2	0	2	0	0	2	0	2	0	0	2	2	0	2	0	2	0	2	2	0	2	2	0	0	0	0	2	2	0	2	0	0	0	2	0	2
IWB10437	25	3D	26.23	2	0	2	2	2	0	2	2	2	0	2	0	2	0	0	2	0	2	2	0	2	2	0	2	0	2	0	2	2	0	2	2	0	0	0	0	2	2	0	2	0	0	0	2	0	2
IWB15087	25	3D	26.78	2	0	2	2	2	0	2	2	2	0	2	0	2	0	0	2	0	2	2	0	2	2	0	2	0	2	0	2	2	0	2	2	0	0	0	0	2	2	0	2	0	0	0	2	0	2
IWB10067	25	3B	29.55	2	0	2	2	2	0	2	2	2	0	2	0	2	0	0	2	0	2	2	0	2	2	0	2	0	2	0	2	2	0	2	2	0	0	0	0	2	2	0	2	0	0	0	2	0	0
IWB19749	25	3D	34.54	2	0	2	2	2	0	2	2	0	0	2	0	2	0	0	2	0	2	2	0	2	2	0	2	0	2	0	2	2	0	2	2	0	0	0	0	2	2	0	2	0	0	0	2	0	0
IWB10883	25	3D	37.86	2	2	2	2	2	0	2	2	0	0	2	0	2	0	0	2	0	2	2	0	2	2	0	2	0	2	0	2	0	0	2	2	0	0	0	0	2	2	0	2	0	0	0	2	0	0
IWB36035	25	3D	38.41	2	0	2	2	2	0	2	2	0	0	2	0	2	0	0	2	0	2	2	0	2	2	0	2	0	2	0	2	0	0	2	2	0	0	0	0	2	2	0	2	0	0	0	2	0	0
IWB20097	25	3D	38.97	2	0	2	2	2	0	2	2	0	0	2	0	2	0	0	2	0	2	2	0	2	2	0	2	0	2	0	2	0	0	2	2	0	0	0	0	2	2	0	2	0	0	0	2	0	0
IWB27554	25	3D	46.77	2	0	2	2	2	0	2	2	0	0	2	0	2	0	0	2	0	2	2	0	2	2	0	2	0	2	0	0	0	0	2	2	0	0	0	0	2	2	0	2	0	0	2	2	0	0
IWB13197	25	NA	65.35	2	0	2	0	2	0	2	2	0	2	2	2	2	0	0	2	2	2	2	0	0	2	0	2	0	2	0	0	0	0	0	2	0	0	0	0	2	2	0	2	0	0	2	2	0	0
IWB58806	26	3A	0	0	0	0	0	0	2	2	2	2	0	0	0	2	2	2	2	0	2	2	0	2	0	0	2	0	2	2	0	2	2	0	2	2	0	2	0	2	2	0	0	0	2	0	2	0	0
IWB10900	26	3A	0.55	0	0	0	0	0	2	2	2	2	0	0	0	2	2	2	2	0	2	2	0	2	0	0	2	0	2	2	0	2	2	0	2	2	0	2	0	2	2	0	0	0	2	0	2	0	0
IWB30466	26	3A	6.66	0	0	0	0	0	2	2	2	2	0	0	0	2	2	2	2	0	2	2	0	2	0	0	2	0	2	2	0	2	2	0	2	2	0	2	0	2	0	0	0	0	2	0	2	0	0
IWB29572	26	3A	9.43	0	0	0	0	0	2	2	2	2	0	0	0	2	2	2	2	0	2	2	0	0	0	0	2	0	2	2	0	2	2	0	2	2	0	2	0	2	0	0	0	0	2	0	2	0	0
IWB46039	26	3A	14.41	0	0	0	0	0	2	2	2	2	0	0	0	2	2	2	2	0	2	0	0	0	0	0	2	0	0	2	0	0	2	0	2	2	0	2	0	2	0	0	0	0	2	0	2	0	0
IWB63329	26	3A	15.52	0	0	0	0	0	0	2	2	2	0	0	0	2	2	2	2	0	2	0	0	0	0	0	2	0	0	2	2	0	2	0	2	2	0	2	0	2	0	0	0	0	2	0	2	0	0
IWB23450	26	3A	16.07	0	0	0	0	0	2	2	2	2	0	0	0	2	2	2	2	0	2	0	0	0	0	0	2	0	0	2	2	0	2	0	2	2	0	2	0	2	0	0	0	0	2	0	2	0	0
IWB63289	26	3A	18.28	0	0	0	0	0	2	2	2	2	2	0	0	2	2	2	2	0	2	0	0	0	0	0	2	0	0	2	2	0	2	0	0	2	0	2	0	2	0	0	0	0	2	0	2	0	0
IWB23959	26	NA	19.94	0	0	0	0	0	2	2	2	0	2	0	0	2	2	2	2	0	2	0	0	0	0	0	2	0	0	2	2	0	2	0	0	2	0	0	0	2	0	0	0	0	2	0	2	0	0
IWB22148	26	3A	21.05	0	0	0	0	0	2	2	2	0	2	0	0	2	2	2	2	0	2	0	0	0	0	0	2	0	0	2	2	0	2	0	0	2	0	0	0	2	0	0	0	0	2	0	2	0	0
IWB1994	26	3A	21.6	0	0	0	0	0	2	2	2	0	2	0	0	2	2	2	2	0	2	0	0	0	0	0	2	0	0	2	2	0	2	0	0	2	0	0	0	2	0	0	0	0	2	0	2	0	0
IWB76398	26	3A	22.15	0	0	0	0	0	2	2	2	0	2	0	0	2	2	2	2	0	2	0	0	0	0	0	2	0	0	2	2	0	2	0	0	2	0	0	2	2	0	0	0	0	2	0	2	0	0
IWB35224	26	NA	24.92	0	0	0	0	0	2	2	2	0	2	0	0	2	2	2	2	0	2	0	0	0	0	0	2	0	0	2	2	0	2	0	0	2	0	0	2	2	0	0	0	0	2	0	2	0	0
IWB10228	26	3A	28.24	0	0	0	0	0	2	2	2	0	2	0	0	2	2	2	2	0	2	0	2	0	0	0	2	2	0	2	2	0	2	0	0	2	0	0	2	2	0	0	0	0	2	0	2	0	0
IWB11204	26	3A	29.89	0	0	0	0	0	2	2	2	0	2	0	0	2	2	2	2	0	2	0	2	0	0	0	2	2	0	2	2	0	2	0	0	2	0	0	2	2	0	0	0	2	2	0	2	0	0
IWB10128	26	3A	31	0	0	0	0	0	2	2	2	0	2	0	0	2	2	2	2	0	2	0	2	0	0	0	2	2	0	2	2	0	2	0	0	2	0	0	2	2	0	0	0	2	2	0	2	0	0
IWB23609	26	3A	34.32	0	0	0	0	0	2	2	2	0	2	0	0	2	2	2	2	0	2	0	2	0	0	0	2	2	0	2	2	0	2	0	0	2	0	0	2	2	2	0	0	2	2	0	2	0	0
IWB11155	26	3A	34.87	0	0	0	0	0	2	2	2	0	2	0	0	2	2	2	2	0	2	0	2	0	0	0	2	2	0	2	2	0	2	0	0	2	0	0	2	2	2	0	0	2	2	0	2	0	0
IWB23583	26	3A	35.42	0	0	0	0	0	2	2	2	0	2	0	0	2	2	2	2	0	2	0	2	0	0	0	2	2	0	2	2	0	2	0	0	2	0	0	2	2	2	0	0	2	2	0	2	0	0
IWB10749	26	NA	35.98	0	0	0	0	0	2	2	2	0	2	0	0	2	2	2	2	0	2	0	2	0	0	0	2	2	0	2	2	0	2	0	0	2	0	0	2	2	2	0	0	2	2	0	2	0	0
IWB77509	26	3A	36.53	0	0	0	0	0	2	2	2	0	2	0	0	2	2	2	2	0	2	0	2	0	0	0	2	2	0	2	2	0	2	0	0	2	0	0	2	2	2	0	0	2	2	0	2	0	0
IWB19672	26	3A	37.63	0	0	0	0	0	2	2	2	0	2	0	0	2	2	2	2	0	2	0	2	0	0	0	2	2	0	2	0	0	2	2	0	2	0	0	2	2	2	0	0	2	2	0	2	0	0
IWB1051	26	NA	40.95	0	0	0	0	0	2	2	2	0	2	2	0	2	2	2	2	0	2	0	2	0	0	2	2	2	0	2	0	0	2	2	0	2	0	0	2	2	2	0	0	2	2	0	2	0	0
IWB53805	26	3A	46.5	0	0	0	0	0	2	2	2	0	2	2	0	2	2	2	2	0	2	0	2	0	0	2	2	2	0	2	0	0	2	2	0	2	0	0	2	2	2	0	0	0	2	2	2	0	0
IWB11732	26	NA	50.38	0	0	0	0	0	2	2	0	0	2	2	0	0	2	2	2	0	2	0	2	0	0	2	0	2	0	2	0	0	2	2	0	2	0	0	2	2	2	0	0	0	2	2	0	0	0
IWB34863	26	NA	50.93	0	0	0	0	0	2	2	0	0	2	2	0	0	2	2	2	0	2	0	2	0	0	2	0	2	0	2	0	0	2	2	0	2	0	0	2	2	2	0	0	0	2	2	0	0	0
IWB11609	26	3A	51.48	0	0	0	0	0	2	2	0	0	2	2	0	0	2	2	2	0	2	0	2	0	0	2	0	2	0	2	0	0	2	2	0	2	0	0	2	2	2	0	0	0	2	2	0	0	0
IWB17629	26	3A	52.03	0	0	0	0	0	2	2	0	0	2	2	0	0	2	2	2	0	2	0	2	0	0	2	0	2	0	2	0	0	2	2	0	2	0	0	2	2	2	0	0	0	2	2	0	0	0
IWB19997	26	3A	52.59	0	0	0	0	0	2	2	0	0	2	2	2	0	2	2	2	0	2	0	2	0	0	2	0	2	0	2	0	0	2	2	0	2	0	0	2	2	2	0	0	0	2	2	0	0	0
IWB39119	26	NA	53.14	0	0	0	0	0	2	2	0	0	2	2	2	0	2	2	2	0	2	0	2	0	0	2	0	2	0	2	0	0	2	2	0	2	0	0	2	2	2	0	0	0	2	2	0	0	0
IWB2733	26	3A	54.24	0	0	0	0	0	2	2	0	0	2	2	2	0	2	2	2	0	2	0	2	0	0	2	0	2	0	2	0	0	2	2	0	2	0	0	2	2	2	0	0	0	2	2	0	0	0
IWB12771	26	NA	54.8	0	0	0	0	0	2	2	0	0	2	2	2	0	2	2	2	0	2	0	2	0	0	2	0	2	0	2	0	0	2	2	0	2	0	0	2	2	2	0	0	0	2	2	0	0	0
IWB10063	26	3A	59.79	0	0	0	0	0	2	2	0	0	2	2	2	0	2	2	2	0	2	0	2	0	0	2	0	2	0	2	0	0	2	2	0	2	0	0	2	2	2	0	0	0	2	2	0	0	0
IWB1419	26	3A	63.11	0	0	0	0	0	2	2	0	0	2	2	2	0	2	2	2	2	2	0	2	0	0	2	0	2	0	2	0	0	2	2	0	2	0	0	2	2	2	0	0	0	2	2	0	0	0
IWB32388	26	3A	63.66	0	0	0	0	0	2	2	0	0	2	2	2	0	2	2	2	2	2	0	2	0	0	2	0	2	0	2	0	0	2	2	0	2	0	0	2	2	2	0	0	0	2	2	0	0	0
IWB26833	26	3A	65.32	0	0	0	0	0	2	2	0	0	2	2	2	0	2	2	2	2	2	0	2	0	0	2	0	2	0	2	0	0	2	2	0	2	0	2	2	2	2	0	0	0	2	2	0	0	0
IWB8523	26	3A	80.1	0	0	0	0	0	2	2	0	0	2	2	2	0	2	2	2	2	2	0	2	0	2	2	0	2	0	2	0	0	2	2	0	2	0	2	2	2	2	0	2	0	0	2	0	0	0
IWB29612	26	3A	80.65	0	0	0	0	0	2	2	0	0	2	2	0	0	2	2	2	2	2	0	2	0	2	2	0	2	0	2	0	0	2	2	0	2	0	2	2	2	2	0	2	0	0	2	0	0	0
IWB14875	26	7B	82.86	0	0	0	0	0	2	2	0	0	2	2	0	0	2	2	2	2	2	0	2	0	2	2	0	2	0	2	0	0	2	2	0	2	0	2	2	2	2	0	2	0	0	2	0	0	0
IWB63761	26	3A	83.97	0	0	0	0	0	2	2	0	0	2	2	0	0	2	2	2	2	2	0	2	0	2	2	0	2	0	2	0	0	2	2	0	2	0	2	2	2	2	0	2	0	0	2	0	0	0
IWB26667	26	3A	84.52	0	0	0	0	0	2	2	0	0	2	2	0	0	2	2	2	2	2	0	2	2	2	2	0	2	0	2	0	0	2	2	0	2	0	2	2	2	2	0	2	0	0	2	0	0	0
IWB31307	26	3A	90.63	0	0	0	0	0	2	2	0	0	2	2	0	0	2	2	2	2	2	0	2	2	2	2	0	2	0	2	0	0	2	0	0	2	0	2	2	2	0	0	2	2	2	2	0	0	0
IWB54680	27	2B	0	0	2	0	2	0	0	0	2	0	0	0	2	2	2	0	0	0	0	2	0	0	0	0	2	0	2	0	0	2	0	0	2	2	2	2	2	0	2	2	0	2	2	0	2	2	2
IWB22812	27	NA	2.21	0	2	0	2	2	0	0	2	0	0	0	2	2	2	0	0	0	0	2	0	0	0	0	2	0	2	0	0	2	0	0	2	2	2	2	2	0	2	2	0	2	2	0	2	2	2
IWB12476	27	7D	5.53	0	2	0	2	2	0	0	2	0	0	0	2	2	2	0	0	0	0	2	0	0	0	0	2	0	2	0	0	2	0	2	2	2	2	2	2	0	2	2	0	2	2	0	2	2	2
IWB16682	27	7D	7.19	0	2	0	2	2	0	0	2	0	0	0	2	2	2	0	0	0	0	2	0	0	0	0	2	0	2	0	0	2	0	2	2	2	2	2	2	0	2	2	0	2	2	0	2	2	2
IWB18737	27	NA	10.51	0	2	0	2	2	0	0	2	0	0	0	2	2	2	0	2	0	0	2	0	0	0	0	2	0	2	0	0	2	0	2	2	2	2	2	2	0	2	2	0	2	2	0	2	2	2
IWB10503	27	7D	11.06	0	2	0	2	2	0	0	2	0	0	2	2	2	2	0	2	0	0	2	0	0	0	0	2	0	2	0	0	2	0	2	2	2	2	2	2	0	2	2	0	2	2	0	2	2	2
IWB56616	27	7D	12.17	0	2	0	2	2	0	0	2	0	0	2	2	2	2	0	2	0	0	2	0	0	0	0	2	0	2	0	0	2	0	2	2	2	2	2	2	0	2	2	0	2	2	0	2	2	2
IWB57523	27	7D	40.19	2	2	0	2	2	0	0	2	0	0	2	2	2	2	0	2	2	2	2	2	2	0	0	2	2	2	2	0	2	0	2	2	2	2	2	2	0	2	2	2	2	2	2	2	2	2
IWB14018	28	5D	0	2	0	0	0	0	0	2	2	0	2	0	2	2	0	0	2	0	0	2	2	2	2	0	2	2	2	0	2	2	0	0	0	2	0	2	0	0	2	0	2	2	0	0	2	2	2
IWB79437	28	5D	7.8	2	0	0	0	0	0	2	2	0	2	0	2	2	0	0	2	0	0	2	2	2	2	0	2	2	2	2	2	2	0	0	0	2	0	2	0	2	2	0	2	2	0	0	2	2	2
IWB14014	28	5D	11.12	2	0	0	0	0	0	2	2	0	2	0	2	2	0	0	2	0	0	2	2	2	2	0	2	2	2	2	2	0	0	2	0	2	0	2	0	2	2	0	2	2	0	0	2	2	2
IWB18919	28	5D	11.67	2	0	0	0	0	0	2	2	0	2	0	2	2	0	0	2	0	0	2	2	2	2	0	2	2	2	2	2	0	0	2	0	2	0	2	0	2	2	0	2	2	0	0	2	2	2
IWB8663	28	5B	15.54	2	0	0	0	0	0	0	2	0	2	0	2	2	0	0	2	0	0	2	2	2	2	0	2	2	2	2	2	0	0	2	0	2	0	2	0	2	2	0	2	2	0	0	2	2	2
IWB24648	28	5D	16.1	2	0	0	0	0	0	0	2	0	2	0	2	2	0	0	2	0	0	2	2	2	2	0	2	2	2	2	2	0	0	2	0	2	0	2	0	2	2	0	2	2	0	0	2	2	2
IWB935	28	5D	19.42	2	0	0	0	0	0	0	2	0	2	0	2	2	0	0	0	0	0	2	2	2	2	0	2	2	2	2	2	0	0	2	0	2	0	2	0	2	2	0	2	2	0	0	2	2	2
IWB17362	28	5D	19.97	2	0	0	0	0	0	0	2	0	2	0	2	2	0	0	0	0	0	2	2	2	2	0	2	2	2	2	2	0	0	2	0	2	0	2	0	2	2	0	2	2	0	0	2	2	2
IWB11591	28	5D	21.63	2	0	0	0	0	0	0	2	0	2	0	2	2	0	0	0	0	0	2	2	2	2	0	2	2	2	2	2	0	0	2	0	2	0	2	0	2	2	0	2	2	0	0	2	2	2
IWB27155	28	5D	22.18	2	0	0	0	0	0	0	2	0	2	0	2	2	0	0	0	0	0	2	2	2	0	0	2	2	2	2	2	0	0	2	0	2	0	2	0	2	2	0	2	2	0	0	2	2	2
IWB10288	28	5D	22.73	2	0	0	0	0	0	0	2	0	2	0	2	2	0	0	0	0	0	2	2	2	0	0	2	2	2	2	2	0	0	2	0	2	0	2	0	2	2	0	2	2	0	0	2	2	2
IWB56420	28	5D	23.29	2	0	0	0	0	0	0	2	0	2	0	2	2	0	0	0	0	0	2	2	2	0	0	2	2	2	2	2	0	0	2	0	2	0	2	0	2	2	0	2	2	0	0	2	2	2
IWB54292	28	5D	29.39	2	0	0	0	0	0	0	2	0	2	0	2	2	2	0	0	0	0	2	0	2	0	0	2	0	2	2	2	0	0	2	0	2	0	2	0	2	2	0	2	2	0	0	2	2	2
IWB11400	28	NA	33.82	2	0	0	0	0	0	0	2	0	2	0	2	2	2	0	0	0	0	2	0	2	0	0	2	0	2	2	2	0	0	2	0	2	0	2	0	2	2	2	2	2	0	0	2	0	2
IWB12037	28	5D	68.22	2	2	0	2	0	0	2	2	0	2	2	2	2	0	2	0	0	2	2	2	2	0	0	2	2	2	2	2	0	2	2	2	2	2	2	0	2	2	0	2	2	0	0	2	2	2
IWB34660	29	4A	0	0	2	2	0	0	2	0	2	0	0	0	2	2	0	0	0	2	0	2	0	2	2	2	2	0	2	0	2	0	2	2	0	0	2	0	2	0	0	0	0	2	2	2	2	0	2
IWB1321	29	4A	0.55	0	2	2	0	0	2	0	2	0	0	0	2	2	0	0	0	2	0	2	0	2	2	2	2	0	2	0	2	0	2	2	0	0	2	0	2	0	0	0	0	2	2	2	2	0	2
IWB19937	29	4D	2.21	0	2	2	0	0	2	0	2	0	0	0	2	2	0	0	0	2	0	2	0	2	2	2	2	0	2	0	2	0	2	2	0	0	2	0	2	0	0	0	0	0	2	2	2	0	2
IWB12303	29	4A	4.42	2	2	2	0	0	2	0	2	0	2	0	2	2	0	0	0	2	0	2	0	0	2	2	2	0	2	0	2	0	2	0	0	0	2	0	2	0	0	0	0	0	2	2	2	0	2
IWB11778	29	4A	5.53	2	2	2	0	0	2	0	2	0	2	0	2	2	0	0	0	2	0	0	0	0	2	2	2	0	0	0	2	0	2	0	0	0	2	0	2	0	0	0	0	0	2	2	2	0	2
IWB65970	29	4A	7.19	2	2	2	0	0	2	0	2	0	2	0	2	2	0	0	0	2	0	0	0	0	2	2	2	0	0	0	2	0	2	0	0	0	2	0	2	0	0	0	0	0	2	2	2	0	0
IWB19697	29	NA	11.62	2	2	2	0	0	2	0	2	0	2	0	2	2	0	0	0	0	0	0	0	0	2	2	2	0	0	0	2	0	0	0	0	0	2	0	2	0	0	0	0	0	2	2	2	0	0
IWB18250	29	4D	12.17	2	2	2	0	0	2	0	2	0	2	0	2	2	0	0	0	0	0	0	0	0	2	2	2	0	0	0	2	0	0	0	0	0	2	0	2	0	0	0	0	0	2	2	2	0	0
IWB12834	29	4A	15.49	2	2	0	0	0	0	0	2	0	2	0	2	2	0	0	0	0	0	0	0	0	2	2	2	0	0	0	2	0	0	0	2	0	2	0	2	0	0	0	0	2	2	2	2	0	0
IWB31143	29	4A	16.04	2	2	0	0	0	0	0	2	0	2	0	2	2	0	0	0	0	0	0	0	0	2	2	2	0	0	0	2	0	0	0	2	0	2	0	2	0	0	0	0	2	2	2	2	0	0
IWB10471	29	7A	17.15	2	2	0	0	0	0	0	2	0	2	0	2	2	0	0	0	0	0	0	0	0	2	2	2	0	0	0	2	0	0	0	2	0	2	0	2	0	0	0	0	2	2	2	2	0	0
IWB9215	29	NA	17.7	2	2	0	0	0	0	0	2	0	2	0	2	2	0	0	0	0	0	0	0	0	0	2	2	0	0	0	2	0	0	0	2	0	2	0	2	0	0	0	0	2	2	2	2	0	0
IWB23168	29	4A	18.8	2	2	0	0	0	0	0	2	0	2	0	2	2	0	0	0	0	0	0	0	0	2	2	2	0	0	0	2	0	0	0	2	0	2	0	2	0	0	0	0	2	2	2	2	0	0
IWB46934	29	4A	19.91	2	2	0	0	0	0	0	2	0	2	0	2	2	0	0	0	0	0	0	0	0	2	2	2	0	0	0	2	0	0	0	2	0	2	0	2	0	0	0	0	2	2	2	2	0	0
IWB33052	29	NA	20.46	2	2	0	0	0	0	0	2	0	2	0	2	2	0	0	0	0	0	0	0	0	2	2	2	0	0	0	2	0	0	0	2	0	2	0	2	0	0	0	0	2	2	2	2	0	0
IWB21625	29	4A	22.12	2	2	0	0	0	0	0	2	0	2	0	2	2	0	0	0	0	0	0	0	0	2	2	2	0	0	0	2	0	0	0	2	0	2	0	0	0	0	0	0	2	2	2	2	0	0
IWB20649	29	4A	22.67	2	2	0	0	0	0	0	2	0	2	0	2	2	0	0	0	0	0	0	0	0	2	2	2	0	0	0	2	0	0	0	2	0	2	0	0	0	0	0	0	2	2	2	2	0	0
IWB18325	29	NA	24.33	2	0	0	0	0	0	0	2	0	2	0	2	2	0	0	0	0	0	0	0	0	2	2	2	0	0	0	2	0	0	0	2	0	2	0	0	0	0	0	0	2	2	2	2	0	0
IWB54290	29	4A	34.99	2	2	0	0	0	0	0	2	2	2	2	2	2	0	0	0	0	0	0	0	0	2	2	2	0	0	0	2	0	0	0	2	0	2	0	0	0	0	0	0	2	2	2	2	0	0
IWB77282	29	NA	42.78	2	2	0	0	0	0	0	2	2	2	2	2	2	0	0	0	0	0	0	0	0	2	2	2	0	0	0	2	2	0	0	2	2	2	0	0	0	0	0	0	0	2	2	2	0	0
IWB35445	29	NA	43.34	2	2	0	0	0	0	0	2	2	2	2	2	2	0	0	0	0	0	0	0	0	2	2	2	0	0	0	2	2	0	0	2	2	2	0	0	0	0	0	0	0	2	2	2	0	0
IWB12285	29	4A	69.17	2	2	0	0	0	0	0	2	2	0	2	2	2	2	2	2	2	0	0	0	0	2	0	2	0	0	0	2	0	0	0	2	2	2	0	0	0	0	0	2	0	2	0	2	2	2
IWB8008	29	4A	71.38	2	2	0	0	0	0	0	2	2	0	2	2	2	2	2	2	2	0	0	0	0	2	0	2	0	0	0	2	0	0	0	2	2	2	0	0	0	0	0	2	0	2	0	2	2	2
IWB10748	29	4A	76.93	2	0	0	0	0	0	0	2	2	0	2	2	2	0	2	2	2	0	0	2	0	2	0	2	2	0	0	2	0	0	0	2	2	0	0	0	0	0	0	2	0	2	0	2	2	2
IWB11401	30	NA	0	2	2	2	2	0	0	0	2	0	2	0	0	2	2	2	0	0	2	0	0	0	0	2	2	0	0	0	0	2	0	0	0	0	2	2	2	2	2	2	2	0	0	0	2	2	0
IWB20117	30	NA	0.55	2	2	2	2	0	0	0	2	0	2	0	0	2	2	2	0	0	2	0	0	0	0	2	2	0	0	0	0	2	0	0	0	2	2	2	2	2	2	2	2	0	0	0	2	2	0
IWB1438	30	7B	5.54	2	2	2	2	0	0	0	2	0	2	0	0	2	2	2	0	0	2	0	0	0	0	2	2	0	0	0	0	2	0	0	0	2	2	2	2	2	2	0	2	0	0	0	2	2	0
IWB20228	30	7B	9.97	2	2	2	2	0	0	0	2	0	2	0	0	2	2	2	0	0	2	0	0	2	0	2	2	0	0	2	0	2	0	0	0	2	2	2	2	2	2	0	2	0	0	0	2	2	0
IWB10879	30	7B	11.08	2	2	2	2	0	0	0	2	0	2	0	0	2	0	2	0	0	2	0	0	2	0	2	2	0	0	2	0	2	0	0	0	2	2	2	2	2	2	0	2	0	0	0	2	2	0
IWB53325	30	7D	13.84	2	2	2	2	0	0	0	2	0	2	0	0	2	0	2	0	2	2	2	0	2	0	2	2	0	2	2	0	2	0	0	0	2	2	2	2	2	2	0	2	0	0	0	2	2	0
IWB67315	30	7A	14.95	2	2	2	2	0	0	0	2	0	2	0	0	2	0	2	0	0	2	2	0	2	0	2	2	0	2	2	0	2	0	0	0	2	2	2	2	2	2	0	2	0	0	0	2	2	0
IWB53150	30	7A	15.51	2	2	2	2	0	0	0	2	0	2	0	0	2	0	2	0	0	2	2	0	2	0	2	2	0	2	2	0	2	0	0	0	2	2	2	2	2	2	0	2	0	0	0	2	2	0
IWB76332	30	7B	16.06	2	2	2	2	0	0	0	2	0	2	0	0	2	0	2	0	0	2	2	0	2	0	2	2	0	2	2	0	2	0	0	0	2	2	2	2	2	2	0	2	0	0	0	2	2	0
IWB76084	30	7B	22.17	2	2	2	0	0	0	2	2	0	2	0	0	2	0	2	0	0	2	2	0	2	0	2	2	0	2	2	0	2	0	0	0	2	2	2	2	2	2	0	2	0	0	0	2	2	0
IWB22944	31	5A	0	0	0	2	2	0	0	0	0	2	2	2	2	0	0	0	0	2	2	0	2	0	2	2	0	2	0	2	0	0	2	0	2	2	0	0	0	0	2	0	0	2	0	0	0	0	0
IWB12115	31	5A	4.43	0	0	2	2	0	0	0	0	2	2	2	2	0	0	0	0	2	2	0	2	0	2	2	0	2	0	2	0	0	2	0	2	0	0	0	0	0	2	0	0	2	0	0	0	0	0
IWB17983	31	5A	4.99	0	0	2	2	0	0	0	0	2	2	2	2	0	0	0	0	2	2	0	2	0	2	2	0	2	0	2	0	0	2	0	2	0	0	0	0	0	2	0	0	2	0	0	0	0	0
IWB61293	31	5A	6.11	0	0	2	2	0	0	0	0	2	2	2	2	0	0	0	0	2	2	0	2	0	2	2	0	2	0	2	0	0	2	0	2	0	0	0	0	2	2	0	0	2	0	0	0	0	0
IWB11865	31	5A	6.66	0	0	2	2	0	0	0	0	2	2	2	2	0	0	0	0	2	2	0	2	0	2	2	0	2	0	2	0	0	2	0	2	0	0	0	0	2	2	0	0	2	0	0	0	0	0
IWB21197	31	5A	7.21	0	0	2	2	0	0	0	0	2	0	2	2	0	0	0	0	2	2	0	2	0	2	2	0	2	0	2	0	0	2	0	2	0	0	0	0	2	2	0	0	2	0	0	0	0	0
IWB12854	31	5A	15.58	0	0	2	2	0	0	0	0	2	0	2	2	0	0	0	2	2	2	0	2	2	2	2	0	2	0	2	0	0	2	2	2	0	0	2	0	2	2	0	0	2	0	0	0	0	0
IWB6762	31	5A	16.13	0	0	2	2	0	0	0	0	2	0	2	2	0	0	0	2	2	2	0	2	2	2	2	0	2	0	2	0	0	2	2	2	0	0	2	0	2	2	0	0	2	0	0	0	0	0
IWB11972	31	5D	17.79	0	0	2	2	0	0	0	0	2	0	2	2	0	0	0	2	2	2	0	2	2	2	2	0	2	0	2	0	0	2	2	2	0	0	2	0	2	2	0	0	2	0	0	0	0	0
IWB29381	31	5A	24.46	0	0	2	2	0	0	0	0	2	0	2	2	0	0	0	2	2	2	0	2	2	2	2	0	2	0	2	0	0	2	2	2	0	0	2	0	2	2	0	0	2	0	0	0	0	0
IWB11052	31	5B	26.67	0	0	2	2	0	0	0	0	2	0	2	2	0	0	0	2	2	2	0	2	2	2	2	0	2	0	2	0	0	2	2	2	0	0	2	0	2	2	0	0	2	0	0	0	0	0
IWB8149	31	5A	30.54	0	0	2	2	0	0	0	0	2	0	2	2	0	2	0	2	2	2	0	2	2	2	2	0	2	0	2	0	0	2	2	2	0	0	2	0	2	2	0	0	2	0	0	0	0	0
IWB1462	31	5A	31.1	0	0	2	2	0	0	0	0	2	0	2	2	0	2	0	2	2	2	0	2	2	2	2	0	2	0	2	0	0	2	2	2	0	0	2	0	2	2	0	0	2	0	0	0	0	0
IWB4234	31	5A	34.97	0	0	2	2	0	0	0	0	2	0	2	2	0	2	0	2	2	2	0	2	2	0	2	0	2	0	2	0	0	2	2	2	0	0	2	0	2	2	0	0	2	0	0	0	2	0
IWB10965	31	5A	35.52	0	0	2	2	0	0	0	0	2	0	2	2	0	2	0	2	2	2	0	2	2	0	2	0	2	0	2	0	0	2	2	2	0	0	2	0	2	2	0	0	2	0	0	0	2	0
IWB9717	31	NA	36.63	0	0	2	2	0	0	0	0	2	0	2	2	0	2	0	2	2	2	0	2	2	0	2	0	2	0	2	0	0	2	2	2	0	0	2	0	2	2	0	0	2	0	0	0	2	0
IWB33011	32	5A	0	2	2	2	2	2	0	2	0	2	0	0	2	0	2	0	2	0	0	0	2	0	2	2	0	2	0	0	0	0	0	2	0	0	2	2	0	0	2	2	0	2	0	0	0	0	0
IWB3256	32	4B	21.71	2	2	2	2	2	0	2	0	2	0	0	2	0	2	0	2	0	0	0	2	0	2	2	0	2	0	2	2	2	0	2	2	0	2	2	0	2	2	2	0	2	0	2	0	0	0
IWB39067	32	4D	25.59	2	0	0	2	2	0	2	0	2	0	0	2	0	2	0	2	0	0	0	2	0	2	2	0	2	0	2	2	2	0	2	2	2	0	0	0	2	2	2	0	2	0	2	0	0	0
IWB46101	32	4D	26.7	2	0	0	2	2	0	2	-	2	0	0	2	0	2	0	2	0	0	0	2	0	2	2	0	2	0	2	2	2	0	2	2	0	0	2	0	2	2	2	0	2	0	2	0	0	0
IWB22876	32	NA	27.81	2	0	2	2	2	0	2	0	2	0	0	2	0	2	0	2	0	0	0	2	0	2	2	0	2	0	2	2	2	0	2	2	0	0	2	0	2	2	2	0	2	0	2	0	0	0
IWB21233	32	NA	28.91	2	2	2	2	2	0	2	0	2	0	0	2	0	2	0	2	0	0	0	2	0	2	2	0	2	0	2	2	2	0	2	2	0	2	2	0	2	2	2	0	2	0	2	0	0	0
IWB12723	32	NA	29.47	2	2	2	2	2	0	2	0	2	0	0	2	0	2	0	2	0	0	0	2	0	2	2	0	2	0	2	2	2	0	2	2	0	2	2	0	2	2	2	0	2	0	2	0	0	0
IWB23386	32	NA	31.12	2	2	2	2	2	0	2	0	2	0	0	2	0	0	0	2	0	0	0	2	0	2	2	0	2	0	2	2	2	0	2	2	0	2	2	0	2	2	2	0	2	0	2	0	0	0
IWB15523	32	4B	33.34	2	2	2	2	2	0	2	0	2	0	0	2	0	0	0	2	0	0	0	2	0	2	2	0	2	0	2	2	2	0	2	2	0	2	2	0	2	0	2	0	2	0	2	0	0	0
IWB67499	32	4B	33.89	2	2	2	2	2	0	2	0	2	0	0	2	0	0	0	2	0	0	0	2	0	2	2	0	2	0	2	2	2	0	2	2	0	2	2	0	2	0	2	0	2	0	2	0	0	0
IWB78054	32	4B	36.1	2	2	2	2	2	0	2	0	2	0	0	2	0	0	0	2	0	0	0	2	0	2	2	0	2	0	2	2	2	0	2	2	0	2	2	0	2	0	2	0	2	0	2	0	0	0
IWB6157	32	NA	36.65	2	2	2	2	2	0	2	0	2	0	0	0	0	0	0	2	0	0	0	2	0	2	2	0	2	0	2	2	2	0	2	2	0	2	2	0	2	0	2	0	2	0	2	0	0	0
IWB7958	32	4B	37.2	2	2	2	2	2	0	2	0	2	0	0	0	0	0	0	2	0	0	0	2	0	2	2	0	2	0	2	2	2	0	2	2	0	2	2	0	2	0	2	0	2	0	2	0	0	0
IWB32997	32	4B	42.19	2	2	2	2	2	0	2	0	0	0	0	0	0	0	0	2	0	0	0	2	0	2	2	0	2	0	2	2	0	0	0	2	0	2	2	2	2	0	2	0	2	0	2	0	0	0
IWB27444	32	5A	79.25	2	2	2	2	2	2	2	0	2	2	0	2	0	2	2	2	2	0	0	2	2	2	2	0	2	0	2	2	2	0	2	2	2	2	2	2	2	2	2	2	2	0	2	0	2	2
IWB10304	33	3B	0	0	0	0	0	2	0	2	0	2	0	0	2	0	2	0	2	0	2	0	2	2	0	0	0	2	0	0	2	2	2	2	0	0	0	2	2	0	2	2	0	0	0	2	0	2	2
IWB58481	33	3B	0.55	0	0	0	0	2	0	2	0	2	0	0	2	0	2	0	2	0	2	0	2	2	0	0	0	2	0	0	2	2	2	2	0	0	0	2	2	0	2	2	0	0	0	2	0	2	2
IWB40707	33	3B	2.21	0	0	0	0	2	0	2	0	2	0	0	2	0	2	2	2	0	2	0	2	2	0	0	0	2	0	0	2	2	2	2	0	0	0	2	2	0	2	2	0	0	0	2	0	2	2
IWB11049	33	3B	3.32	0	0	0	0	2	0	2	0	2	0	0	2	0	2	0	2	0	2	0	2	2	0	0	0	2	0	0	2	2	2	2	0	0	0	2	2	0	2	2	0	0	0	2	0	2	2
IWB22805	33	3B	3.87	0	0	0	0	2	0	2	0	2	0	0	2	0	2	0	2	0	2	0	2	2	0	0	0	2	0	0	2	2	2	2	0	0	0	2	2	0	2	2	0	0	0	2	0	2	2
IWB10839	33	3B	4.42	0	0	0	0	2	0	2	0	2	0	0	2	0	2	0	2	0	2	0	2	2	0	0	0	2	0	0	2	2	2	2	0	0	0	2	2	0	2	2	0	0	0	2	0	2	2
IWB18914	34	7D	0	0	2	2	2	0	0	0	2	2	2	2	0	2	2	2	0	0	0	2	0	2	2	0	2	0	2	2	2	2	2	2	2	2	2	2	2	0	0	2	2	2	2	2	2	0	2
IWB23802	34	7D	0.55	0	2	2	2	0	0	0	2	2	2	2	0	2	2	2	0	0	0	2	0	2	2	0	2	0	2	2	2	2	2	2	2	2	2	2	2	0	0	2	2	2	2	2	2	0	2
IWB4045	34	7D	6.66	0	2	2	2	0	2	2	2	2	2	2	0	2	2	2	0	0	0	2	0	2	2	2	2	0	2	2	2	2	2	2	2	2	2	2	2	0	0	2	2	2	2	2	2	0	2
IWB44453	34	7D	12.77	0	2	2	2	0	2	2	2	0	0	2	0	2	2	2	0	0	0	2	0	2	2	2	2	0	2	2	2	2	2	2	2	2	2	2	2	0	0	2	0	2	0	2	2	0	2
IWB40120	34	7B	16.09	0	2	2	2	0	2	2	2	0	0	2	0	2	2	2	0	0	0	2	0	2	2	2	2	0	2	2	2	2	2	2	2	2	2	0	2	0	0	2	0	2	0	2	2	0	2
IWB40232	34	7D	25.59	0	2	2	2	0	2	2	2	0	0	2	0	2	2	2	0	0	0	2	0	2	2	2	2	0	2	2	2	2	2	2	2	2	2	0	2	0	0	2	0	2	0	2	2	0	2
IWB44780	34	NA	26.7	0	2	2	2	0	2	2	2	0	0	2	0	2	2	2	0	0	0	2	0	2	2	2	2	0	2	2	2	2	2	2	2	2	2	0	2	0	0	2	0	2	0	2	2	0	2
IWB27602	34	7D	37.35	0	2	2	2	0	2	0	2	0	0	2	0	2	2	2	0	0	0	2	0	2	2	2	2	0	2	2	2	2	2	2	2	2	2	0	2	0	0	2	0	2	0	2	2	0	2
IWB42766	34	7D	37.91	0	2	2	2	0	2	0	2	0	0	0	0	2	2	2	0	0	0	2	0	2	2	2	2	0	2	2	2	2	2	2	2	2	2	0	2	0	0	2	0	2	0	2	2	0	2
IWB22212	34	7D	39.56	0	2	2	2	0	2	0	2	0	0	2	0	2	2	2	0	0	0	2	0	2	2	2	2	0	2	2	2	2	2	2	2	2	2	0	2	0	0	2	0	2	0	0	2	0	2
IWB46722	34	7D	40.12	0	2	2	2	0	2	0	2	0	0	2	0	2	2	2	0	0	0	2	0	2	2	2	2	0	2	2	2	2	2	2	2	2	2	0	2	0	0	2	0	2	0	0	2	0	2
IWB52211	34	7D	42.88	0	2	2	2	0	2	0	2	0	0	2	0	2	2	2	0	0	0	2	0	2	2	2	2	0	2	2	2	2	2	2	2	2	2	0	2	0	0	0	0	2	0	0	2	0	2
IWB76634	34	7D	46.2	0	2	2	2	0	2	0	2	0	0	2	0	2	2	2	0	0	0	2	0	0	2	2	2	0	2	2	2	2	2	2	2	2	2	2	0	0	0	0	0	2	0	0	2	0	2
IWB75011	34	NA	50.08	0	2	2	2	0	2	0	2	0	0	2	0	2	2	2	0	0	0	2	0	0	0	2	2	0	2	2	2	2	2	2	2	2	2	2	0	0	0	0	0	2	0	0	2	0	2
IWB17747	34	7D	55.62	0	2	0	2	0	2	0	2	0	0	0	0	2	2	2	2	0	0	2	0	0	0	2	2	0	2	2	2	2	2	2	2	2	2	2	0	0	0	0	0	2	0	0	2	0	2
IWB9578	34	NA	72.85	0	2	0	0	0	2	2	2	2	0	0	0	2	0	2	2	0	0	2	0	0	0	2	2	0	2	0	2	2	0	0	2	2	2	2	0	0	0	0	0	0	0	0	2	0	2
IWB29315	34	7A	100.87	2	0	0	0	0	2	2	0	2	0	0	2	0	0	2	2	0	0	0	2	2	0	0	0	2	0	0	2	0	2	0	2	2	0	2	0	0	0	0	0	0	0	0	0	0	0
IWB10582	35	1B	0	0	0	2	2	0	2	0	2	2	0	2	0	2	2	2	0	2	0	2	2	2	0	2	2	2	2	2	2	0	2	0	0	0	0	0	0	2	2	0	2	2	0	0	2	2	0
IWB31740	35	1B	0.55	0	0	2	2	0	2	0	2	2	0	2	0	2	2	2	0	2	0	2	2	2	0	2	2	2	2	2	2	0	2	0	0	0	0	0	0	2	2	0	2	2	0	0	2	2	0
IWB23772	35	1B	2.21	0	0	2	2	0	2	0	2	2	0	2	0	2	2	2	0	2	0	2	2	2	0	2	2	2	2	2	2	0	2	0	0	0	0	0	0	2	2	0	2	2	0	0	2	2	0
IWB26010	35	NA	2.76	0	0	2	2	0	2	0	2	2	0	2	0	2	2	2	0	2	0	2	2	2	0	2	2	2	2	2	2	0	2	0	0	0	0	0	0	2	2	2	2	2	0	0	2	2	0
IWB7868	35	1B	3.32	0	0	2	2	0	2	0	2	2	0	2	0	2	2	2	0	2	0	2	2	2	0	2	2	2	2	2	2	0	2	0	0	0	0	0	0	2	2	2	2	2	0	0	2	2	0
IWB78231	35	1B	4.97	2	0	2	2	0	2	0	2	2	0	2	0	2	2	2	0	2	0	2	2	2	0	2	2	2	2	2	2	0	2	0	0	0	0	0	0	2	2	2	2	2	0	0	2	2	0
IWB13172	35	1B	6.08	2	0	2	2	0	2	0	2	2	0	2	0	2	2	2	0	2	0	2	2	2	0	2	2	2	2	2	2	0	2	0	0	0	0	0	0	2	2	2	2	0	0	0	2	2	0
IWB3351	35	1A	7.74	2	0	2	2	0	2	0	2	2	0	2	0	2	2	2	0	2	0	2	2	2	0	2	2	2	2	2	2	0	2	0	0	0	0	0	0	2	2	2	2	0	0	0	2	2	0
IWB27085	35	1B	8.84	2	0	2	2	0	2	0	2	2	0	2	0	2	2	2	0	2	0	2	2	2	0	2	2	2	2	2	2	0	2	0	0	0	0	0	0	2	2	2	2	0	0	0	2	2	0
IWB29231	35	NA	10.5	2	0	2	2	0	2	0	2	2	0	2	2	2	2	2	0	2	0	2	2	2	0	2	2	2	2	2	2	0	2	0	0	0	0	0	0	2	2	2	2	0	0	0	2	2	0
IWB8096	35	1B	13.27	2	0	2	2	0	2	0	2	2	0	2	2	2	2	2	0	2	0	2	2	2	0	2	2	2	2	2	2	0	2	0	0	0	0	0	0	2	2	0	2	0	0	0	2	2	0
IWB11303	35	1B	18.25	2	0	2	2	0	2	0	0	2	0	2	2	0	2	2	0	2	0	2	2	2	0	2	0	2	2	2	2	0	2	0	0	0	0	0	0	0	2	0	2	0	0	0	0	2	0
IWB3021	35	1D	26.14	2	0	2	2	2	2	0	2	2	0	2	2	2	2	2	0	2	0	2	2	2	0	2	2	2	2	2	2	0	2	0	0	0	0	0	0	0	2	0	2	0	0	0	2	2	0
IWB72748	35	1B	26.7	2	0	2	2	2	2	0	2	2	0	2	2	2	2	2	0	2	0	2	2	2	0	2	2	2	2	2	2	0	2	0	0	0	0	0	0	0	2	0	2	0	0	0	2	2	0
IWB73657	35	1B	27.25	2	2	2	2	2	2	0	2	2	0	2	2	2	2	2	0	2	0	2	2	2	0	2	2	2	2	2	2	0	2	0	0	0	0	0	0	0	2	0	2	0	0	0	2	2	0
IWB35790	36	7A	0	0	2	2	2	0	0	0	0	2	2	0	0	0	0	0	0	2	2	2	2	2	0	0	0	2	2	2	0	2	0	2	0	2	2	0	2	0	0	2	2	0	0	2	0	0	0
IWB14567	36	7A	4.43	0	2	2	2	0	0	0	0	2	2	0	0	0	0	0	0	2	2	2	2	2	0	0	0	2	2	2	0	2	0	2	0	2	2	0	2	0	0	2	2	0	0	2	0	0	0
IWB39758	36	7A	4.98	0	2	2	2	0	0	0	0	2	2	0	0	0	0	0	0	2	2	2	2	2	0	0	0	2	2	2	0	2	0	2	0	2	2	0	2	0	0	2	2	0	0	2	0	0	0
IWB12020	36	7A	7.2	0	2	2	2	0	0	0	0	2	2	0	0	0	0	0	0	2	2	2	2	2	0	0	0	2	2	2	0	2	0	2	0	2	2	0	2	0	0	2	2	0	0	2	0	0	0
IWB7554	36	7A	19.01	0	0	2	2	0	0	0	0	2	2	0	2	0	0	0	0	2	2	0	2	2	0	0	0	2	0	2	0	2	0	2	0	2	0	2	2	0	0	2	2	0	0	2	0	0	0
IWB10719	36	7A	21.22	2	0	0	2	0	0	0	0	2	2	0	2	0	0	0	0	2	2	0	2	2	0	0	0	2	0	2	0	2	0	2	0	2	0	2	2	0	0	2	2	0	0	2	0	2	0
IWB34481	36	7A	22.33	2	0	0	2	0	0	0	0	2	2	0	2	0	0	0	0	2	2	0	2	2	0	0	0	2	0	2	0	2	0	2	0	2	0	2	2	0	0	2	2	0	0	2	0	2	0
IWB17704	36	7D	27.32	2	0	0	2	0	0	0	0	0	2	0	2	0	0	0	0	2	2	0	2	2	0	0	0	2	0	2	0	2	0	2	0	2	0	2	2	0	0	2	2	0	0	2	0	2	0
IWB2736	36	7A	27.87	2	0	0	2	0	0	0	0	0	2	0	2	0	0	0	0	2	2	0	2	2	0	0	0	2	0	2	0	2	0	2	0	2	0	2	2	0	0	2	2	0	0	2	0	2	0
IWB14901	36	7A	28.98	2	0	0	2	0	0	0	0	0	0	0	2	0	0	0	0	2	2	0	2	2	0	0	0	2	0	2	0	2	0	2	0	2	0	2	2	0	0	2	2	0	0	2	0	2	0
IWB72952	36	7A	29.53	2	0	0	2	0	0	0	0	0	0	0	2	0	0	0	0	2	2	0	2	2	0	0	0	2	0	2	0	2	0	2	0	2	0	2	2	0	0	2	2	0	0	2	0	2	0
IWB42939	36	NA	30.08	2	0	0	2	0	0	0	0	0	0	0	2	0	0	0	0	2	2	0	2	2	0	0	0	2	0	2	0	2	0	2	0	2	0	2	2	0	0	2	2	0	0	2	0	2	0
IWB25357	36	7A	31.19	2	0	0	2	0	0	0	0	0	0	0	2	0	0	0	0	2	2	0	2	2	0	0	0	2	0	2	0	2	0	2	0	2	0	2	2	0	0	2	2	0	0	2	0	2	0
IWB35860	36	7A	32.84	2	0	0	2	0	0	0	0	0	0	0	2	0	0	0	0	2	2	0	2	2	0	0	0	2	0	2	0	2	0	2	0	2	0	2	2	0	0	2	2	0	0	2	0	2	0
IWB10036	36	7A	33.4	2	0	0	2	0	0	0	0	0	0	0	2	0	0	0	0	2	2	0	2	2	0	0	0	2	0	2	0	2	0	2	0	2	0	2	2	0	0	2	2	0	0	2	0	2	0
IWB81002	36	7A	33.95	2	0	0	2	0	0	0	0	0	0	0	2	0	0	0	0	2	2	0	2	2	0	0	0	2	0	2	0	2	0	2	0	2	0	2	2	0	0	2	2	0	0	2	0	2	0
IWB21459	36	7A	37.82	2	0	0	2	0	0	0	0	0	0	0	2	0	0	0	0	2	2	0	2	2	0	0	0	2	0	2	0	2	0	2	0	2	0	2	0	0	0	2	2	0	0	0	0	2	0
IWB72573	36	7A	47.38	2	0	0	2	0	0	0	0	0	0	0	2	0	0	0	0	2	2	0	0	2	0	2	0	0	0	2	0	2	0	2	0	2	0	2	0	0	0	2	0	0	0	0	0	2	0
IWB13767	37	6D	0	0	0	2	0	0	0	0	2	2	0	2	0	2	2	0	2	2	0	2	2	0	0	0	2	2	2	0	0	0	2	0	0	2	0	0	0	2	0	2	0	2	0	0	2	2	2
IWB6212	37	6B	4.43	0	0	2	0	0	0	0	2	2	0	2	0	2	2	0	2	0	0	2	2	0	0	0	2	2	2	0	0	0	2	0	0	2	0	0	0	2	2	2	0	0	0	0	2	2	2
IWB4286	37	6D	8.31	0	0	2	0	0	0	0	2	2	0	2	0	2	2	0	2	2	0	2	2	0	0	0	2	2	2	0	0	0	2	0	0	2	0	0	0	2	2	2	0	0	0	0	2	2	2
IWB30767	37	6D	8.86	0	0	2	0	0	0	0	2	2	0	2	0	2	2	0	2	2	0	2	2	0	0	0	2	2	2	0	0	0	2	0	0	2	0	0	0	2	2	2	0	0	0	0	2	2	2
IWB22780	37	6B	9.41	0	0	2	0	0	0	0	2	2	0	2	0	2	2	0	2	2	0	2	2	0	0	0	2	2	2	0	0	0	2	0	0	2	0	0	0	2	2	2	0	0	0	0	2	2	2
IWB13079	38	4D	0	0	2	0	0	2	0	2	0	0	0	0	2	0	0	2	0	0	2	0	0	2	0	0	0	0	0	0	0	0	2	0	2	2	2	2	2	0	0	2	2	2	2	0	0	2	2
IWB80153	38	4D	6.67	0	2	2	0	2	0	2	0	0	0	0	2	0	0	2	0	0	0	0	0	2	0	0	0	0	0	0	0	0	2	0	2	2	2	2	2	0	0	2	2	2	2	0	0	2	2
IWB19222	38	4D	26.42	0	2	2	2	2	0	0	0	0	0	0	2	0	0	0	0	0	0	0	0	2	0	2	0	0	0	2	0	0	2	2	2	2	2	0	2	0	0	2	2	0	2	0	0	0	2
IWB7164	38	4D	49.47	0	0	2	2	2	2	0	0	0	0	2	2	0	0	0	0	0	0	0	2	2	2	2	0	2	0	2	0	0	2	2	2	2	0	0	0	0	0	2	0	0	2	0	0	0	2
IWB33071	38	4D	55.58	0	0	2	2	2	2	0	0	0	0	2	2	0	2	0	0	0	0	0	2	2	2	2	0	2	0	2	0	0	2	2	2	2	0	0	0	0	0	2	0	0	2	0	0	0	2
IWB10207	38	4D	56.69	0	0	2	2	2	2	0	0	0	0	2	2	0	2	0	0	0	0	0	2	2	2	2	0	2	0	2	0	0	2	2	2	2	0	0	0	0	0	2	0	0	2	2	0	0	2
IWB10053	38	4D	58.9	0	0	2	2	2	2	0	0	0	0	2	2	0	2	0	0	0	0	0	2	2	0	2	0	2	0	2	0	0	2	2	2	2	0	0	0	0	0	2	0	0	2	2	0	0	2
IWB32930	38	4A	60	0	0	2	2	2	2	0	0	0	0	2	2	0	2	0	0	0	0	0	2	2	0	2	0	2	0	2	0	0	2	2	2	2	0	0	0	0	0	2	0	0	2	2	0	0	2
IWB23921	38	4D	68.37	0	2	2	2	2	2	0	0	0	0	2	2	0	2	0	0	0	0	0	2	2	2	0	0	2	0	2	0	0	2	2	2	2	2	0	0	0	0	2	0	0	2	2	0	0	2
IWB33090	38	4D	68.92	0	2	2	2	2	2	0	0	0	0	2	2	0	2	0	0	0	0	0	2	2	2	0	0	2	0	2	0	0	2	2	2	2	2	0	0	0	0	2	0	0	2	2	0	0	2
IWB49801	38	4D	81.32	0	2	2	2	2	2	0	0	0	0	2	2	0	2	2	2	0	0	0	2	2	2	0	0	2	0	2	0	0	2	2	2	2	2	0	0	0	0	0	0	0	2	2	0	2	2
IWB16727	39	6D	0	2	0	0	2	2	0	0	0	0	0	2	0	0	2	0	0	0	2	0	0	0	2	2	0	0	0	2	0	2	0	0	2	0	0	0	2	2	0	2	0	0	0	2	0	2	0
IWB75474	39	6D	0.55	2	0	0	2	2	0	0	0	0	0	2	0	0	2	0	0	0	2	0	0	0	2	2	0	0	0	2	0	2	0	0	2	0	0	0	2	2	0	2	0	0	0	2	0	2	0
IWB76412	39	6D	2.76	2	0	0	2	2	0	0	0	0	0	2	0	0	2	0	0	0	2	2	0	0	2	2	0	0	2	2	0	2	0	0	2	0	0	0	2	2	0	2	0	0	0	2	0	2	0
IWB48840	39	6D	3.32	2	0	0	2	2	0	0	0	0	0	2	0	0	2	0	0	0	2	2	0	0	2	2	0	0	2	2	0	2	0	0	2	0	0	0	2	2	0	2	0	0	0	2	0	2	0
IWB24903	39	6D	3.87	2	0	0	2	2	0	0	0	0	0	2	0	0	2	0	0	0	2	2	0	0	2	2	0	0	2	2	0	2	0	0	2	0	0	0	2	2	0	2	0	0	0	2	0	2	0
IWB29056	39	6D	15.17	2	0	0	2	2	0	0	0	0	0	2	0	0	2	0	2	0	2	2	0	0	2	2	0	0	2	2	0	2	0	0	2	0	0	0	2	2	0	2	0	0	0	2	0	2	0
IWB35343	39	6A	19.62	2	0	0	2	2	2	0	0	0	0	2	0	0	2	0	2	0	2	2	0	0	2	2	0	0	2	2	0	2	0	0	2	2	0	0	2	2	0	2	2	0	0	2	0	2	0
IWB11508	39	6D	20.18	2	0	0	2	2	2	2	0	0	0	2	0	0	2	0	2	0	2	2	0	0	2	2	0	0	2	2	0	2	0	0	2	2	0	0	2	2	0	2	2	0	0	2	0	2	0
IWB6432	39	NA	20.73	2	0	0	2	2	2	2	0	0	0	2	0	0	2	0	2	2	2	2	0	0	2	2	0	0	2	2	0	2	0	0	2	2	0	0	2	2	0	2	2	0	0	2	0	2	0
IWB13131	40	6D	0	2	2	0	2	2	0	2	2	0	0	2	0	2	2	0	2	0	2	2	0	2	2	0	2	0	2	2	2	2	2	0	0	2	2	2	2	2	2	0	2	0	0	2	2	0	0
IWB6782	40	6D	7.8	2	2	0	2	2	0	2	2	0	0	2	0	2	2	2	2	0	2	2	0	2	0	0	2	0	2	0	2	2	2	0	0	2	2	2	2	2	2	0	2	0	0	2	2	0	0
IWB16170	40	6D	9.46	2	2	0	2	2	0	2	2	0	0	2	0	2	2	2	2	0	2	2	0	2	0	0	2	0	2	0	2	2	2	0	0	2	2	2	2	2	2	0	2	0	0	2	2	0	0
IWB579	40	6D	11.11	2	2	0	2	2	0	2	2	0	0	2	0	2	2	2	2	0	2	2	2	2	0	0	2	2	2	0	2	2	2	0	0	2	2	2	2	2	2	0	2	0	0	2	2	0	0
IWB35491	40	6D	11.67	2	2	0	2	2	0	2	2	0	0	2	0	2	2	2	2	0	2	2	2	2	0	0	2	2	2	0	2	2	2	0	0	2	2	2	2	2	2	0	2	0	0	2	2	0	0
IWB75773	40	6D	13.88	2	2	0	2	2	0	2	2	0	0	2	0	2	2	2	2	0	2	2	2	2	0	0	2	2	2	0	2	2	2	0	0	2	2	2	2	2	2	0	2	0	0	2	2	0	0
IWB36482	40	6D	17.22	2	2	0	2	2	0	2	0	0	0	2	0	0	2	2	2	0	2	2	2	2	0	0	0	2	2	0	2	2	2	0	0	2	2	2	2	2	2	0	2	0	0	2	0	0	0
IWB15498	40	NA	18.33	2	2	0	2	2	0	2	0	0	0	2	0	0	2	2	2	0	2	2	2	2	0	0	0	2	2	0	2	2	2	0	0	2	2	2	2	2	2	0	2	0	0	2	0	0	0
IWB1752	41	6B	0	0	2	0	0	2	0	2	0	0	2	0	0	0	2	0	2	0	0	0	0	0	0	2	0	0	0	0	2	0	0	2	0	2	2	0	2	2	0	0	2	0	2	0	0	0	0
IWB61321	41	6B	23.73	0	2	0	0	2	0	2	2	0	2	0	0	2	2	0	2	0	0	0	2	0	0	2	2	2	0	0	2	0	2	2	2	2	2	2	2	2	0	0	2	2	2	2	2	0	0
IWB75959	41	6B	32.15	0	2	2	0	2	0	2	2	0	2	0	0	2	2	0	2	0	0	0	2	0	2	2	2	2	0	0	2	0	2	2	2	2	2	2	2	2	0	0	2	2	2	2	2	0	0
IWB29280	41	6B	36.6	0	2	2	0	2	0	2	2	0	2	0	0	2	2	0	2	0	0	0	2	0	2	2	2	2	0	0	2	0	2	2	0	2	2	2	2	2	0	0	2	2	2	2	2	0	0
IWB59376	41	6D	37.16	0	2	2	0	2	0	2	2	0	2	0	0	2	2	0	2	2	0	0	2	0	2	2	2	2	0	0	2	0	2	2	0	2	2	2	2	2	0	0	2	2	2	2	2	0	0
IWB21062	41	6B	37.71	0	2	2	0	2	0	2	2	0	2	0	0	2	2	0	2	2	0	0	2	0	2	2	2	2	0	0	2	0	2	2	0	2	2	2	2	2	0	0	2	2	2	2	2	0	0
IWB56602	41	NA	39.37	0	2	2	0	2	0	2	2	0	2	0	0	2	2	0	2	2	0	0	0	0	2	2	2	0	0	0	2	0	2	2	0	2	2	2	2	2	0	0	2	2	2	2	2	0	0
IWB3172	41	6B	43.8	0	2	2	0	2	0	2	0	0	2	0	0	0	2	0	2	2	0	0	0	0	2	2	0	0	0	0	2	0	2	2	0	2	2	2	2	2	0	0	2	2	2	2	2	0	0
IWB47518	41	NA	44.91	0	2	2	0	2	0	2	0	0	2	0	0	0	2	0	2	2	0	0	0	0	2	2	0	0	0	0	2	0	2	2	0	2	2	2	2	2	0	0	2	2	2	2	0	0	0
IWB10059	41	1B	45.46	0	2	2	0	2	0	2	0	0	2	0	0	0	2	0	2	2	0	0	0	0	2	2	0	0	0	0	2	0	2	2	0	2	2	2	2	2	0	0	2	2	2	2	0	0	0
IWB57363	41	NA	47.12	0	2	2	0	2	0	2	0	0	2	0	0	0	2	0	2	2	0	0	0	0	2	2	0	0	0	0	2	0	2	2	0	2	2	2	0	2	0	0	2	2	2	2	0	0	0
IWB28700	41	NA	70.17	0	2	2	2	2	0	2	0	2	2	2	2	0	2	0	2	2	2	0	2	2	2	2	0	2	0	2	2	0	2	2	2	2	2	2	2	2	2	0	2	2	2	2	0	2	0
IWB27049	41	NA	100.48	0	2	2	0	2	0	2	2	2	2	0	0	2	2	0	2	2	2	0	2	0	2	2	2	2	0	2	2	0	2	2	2	2	2	2	2	2	0	2	2	2	2	2	2	0	0
IWB43255	42	6A	0	0	0	0	2	2	0	0	0	2	0	0	0	0	0	0	0	0	0	0	0	0	0	0	0	0	0	0	2	0	2	0	0	0	0	0	2	2	0	0	0	0	0	2	0	2	0
IWB71928	42	7A	21.71	0	0	0	2	2	0	0	0	0	0	0	0	0	0	0	0	0	0	0	0	0	0	0	0	0	0	0	0	0	0	0	0	2	0	0	2	2	0	0	0	0	0	0	0	0	0
IWB71932	42	7A	22.26	0	2	0	2	2	0	0	0	0	0	0	0	0	0	0	0	0	0	0	0	0	0	0	0	0	0	0	0	0	0	0	0	2	0	0	2	2	0	0	0	0	0	0	0	0	0
IWB11258	42	6A	48.82	0	0	0	2	2	0	0	0	0	0	0	0	0	0	0	0	0	0	0	0	0	0	2	0	0	0	0	0	0	0	0	0	0	0	0	2	2	0	0	0	0	0	0	0	0	0
IWB65574	42	5D	82.37	0	0	0	0	0	0	0	0	0	0	0	0	0	0	0	0	0	0	0	0	0	0	0	0	0	0	0	0	0	0	0	0	0	0	0	0	0	0	0	0	0	0	0	0	0	0
IWB16164	42	7D	111.9	0	0	0	0	0	0	0	0	2	0	0	0	0	0	0	0	2	0	0	0	0	2	0	0	0	0	0	0	0	0	2	0	0	0	0	0	2	0	0	0	2	0	0	0	0	0
IWB11456	42	NA	158.7	0	0	0	0	0	0	0	2	2	0	0	0	2	2	2	0	2	0	0	0	0	0	0	2	0	0	0	0	0	2	0	2	0	0	0	2	2	0	0	0	0	0	0	2	2	0
IWB50384	42	NA	159.81	0	0	0	0	0	2	0	2	2	0	0	0	2	2	2	0	2	0	0	0	0	0	0	2	0	0	0	0	0	2	0	2	0	0	0	2	2	0	0	0	0	0	0	2	2	0
IWB21691	42	2B	198.1	0	0	0	0	0	2	0	2	0	2	0	2	2	0	2	0	0	0	0	0	2	0	0	2	0	0	0	0	0	0	0	2	2	0	0	0	2	0	0	0	2	2	2	2	2	0
IWB24899	43	4D	0	0	2	0	0	0	2	0	0	2	0	2	2	0	0	2	0	0	0	2	2	0	2	0	0	2	2	0	0	0	2	0	2	0	2	2	0	0	0	0	0	0	0	0	0	2	0
IWB34423	43	4D	1.11	0	2	0	0	0	2	0	0	2	0	2	2	0	0	2	0	0	0	2	2	0	2	0	0	2	2	0	0	0	2	0	2	0	2	2	0	0	0	0	0	0	0	0	0	2	0
IWB49180	43	4D	12.92	0	2	0	0	0	2	0	0	0	0	2	2	0	0	2	0	0	0	2	2	2	2	0	0	2	2	0	0	0	2	0	2	2	2	2	0	0	0	0	0	0	0	0	0	2	2
IWB35432	44	3D	0	0	2	2	0	2	0	2	2	0	0	0	2	2	0	0	2	2	2	2	0	0	2	0	2	0	2	0	0	0	0	0	2	2	2	0	2	2	2	2	2	2	0	2	2	0	0
IWB63148	44	3D	1.11	0	2	2	0	2	0	2	2	0	0	0	2	2	0	0	2	2	2	2	0	0	2	0	2	0	2	0	0	0	0	0	2	2	2	0	2	2	2	2	2	2	0	2	2	0	0
IWB56510	44	3D	4.42	0	2	0	0	2	2	2	2	0	0	0	2	2	0	0	2	2	2	2	0	0	2	0	2	0	2	0	0	0	0	0	2	2	2	0	2	2	2	2	2	2	0	2	2	0	0
IWB8648	44	3D	12.22	0	2	0	0	2	2	2	2	0	0	0	2	2	0	0	2	2	2	2	0	0	2	0	2	0	2	0	0	0	0	0	0	2	2	2	0	2	2	2	2	0	0	2	2	2	0
IWB2068	44	3D	21.16	0	0	0	0	2	2	2	0	0	2	0	2	0	0	0	2	2	2	2	0	0	2	0	0	0	2	0	2	2	0	0	0	2	0	2	0	2	2	2	2	0	0	2	0	0	0
IWB11834	44	3D	24.48	0	0	0	0	2	2	2	0	0	2	0	2	0	0	0	2	2	2	2	0	0	2	0	0	0	2	0	2	2	0	0	0	0	0	2	0	0	2	2	2	0	0	2	0	0	2
IWB4562	44	3D	26.13	0	0	0	0	2	2	2	0	2	2	0	2	0	0	0	2	2	2	2	0	0	2	0	0	0	2	0	2	2	0	2	0	0	0	2	0	0	2	2	2	0	0	2	0	0	2
IWB1287	44	3D	27.24	0	2	0	0	2	2	2	0	2	2	0	2	0	0	0	2	2	2	2	0	0	2	0	0	0	2	0	2	2	0	2	0	0	2	2	0	0	2	2	2	0	0	2	0	0	2
IWB39990	44	3D	30	0	2	0	0	2	2	2	0	2	2	0	2	0	0	0	2	2	2	2	0	0	2	0	0	0	2	0	2	2	0	2	0	0	2	2	0	0	2	2	2	0	0	2	0	0	2
IWB11852	45	3A	0	0	0	0	0	0	2	2	0	2	2	0	0	0	2	0	2	2	0	0	0	2	2	2	0	0	0	2	2	2	2	0	2	2	0	2	2	2	0	0	2	0	2	0	0	0	0
IWB13817	45	3A	1.66	0	0	0	0	0	2	2	0	2	2	0	0	0	2	0	2	2	0	0	0	2	2	2	0	0	0	2	2	2	2	0	2	2	0	2	2	2	0	0	2	0	2	0	0	0	0
IWB58388	46	5D	0	0	2	0	0	0	0	2	0	2	0	2	2	0	2	2	2	2	2	2	2	0	0	0	0	2	2	2	0	2	2	0	2	0	2	2	0	0	2	2	0	0	0	0	0	0	2
IWB7620	46	5D	3.88	2	2	0	0	0	0	2	0	2	0	2	2	0	2	2	2	2	2	2	2	0	0	0	0	2	2	2	0	2	2	0	2	0	2	2	0	0	2	2	0	0	0	0	0	0	2
IWB63558	46	5D	15.11	2	2	0	2	0	0	2	2	2	0	2	2	2	2	0	2	2	2	2	2	0	2	0	2	2	2	2	0	2	2	0	2	0	2	2	0	0	0	2	2	0	0	0	2	0	2
IWB17912	46	5D	18.43	2	2	0	2	0	0	2	2	2	2	2	2	2	2	0	2	2	2	2	2	0	2	0	2	2	2	2	0	2	2	0	2	0	2	2	0	0	0	2	0	0	0	0	2	0	2
IWB34466	46	NA	24.01	2	2	0	2	0	0	2	2	2	2	2	2	2	2	0	2	2	2	2	2	0	2	0	2	2	2	0	0	2	2	0	2	0	2	2	0	0	0	2	0	0	0	0	2	0	2
IWB5189	46	NA	29.68	2	2	0	2	0	0	2	2	2	2	2	2	2	2	0	2	2	2	2	2	0	2	0	2	2	2	0	0	2	2	0	2	0	2	2	0	0	0	2	0	0	0	0	2	0	2
IWB11256	46	5D	36.47	2	2	0	2	0	0	2	2	2	2	2	2	2	2	0	2	2	2	2	2	0	2	0	2	2	2	0	0	2	2	0	2	0	2	2	0	0	0	2	2	0	0	0	2	0	2
IWB49479	46	5D	38.12	2	2	0	2	0	0	2	2	2	2	2	2	2	2	0	2	2	2	2	2	0	2	0	2	2	2	0	0	2	2	0	2	0	2	2	0	0	0	2	2	2	0	0	2	0	2
IWB27086	47	5D	0	0	0	0	2	2	2	0	0	2	2	2	2	0	2	0	2	2	0	2	2	2	0	0	0	2	2	0	2	0	2	2	0	2	0	0	0	0	2	0	2	2	2	0	0	2	0
IWB780	47	5D	3.32	0	0	0	2	2	2	0	0	2	2	2	2	0	2	0	2	2	0	2	2	2	0	0	0	2	2	0	2	0	2	2	0	2	0	0	0	0	0	0	2	2	2	0	0	2	0
IWB21806	47	5A	16.9	2	0	0	2	0	2	0	0	2	0	2	2	0	2	0	2	0	2	2	2	2	0	0	0	2	2	0	2	0	2	2	0	2	0	2	0	0	2	0	2	2	2	0	0	0	0
IWB79949	47	5D	28.72	2	0	0	2	0	2	0	0	0	0	2	2	0	2	0	2	0	2	2	2	2	0	0	0	2	2	0	2	0	2	2	0	0	0	2	0	0	2	0	2	2	0	0	0	0	0
IWB34503	47	5D	44.72	0	0	0	0	2	2	0	0	0	0	0	2	0	2	2	2	0	2	2	0	0	0	0	0	0	2	0	0	0	0	0	0	0	0	2	0	0	2	0	0	2	0	0	0	0	0
IWB52329	47	5D	46.93	0	0	0	0	2	2	0	2	0	0	0	2	2	2	2	2	0	2	2	0	0	0	0	2	0	2	0	0	0	0	0	0	0	0	2	0	0	2	0	0	2	0	0	2	0	0
IWB35889	47	5D	57.58	0	0	0	0	2	2	0	0	0	0	0	2	0	2	2	2	0	2	2	2	0	2	0	0	2	2	0	0	0	0	0	0	0	0	2	0	0	2	0	0	2	0	0	0	0	0
IWB22695	47	5D	72.36	0	2	0	2	2	2	2	0	2	0	0	2	0	2	2	2	2	2	2	2	0	0	0	0	2	2	2	0	0	0	0	2	0	2	2	0	0	2	0	0	2	0	0	0	0	2
IWB50554	47	NA	76.87	-	2	0	0	2	2	2	0	2	0	0	2	0	2	2	2	2	2	-	2	0	0	0	0	2	2	2	0	0	0	0	2	0	2	2	0	0	2	0	0	2	0	0	0	0	2
IWB71674	47	1B	107.03	0	2	0	0	0	2	0	0	0	0	0	2	0	2	2	0	0	0	0	2	0	0	0	0	2	0	2	0	0	0	0	2	0	2	2	0	0	0	0	0	0	0	0	0	0	2
IWB10908	48	1B	0	2	2	2	2	0	2	0	0	2	2	2	0	0	2	2	0	2	0	0	2	2	2	0	0	2	0	0	2	0	0	0	0	2	2	0	2	0	0	0	0	2	2	2	0	0	0
IWB11788	48	1B	7.8	2	2	2	2	0	0	0	0	2	2	2	0	0	2	2	0	2	0	2	2	2	2	0	0	2	2	0	2	0	0	0	0	2	2	0	0	0	0	0	0	2	2	2	0	0	0
[truncated: 135 more columns]

## Sheet: Appendix  B
Appendix B: The genotype and genetic map of developed Kasp markers on chromosomes 7DS
locus_name	cM_Kosambi	29001	29002	29003	29004	29005	29006	29007	29009	29010	29011	29012	29013	29014	29015	29016	29017	29018	29019	29020	29021	29022	29023	29024	29025	29026	29027	29028	29029	29030	29031	29032	29033	29034	29035	29036	29037	29038	29039	29040	29041	29042	29043	29044	29045	29046	29047	29048	29049
Kasp11637	0	0	2	2	2	2	0	0	2	0	0	0	2	2	2	0	0	0	0	2	0	0	0	0	2	0	2	0	2	2	0	2	2	2	2	2	2	0	2	2	0	2	2	0	2	2	2	0	2
Kasp42075	28.97	0	2	2	0	0	0	0	2	2	2	2	0	2	2	0	0	0	0	2	0	2	0	0	2	0	2	2	2	2	2	2	2	2	2	2	2	0	2	2	0	2	0	2	2	2	2	0	2
Kasp51953	36.9	0	2	2	2	0	0	0	2	2	2	2	0	2	2	2	0	0	0	2	0	2	2	0	2	0	2	2	2	2	2	2	2	2	2	2	2	0	2	2	0	2	2	2	2	0	2	0	2
Kasp59738	40.26	0	2	2	2	0	0	0	2	2	2	2	0	2	2	2	0	0	0	2	0	2	2	0	2	0	2	2	2	2	2	2	2	2	2	2	2	0	0	2	0	2	2	2	2	0	2	0	2
Kasp62215	42.52	0	2	2	2	0	2	0	2	2	2	2	0	2	2	2	0	0	0	2	0	2	2	0	2	0	2	2	2	2	2	2	2	2	2	2	2	0	0	2	0	2	2	2	2	0	2	0	2
Kasp66074	48.2	0	2	2	2	0	2	2	2	2	2	2	0	2	2	2	0	0	0	2	0	2	2	2	2	0	2	2	2	2	2	2	2	2	2	2	2	0	0	2	0	2	2	2	2	0	2	0	2
IWB4045	49.88	0	2	2	2	0	2	2	2	2	2	2	0	2	2	2	0	0	0	2	0	2	2	2	2	0	2	2	2	2	2	2	2	2	2	2	2	0	0	2	2	2	2	2	2	0	2	0	2
Kasp71343	52.45	0	-	2	2	0	2	2	2	2	2	2	0	2	2	2	0	0	0	2	0	2	2	2	2	0	2	2	2	2	2	2	2	2	2	2	2	0	0	2	0	2	0	2	2	0	2	0	2
IWB40120	64.96	0	2	2	2	0	2	2	2	0	0	2	0	2	2	2	0	0	0	2	0	2	2	2	2	0	2	2	2	2	2	2	2	2	2	0	2	0	0	2	0	2	0	2	2	0	2	0	2
IWB40232	74.46	0	2	2	2	0	2	2	2	0	0	2	0	2	2	2	0	0	0	2	0	2	2	2	2	0	2	2	2	2	2	2	2	2	2	0	2	0	0	2	0	2	0	2	2	0	2	0	2
IWB44780	75.57	0	2	2	2	0	2	2	2	0	0	2	0	2	2	2	0	0	0	2	0	2	2	2	2	0	2	2	2	2	2	2	2	2	2	0	2	0	0	2	0	2	0	2	2	0	2	0	2
IWB42766	86.8	0	2	2	2	0	2	0	2	0	0	0	0	2	2	2	0	0	0	2	0	2	2	2	2	0	2	2	2	2	2	2	2	2	2	0	2	0	0	2	0	2	0	2	2	0	2	0	2
IWB22212	88.46	0	2	2	2	0	2	0	2	0	0	2	0	2	2	2	0	0	0	2	0	2	2	2	2	0	2	2	2	2	2	2	2	2	2	0	2	0	0	2	0	2	0	0	2	0	2	0	2
IWB46722	89.01	0	2	2	2	0	2	0	2	0	0	2	0	2	2	2	0	0	0	2	0	2	2	2	2	0	2	2	2	2	2	2	2	2	2	0	2	0	0	2	0	2	0	0	2	0	2	0	2
IWB52211	91.78	0	2	2	2	0	2	0	2	0	0	2	0	2	2	2	0	0	0	2	0	2	2	2	2	0	2	2	2	2	2	2	2	2	2	0	2	0	0	0	0	2	0	0	2	0	2	0	2
IWB76634	95.1	0	2	2	2	0	2	0	2	0	0	2	0	2	2	2	0	0	0	2	0	0	2	2	2	0	2	2	2	2	2	2	2	2	2	2	0	0	0	0	0	2	0	0	2	0	2	0	2
[truncated: 133 more columns]

## Sheet: Appendix C
Appendix C: Cadmium content (mg kg-1) in doubled haploid lines (DHLs) in four field trials.
	18SSCd	18ASCd	17ASCd	17SSCd
29001	0.114	0.0925	0.1085	0.14
29002	0.0845	0.0725	0.0905	0.109
29003	0.08	0.093	0.133	0.1135
29004	0.09	0.086	0.128	0.084
29005	0.138	0.109	0.157	0.124
29006	0.074	0.081	0.131	0.061
29007	0.073	0.088	0.122	0.091
29009	0.056	0.101	0.077	0.107
29010	0.068	0.078	0.138	0.066
29011	0.079	0.061	0.121	0.073
29012	0.068	0.074	0.122	0.071
29013	0.069	0.064	0.115	0.086
29014	0.068	0.066	0.098	0.062
29015	0.0775	0.0795	0.0855	0.067
29016	0.063	0.075	0.113	0.0785
29017	0.041	0.097	0.098	0.092
29018	0.088	0.072	0.096	0.122
29019	0.072	0.095	0.139	0.1
29020	0.066	0.073	0.123	0.061
29021	0.082	0.069	0.114	0.1
29022	0.082	0.078	0.096	0.102
29023	0.088	0.074	0.116	0.11
29024	0.079	0.082	0.11	0.153
29025	0.062	0.077	0.09	0.139
29026	0.058	0.079	0.1085	0.135
29027	0.082	0.09	0.148	0.1175
29028	0.053	0.079	0.129	0.097
29029	0.076	0.084	0.137	0.131
29030	0.069	0.077	0.111	0.099
29031	0.073	0.105	0.142	0.12
29032	0.081	0.09	0.11	0.125
29033	0.074	0.091	0.133	0.122
29034	0.088	0.093	0.12	0.089
29035	0.093	0.071	0.099	0.122
29036	0.06	0.09	0.108	0.062
29037	0.067	0.087	0.113	0.126
29038	0.057	0.075	0.128	0.083
29039	0.13	0.09	0.15	0.109
29040	0.072	0.0685	0.1175	0.119
29041	0.082	0.079	0.108	0.1295
29042	0.075	0.094	0.149	0.178
29043	0.122	0.11	0.12	0.127
29044	0.054	0.07	0.101	0.123
29045	0.06	0.07	0.098	0.107
29046	0.073	0.085	0.128	0.143
29047	0.116	0.088	0.091	0.165
29048	0.106	0.085	0.116	0.134
29049	0.067	0.097	0.121	0.088
29050	0.12	0.104	0.149	0.108
29051	0.097	0.103	0.124	0.141
29052	0.106	0.1175	0.129	0.106
29054	0.094	0.087	0.126	0.129
29055	0.082	0.069	0.107	0.078
29056	0.098	0.101	0.117	0.075
29057	0.093	0.09	0.134	0.119
29058	0.088	0.104	0.122	0.129
29059	0.0825	0.089	0.1345	0.081
29060	0.069	0.07	0.097	0.0575
29061	0.063	0.087	0.112	0.073
29062	0.072	0.075	0.104	0.072
29063	0.062	0.08	0.117	0.09
29064	0.064	0.07	0.088	0.099
29065	0.048	0.086	0.098	0.142
29066	0.079	0.126	0.116	0.105
29067	0.05	0.09	0.096	0.094
29068	0.055	0.079	0.115	0.09
29069	0.079	0.088	0.105	0.081
29070	0.0735	0.0905	0.1055	0.102
29071	0.053	0.078	0.1	0.096
29072	0.095	0.104	0.133	0.1445
29073	0.074	0.085	0.119	0.095
29074	0.085	0.125	0.14	0.095
29075	0.04	0.09	0.122	0.101
29076	0.069	0.072	0.139	0.117
29077	0.079	0.088	0.135	0.137
29078	0.077	0.088	0.139	0.131
29079	0.095	0.1	0.131	0.136
29080	0.057	0.107	0.136	0.116
29081	0.102	0.1	0.143	0.093
29082	0.0585	0.096	0.124	0.088
29083	0.084	0.093	0.123	0.107
29084	0.076	0.118	0.125	0.12
29085	0.055	0.109	0.132	0.122
29086	0.095	0.109	0.155	0.141
29087	0.081	0.109	0.124	0.093
29088	0.079	0.092	0.133	0.07
29089	0.065	0.116	0.155	0.139
29090	0.104	0.103	0.118	0.083
29091	0.116	0.103	0.125	0.114
29092	0.074	0.098	0.13	0.115
29093	0.091	0.101	0.138	0.166
29094	0.074	0.09	0.13	0.153
29097	0.089	0.094	0.181	0.129
29098	0.072	0.109	0.104	0.085
29099	0.118	0.115	0.13	0.132
29100	0.087	0.1175	0.119	0.065
29101	0.082	0.108	0.116	0.076
29102	0.081	0.108	0.089	0.096
29103	0.061	0.094	0.078	0.068
29104	0.076	0.096	0.11	0.085
29105	0.051	0.087	0.108	0.069
29106	0.072	0.106	0.141	0.089
29107	0.088	0.084	0.107	0.093
29108	0.081	0.109	0.151	0.101
29109	0.06	0.081	0.109	0.071
29110	0.064	0.097	0.1275	0.062
29111	0.076	0.115	0.145	0.079
29112	0.088	0.112	0.154	0.083
29113	0.098	0.095	0.12	0.074
29114	0.059	0.092	0.137	0.072
29115	0.076	0.1	0.132	0.08
29116	0.074	0.111	0.138	0.084
29117	0.078	0.114	0.109	0.073
29119	0.092	0.109	0.1	0.097
29120	0.138	0.115	0.179	0.131
29121	0.077	0.104	0.092	0.088
29122	0.0745	0.0845	0.098	0.079
29123	0.078	0.11	0.118	0.087
29124	0.041	0.079	0.093	0.079
29125	0.095	0.087	0.1	0.084
29126	0.094	0.097	0.107	0.098
29127	0.096	0.106	0.157	0.119
29128	0.077	0.112	0.144	0.101
29129	0.061	0.103	0.131	0.114
29130	0.0745	0.116	0.147	0.105
29131	0.05	0.098	0.083	0.0625
29132	0.062	0.105	0.129	0.07
29133	0.033	0.076	0.104	0.077
29134	0.08	0.103	0.134	0.125
29135	0.095	0.115	0.1355	0.12
29136	0.069	0.124	0.136	0.142
29137	0.056	0.108	0.117	0.125
29138	0.063	0.081	0.08	0.102
29139	0.073	0.084	0.092	0.0775
29140	0.083	0.12	0.149	0.151
29142	0.078	0.114	0.117	0.151
29143	0.091	0.107	0.12	0.086
29144	0.0745	0.118	0.172	0.134
29145	0.097	0.126	0.137	0.1
29146	0.077	0.122	0.094	0.106
29147	0.074	0.073	0.072	0.088
29148	0.061	0.092	0.116	0.075
29149	0.077	0.086	0.107	0.124
29152	0.09	0.099	0.094	0.125
29153	0.054	0.084	0.09	0.066
29154	0.067	0.104	0.126	0.087
29155	0.083	0.089	0.129	0.102
29156	0.112	0.111	0.146	0.087
29157	0.058	0.082	0.103	0.079
29158	0.076	0.0805	0.14	0.088
29159	0.1	0.125	0.133	0.115
29160	0.089	0.134	0.097	0.172
29161	0.071	0.103	0.116	0.112
29162	0.106	0.127	0.149	0.128
29163	0.0905	0.1	0.1105	0.106
29164	0.0695	0.1105	0.1525	0.163
29165	0.029	0.086	0.065	0.107
29166	0.081	0.103	0.16	0.187
29167	0.102	0.115	0.153	0.156
29168	0.119	0.115	0.113	0.133
29169	0.1075	0.115	0.1165	0.156
29171	0.068	0.092	0.109	0.139
29172	0.125	0.124	0.128	0.145
29173	0.071	0.119	0.182	0.116
29174	0.067	0.08	0.111	0.115
29175	0.079	0.134	0.143	0.153
29176	0.08	0.096	0.111	0.076
29177	0.108	0.115	0.113	0.159
29178	0.044	0.117	0.121	0.138
29179	0.09	0.089	0.118	0.117
29180	0.068	0.122	0.139	0.106
29181	0.112	0.138	0.173	0.114
29182	0.086	0.097	0.109	0.1
29183	0.082	0.099	0.129	0.083
29184	0.128	0.14	0.13	0.098
29185	0.09	0.093	0.106	0.09
29186	0.0585	0.0945	0.103	0.066
29187	0.079	0.113	0.128	0.145
29188	0.057	0.104	0.115	0.093
29189	0.069	0.106	0.129	0.086
29190	0.071	0.082	0.087	0.085

## Sheet: Appendix D
Appendix D: Functional annotation and enrichment of Cd content QTL on Chromosome 5BL
ONTOLOGY	ID	Description	geneID	Count
BP	GO:2001142	nicotinate transport	TraesCS5B02G380500/TraesCS5B02G380600/TraesCS5B02G380600/TraesCS5B02G380600/TraesCS5B02G380600/TraesCS5B02G380600	6
BP	GO:2001143	N-methylnicotinate transport	TraesCS5B02G380500/TraesCS5B02G380600/TraesCS5B02G380600/TraesCS5B02G380600/TraesCS5B02G380600/TraesCS5B02G380600	6
BP	GO:0015697	quaternary ammonium group transport	TraesCS5B02G380500/TraesCS5B02G380600/TraesCS5B02G380600/TraesCS5B02G380600/TraesCS5B02G380600/TraesCS5B02G380600	6
BP	GO:0035461	vitamin transmembrane transport	TraesCS5B02G380500/TraesCS5B02G380600/TraesCS5B02G380600/TraesCS5B02G380600/TraesCS5B02G380600/TraesCS5B02G380600	6
BP	GO:0051180	vitamin transport	TraesCS5B02G380500/TraesCS5B02G380600/TraesCS5B02G380600/TraesCS5B02G380600/TraesCS5B02G380600/TraesCS5B02G380600	6
BP	GO:0072488	ammonium transmembrane transport	TraesCS5B02G380500/TraesCS5B02G380600/TraesCS5B02G380600/TraesCS5B02G380600/TraesCS5B02G380600/TraesCS5B02G380600	6
BP	GO:0015696	ammonium transport	TraesCS5B02G380500/TraesCS5B02G380600/TraesCS5B02G380600/TraesCS5B02G380600/TraesCS5B02G380600/TraesCS5B02G380600	6
BP	GO:0015695	organic cation transport	TraesCS5B02G380500/TraesCS5B02G380600/TraesCS5B02G380600/TraesCS5B02G380600/TraesCS5B02G380600/TraesCS5B02G380600	6
BP	GO:1903825	organic acid transmembrane transport	TraesCS5B02G380500/TraesCS5B02G380600/TraesCS5B02G380600/TraesCS5B02G380600/TraesCS5B02G380600/TraesCS5B02G380600	6
BP	GO:1905039	carboxylic acid transmembrane transport	TraesCS5B02G380500/TraesCS5B02G380600/TraesCS5B02G380600/TraesCS5B02G380600/TraesCS5B02G380600/TraesCS5B02G380600	6
BP	GO:0015718	monocarboxylic acid transport	TraesCS5B02G380500/TraesCS5B02G380600/TraesCS5B02G380600/TraesCS5B02G380600/TraesCS5B02G380600/TraesCS5B02G380600/TraesCS5B02G384200/TraesCS5B02G384200/TraesCS5B02G384200	9
BP	GO:0015849	organic acid transport	TraesCS5B02G380500/TraesCS5B02G380600/TraesCS5B02G380600/TraesCS5B02G380600/TraesCS5B02G380600/TraesCS5B02G380600/TraesCS5B02G384200/TraesCS5B02G384200/TraesCS5B02G384200	9
BP	GO:0046942	carboxylic acid transport	TraesCS5B02G380500/TraesCS5B02G380600/TraesCS5B02G380600/TraesCS5B02G380600/TraesCS5B02G380600/TraesCS5B02G380600/TraesCS5B02G384200/TraesCS5B02G384200/TraesCS5B02G384200	9
BP	GO:0006855	drug transmembrane transport	TraesCS5B02G380500/TraesCS5B02G380600/TraesCS5B02G380600/TraesCS5B02G380600/TraesCS5B02G380600/TraesCS5B02G380600/TraesCS5B02G408500	7
BP	GO:0015893	drug transport	TraesCS5B02G380500/TraesCS5B02G380600/TraesCS5B02G380600/TraesCS5B02G380600/TraesCS5B02G380600/TraesCS5B02G380600/TraesCS5B02G408500	7
BP	GO:0009817	defense response to fungus	TraesCS5B02G381300	1
BP	GO:0018345	protein palmitoylation	TraesCS5B02G381300	1
BP	GO:0010541	acropetal auxin transport	TraesCS5B02G381300	1
BP	GO:0018342	protein prenylation	TraesCS5B02G381300	1
BP	GO:0097354	prenylation	TraesCS5B02G381300	1
BP	GO:0043543	protein acylation	TraesCS5B02G381300/TraesCS5B02G395200/TraesCS5B02G405900	3
BP	GO:0009926	auxin polar transport	TraesCS5B02G381300/TraesCS5B02G395700	2
BP	GO:0060918	auxin transport	TraesCS5B02G381300/TraesCS5B02G395700	2
BP	GO:0009914	hormone transport	TraesCS5B02G381300/TraesCS5B02G395700	2
BP	GO:0006497	protein lipidation	TraesCS5B02G381300/TraesCS5B02G400500	2
BP	GO:0042158	lipoprotein biosynthetic process	TraesCS5B02G381300/TraesCS5B02G400500	2
BP	GO:0042157	lipoprotein metabolic process	TraesCS5B02G381300/TraesCS5B02G400500	2
BP	GO:0045038	protein import into chloroplast thylakoid membrane	TraesCS5B02G381600	1
BP	GO:0043953	protein transport by the Tat complex	TraesCS5B02G381600	1
BP	GO:0006612	protein targeting to membrane	TraesCS5B02G381600	1
BP	GO:0045036	protein targeting to chloroplast	TraesCS5B02G381600	1
BP	GO:0072596	establishment of protein localization to chloroplast	TraesCS5B02G381600	1
BP	GO:0072598	protein localization to chloroplast	TraesCS5B02G381600	1
BP	GO:0090150	establishment of protein localization to membrane	TraesCS5B02G381600	1
BP	GO:0072657	protein localization to membrane	TraesCS5B02G381600	1
BP	GO:0044743	protein transmembrane import into intracellular organelle	TraesCS5B02G381600	1
BP	GO:0065002	intracellular protein transmembrane transport	TraesCS5B02G381600	1
BP	GO:0071806	protein transmembrane transport	TraesCS5B02G381600	1
BP	GO:0045910	negative regulation of DNA recombination	TraesCS5B02G381700	1
BP	GO:0000002	mitochondrial genome maintenance	TraesCS5B02G381700	1
BP	GO:0000018	regulation of DNA recombination	TraesCS5B02G381700	1
BP	GO:0051053	negative regulation of DNA metabolic process	TraesCS5B02G381700	1
BP	GO:1900057	positive regulation of leaf senescence	TraesCS5B02G381900/TraesCS5B02G386800	2
BP	GO:1905623	positive regulation of leaf development	TraesCS5B02G381900/TraesCS5B02G386800	2
BP	GO:1900055	regulation of leaf senescence	TraesCS5B02G381900/TraesCS5B02G386800	2
BP	GO:0010102	lateral root morphogenesis	TraesCS5B02G381900/TraesCS5B02G386800	2
BP	GO:0010101	post-embryonic root morphogenesis	TraesCS5B02G381900/TraesCS5B02G386800	2
BP	GO:2000024	regulation of leaf development	TraesCS5B02G381900/TraesCS5B02G386800	2
BP	GO:0009630	gravitropism	TraesCS5B02G381900/TraesCS5B02G386800	2
BP	GO:0009629	response to gravity	TraesCS5B02G381900/TraesCS5B02G386800	2
BP	GO:0009606	tropism	TraesCS5B02G381900/TraesCS5B02G386800	2
BP	GO:0055047	generative cell mitosis	TraesCS5B02G382000/TraesCS5B02G382000/TraesCS5B02G382000/TraesCS5B02G382000/TraesCS5B02G382000	5
BP	GO:0031146	SCF-dependent proteasomal ubiquitin-dependent protein catabolic process	TraesCS5B02G382000/TraesCS5B02G382000/TraesCS5B02G382000/TraesCS5B02G382000/TraesCS5B02G382000	5
BP	GO:0022412	cellular process involved in reproduction in multicellular organism	TraesCS5B02G382000/TraesCS5B02G382000/TraesCS5B02G382000/TraesCS5B02G382000/TraesCS5B02G382000	5
BP	GO:0048232	male gamete generation	TraesCS5B02G382000/TraesCS5B02G382000/TraesCS5B02G382000/TraesCS5B02G382000/TraesCS5B02G382000/TraesCS5B02G391200	6
BP	GO:0140014	mitotic nuclear division	TraesCS5B02G382000/TraesCS5B02G382000/TraesCS5B02G382000/TraesCS5B02G382000/TraesCS5B02G382000/TraesCS5B02G400900/TraesCS5B02G401600	7
BP	GO:0051865	protein autoubiquitination	TraesCS5B02G382100	1
BP	GO:0031035	myosin filament disassembly	TraesCS5B02G382700	1
BP	GO:0031037	myosin II filament disassembly	TraesCS5B02G382700	1
BP	GO:0031038	myosin II filament organization	TraesCS5B02G382700	1
BP	GO:0018107	peptidyl-threonine phosphorylation	TraesCS5B02G382700	1
BP	GO:0018210	peptidyl-threonine modification	TraesCS5B02G382700	1
BP	GO:0043624	cellular protein complex disassembly	TraesCS5B02G382700	1
BP	GO:0009846	pollen germination	TraesCS5B02G382700	1
BP	GO:0032984	protein-containing complex disassembly	TraesCS5B02G382700	1
BP	GO:0022411	cellular component disassembly	TraesCS5B02G382700	1
BP	GO:0031033	myosin filament organization	TraesCS5B02G382700/TraesCS5B02G391400/TraesCS5B02G391400	3
BP	GO:0030036	actin cytoskeleton organization	TraesCS5B02G382700/TraesCS5B02G391400/TraesCS5B02G391400/TraesCS5B02G397300	4
BP	GO:0030029	actin filament-based process	TraesCS5B02G382700/TraesCS5B02G391400/TraesCS5B02G391400/TraesCS5B02G397300	4
BP	GO:0051754	meiotic sister chromatid cohesion	TraesCS5B02G383200	1
BP	GO:0051177	meiotic sister chromatid cohesion	TraesCS5B02G383200	1
BP	GO:0070601	centromeric sister chromatid cohesion	TraesCS5B02G383200	1
BP	GO:0045144	meiotic sister chromatid segregation	TraesCS5B02G383200	1
BP	GO:0007135	meiosis II	TraesCS5B02G383200	1
BP	GO:0061983	meiosis II cell cycle process	TraesCS5B02G383200	1
BP	GO:0051316	attachment of spindle microtubules to kinetochore involved in meiotic chromosome segregation	TraesCS5B02G383200	1
BP	GO:0051455	monopolar spindle attachment to meiosis I kinetochore	TraesCS5B02G383200	1
BP	GO:0008608	attachment of spindle microtubules to kinetochore	TraesCS5B02G383200	1
BP	GO:0007062	sister chromatid cohesion	TraesCS5B02G383200/TraesCS5B02G391200	2
BP	GO:0000819	sister chromatid segregation	TraesCS5B02G383200/TraesCS5B02G391200/TraesCS5B02G401600	3
BP	GO:0070192	chromosome organization involved in meiotic cell cycle	TraesCS5B02G383200/TraesCS5B02G396300	2
BP	GO:0045143	homologous chromosome segregation	TraesCS5B02G383200/TraesCS5B02G396300	2
BP	GO:0045132	meiotic chromosome segregation	TraesCS5B02G383200/TraesCS5B02G396300	2
BP	GO:0007127	meiosis I	TraesCS5B02G383200/TraesCS5B02G396300	2
BP	GO:0061982	meiosis I cell cycle process	TraesCS5B02G383200/TraesCS5B02G396300	2
BP	GO:0008612	peptidyl-lysine modification to peptidyl-hypusine	TraesCS5B02G383700/TraesCS5B02G383900/TraesCS5B02G383900	3
BP	GO:0051604	protein maturation	TraesCS5B02G383700/TraesCS5B02G383900/TraesCS5B02G383900/TraesCS5B02G406800/TraesCS5B02G406800/TraesCS5B02G406800/TraesCS5B02G406800/TraesCS5B02G406800	8
BP	GO:0035542	regulation of SNARE complex assembly	TraesCS5B02G384200/TraesCS5B02G384200/TraesCS5B02G384200	3
BP	GO:0035493	SNARE complex assembly	TraesCS5B02G384200/TraesCS5B02G384200/TraesCS5B02G384200	3
BP	GO:0045176	apical protein localization	TraesCS5B02G384200/TraesCS5B02G384200/TraesCS5B02G384200	3
BP	GO:0007040	lysosome organization	TraesCS5B02G384200/TraesCS5B02G384200/TraesCS5B02G384200	3
BP	GO:0080171	lytic vacuole organization	TraesCS5B02G384200/TraesCS5B02G384200/TraesCS5B02G384200	3
BP	GO:0006904	vesicle docking involved in exocytosis	TraesCS5B02G384200/TraesCS5B02G384200/TraesCS5B02G384200	3
BP	GO:0008333	endosome to lysosome transport	TraesCS5B02G384200/TraesCS5B02G384200/TraesCS5B02G384200	3
BP	GO:0007032	endosome organization	TraesCS5B02G384200/TraesCS5B02G384200/TraesCS5B02G384200	3
BP	GO:0140029	exocytic process	TraesCS5B02G384200/TraesCS5B02G384200/TraesCS5B02G384200	3
BP	GO:0007041	lysosomal transport	TraesCS5B02G384200/TraesCS5B02G384200/TraesCS5B02G384200	3
BP	GO:0048278	vesicle docking	TraesCS5B02G384200/TraesCS5B02G384200/TraesCS5B02G384200	3
BP	GO:0022406	membrane docking	TraesCS5B02G384200/TraesCS5B02G384200/TraesCS5B02G384200	3
BP	GO:0140056	organelle localization by membrane tethering	TraesCS5B02G384200/TraesCS5B02G384200/TraesCS5B02G384200	3
BP	GO:0015850	organic hydroxy compound transport	TraesCS5B02G384200/TraesCS5B02G384200/TraesCS5B02G384200	3
BP	GO:0043476	pigment accumulation	TraesCS5B02G384200/TraesCS5B02G384200/TraesCS5B02G384200	3
BP	GO:0043473	pigmentation	TraesCS5B02G384200/TraesCS5B02G384200/TraesCS5B02G384200	3
BP	GO:0031338	regulation of vesicle fusion	TraesCS5B02G384200/TraesCS5B02G384200/TraesCS5B02G384200	3
BP	GO:0007610	behavior	TraesCS5B02G384200/TraesCS5B02G384200/TraesCS5B02G384200	3
BP	GO:0006906	vesicle fusion	TraesCS5B02G384200/TraesCS5B02G384200/TraesCS5B02G384200	3
BP	GO:0090174	organelle membrane fusion	TraesCS5B02G384200/TraesCS5B02G384200/TraesCS5B02G384200	3
BP	GO:0061025	membrane fusion	TraesCS5B02G384200/TraesCS5B02G384200/TraesCS5B02G384200	3
BP	GO:0006887	exocytosis	TraesCS5B02G384200/TraesCS5B02G384200/TraesCS5B02G384200	3
BP	GO:0048284	organelle fusion	TraesCS5B02G384200/TraesCS5B02G384200/TraesCS5B02G384200	3
BP	GO:0010256	endomembrane system organization	TraesCS5B02G384200/TraesCS5B02G384200/TraesCS5B02G384200	3
BP	GO:0006869	lipid transport	TraesCS5B02G384200/TraesCS5B02G384200/TraesCS5B02G384200	3
BP	GO:0060627	regulation of vesicle-mediated transport	TraesCS5B02G384200/TraesCS5B02G384200/TraesCS5B02G384200	3
BP	GO:0010876	lipid localization	TraesCS5B02G384200/TraesCS5B02G384200/TraesCS5B02G384200	3
BP	GO:0048568	embryonic organ development	TraesCS5B02G384200/TraesCS5B02G384200/TraesCS5B02G384200/TraesCS5B02G386700/TraesCS5B02G386700	5
BP	GO:0016050	vesicle organization	TraesCS5B02G384200/TraesCS5B02G384200/TraesCS5B02G384200/TraesCS5B02G386700/TraesCS5B02G386700/TraesCS5B02G391400/TraesCS5B02G391400	7
BP	GO:0007034	vacuolar transport	TraesCS5B02G384200/TraesCS5B02G384200/TraesCS5B02G384200/TraesCS5B02G387800/TraesCS5B02G387800/TraesCS5B02G387800	6
BP	GO:0007033	vacuole organization	TraesCS5B02G384200/TraesCS5B02G384200/TraesCS5B02G384200/TraesCS5B02G387800/TraesCS5B02G387800/TraesCS5B02G387800/TraesCS5B02G391400/TraesCS5B02G391400	8
BP	GO:0043254	regulation of protein-containing complex assembly	TraesCS5B02G384200/TraesCS5B02G384200/TraesCS5B02G384200/TraesCS5B02G391400/TraesCS5B02G391400	5
BP	GO:0032940	secretion by cell	TraesCS5B02G384200/TraesCS5B02G384200/TraesCS5B02G384200/TraesCS5B02G392800	4
BP	GO:0006303	double-strand break repair via nonhomologous end joining	TraesCS5B02G384400	1
BP	GO:0000726	non-recombinational repair	TraesCS5B02G384400	1
BP	GO:0016143	S-glycoside metabolic process	TraesCS5B02G384600	1
BP	GO:0019757	glycosinolate metabolic process	TraesCS5B02G384600	1
BP	GO:0019760	glucosinolate metabolic process	TraesCS5B02G384600	1
BP	GO:0050891	multicellular organismal water homeostasis	TraesCS5B02G386000	1
BP	GO:0050878	regulation of body fluid levels	TraesCS5B02G386000	1
BP	GO:0016123	xanthophyll biosynthetic process	TraesCS5B02G386000	1
BP	GO:0030104	water homeostasis	TraesCS5B02G386000	1
BP	GO:0016122	xanthophyll metabolic process	TraesCS5B02G386000	1
BP	GO:0048871	multicellular organismal homeostasis	TraesCS5B02G386000	1
BP	GO:0016109	tetraterpenoid biosynthetic process	TraesCS5B02G386000	1
BP	GO:0016117	carotenoid biosynthetic process	TraesCS5B02G386000	1
BP	GO:0009688	abscisic acid biosynthetic process	TraesCS5B02G386000	1
BP	GO:0043289	apocarotenoid biosynthetic process	TraesCS5B02G386000	1
BP	GO:1902645	tertiary alcohol biosynthetic process	TraesCS5B02G386000	1
BP	GO:0009687	abscisic acid metabolic process	TraesCS5B02G386000	1
BP	GO:0043288	apocarotenoid metabolic process	TraesCS5B02G386000	1
BP	GO:1902644	tertiary alcohol metabolic process	TraesCS5B02G386000	1
BP	GO:0016108	tetraterpenoid metabolic process	TraesCS5B02G386000	1
BP	GO:0016116	carotenoid metabolic process	TraesCS5B02G386000	1
BP	GO:0016106	sesquiterpenoid biosynthetic process	TraesCS5B02G386000	1
BP	GO:0006714	sesquiterpenoid metabolic process	TraesCS5B02G386000	1
BP	GO:0010114	response to red light	TraesCS5B02G386000	1
BP	GO:0046165	alcohol biosynthetic process	TraesCS5B02G386000	1
BP	GO:0006066	alcohol metabolic process	TraesCS5B02G386000	1
BP	GO:0009756	carbohydrate mediated signaling	TraesCS5B02G386000/TraesCS5B02G401200/TraesCS5B02G403300	3
BP	GO:0010182	sugar mediated signaling pathway	TraesCS5B02G386000/TraesCS5B02G401200/TraesCS5B02G403300	3
BP	GO:0071322	cellular response to carbohydrate stimulus	TraesCS5B02G386000/TraesCS5B02G401200/TraesCS5B02G403300	3
BP	GO:1903830	magnesium ion transmembrane transport	TraesCS5B02G386300	1
BP	GO:0015693	magnesium ion transport	TraesCS5B02G386300	1
BP	GO:0070838	divalent metal ion transport	TraesCS5B02G386300/TraesCS5B02G388000/TraesCS5B02G400100/TraesCS5B02G402100	5
BP	GO:0072511	divalent inorganic cation transport	TraesCS5B02G386300/TraesCS5B02G388000/TraesCS5B02G400100/TraesCS5B02G400100/TraesCS5B02G402100	5
BP	GO:0090110	COPII-coated vesicle cargo loading	TraesCS5B02G386700/TraesCS5B02G386700	2
BP	GO:0048702	embryonic neurocranium morphogenesis	TraesCS5B02G386700/TraesCS5B02G386700	2
BP	GO:0048701	embryonic cranial skeleton morphogenesis	TraesCS5B02G386700/TraesCS5B02G386700	2
BP	GO:0048704	embryonic skeletal system morphogenesis	TraesCS5B02G386700/TraesCS5B02G386700	2
BP	GO:0048705	skeletal system morphogenesis	TraesCS5B02G386700/TraesCS5B02G386700	2
BP	GO:0048706	embryonic skeletal system development	TraesCS5B02G386700/TraesCS5B02G386700	2
BP	GO:1904888	cranial skeletal system development	TraesCS5B02G386700/TraesCS5B02G386700	2
BP	GO:0033333	fin development	TraesCS5B02G386700/TraesCS5B02G386700	2
BP	GO:0033334	fin morphogenesis	TraesCS5B02G386700/TraesCS5B02G386700	2
BP	GO:0033339	pectoral fin development	TraesCS5B02G386700/TraesCS5B02G386700	2
BP	GO:0035138	pectoral fin morphogenesis	TraesCS5B02G386700/TraesCS5B02G386700	2
BP	GO:0060173	limb development	TraesCS5B02G386700/TraesCS5B02G386700	2
BP	GO:0035459	vesicle cargo loading	TraesCS5B02G386700/TraesCS5B02G386700	2
BP	GO:0051668	localization within membrane	TraesCS5B02G386700/TraesCS5B02G386700	2
BP	GO:0090114	COPII-coated vesicle budding	TraesCS5B02G386700/TraesCS5B02G386700	2
BP	GO:0001501	skeletal system development	TraesCS5B02G386700/TraesCS5B02G386700	2
BP	GO:0048194	Golgi vesicle budding	TraesCS5B02G386700/TraesCS5B02G386700	2
BP	GO:0035107	appendage morphogenesis	TraesCS5B02G386700/TraesCS5B02G386700	2
BP	GO:0048736	appendage development	TraesCS5B02G386700/TraesCS5B02G386700	2
BP	GO:0048562	embryonic organ morphogenesis	TraesCS5B02G386700/TraesCS5B02G386700	2
BP	GO:0006900	vesicle budding from membrane	TraesCS5B02G386700/TraesCS5B02G386700	2
BP	GO:0043009	chordate embryonic development	TraesCS5B02G386700/TraesCS5B02G386700	2
BP	GO:0009887	animal organ morphogenesis	TraesCS5B02G386700/TraesCS5B02G386700	2
BP	GO:0009792	embryo development ending in birth or egg hatching	TraesCS5B02G386700/TraesCS5B02G386700	2
BP	GO:0048598	embryonic morphogenesis	TraesCS5B02G386700/TraesCS5B02G386700	2
BP	GO:0048193	Golgi vesicle transport	TraesCS5B02G386700/TraesCS5B02G386700/TraesCS5B02G395000/TraesCS5B02G400500	4
BP	GO:0006888	endoplasmic reticulum to Golgi vesicle-mediated transport	TraesCS5B02G386700/TraesCS5B02G386700/TraesCS5B02G400500	3
BP	GO:0033962	cytoplasmic mRNA processing body assembly	TraesCS5B02G387800/TraesCS5B02G387800/TraesCS5B02G387800	3
BP	GO:0008298	intracellular mRNA localization	TraesCS5B02G387800/TraesCS5B02G387800/TraesCS5B02G387800	3
BP	GO:0080001	mucilage extrusion from seed coat	TraesCS5B02G387800/TraesCS5B02G387800/TraesCS5B02G387800	3
BP	GO:0071472	cellular response to salt stress	TraesCS5B02G387800/TraesCS5B02G387800/TraesCS5B02G387800	3
BP	GO:0071470	cellular response to osmotic stress	TraesCS5B02G387800/TraesCS5B02G387800/TraesCS5B02G387800	3
BP	GO:0010090	trichome morphogenesis	TraesCS5B02G387800/TraesCS5B02G387800/TraesCS5B02G387800	3
BP	GO:0006403	RNA localization	TraesCS5B02G387800/TraesCS5B02G387800/TraesCS5B02G387800	3
BP	GO:0010026	trichome differentiation	TraesCS5B02G387800/TraesCS5B02G387800/TraesCS5B02G387800	3
BP	GO:0060341	regulation of cellular localization	TraesCS5B02G387800/TraesCS5B02G387800/TraesCS5B02G387800/TraesCS5B02G391200/TraesCS5B02G392200	5
BP	GO:0022618	ribonucleoprotein complex assembly	TraesCS5B02G387800/TraesCS5B02G387800/TraesCS5B02G387800/TraesCS5B02G392200	4
BP	GO:0009825	multidimensional cell growth	TraesCS5B02G387800/TraesCS5B02G387800/TraesCS5B02G387800/TraesCS5B02G395700/TraesCS5B02G396900/TraesCS5B02G397000/TraesCS5B02G397000	7
BP	GO:0090626	plant epidermis morphogenesis	TraesCS5B02G387800/TraesCS5B02G387800/TraesCS5B02G387800/TraesCS5B02G406500	4
BP	GO:0032025	response to cobalt ion	TraesCS5B02G388000	1
BP	GO:0071585	detoxification of cadmium ion	TraesCS5B02G388000	1
BP	GO:1990170	stress response to cadmium ion	TraesCS5B02G388000	1
BP	GO:0061687	detoxification of inorganic compound	TraesCS5B02G388000	1
BP	GO:0015691	cadmium ion transport	TraesCS5B02G388000	1
BP	GO:0097501	stress response to metal ion	TraesCS5B02G388000	1
BP	GO:0055069	zinc ion homeostasis	TraesCS5B02G388000	1
BP	GO:0006829	zinc ion transport	TraesCS5B02G388000	1
BP	GO:0072507	divalent inorganic cation homeostasis	TraesCS5B02G388000	1
BP	GO:0010043	response to zinc ion	TraesCS5B02G388000	1
BP	GO:0000041	transition metal ion transport	TraesCS5B02G388000/TraesCS5B02G395800	2
BP	GO:0055076	transition metal ion homeostasis	TraesCS5B02G388000/TraesCS5B02G395800	2
BP	GO:0000958	mitochondrial mRNA catabolic process	TraesCS5B02G389300	1
BP	GO:0000960	regulation of mitochondrial RNA catabolic process	TraesCS5B02G389300	1
BP	GO:0000962	positive regulation of mitochondrial RNA catabolic process	TraesCS5B02G389300	1
BP	GO:0070827	chromatin maintenance	TraesCS5B02G389300	1
BP	GO:0000957	mitochondrial RNA catabolic process	TraesCS5B02G389300	1
BP	GO:0043954	cellular component maintenance	TraesCS5B02G389300	1
BP	GO:0009939	positive regulation of gibberellic acid mediated signaling pathway	TraesCS5B02G389300	1
BP	GO:0010929	positive regulation of auxin mediated signaling pathway	TraesCS5B02G389300	1
BP	GO:0009937	regulation of gibberellic acid mediated signaling pathway	TraesCS5B02G389300	1
BP	GO:0080038	positive regulation of cytokinin-activated signaling pathway	TraesCS5B02G389300	1
BP	GO:0071025	RNA surveillance	TraesCS5B02G389300	1
BP	GO:1902584	positive regulation of response to water deprivation	TraesCS5B02G389300	1
BP	GO:0032990	cell part morphogenesis	TraesCS5B02G389300	1
BP	GO:1901002	positive regulation of response to salt stress	TraesCS5B02G389300	1
BP	GO:0080036	regulation of cytokinin-activated signaling pathway	TraesCS5B02G389300	1
BP	GO:0030307	positive regulation of cell growth	TraesCS5B02G389300	1
BP	GO:0000963	mitochondrial RNA processing	TraesCS5B02G389300	1
BP	GO:2000070	regulation of response to water deprivation	TraesCS5B02G389300	1
BP	GO:1901000	regulation of response to salt stress	TraesCS5B02G389300	1
BP	GO:0010928	regulation of auxin mediated signaling pathway	TraesCS5B02G389300	1
BP	GO:0045927	positive regulation of growth	TraesCS5B02G389300	1
BP	GO:0009740	gibberellic acid mediated signaling pathway	TraesCS5B02G389300	1
BP	GO:0010476	gibberellin mediated signaling pathway	TraesCS5B02G389300	1
BP	GO:0043066	negative regulation of apoptotic process	TraesCS5B02G389300	1
BP	GO:0047484	regulation of response to osmotic stress	TraesCS5B02G389300	1
BP	GO:0032508	DNA duplex unwinding	TraesCS5B02G389300	1
BP	GO:0032392	DNA geometric change	TraesCS5B02G389300	1
BP	GO:0140053	mitochondrial gene expression	TraesCS5B02G389300	1
BP	GO:0071370	cellular response to gibberellin stimulus	TraesCS5B02G389300	1
BP	GO:0043069	negative regulation of programmed cell death	TraesCS5B02G389300	1
BP	GO:0042981	regulation of apoptotic process	TraesCS5B02G389300	1
BP	GO:0031331	positive regulation of cellular catabolic process	TraesCS5B02G389300	1
BP	GO:0009896	positive regulation of catabolic process	TraesCS5B02G389300	1
BP	GO:0060548	negative regulation of cell death	TraesCS5B02G389300	1
BP	GO:0001558	regulation of cell growth	TraesCS5B02G389300	1
BP	GO:0006915	apoptotic process	TraesCS5B02G389300	1
BP	GO:0006402	mRNA catabolic process	TraesCS5B02G389300	1
BP	GO:0000959	mitochondrial RNA metabolic process	TraesCS5B02G389300/TraesCS5B02G393500	2
BP	GO:0031123	RNA 3'-end processing	TraesCS5B02G389300/TraesCS5B02G397200	2
BP	GO:0009561	megagametogenesis	TraesCS5B02G389300/TraesCS5B02G400900	2
BP	GO:0009736	cytokinin-activated signaling pathway	TraesCS5B02G389300/TraesCS5B02G406300/TraesCS5B02G406300	3
BP	GO:0071368	cellular response to cytokinin stimulus	TraesCS5B02G389300/TraesCS5B02G406300/TraesCS5B02G406300	3
BP	GO:0006400	tRNA modification	TraesCS5B02G389600	1
BP	GO:0008033	tRNA processing	TraesCS5B02G389600	1
BP	GO:0071922	regulation of cohesin loading	TraesCS5B02G391200	1
BP	GO:0071923	negative regulation of cohesin loading	TraesCS5B02G391200	1
BP	GO:0120186	negative regulation of protein localization to chromatin	TraesCS5B02G391200	1
BP	GO:0045875	negative regulation of sister chromatid cohesion	TraesCS5B02G391200	1
BP	GO:1905634	regulation of protein localization to chromatin	TraesCS5B02G391200	1
BP	GO:0071921	cohesin loading	TraesCS5B02G391200	1
BP	GO:0042766	nucleosome mobilization	TraesCS5B02G391200	1
BP	GO:0007063	regulation of sister chromatid cohesion	TraesCS5B02G391200	1
BP	GO:0051312	chromosome decondensation	TraesCS5B02G391200	1
BP	GO:0034085	establishment of sister chromatid cohesion	TraesCS5B02G391200	1
BP	GO:0071168	protein localization to chromatin	TraesCS5B02G391200	1
BP	GO:0043388	positive regulation of DNA binding	TraesCS5B02G391200	1
BP	GO:0030261	chromosome condensation	TraesCS5B02G391200	1
BP	GO:0051099	positive regulation of binding	TraesCS5B02G391200	1
BP	GO:0051101	regulation of DNA binding	TraesCS5B02G391200	1
BP	GO:0043044	ATP-dependent chromatin remodeling	TraesCS5B02G391200	1
BP	GO:0034502	protein localization to chromosome	TraesCS5B02G391200	1
BP	GO:1903828	negative regulation of cellular protein localization	TraesCS5B02G391200	1
BP	GO:0051098	regulation of binding	TraesCS5B02G391200	1
BP	GO:0000122	negative regulation of transcription by RNA polymerase II	TraesCS5B02G391200	1
BP	GO:0007283	spermatogenesis	TraesCS5B02G391200	1
BP	GO:0034728	nucleosome organization	TraesCS5B02G391200	1
BP	GO:0006323	DNA packaging	TraesCS5B02G391200	1
BP	GO:0071824	protein-DNA complex subunit organization	TraesCS5B02G391200	1
BP	GO:0010639	negative regulation of organelle organization	TraesCS5B02G391200/TraesCS5B02G391400/TraesCS5B02G391400/TraesCS5B02G401600	4
BP	GO:1903827	regulation of cellular protein localization	TraesCS5B02G391200/TraesCS5B02G392200	2
BP	GO:0032880	regulation of protein localization	TraesCS5B02G391200/TraesCS5B02G392200/TraesCS5B02G392800	3
BP	GO:0006338	chromatin remodeling	TraesCS5B02G391200/TraesCS5B02G395200	2
BP	GO:0033046	negative regulation of sister chromatid segregation	TraesCS5B02G391200/TraesCS5B02G401600	2
BP	GO:0051985	negative regulation of chromosome segregation	TraesCS5B02G391200/TraesCS5B02G401600	2
BP	GO:0033045	regulation of sister chromatid segregation	TraesCS5B02G391200/TraesCS5B02G401600	2
BP	GO:0051983	regulation of chromosome segregation	TraesCS5B02G391200/TraesCS5B02G401600	2
BP	GO:2001251	negative regulation of chromosome organization	TraesCS5B02G391200/TraesCS5B02G401600	2
BP	GO:0010948	negative regulation of cell cycle process	TraesCS5B02G391200/TraesCS5B02G401600	2
BP	GO:0010207	photosystem II assembly	TraesCS5B02G391300	1
BP	GO:0019684	photosynthesis	TraesCS5B02G391300/TraesCS5B02G391800	2
BP	GO:0031270	pseudopodium retraction	TraesCS5B02G391400/TraesCS5B02G391400	2
BP	GO:0032060	bleb assembly	TraesCS5B02G391400/TraesCS5B02G391400	2
BP	GO:0033298	contractile vacuole organization	TraesCS5B02G391400/TraesCS5B02G391400	2
BP	GO:0060327	cytoplasmic actin-based contraction involved in cell motility	TraesCS5B02G391400/TraesCS5B02G391400	2
BP	GO:0060328	cytoplasmic actin-based contraction involved in forward cell motility	TraesCS5B02G391400/TraesCS5B02G391400	2
BP	GO:0032796	uropod organization	TraesCS5B02G391400/TraesCS5B02G391400	2
BP	GO:0034461	uropod retraction	TraesCS5B02G391400/TraesCS5B02G391400	2
BP	GO:0030038	contractile actin filament bundle assembly	TraesCS5B02G391400/TraesCS5B02G391400	2
BP	GO:0031034	myosin filament assembly	TraesCS5B02G391400/TraesCS5B02G391400	2
BP	GO:0031268	pseudopodium organization	TraesCS5B02G391400/TraesCS5B02G391400	2
BP	GO:0033275	actin-myosin filament sliding	TraesCS5B02G391400/TraesCS5B02G391400	2
BP	GO:0070252	actin-mediated cell contraction	TraesCS5B02G391400/TraesCS5B02G391400	2
BP	GO:0051591	response to cAMP	TraesCS5B02G391400/TraesCS5B02G391400	2
BP	GO:0046847	filopodium assembly	TraesCS5B02G391400/TraesCS5B02G391400	2
BP	GO:0046683	response to organophosphorus	TraesCS5B02G391400/TraesCS5B02G391400	2
BP	GO:0050982	detection of mechanical stimulus	TraesCS5B02G391400/TraesCS5B02G391400	2
BP	GO:0014074	response to purine-containing compound	TraesCS5B02G391400/TraesCS5B02G391400	2
BP	GO:0031154	culmination involved in sorocarp development	TraesCS5B02G391400/TraesCS5B02G391400	2
BP	GO:0006971	hypotonic response	TraesCS5B02G391400/TraesCS5B02G391400	2
BP	GO:0030048	actin filament-based movement	TraesCS5B02G391400/TraesCS5B02G391400	2
BP	GO:0030866	cortical actin cytoskeleton organization	TraesCS5B02G391400/TraesCS5B02G391400	2
BP	GO:0031152	aggregation involved in sorocarp development	TraesCS5B02G391400/TraesCS5B02G391400	2
BP	GO:0098630	aggregation of unicellular organisms	TraesCS5B02G391400/TraesCS5B02G391400	2
BP	GO:0098743	cell aggregation	TraesCS5B02G391400/TraesCS5B02G391400	2
BP	GO:0051017	actin filament bundle assembly	TraesCS5B02G391400/TraesCS5B02G391400	2
BP	GO:0061572	actin filament bundle organization	TraesCS5B02G391400/TraesCS5B02G391400	2
BP	GO:0009612	response to mechanical stimulus	TraesCS5B02G391400/TraesCS5B02G391400	2
BP	GO:0009581	detection of external stimulus	TraesCS5B02G391400/TraesCS5B02G391400	2
BP	GO:0009582	detection of abiotic stimulus	TraesCS5B02G391400/TraesCS5B02G391400	2
BP	GO:0030837	negative regulation of actin filament polymerization	TraesCS5B02G391400/TraesCS5B02G391400	2
BP	GO:0032272	negative regulation of protein polymerization	TraesCS5B02G391400/TraesCS5B02G391400	2
BP	GO:0031333	negative regulation of protein-containing complex assembly	TraesCS5B02G391400/TraesCS5B02G391400	2
BP	GO:0008360	regulation of cell shape	TraesCS5B02G391400/TraesCS5B02G391400	2
BP	GO:0120031	plasma membrane bounded cell projection assembly	TraesCS5B02G391400/TraesCS5B02G391400	2
BP	GO:0030031	cell projection assembly	TraesCS5B02G391400/TraesCS5B02G391400	2
BP	GO:0030587	sorocarp development	TraesCS5B02G391400/TraesCS5B02G391400	2
BP	GO:0090702	non-reproductive fruiting body development	TraesCS5B02G391400/TraesCS5B02G391400	2
BP	GO:0099120	socially cooperative development	TraesCS5B02G391400/TraesCS5B02G391400	2
BP	GO:1902904	negative regulation of supramolecular fiber organization	TraesCS5B02G391400/TraesCS5B02G391400	2
BP	GO:0051494	negative regulation of cytoskeleton organization	TraesCS5B02G391400/TraesCS5B02G391400	2
BP	GO:0030865	cortical cytoskeleton organization	TraesCS5B02G391400/TraesCS5B02G391400	2
BP	GO:0030833	regulation of actin filament polymerization	TraesCS5B02G391400/TraesCS5B02G391400	2
BP	GO:0051703	intraspecies interaction between organisms	TraesCS5B02G391400/TraesCS5B02G391400	2
BP	GO:0030041	actin filament polymerization	TraesCS5B02G391400/TraesCS5B02G391400	2
BP	GO:0044764	multi-organism cellular process	TraesCS5B02G391400/TraesCS5B02G391400	2
BP	GO:0008064	regulation of actin polymerization or depolymerization	TraesCS5B02G391400/TraesCS5B02G391400	2
BP	GO:0030832	regulation of actin filament length	TraesCS5B02G391400/TraesCS5B02G391400	2
BP	GO:0032271	regulation of protein polymerization	TraesCS5B02G391400/TraesCS5B02G391400	2
BP	GO:0110053	regulation of actin filament organization	TraesCS5B02G391400/TraesCS5B02G391400	2
BP	GO:0008154	actin polymerization or depolymerization	TraesCS5B02G391400/TraesCS5B02G391400	2
BP	GO:0032956	regulation of actin cytoskeleton organization	TraesCS5B02G391400/TraesCS5B02G391400	2
BP	GO:0032970	regulation of actin filament-based process	TraesCS5B02G391400/TraesCS5B02G391400	2
BP	GO:0120036	plasma membrane bounded cell projection organization	TraesCS5B02G391400/TraesCS5B02G391400	2
BP	GO:1902903	regulation of supramolecular fiber organization	TraesCS5B02G391400/TraesCS5B02G391400	2
BP	GO:0030030	cell projection organization	TraesCS5B02G391400/TraesCS5B02G391400	2
BP	GO:0051606	detection of stimulus	TraesCS5B02G391400/TraesCS5B02G391400	2
BP	GO:0022604	regulation of cell morphogenesis	TraesCS5B02G391400/TraesCS5B02G391400	2
BP	GO:0007015	actin filament organization	TraesCS5B02G391400/TraesCS5B02G391400	2
BP	GO:0042542	response to hydrogen peroxide	TraesCS5B02G391400/TraesCS5B02G391400	2
BP	GO:0051258	protein polymerization	TraesCS5B02G391400/TraesCS5B02G391400	2
BP	GO:0051493	regulation of cytoskeleton organization	TraesCS5B02G391400/TraesCS5B02G391400	2
BP	GO:0032535	regulation of cellular component size	TraesCS5B02G391400/TraesCS5B02G391400	2
BP	GO:0090066	regulation of anatomical structure size	TraesCS5B02G391400/TraesCS5B02G391400	2
BP	GO:0048870	cell motility	TraesCS5B02G391400/TraesCS5B02G391400/TraesCS5B02G397300	3
BP	GO:0051674	localization of cell	TraesCS5B02G391400/TraesCS5B02G391400/TraesCS5B02G397300	3
BP	GO:0040011	locomotion	TraesCS5B02G391400/TraesCS5B02G391400/TraesCS5B02G397300/TraesCS5B02G407200	4
BP	GO:0006935	chemotaxis	TraesCS5B02G391400/TraesCS5B02G391400/TraesCS5B02G407200	3
BP	GO:0042330	taxis	TraesCS5B02G391400/TraesCS5B02G391400/TraesCS5B02G407200	3
BP	GO:0009773	photosynthetic electron transport in photosystem I	TraesCS5B02G391800	1
BP	GO:0009767	photosynthetic electron transport chain	TraesCS5B02G391800	1
BP	GO:0022900	electron transport chain	TraesCS5B02G391800	1
BP	GO:0048026	positive regulation of mRNA splicing	TraesCS5B02G392200	1
BP	GO:0048024	regulation of mRNA splicing	TraesCS5B02G392200	1
BP	GO:0072595	maintenance of protein localization in organelle	TraesCS5B02G392200	1
BP	GO:0033120	positive regulation of RNA splicing	TraesCS5B02G392200	1
BP	GO:0050685	positive regulation of mRNA processing	TraesCS5B02G392200	1
BP	GO:0032507	maintenance of protein location in cell	TraesCS5B02G392200	1
BP	GO:0045185	maintenance of protein location	TraesCS5B02G392200	1
BP	GO:0046825	regulation of protein export from nucleus	TraesCS5B02G392200	1
BP	GO:0046822	regulation of nucleocytoplasmic transport	TraesCS5B02G392200	1
BP	GO:0000245	spliceosomal complex assembly	TraesCS5B02G392200	1
BP	GO:0090316	positive regulation of intracellular protein transport	TraesCS5B02G392200	1
BP	GO:0032388	positive regulation of intracellular transport	TraesCS5B02G392200	1
BP	GO:1903829	positive regulation of cellular protein localization	TraesCS5B02G392200	1
BP	GO:1903313	positive regulation of mRNA metabolic process	TraesCS5B02G392200	1
BP	GO:0051651	maintenance of location in cell	TraesCS5B02G392200	1
BP	GO:0050684	regulation of mRNA processing	TraesCS5B02G392200	1
BP	GO:0051235	maintenance of location	TraesCS5B02G392200	1
BP	GO:0033157	regulation of intracellular protein transport	TraesCS5B02G392200	1
BP	GO:0043484	regulation of RNA splicing	TraesCS5B02G392200	1
BP	GO:0032386	regulation of intracellular transport	TraesCS5B02G392200	1
BP	GO:1903311	regulation of mRNA metabolic process	TraesCS5B02G392200	1
BP	GO:0006611	protein export from nucleus	TraesCS5B02G392200	1
BP	GO:0051168	nuclear export	TraesCS5B02G392200	1
BP	GO:0051222	positive regulation of protein transport	TraesCS5B02G392200/TraesCS5B02G392800	2
BP	GO:1904951	positive regulation of establishment of protein localization	TraesCS5B02G392200/TraesCS5B02G392800	2
BP	GO:0051050	positive regulation of transport	TraesCS5B02G392200/TraesCS5B02G392800	2
BP	GO:0051223	regulation of protein transport	TraesCS5B02G392200/TraesCS5B02G392800	2
BP	GO:0070201	regulation of establishment of protein localization	TraesCS5B02G392200/TraesCS5B02G392800	2
BP	GO:0090087	regulation of peptide transport	TraesCS5B02G392200/TraesCS5B02G392800	2
BP	GO:0034504	protein localization to nucleus	TraesCS5B02G392200/TraesCS5B02G406900	2
BP	GO:0070482	response to oxygen levels	TraesCS5B02G392600/TraesCS5B02G401200/TraesCS5B02G401200/TraesCS5B02G403300/TraesCS5B02G403300	5
BP	GO:0043330	response to exogenous dsRNA	TraesCS5B02G392800	1
BP	GO:0032607	interferon-alpha production	TraesCS5B02G392800	1
BP	GO:0032647	regulation of interferon-alpha production	TraesCS5B02G392800	1
BP	GO:0032727	positive regulation of interferon-alpha production	TraesCS5B02G392800	1
BP	GO:0050663	cytokine secretion	TraesCS5B02G392800	1
BP	GO:0050707	regulation of cytokine secretion	TraesCS5B02G392800	1
BP	GO:0050715	positive regulation of cytokine secretion	TraesCS5B02G392800	1
BP	GO:0001503	ossification	TraesCS5B02G392800	1
BP	GO:0090669	telomerase RNA stabilization	TraesCS5B02G392800	1
BP	GO:0032206	positive regulation of telomere maintenance	TraesCS5B02G392800	1
BP	GO:0050714	positive regulation of protein secretion	TraesCS5B02G392800	1
BP	GO:0002793	positive regulation of peptide secretion	TraesCS5B02G392800	1
BP	GO:0032481	positive regulation of type I interferon production	TraesCS5B02G392800	1
BP	GO:0032479	regulation of type I interferon production	TraesCS5B02G392800	1
BP	GO:0032606	type I interferon production	TraesCS5B02G392800	1
BP	GO:0051047	positive regulation of secretion	TraesCS5B02G392800	1
BP	GO:1903532	positive regulation of secretion by cell	TraesCS5B02G392800	1
BP	GO:0001819	positive regulation of cytokine production	TraesCS5B02G392800	1
BP	GO:0043489	RNA stabilization	TraesCS5B02G392800	1
BP	GO:1902369	negative regulation of RNA catabolic process	TraesCS5B02G392800	1
BP	GO:0001817	regulation of cytokine production	TraesCS5B02G392800	1
BP	GO:0001816	cytokine production	TraesCS5B02G392800	1
BP	GO:0023061	signal release	TraesCS5B02G392800	1
BP	GO:0032204	regulation of telomere maintenance	TraesCS5B02G392800	1
BP	GO:0050708	regulation of protein secretion	TraesCS5B02G392800	1
BP	GO:0002791	regulation of peptide secretion	TraesCS5B02G392800	1
BP	GO:0051046	regulation of secretion	TraesCS5B02G392800	1
BP	GO:1903530	regulation of secretion by cell	TraesCS5B02G392800	1
BP	GO:0009306	protein secretion	TraesCS5B02G392800	1
BP	GO:0035592	establishment of protein localization to extracellular region	TraesCS5B02G392800	1
BP	GO:0071692	protein localization to extracellular region	TraesCS5B02G392800	1
BP	GO:0002790	peptide secretion	TraesCS5B02G392800	1
BP	GO:0043487	regulation of RNA stability	TraesCS5B02G392800	1
BP	GO:0051054	positive regulation of DNA metabolic process	TraesCS5B02G392800	1
BP	GO:0031330	negative regulation of cellular catabolic process	TraesCS5B02G392800	1
BP	GO:0000723	telomere maintenance	TraesCS5B02G392800	1
BP	GO:0009895	negative regulation of catabolic process	TraesCS5B02G392800	1
BP	GO:0032200	telomere organization	TraesCS5B02G392800	1
BP	GO:0060249	anatomical structure homeostasis	TraesCS5B02G392800	1
BP	GO:0010501	RNA secondary structure unwinding	TraesCS5B02G392800	1
BP	GO:0043331	response to dsRNA	TraesCS5B02G392800	1
BP	GO:0007267	cell-cell signaling	TraesCS5B02G392800	1
BP	GO:0009615	response to virus	TraesCS5B02G392800	1
BP	GO:2001252	positive regulation of chromosome organization	TraesCS5B02G392800/TraesCS5B02G395200	2
BP	GO:0010638	positive regulation of organelle organization	TraesCS5B02G392800/TraesCS5B02G395200	2
BP	GO:0009251	glucan catabolic process	TraesCS5B02G393300/TraesCS5B02G393300/TraesCS5B02G393700/TraesCS5B02G393800/TraesCS5B02G393900/TraesCS5B02G394000/TraesCS5B02G400000/TraesCS5B02G400000	8
BP	GO:0000272	polysaccharide catabolic process	TraesCS5B02G393300/TraesCS5B02G393300/TraesCS5B02G393700/TraesCS5B02G393800/TraesCS5B02G393900/TraesCS5B02G394000/TraesCS5B02G400000/TraesCS5B02G400000	8
BP	GO:0080156	mitochondrial mRNA modification	TraesCS5B02G393500	1
BP	GO:1900864	mitochondrial RNA modification	TraesCS5B02G393500	1
BP	GO:0016556	mRNA modification	TraesCS5B02G393500	1
BP	GO:1900368	regulation of RNA interference	TraesCS5B02G394400/TraesCS5B02G394400/TraesCS5B02G394400	3
BP	GO:0060966	regulation of gene silencing by RNA	TraesCS5B02G394400/TraesCS5B02G394400/TraesCS5B02G394400	3
BP	GO:0060147	regulation of posttranscriptional gene silencing	TraesCS5B02G394400/TraesCS5B02G394400/TraesCS5B02G394400	3
BP	GO:0060968	regulation of gene silencing	TraesCS5B02G394400/TraesCS5B02G394400/TraesCS5B02G394400	3
BP	GO:0016246	RNA interference	TraesCS5B02G394400/TraesCS5B02G394400/TraesCS5B02G394400	3
BP	GO:0035194	post-transcriptional gene silencing by RNA	TraesCS5B02G394400/TraesCS5B02G394400/TraesCS5B02G394400	3
BP	GO:0016441	posttranscriptional gene silencing	TraesCS5B02G394400/TraesCS5B02G394400/TraesCS5B02G394400	3
BP	GO:0031047	gene silencing by RNA	TraesCS5B02G394400/TraesCS5B02G394400/TraesCS5B02G394400	3
BP	GO:0006890	retrograde vesicle-mediated transport	TraesCS5B02G395000	1
BP	GO:0019886	antigen processing and presentation of exogenous peptide antigen via MHC class II	TraesCS5B02G395000	1
BP	GO:0002478	antigen processing and presentation of exogenous peptide antigen	TraesCS5B02G395000	1
BP	GO:0019884	antigen processing and presentation of exogenous antigen	TraesCS5B02G395000	1
BP	GO:0002495	antigen processing and presentation of peptide antigen via MHC class II	TraesCS5B02G395000	1
BP	GO:0002504	antigen processing and presentation of peptide or polysaccharide antigen via MHC class II	TraesCS5B02G395000	1
BP	GO:0048002	antigen processing and presentation of peptide antigen	TraesCS5B02G395000	1
BP	GO:0019882	antigen processing and presentation	TraesCS5B02G395000	1
BP	GO:0007018	microtubule-based movement	TraesCS5B02G395000/TraesCS5B02G400900	2
BP	GO:0035066	positive regulation of histone acetylation	TraesCS5B02G395200	1
BP	GO:1901985	positive regulation of protein acetylation	TraesCS5B02G395200	1
BP	GO:2000758	positive regulation of peptidyl-lysine acetylation	TraesCS5B02G395200	1
BP	GO:0035065	regulation of histone acetylation	TraesCS5B02G395200	1
BP	GO:1901983	regulation of protein acetylation	TraesCS5B02G395200	1
BP	GO:2000756	regulation of peptidyl-lysine acetylation	TraesCS5B02G395200	1
BP	GO:0031058	positive regulation of histone modification	TraesCS5B02G395200	1
BP	GO:1905269	positive regulation of chromatin organization	TraesCS5B02G395200	1
BP	GO:0009631	cold acclimation	TraesCS5B02G395200	1
BP	GO:0031056	regulation of histone modification	TraesCS5B02G395200	1
BP	GO:1902275	regulation of chromatin organization	TraesCS5B02G395200	1
BP	GO:0016573	histone acetylation	TraesCS5B02G395200	1
BP	GO:0006475	internal protein amino acid acetylation	TraesCS5B02G395200	1
BP	GO:0018393	internal peptidyl-lysine acetylation	TraesCS5B02G395200	1
BP	GO:0018394	peptidyl-lysine acetylation	TraesCS5B02G395200	1
BP	GO:0042127	regulation of cell population proliferation	TraesCS5B02G395200	1
BP	GO:0006473	protein acetylation	TraesCS5B02G395200/TraesCS5B02G405900	2
BP	GO:2000014	regulation of endosperm development	TraesCS5B02G395400	1
BP	GO:0009960	endosperm development	TraesCS5B02G395400	1
BP	GO:0080050	regulation of seed development	TraesCS5B02G395400/TraesCS5B02G406300/TraesCS5B02G406300	3
BP	GO:0010584	pollen exine formation	TraesCS5B02G395500	1
BP	GO:0010208	pollen wall assembly	TraesCS5B02G395500	1
BP	GO:0085029	extracellular matrix assembly	TraesCS5B02G395500	1
BP	GO:0010927	cellular component assembly involved in morphogenesis	TraesCS5B02G395500	1
BP	GO:0030198	extracellular matrix organization	TraesCS5B02G395500/TraesCS5B02G396900/TraesCS5B02G397000/TraesCS5B02G397000	4
BP	GO:0043062	extracellular structure organization	TraesCS5B02G395500/TraesCS5B02G396900/TraesCS5B02G397000/TraesCS5B02G397000	4
BP	GO:0010540	basipetal auxin transport	TraesCS5B02G395700	1
BP	GO:0009956	radial pattern formation	TraesCS5B02G395700	1
BP	GO:0010305	leaf vascular tissue pattern formation	TraesCS5B02G395700	1
BP	GO:0010051	xylem and phloem pattern formation	TraesCS5B02G395700	1
BP	GO:0009965	leaf morphogenesis	TraesCS5B02G395700	1
BP	GO:0009933	meristem structural organization	TraesCS5B02G395700/TraesCS5B02G396600/TraesCS5B02G396600	3
BP	GO:0048532	anatomical structure arrangement	TraesCS5B02G395700/TraesCS5B02G396600/TraesCS5B02G396600	3
BP	GO:0010232	vascular transport	TraesCS5B02G395800	1
BP	GO:0010233	phloem transport	TraesCS5B02G395800	1
BP	GO:0003018	vascular process in circulatory system	TraesCS5B02G395800	1
BP	GO:0003013	circulatory system process	TraesCS5B02G395800	1
BP	GO:0006826	iron ion transport	TraesCS5B02G395800	1
BP	GO:0055072	iron ion homeostasis	TraesCS5B02G395800	1
BP	GO:0003008	system process	TraesCS5B02G395800	1
BP	GO:0006875	cellular metal ion homeostasis	TraesCS5B02G395800/TraesCS5B02G396400/TraesCS5B02G397500/TraesCS5B02G397600/TraesCS5B02G397600	5
BP	GO:0000706	meiotic DNA double-strand break processing	TraesCS5B02G396300	1
BP	GO:0000729	DNA double-strand break processing	TraesCS5B02G396300	1
BP	GO:0042138	meiotic DNA double-strand break formation	TraesCS5B02G396300	1
BP	GO:0051026	chiasma assembly	TraesCS5B02G396300	1
BP	GO:0007129	synapsis	TraesCS5B02G396300	1
BP	GO:0007131	reciprocal meiotic recombination	TraesCS5B02G396300	1
BP	GO:0035825	homologous recombination	TraesCS5B02G396300	1
BP	GO:0000724	double-strand break repair via homologous recombination	TraesCS5B02G396300	1
BP	GO:0000725	recombinational repair	TraesCS5B02G396300	1
BP	GO:0030322	stabilization of membrane potential	TraesCS5B02G396400	1
BP	GO:0006772	thiamine metabolic process	TraesCS5B02G396400	1
BP	GO:0009229	thiamine diphosphate biosynthetic process	TraesCS5B02G396400	1
BP	GO:0042357	thiamine diphosphate metabolic process	TraesCS5B02G396400	1
BP	GO:0042723	thiamine-containing compound metabolic process	TraesCS5B02G396400	1
BP	GO:0030007	cellular potassium ion homeostasis	TraesCS5B02G396400	1
BP	GO:0055075	potassium ion homeostasis	TraesCS5B02G396400	1
BP	GO:0072528	pyrimidine-containing compound biosynthetic process	TraesCS5B02G396400	1
BP	GO:0006767	water-soluble vitamin metabolic process	TraesCS5B02G396400	1
BP	GO:0072527	pyrimidine-containing compound metabolic process	TraesCS5B02G396400	1
BP	GO:0051260	protein homooligomerization	TraesCS5B02G396400	1
BP	GO:0010029	regulation of seed germination	TraesCS5B02G396400	1
BP	GO:0006766	vitamin metabolic process	TraesCS5B02G396400	1
BP	GO:1900140	regulation of seedling development	TraesCS5B02G396400	1
BP	GO:0044272	sulfur compound biosynthetic process	TraesCS5B02G396400	1
BP	GO:0051259	protein complex oligomerization	TraesCS5B02G396400	1
BP	GO:0042391	regulation of membrane potential	TraesCS5B02G396400/TraesCS5B02G400100/TraesCS5B02G400100	3
BP	GO:0071805	potassium ion transmembrane transport	TraesCS5B02G396400/TraesCS5B02G400100/TraesCS5B02G400100	3
BP	GO:0006813	potassium ion transport	TraesCS5B02G396400/TraesCS5B02G400100/TraesCS5B02G400100	3
BP	GO:0030004	cellular monovalent inorganic cation homeostasis	TraesCS5B02G396400/TraesCS5B02G402100	2
BP	GO:0055067	monovalent inorganic cation homeostasis	TraesCS5B02G396400/TraesCS5B02G402100	2
BP	GO:0010119	regulation of stomatal movement	TraesCS5B02G396400/TraesCS5B02G406300/TraesCS5B02G406300	3
BP	GO:0010077	maintenance of inflorescence meristem identity	TraesCS5B02G396600/TraesCS5B02G396600	2
BP	GO:0010582	floral meristem determinacy	TraesCS5B02G396600/TraesCS5B02G396600	2
BP	GO:0010022	meristem determinacy	TraesCS5B02G396600/TraesCS5B02G396600	2
BP	GO:0010074	maintenance of meristem identity	TraesCS5B02G396600/TraesCS5B02G396600	2
BP	GO:0009911	positive regulation of flower development	TraesCS5B02G396600/TraesCS5B02G396600	2
BP	GO:0019827	stem cell population maintenance	TraesCS5B02G396600/TraesCS5B02G396600	2
BP	GO:0098727	maintenance of cell number	TraesCS5B02G396600/TraesCS5B02G396600	2
BP	GO:2000243	positive regulation of reproductive process	TraesCS5B02G396600/TraesCS5B02G396600	2
BP	GO:0048582	positive regulation of post-embryonic development	TraesCS5B02G396600/TraesCS5B02G396600	2
BP	GO:0010215	cellulose microfibril organization	TraesCS5B02G396900/TraesCS5B02G397000/TraesCS5B02G397000	3
BP	GO:0070726	cell wall assembly	TraesCS5B02G396900/TraesCS5B02G397000/TraesCS5B02G397000	3
BP	GO:0071668	plant-type cell wall assembly	TraesCS5B02G396900/TraesCS5B02G397000/TraesCS5B02G397000	3
BP	GO:0006839	mitochondrial transport	TraesCS5B02G397100	1
BP	GO:0006353	DNA-templated transcription	TraesCS5B02G397200	1
BP	GO:0006369	termination of RNA polymerase II transcription	TraesCS5B02G397200	1
BP	GO:0031124	mRNA 3'-end processing	TraesCS5B02G397200	1
BP	GO:0007265	Ras protein signal transduction	TraesCS5B02G397300	1
BP	GO:0007264	small GTPase mediated signal transduction	TraesCS5B02G397300	1
BP	GO:0016477	cell migration	TraesCS5B02G397300	1
BP	GO:0032147	activation of protein kinase activity	TraesCS5B02G397300	1
BP	GO:0043408	regulation of MAPK cascade	TraesCS5B02G397300	1
BP	GO:0031098	stress-activated protein kinase signaling cascade	TraesCS5B02G397300	1
BP	GO:0000165	MAPK cascade	TraesCS5B02G397300	1
BP	GO:0045860	positive regulation of protein kinase activity	TraesCS5B02G397300	1
BP	GO:0033674	positive regulation of kinase activity	TraesCS5B02G397300	1
BP	GO:0023014	signal transduction by protein phosphorylation	TraesCS5B02G397300	1
BP	GO:0001934	positive regulation of protein phosphorylation	TraesCS5B02G397300	1
BP	GO:0042327	positive regulation of phosphorylation	TraesCS5B02G397300	1
BP	GO:0010562	positive regulation of phosphorus metabolic process	TraesCS5B02G397300	1
BP	GO:0045937	positive regulation of phosphate metabolic process	TraesCS5B02G397300	1
BP	GO:0051347	positive regulation of transferase activity	TraesCS5B02G397300	1
BP	GO:0045859	regulation of protein kinase activity	TraesCS5B02G397300	1
BP	GO:1902602	aluminum ion transmembrane transport	TraesCS5B02G397500/TraesCS5B02G397600/TraesCS5B02G397600	3
BP	GO:0010044	response to aluminum ion	TraesCS5B02G397500/TraesCS5B02G397600/TraesCS5B02G397600	3
BP	GO:0006065	UDP-glucuronate biosynthetic process	TraesCS5B02G399800	1
BP	GO:0006023	aminoglycan biosynthetic process	TraesCS5B02G399800	1
BP	GO:0006024	glycosaminoglycan biosynthetic process	TraesCS5B02G399800	1
BP	GO:0046398	UDP-glucuronate metabolic process	TraesCS5B02G399800	1
BP	GO:0030203	glycosaminoglycan metabolic process	TraesCS5B02G399800	1
BP	GO:0006022	aminoglycan metabolic process	TraesCS5B02G399800	1
BP	GO:0009226	nucleotide-sugar biosynthetic process	TraesCS5B02G399800	1
BP	GO:0009225	nucleotide-sugar metabolic process	TraesCS5B02G399800	1
BP	GO:0052546	cell wall pectin metabolic process	TraesCS5B02G399800/TraesCS5B02G406500	2
BP	GO:0045488	pectin metabolic process	TraesCS5B02G399800/TraesCS5B02G406500	2
BP	GO:0010393	galacturonan metabolic process	TraesCS5B02G399800/TraesCS5B02G406500	2
BP	GO:0005980	glycogen catabolic process	TraesCS5B02G400000/TraesCS5B02G400000	2
BP	GO:0005977	glycogen metabolic process	TraesCS5B02G400000/TraesCS5B02G400000	2
BP	GO:0006112	energy reserve metabolic process	TraesCS5B02G400000/TraesCS5B02G400000	2
BP	GO:0044247	cellular polysaccharide catabolic process	TraesCS5B02G400000/TraesCS5B02G400000	2
BP	GO:0044275	cellular carbohydrate catabolic process	TraesCS5B02G400000/TraesCS5B02G400000	2
BP	GO:0015980	energy derivation by oxidation of organic compounds	TraesCS5B02G400000/TraesCS5B02G400000	2
BP	GO:0007263	nitric oxide mediated signal transduction	TraesCS5B02G400100/TraesCS5B02G400100	2
BP	GO:0070509	calcium ion import	TraesCS5B02G400100/TraesCS5B02G400100	2
BP	GO:0019932	second-messenger-mediated signaling	TraesCS5B02G400100/TraesCS5B02G400100	2
BP	GO:0009626	plant-type hypersensitive response	TraesCS5B02G400100/TraesCS5B02G400100	2
BP	GO:0034050	host programmed cell death induced by symbiont	TraesCS5B02G400100/TraesCS5B02G400100	2
BP	GO:0070588	calcium ion transmembrane transport	TraesCS5B02G400100/TraesCS5B02G400100	2
BP	GO:0006816	calcium ion transport	TraesCS5B02G400100/TraesCS5B02G400100/TraesCS5B02G402100	3
BP	GO:0046283	anthocyanin-containing compound metabolic process	TraesCS5B02G400200	1
BP	GO:0009812	flavonoid metabolic process	TraesCS5B02G400200	1
BP	GO:0006505	GPI anchor metabolic process	TraesCS5B02G400500	1
BP	GO:0006506	GPI anchor biosynthetic process	TraesCS5B02G400500	1
BP	GO:0006661	phosphatidylinositol biosynthetic process	TraesCS5B02G400500	1
BP	GO:0009247	glycolipid biosynthetic process	TraesCS5B02G400500	1
BP	GO:0046474	glycerophospholipid biosynthetic process	TraesCS5B02G400500	1
BP	GO:0006664	glycolipid metabolic process	TraesCS5B02G400500	1
BP	GO:1903509	liposaccharide metabolic process	TraesCS5B02G400500	1
BP	GO:0046488	phosphatidylinositol metabolic process	TraesCS5B02G400500	1
BP	GO:0046467	membrane lipid biosynthetic process	TraesCS5B02G400500	1
BP	GO:0045017	glycerolipid biosynthetic process	TraesCS5B02G400500	1
BP	GO:0006643	membrane lipid metabolic process	TraesCS5B02G400500	1
BP	GO:0006650	glycerophospholipid metabolic process	TraesCS5B02G400500	1
BP	GO:0008654	phospholipid biosynthetic process	TraesCS5B02G400500	1
BP	GO:0009558	embryo sac cellularization	TraesCS5B02G400900	1
BP	GO:0007349	cellularization	TraesCS5B02G400900	1
BP	GO:0090307	mitotic spindle assembly	TraesCS5B02G400900	1
BP	GO:0051225	spindle assembly	TraesCS5B02G400900	1
BP	GO:0000911	cytokinesis by cell plate formation	TraesCS5B02G400900	1
BP	GO:0032506	cytokinetic process	TraesCS5B02G400900	1
BP	GO:1902410	mitotic cytokinetic process	TraesCS5B02G400900	1
BP	GO:0007052	mitotic spindle organization	TraesCS5B02G400900/TraesCS5B02G406600	2
BP	GO:1902850	microtubule cytoskeleton organization involved in mitosis	TraesCS5B02G400900/TraesCS5B02G406600	2
BP	GO:0007051	spindle organization	TraesCS5B02G400900/TraesCS5B02G406600	2
BP	GO:0009744	response to sucrose	TraesCS5B02G401200/TraesCS5B02G401200/TraesCS5B02G402000/TraesCS5B02G403300/TraesCS5B02G403300	5
BP	GO:0034285	response to disaccharide	TraesCS5B02G401200/TraesCS5B02G401200/TraesCS5B02G402000/TraesCS5B02G403300/TraesCS5B02G403300	5
BP	GO:0040034	regulation of development	TraesCS5B02G401200/TraesCS5B02G401200/TraesCS5B02G403300/TraesCS5B02G403300	4
BP	GO:2000035	regulation of stem cell division	TraesCS5B02G401200/TraesCS5B02G401200/TraesCS5B02G403300/TraesCS5B02G403300	4
BP	GO:0017145	stem cell division	TraesCS5B02G401200/TraesCS5B02G401200/TraesCS5B02G403300/TraesCS5B02G403300	4
BP	GO:0010105	negative regulation of ethylene-activated signaling pathway	TraesCS5B02G401200/TraesCS5B02G401200/TraesCS5B02G403300/TraesCS5B02G403300	4
BP	GO:0070298	negative regulation of phosphorelay signal transduction system	TraesCS5B02G401200/TraesCS5B02G401200/TraesCS5B02G403300/TraesCS5B02G403300	4
BP	GO:2000069	regulation of post-embryonic root development	TraesCS5B02G401200/TraesCS5B02G401200/TraesCS5B02G403300/TraesCS5B02G403300	4
BP	GO:0009686	gibberellin biosynthetic process	TraesCS5B02G401200/TraesCS5B02G401200/TraesCS5B02G403300/TraesCS5B02G403300	4
BP	GO:0009750	response to fructose	TraesCS5B02G401200/TraesCS5B02G401200/TraesCS5B02G403300/TraesCS5B02G403300	4
BP	GO:0010104	regulation of ethylene-activated signaling pathway	TraesCS5B02G401200/TraesCS5B02G401200/TraesCS5B02G403300/TraesCS5B02G403300	4
BP	GO:0070297	regulation of phosphorelay signal transduction system	TraesCS5B02G401200/TraesCS5B02G401200/TraesCS5B02G403300/TraesCS5B02G403300	4
BP	GO:0009685	gibberellin metabolic process	TraesCS5B02G401200/TraesCS5B02G401200/TraesCS5B02G403300/TraesCS5B02G403300	4
BP	GO:0016102	diterpenoid biosynthetic process	TraesCS5B02G401200/TraesCS5B02G401200/TraesCS5B02G403300/TraesCS5B02G403300	4
BP	GO:0048506	regulation of timing of meristematic phase transition	TraesCS5B02G401200/TraesCS5B02G401200/TraesCS5B02G403300/TraesCS5B02G403300	4
BP	GO:0048510	regulation of timing of transition from vegetative to reproductive phase	TraesCS5B02G401200/TraesCS5B02G401200/TraesCS5B02G403300/TraesCS5B02G403300	4
BP	GO:1902532	negative regulation of intracellular signal transduction	TraesCS5B02G401200/TraesCS5B02G401200/TraesCS5B02G403300/TraesCS5B02G403300	4
BP	GO:0071281	cellular response to iron ion	TraesCS5B02G401200/TraesCS5B02G401200/TraesCS5B02G403300/TraesCS5B02G403300	4
BP	GO:0016101	diterpenoid metabolic process	TraesCS5B02G401200/TraesCS5B02G401200/TraesCS5B02G403300/TraesCS5B02G403300	4
BP	GO:0010039	response to iron ion	TraesCS5B02G401200/TraesCS5B02G401200/TraesCS5B02G403300/TraesCS5B02G403300	4
BP	GO:0009746	response to hexose	TraesCS5B02G401200/TraesCS5B02G401200/TraesCS5B02G403300/TraesCS5B02G403300	4
BP	GO:0034284	response to monosaccharide	TraesCS5B02G401200/TraesCS5B02G401200/TraesCS5B02G403300/TraesCS5B02G403300	4
BP	GO:0071248	cellular response to metal ion	TraesCS5B02G401200/TraesCS5B02G401200/TraesCS5B02G403300/TraesCS5B02G403300	4
BP	GO:0001666	response to hypoxia	TraesCS5B02G401200/TraesCS5B02G401200/TraesCS5B02G403300/TraesCS5B02G403300	4
BP	GO:0036293	response to decreased oxygen levels	TraesCS5B02G401200/TraesCS5B02G401200/TraesCS5B02G403300/TraesCS5B02G403300	4
BP	GO:0071241	cellular response to inorganic substance	TraesCS5B02G401200/TraesCS5B02G401200/TraesCS5B02G403300/TraesCS5B02G403300	4
BP	GO:2000280	regulation of root development	TraesCS5B02G401200/TraesCS5B02G401200/TraesCS5B02G403300/TraesCS5B02G403300/TraesCS5B02G406300/TraesCS5B02G406300	6
BP	GO:0009873	ethylene-activated signaling pathway	TraesCS5B02G401200/TraesCS5B02G401200/TraesCS5B02G403300/TraesCS5B02G403300/TraesCS5B02G406300/TraesCS5B02G406300	6
BP	GO:0007094	mitotic spindle assembly checkpoint	TraesCS5B02G401600	1
BP	GO:0071173	spindle assembly checkpoint	TraesCS5B02G401600	1
BP	GO:0031577	spindle checkpoint	TraesCS5B02G401600	1
BP	GO:0071174	mitotic spindle checkpoint	TraesCS5B02G401600	1
BP	GO:0045841	negative regulation of mitotic metaphase/anaphase transition	TraesCS5B02G401600	1
BP	GO:1902100	negative regulation of metaphase/anaphase transition of cell cycle	TraesCS5B02G401600	1
BP	GO:1905819	negative regulation of chromosome separation	TraesCS5B02G401600	1
BP	GO:2000816	negative regulation of mitotic sister chromatid separation	TraesCS5B02G401600	1
BP	GO:0033048	negative regulation of mitotic sister chromatid segregation	TraesCS5B02G401600	1
BP	GO:0007091	metaphase/anaphase transition of mitotic cell cycle	TraesCS5B02G401600	1
BP	GO:0010965	regulation of mitotic sister chromatid separation	TraesCS5B02G401600	1
BP	GO:0030071	regulation of mitotic metaphase/anaphase transition	TraesCS5B02G401600	1
BP	GO:0044784	metaphase/anaphase transition of cell cycle	TraesCS5B02G401600	1
BP	GO:1902099	regulation of metaphase/anaphase transition of cell cycle	TraesCS5B02G401600	1
BP	GO:1905818	regulation of chromosome separation	TraesCS5B02G401600	1
BP	GO:0051306	mitotic sister chromatid separation	TraesCS5B02G401600	1
BP	GO:0045839	negative regulation of mitotic nuclear division	TraesCS5B02G401600	1
BP	GO:0033047	regulation of mitotic sister chromatid segregation	TraesCS5B02G401600	1
BP	GO:0051784	negative regulation of nuclear division	TraesCS5B02G401600	1
BP	GO:0007088	regulation of mitotic nuclear division	TraesCS5B02G401600	1
BP	GO:0051304	chromosome separation	TraesCS5B02G401600	1
BP	GO:1901991	negative regulation of mitotic cell cycle phase transition	TraesCS5B02G401600	1
BP	GO:1901988	negative regulation of cell cycle phase transition	TraesCS5B02G401600	1
BP	GO:0051783	regulation of nuclear division	TraesCS5B02G401600	1
BP	GO:0000070	mitotic sister chromatid segregation	TraesCS5B02G401600	1
BP	GO:0007093	mitotic cell cycle checkpoint	TraesCS5B02G401600	1
BP	GO:0000075	cell cycle checkpoint	TraesCS5B02G401600	1
BP	GO:0045930	negative regulation of mitotic cell cycle	TraesCS5B02G401600	1
BP	GO:1901990	regulation of mitotic cell cycle phase transition	TraesCS5B02G401600	1
BP	GO:1901987	regulation of cell cycle phase transition	TraesCS5B02G401600	1
BP	GO:0044772	mitotic cell cycle phase transition	TraesCS5B02G401600	1
BP	GO:0044770	cell cycle phase transition	TraesCS5B02G401600	1
BP	GO:0006270	DNA replication initiation	TraesCS5B02G402000	1
BP	GO:0051924	regulation of calcium ion transport	TraesCS5B02G402100	1
BP	GO:0010959	regulation of metal ion transport	TraesCS5B02G402100	1
BP	GO:0043269	regulation of ion transport	TraesCS5B02G402100	1
BP	GO:0080147	root hair cell development	TraesCS5B02G402100	1
BP	GO:0048764	trichoblast maturation	TraesCS5B02G402100	1
BP	GO:0048765	root hair cell differentiation	TraesCS5B02G402100	1
BP	GO:0010054	trichoblast differentiation	TraesCS5B02G402100	1
BP	GO:0046500	S-adenosylmethionine metabolic process	TraesCS5B02G404100/TraesCS5B02G404100	2
BP	GO:0035246	peptidyl-arginine N-methylation	TraesCS5B02G404100/TraesCS5B02G404100	2
BP	GO:0046128	purine ribonucleoside metabolic process	TraesCS5B02G404100/TraesCS5B02G404100	2
BP	GO:0018195	peptidyl-arginine modification	TraesCS5B02G404100/TraesCS5B02G404100	2
BP	GO:0018216	peptidyl-arginine methylation	TraesCS5B02G404100/TraesCS5B02G404100	2
BP	GO:0042278	purine nucleoside metabolic process	TraesCS5B02G404100/TraesCS5B02G404100	2
BP	GO:0009119	ribonucleoside metabolic process	TraesCS5B02G404100/TraesCS5B02G404100	2
BP	GO:0009116	nucleoside metabolic process	TraesCS5B02G404100/TraesCS5B02G404100	2
BP	GO:0006575	cellular modified amino acid metabolic process	TraesCS5B02G404100/TraesCS5B02G404100	2
BP	GO:0098869	cellular oxidant detoxification	TraesCS5B02G404200/TraesCS5B02G404300/TraesCS5B02G408100	3
BP	GO:1990748	cellular detoxification	TraesCS5B02G404200/TraesCS5B02G404300/TraesCS5B02G408100	3
BP	GO:0097237	cellular response to toxic substance	TraesCS5B02G404200/TraesCS5B02G404300/TraesCS5B02G408100	3
BP	GO:0051781	positive regulation of cell division	TraesCS5B02G405200/TraesCS5B02G405200/TraesCS5B02G405200	3
BP	GO:0009640	photomorphogenesis	TraesCS5B02G405900	1
BP	GO:0080113	regulation of seed growth	TraesCS5B02G406300/TraesCS5B02G406300	2
BP	GO:0010088	phloem development	TraesCS5B02G406300/TraesCS5B02G406300	2
BP	GO:0010082	regulation of root meristem growth	TraesCS5B02G406300/TraesCS5B02G406300	2
BP	GO:0080112	seed growth	TraesCS5B02G406300/TraesCS5B02G406300	2
BP	GO:0010449	root meristem growth	TraesCS5B02G406300/TraesCS5B02G406300	2
BP	GO:0010075	regulation of meristem growth	TraesCS5B02G406300/TraesCS5B02G406300	2
BP	GO:0010089	xylem development	TraesCS5B02G406300/TraesCS5B02G406300	2
BP	GO:0035266	meristem growth	TraesCS5B02G406300/TraesCS5B02G406300	2
BP	GO:0010087	phloem or xylem histogenesis	TraesCS5B02G406300/TraesCS5B02G406300	2
BP	GO:0032881	regulation of polysaccharide metabolic process	TraesCS5B02G406500	1
BP	GO:0010052	guard cell differentiation	TraesCS5B02G406500	1
BP	GO:1903338	regulation of cell wall organization or biogenesis	TraesCS5B02G406500	1
BP	GO:0010103	stomatal complex morphogenesis	TraesCS5B02G406500	1
BP	GO:0006109	regulation of carbohydrate metabolic process	TraesCS5B02G406500	1
BP	GO:0010374	stomatal complex development	TraesCS5B02G406500	1
BP	GO:0035404	histone-serine phosphorylation	TraesCS5B02G406600	1
BP	GO:0043987	histone H3-S10 phosphorylation	TraesCS5B02G406600	1
BP	GO:0043988	histone H3-S28 phosphorylation	TraesCS5B02G406600	1
BP	GO:0016572	histone phosphorylation	TraesCS5B02G406600	1
BP	GO:0032465	regulation of cytokinesis	TraesCS5B02G406600	1
BP	GO:0018105	peptidyl-serine phosphorylation	TraesCS5B02G406600	1
BP	GO:0018209	peptidyl-serine modification	TraesCS5B02G406600	1
BP	GO:0006465	signal peptide processing	TraesCS5B02G406800/TraesCS5B02G406800/TraesCS5B02G406800/TraesCS5B02G406800/TraesCS5B02G406800	5
BP	GO:0016485	protein processing	TraesCS5B02G406800/TraesCS5B02G406800/TraesCS5B02G406800/TraesCS5B02G406800/TraesCS5B02G406800	5
BP	GO:0006606	protein import into nucleus	TraesCS5B02G406900	1
BP	GO:0051170	import into nucleus	TraesCS5B02G406900	1
BP	GO:0010183	pollen tube guidance	TraesCS5B02G407200	1
BP	GO:0050918	positive chemotaxis	TraesCS5B02G407200	1
BP	GO:0080060	integument development	TraesCS5B02G407600	1
BP	GO:0048481	plant ovule development	TraesCS5B02G407600	1
BP	GO:0035670	plant-type ovary development	TraesCS5B02G407600	1
BP	GO:0048440	carpel development	TraesCS5B02G407600	1
BP	GO:0048467	gynoecium development	TraesCS5B02G407600	1
BP	GO:0019373	epoxygenase P450 pathway	TraesCS5B02G408000	1
BP	GO:0031407	oxylipin metabolic process	TraesCS5B02G408000	1
BP	GO:0019369	arachidonic acid metabolic process	TraesCS5B02G408000	1
BP	GO:0009695	jasmonic acid biosynthetic process	TraesCS5B02G408000	1
BP	GO:0006690	icosanoid metabolic process	TraesCS5B02G408000	1
BP	GO:0033559	unsaturated fatty acid metabolic process	TraesCS5B02G408000	1
BP	GO:0009694	jasmonic acid metabolic process	TraesCS5B02G408000	1
BP	GO:0001676	long-chain fatty acid metabolic process	TraesCS5B02G408000	1
BP	GO:0016125	sterol metabolic process	TraesCS5B02G408000	1
BP	GO:0008202	steroid metabolic process	TraesCS5B02G408000	1
BP	GO:1901568	fatty acid derivative metabolic process	TraesCS5B02G408000	1
BP	GO:0010190	cytochrome b6f complex assembly	TraesCS5B02G408100	1
BP	GO:0017004	cytochrome complex assembly	TraesCS5B02G408100	1
BP	GO:0045454	cell redox homeostasis	TraesCS5B02G408100	1
BP	GO:0034599	cellular response to oxidative stress	TraesCS5B02G408100	1
BP	GO:0009624	response to nematode	TraesCS5B02G408500	1
BP	GO:0000462	maturation of SSU-rRNA from tricistronic rRNA transcript (SSU-rRNA	TraesCS5B02G409400	1
BP	GO:0030490	maturation of SSU-rRNA	TraesCS5B02G409400	1
BP	GO:0042274	ribosomal small subunit biogenesis	TraesCS5B02G409400	1
CC	GO:0005875	microtubule associated complex	TraesCS5B02G381100/TraesCS5B02G395000/TraesCS5B02G400900/TraesCS5B02G406600	4
CC	GO:0005834	heterotrimeric G-protein complex	TraesCS5B02G381300	1
CC	GO:1905360	GTPase complex	TraesCS5B02G381300	1
CC	GO:0031234	extrinsic component of cytoplasmic side of plasma membrane	TraesCS5B02G381300	1
CC	GO:0098797	plasma membrane protein complex	TraesCS5B02G381300	1
CC	GO:0019897	extrinsic component of plasma membrane	TraesCS5B02G381300	1
CC	GO:0009898	cytoplasmic side of plasma membrane	TraesCS5B02G381300	1
CC	GO:0032588	trans-Golgi network membrane	TraesCS5B02G381300	1
CC	GO:0098562	cytoplasmic side of membrane	TraesCS5B02G381300	1
CC	GO:0000139	Golgi membrane	TraesCS5B02G381300	1
CC	GO:0019898	extrinsic component of membrane	TraesCS5B02G381300/TraesCS5B02G386700/TraesCS5B02G386700	3
CC	GO:0098552	side of membrane	TraesCS5B02G381300/TraesCS5B02G396900/TraesCS5B02G397000/TraesCS5B02G397000	4
CC	GO:0001673	male germ cell nucleus	TraesCS5B02G382000/TraesCS5B02G382000/TraesCS5B02G382000/TraesCS5B02G382000/TraesCS5B02G382000	5
CC	GO:0043073	germ cell nucleus	TraesCS5B02G382000/TraesCS5B02G382000/TraesCS5B02G382000/TraesCS5B02G382000/TraesCS5B02G382000	5
CC	GO:0019005	SCF ubiquitin ligase complex	TraesCS5B02G382000/TraesCS5B02G382000/TraesCS5B02G382000/TraesCS5B02G382000/TraesCS5B02G382000	5
CC	GO:0005826	actomyosin contractile ring	TraesCS5B02G382700/TraesCS5B02G391400/TraesCS5B02G391400	3
CC	GO:0070938	contractile ring	TraesCS5B02G382700/TraesCS5B02G391400/TraesCS5B02G391400	3
CC	GO:0030864	cortical actin cytoskeleton	TraesCS5B02G382700/TraesCS5B02G391400/TraesCS5B02G391400	3
CC	GO:0030863	cortical cytoskeleton	TraesCS5B02G382700/TraesCS5B02G391400/TraesCS5B02G391400	3
CC	GO:0015629	actin cytoskeleton	TraesCS5B02G382700/TraesCS5B02G391400/TraesCS5B02G391400	3
CC	GO:0032153	cell division site	TraesCS5B02G382700/TraesCS5B02G391400/TraesCS5B02G391400/TraesCS5B02G392200	4
CC	GO:0030897	HOPS complex	TraesCS5B02G384200/TraesCS5B02G384200/TraesCS5B02G384200	3
CC	GO:0033263	CORVET complex	TraesCS5B02G384200/TraesCS5B02G384200/TraesCS5B02G384200	3
CC	GO:0099023	vesicle tethering complex	TraesCS5B02G384200/TraesCS5B02G384200/TraesCS5B02G384200	3
CC	GO:0030127	COPII vesicle coat	TraesCS5B02G386700/TraesCS5B02G386700	2
CC	GO:0070971	endoplasmic reticulum exit site	TraesCS5B02G386700/TraesCS5B02G386700	2
CC	GO:0012507	ER to Golgi transport vesicle membrane	TraesCS5B02G386700/TraesCS5B02G386700	2
CC	GO:0030134	COPII-coated ER to Golgi transport vesicle	TraesCS5B02G386700/TraesCS5B02G386700	2
CC	GO:0030658	transport vesicle membrane	TraesCS5B02G386700/TraesCS5B02G386700	2
CC	GO:0030120	vesicle coat	TraesCS5B02G386700/TraesCS5B02G386700	2
CC	GO:0030117	membrane coat	TraesCS5B02G386700/TraesCS5B02G386700	2
CC	GO:0048475	coated membrane	TraesCS5B02G386700/TraesCS5B02G386700	2
CC	GO:0030662	coated vesicle membrane	TraesCS5B02G386700/TraesCS5B02G386700	2
CC	GO:0030660	Golgi-associated vesicle membrane	TraesCS5B02G386700/TraesCS5B02G386700	2
CC	GO:0030133	transport vesicle	TraesCS5B02G386700/TraesCS5B02G386700	2
CC	GO:0005798	Golgi-associated vesicle	TraesCS5B02G386700/TraesCS5B02G386700	2
CC	GO:0030135	coated vesicle	TraesCS5B02G386700/TraesCS5B02G386700	2
CC	GO:0030659	cytoplasmic vesicle membrane	TraesCS5B02G386700/TraesCS5B02G386700	2
CC	GO:0012506	vesicle membrane	TraesCS5B02G386700/TraesCS5B02G386700	2
CC	GO:0000932	P-body	TraesCS5B02G387800/TraesCS5B02G387800/TraesCS5B02G387800	3
CC	GO:0036464	cytoplasmic ribonucleoprotein granule	TraesCS5B02G387800/TraesCS5B02G387800/TraesCS5B02G387800	3
CC	GO:0035770	ribonucleoprotein granule	TraesCS5B02G387800/TraesCS5B02G387800/TraesCS5B02G387800	3
CC	GO:0000177	cytoplasmic exosome (RNase complex)	TraesCS5B02G389300	1
CC	GO:0000178	exosome (RNase complex)	TraesCS5B02G389300	1
CC	GO:1905354	exoribonuclease complex	TraesCS5B02G389300	1
CC	GO:0043527	tRNA methyltransferase complex	TraesCS5B02G389600	1
CC	GO:0034708	methyltransferase complex	TraesCS5B02G389600	1
CC	GO:0005700	polytene chromosome	TraesCS5B02G391200	1
CC	GO:0016581	NuRD complex	TraesCS5B02G391200	1
CC	GO:0090545	CHD-type complex	TraesCS5B02G391200	1
CC	GO:0000118	histone deacetylase complex	TraesCS5B02G391200	1
CC	GO:0035327	transcriptionally active chromatin	TraesCS5B02G391200	1
CC	GO:0017053	transcription repressor complex	TraesCS5B02G391200	1
CC	GO:0070603	SWI/SNF superfamily-type complex	TraesCS5B02G391200	1
CC	GO:0000790	nuclear chromatin	TraesCS5B02G391200	1
CC	GO:1904949	ATPase complex	TraesCS5B02G391200/TraesCS5B02G396400	2
CC	GO:0009543	chloroplast thylakoid lumen	TraesCS5B02G391300	1
CC	GO:0031978	plastid thylakoid lumen	TraesCS5B02G391300	1
CC	GO:0031977	thylakoid lumen	TraesCS5B02G391300/TraesCS5B02G408100	2
CC	GO:0016461	unconventional myosin complex	TraesCS5B02G391400/TraesCS5B02G391400	2
CC	GO:0032982	myosin filament	TraesCS5B02G391400/TraesCS5B02G391400	2
CC	GO:0045179	apical cortex	TraesCS5B02G391400/TraesCS5B02G391400	2
CC	GO:0097204	phagocytic cup base	TraesCS5B02G391400/TraesCS5B02G391400	2
CC	GO:0001931	uropod	TraesCS5B02G391400/TraesCS5B02G391400	2
CC	GO:0031254	cell trailing edge	TraesCS5B02G391400/TraesCS5B02G391400	2
CC	GO:1990753	equatorial cell cortex	TraesCS5B02G391400/TraesCS5B02G391400	2
CC	GO:0001891	phagocytic cup	TraesCS5B02G391400/TraesCS5B02G391400	2
CC	GO:0016460	myosin II complex	TraesCS5B02G391400/TraesCS5B02G391400	2
CC	GO:0016459	myosin complex	TraesCS5B02G391400/TraesCS5B02G391400	2
CC	GO:0032009	early phagosome	TraesCS5B02G391400/TraesCS5B02G391400	2
CC	GO:0042641	actomyosin	TraesCS5B02G391400/TraesCS5B02G391400	2
CC	GO:0099738	cell cortex region	TraesCS5B02G391400/TraesCS5B02G391400	2
CC	GO:0045335	phagocytic vesicle	TraesCS5B02G391400/TraesCS5B02G391400	2
CC	GO:0030139	endocytic vesicle	TraesCS5B02G391400/TraesCS5B02G391400	2
CC	GO:0045177	apical part of cell	TraesCS5B02G391400/TraesCS5B02G391400	2
CC	GO:0042597	periplasmic space	TraesCS5B02G393300/TraesCS5B02G393300/TraesCS5B02G393700/TraesCS5B02G393800/TraesCS5B02G393900/TraesCS5B02G394000	6
CC	GO:0005813	centrosome	TraesCS5B02G395000	1
CC	GO:0005815	microtubule organizing center	TraesCS5B02G395000	1
CC	GO:0005871	kinesin complex	TraesCS5B02G395000/TraesCS5B02G400900	2
CC	GO:0005819	spindle	TraesCS5B02G395000/TraesCS5B02G406600	2
CC	GO:0046658	anchored component of plasma membrane	TraesCS5B02G395500/TraesCS5B02G396900/TraesCS5B02G397000/TraesCS5B02G397000	4
CC	GO:1902495	transmembrane transporter complex	TraesCS5B02G396400	1
CC	GO:1990351	transporter complex	TraesCS5B02G396400	1
CC	GO:0010319	stromule	TraesCS5B02G396800	1
CC	GO:0009707	chloroplast outer membrane	TraesCS5B02G396800	1
CC	GO:0009527	plastid outer membrane	TraesCS5B02G396800	1
CC	GO:0031969	chloroplast membrane	TraesCS5B02G396800	1
CC	GO:0042170	plastid membrane	TraesCS5B02G396800	1
CC	GO:0019867	outer membrane	TraesCS5B02G396800/TraesCS5B02G397100	2
CC	GO:0031968	organelle outer membrane	TraesCS5B02G396800/TraesCS5B02G397100	2
CC	GO:0009897	external side of plasma membrane	TraesCS5B02G396900/TraesCS5B02G397000/TraesCS5B02G397000	3
CC	GO:0009986	cell surface	TraesCS5B02G396900/TraesCS5B02G397000/TraesCS5B02G397000	3
CC	GO:0031306	intrinsic component of mitochondrial outer membrane	TraesCS5B02G397100	1
CC	GO:0031307	integral component of mitochondrial outer membrane	TraesCS5B02G397100	1
CC	GO:0032592	integral component of mitochondrial membrane	TraesCS5B02G397100	1
CC	GO:0098573	intrinsic component of mitochondrial membrane	TraesCS5B02G397100	1
CC	GO:0005741	mitochondrial outer membrane	TraesCS5B02G397100	1
CC	GO:0031301	integral component of organelle membrane	TraesCS5B02G397100	1
CC	GO:0031300	intrinsic component of organelle membrane	TraesCS5B02G397100	1
CC	GO:0042788	polysomal ribosome	TraesCS5B02G397800	1
CC	GO:0005844	polysome	TraesCS5B02G397800	1
CC	GO:0022625	cytosolic large ribosomal subunit	TraesCS5B02G397800	1
CC	GO:0015934	large ribosomal subunit	TraesCS5B02G397800	1
CC	GO:0009501	amyloplast	TraesCS5B02G400000/TraesCS5B02G400000	2
CC	GO:0009524	phragmoplast	TraesCS5B02G400900/TraesCS5B02G401600	2
CC	GO:0000775	chromosome	TraesCS5B02G400900/TraesCS5B02G401600/TraesCS5B02G406600	3
CC	GO:0098687	chromosomal region	TraesCS5B02G400900/TraesCS5B02G401600/TraesCS5B02G406600	3
CC	GO:1990298	bub1-bub3 complex	TraesCS5B02G401600	1
CC	GO:0033597	mitotic checkpoint complex	TraesCS5B02G401600	1
CC	GO:0000776	kinetochore	TraesCS5B02G401600	1
CC	GO:0080008	Cul4-RING E3 ubiquitin ligase complex	TraesCS5B02G401600	1
CC	GO:0000808	origin recognition complex	TraesCS5B02G402000	1
CC	GO:0005664	nuclear origin of replication recognition complex	TraesCS5B02G402000	1
CC	GO:0090406	pollen tube	TraesCS5B02G403800	1
CC	GO:0005615	extracellular space	TraesCS5B02G403800	1
CC	GO:0000780	condensed nuclear chromosome	TraesCS5B02G406600	1
CC	GO:0000779	condensed chromosome	TraesCS5B02G406600	1
CC	GO:0032133	chromosome passenger complex	TraesCS5B02G406600	1
CC	GO:0051233	spindle midzone	TraesCS5B02G406600	1
CC	GO:0005876	spindle microtubule	TraesCS5B02G406600	1
CC	GO:0048471	perinuclear region of cytoplasm	TraesCS5B02G406600	1
CC	GO:0000794	condensed nuclear chromosome	TraesCS5B02G406600	1
CC	GO:0000793	condensed chromosome	TraesCS5B02G406600	1
CC	GO:0005874	microtubule	TraesCS5B02G406600	1
CC	GO:0005643	nuclear pore	TraesCS5B02G406900	1
CC	GO:0010287	plastoglobule	TraesCS5B02G408000	1
CC	GO:0000312	plastid small ribosomal subunit	TraesCS5B02G409400	1
CC	GO:0009547	plastid ribosome	TraesCS5B02G409400	1
CC	GO:0000314	organellar small ribosomal subunit	TraesCS5B02G409400	1
CC	GO:0000313	organellar ribosome	TraesCS5B02G409400	1
CC	GO:0015935	small ribosomal subunit	TraesCS5B02G409400	1
MF	GO:0090416	nicotinate transmembrane transporter activity	TraesCS5B02G380500/TraesCS5B02G380600/TraesCS5B02G380600/TraesCS5B02G380600/TraesCS5B02G380600/TraesCS5B02G380600	6
MF	GO:0090417	N-methylnicotinate transmembrane transporter activity	TraesCS5B02G380500/TraesCS5B02G380600/TraesCS5B02G380600/TraesCS5B02G380600/TraesCS5B02G380600/TraesCS5B02G380600	6
MF	GO:0015651	quaternary ammonium group transmembrane transporter activity	TraesCS5B02G380500/TraesCS5B02G380600/TraesCS5B02G380600/TraesCS5B02G380600/TraesCS5B02G380600/TraesCS5B02G380600	6
MF	GO:0090482	vitamin transmembrane transporter activity	TraesCS5B02G380500/TraesCS5B02G380600/TraesCS5B02G380600/TraesCS5B02G380600/TraesCS5B02G380600/TraesCS5B02G380600	6
MF	GO:0008519	ammonium transmembrane transporter activity	TraesCS5B02G380500/TraesCS5B02G380600/TraesCS5B02G380600/TraesCS5B02G380600/TraesCS5B02G380600/TraesCS5B02G380600	6
MF	GO:0015101	organic cation transmembrane transporter activity	TraesCS5B02G380500/TraesCS5B02G380600/TraesCS5B02G380600/TraesCS5B02G380600/TraesCS5B02G380600/TraesCS5B02G380600	6
MF	GO:0008028	monocarboxylic acid transmembrane transporter activity	TraesCS5B02G380500/TraesCS5B02G380600/TraesCS5B02G380600/TraesCS5B02G380600/TraesCS5B02G380600/TraesCS5B02G380600	6
MF	GO:0005342	organic acid transmembrane transporter activity	TraesCS5B02G380500/TraesCS5B02G380600/TraesCS5B02G380600/TraesCS5B02G380600/TraesCS5B02G380600/TraesCS5B02G380600	6
MF	GO:0046943	carboxylic acid transmembrane transporter activity	TraesCS5B02G380500/TraesCS5B02G380600/TraesCS5B02G380600/TraesCS5B02G380600/TraesCS5B02G380600/TraesCS5B02G380600	6
MF	GO:0005199	structural constituent of cell wall	TraesCS5B02G380800	1
MF	GO:0001882	nucleoside binding	TraesCS5B02G381300	1
MF	GO:0001883	purine nucleoside binding	TraesCS5B02G381300	1
MF	GO:0005525	GTP binding	TraesCS5B02G381300	1
MF	GO:0019001	guanyl nucleotide binding	TraesCS5B02G381300	1
MF	GO:0032549	ribonucleoside binding	TraesCS5B02G381300	1
MF	GO:0032550	purine ribonucleoside binding	TraesCS5B02G381300	1
MF	GO:0032561	guanyl ribonucleotide binding	TraesCS5B02G381300	1
MF	GO:0009977	proton motive force dependent protein transmembrane transporter activity	TraesCS5B02G381600	1
MF	GO:0015450	P-P-bond-hydrolysis-driven protein transmembrane transporter activity	TraesCS5B02G381600	1
MF	GO:0008320	protein transmembrane transporter activity	TraesCS5B02G381600	1
MF	GO:0022884	macromolecule transmembrane transporter activity	TraesCS5B02G381600	1
MF	GO:0140318	protein transporter activity	TraesCS5B02G381600	1
MF	GO:1904680	peptide transmembrane transporter activity	TraesCS5B02G381600	1
MF	GO:0042887	amide transmembrane transporter activity	TraesCS5B02G381600	1
MF	GO:0003697	single-stranded DNA binding	TraesCS5B02G381700/TraesCS5B02G392800	2
MF	GO:0016702	oxidoreductase activity	TraesCS5B02G382300/TraesCS5B02G382400/TraesCS5B02G382600	3
MF	GO:0016701	oxidoreductase activity	TraesCS5B02G382300/TraesCS5B02G382400/TraesCS5B02G382600	3
MF	GO:0016165	linoleate 13S-lipoxygenase activity	TraesCS5B02G382300/TraesCS5B02G382400/TraesCS5B02G382600	3
MF	GO:0051213	dioxygenase activity	TraesCS5B02G382300/TraesCS5B02G382400/TraesCS5B02G382600	3
MF	GO:0016905	myosin heavy chain kinase activity	TraesCS5B02G382700	1
MF	GO:0045159	myosin II binding	TraesCS5B02G382700	1
MF	GO:0017022	myosin binding	TraesCS5B02G382700	1
MF	GO:0004683	calmodulin-dependent protein kinase activity	TraesCS5B02G382700	1
MF	GO:0016765	transferase activity	TraesCS5B02G383700/TraesCS5B02G383900/TraesCS5B02G383900	3
MF	GO:0034038	deoxyhypusine synthase activity	TraesCS5B02G383700/TraesCS5B02G383900/TraesCS5B02G383900	3
MF	GO:0030674	protein-macromolecule adaptor activity	TraesCS5B02G384200/TraesCS5B02G384200/TraesCS5B02G384200	3
MF	GO:0060090	molecular adaptor activity	TraesCS5B02G384200/TraesCS5B02G384200/TraesCS5B02G384200	3
MF	GO:0016709	oxidoreductase activity	TraesCS5B02G386000	1
MF	GO:0009540	zeaxanthin epoxidase [overall] activity	TraesCS5B02G386000	1
MF	GO:0052662	zeaxanthin epoxidase activity	TraesCS5B02G386000	1
MF	GO:0015095	magnesium ion transmembrane transporter activity	TraesCS5B02G386300	1
MF	GO:0034458	3'-5' RNA helicase activity	TraesCS5B02G389300	1
MF	GO:0003678	DNA helicase activity	TraesCS5B02G389300	1
MF	GO:0003725	double-stranded RNA binding	TraesCS5B02G389300/TraesCS5B02G392800	2
MF	GO:0008186	RNA-dependent ATPase activity	TraesCS5B02G389300/TraesCS5B02G392800	2
MF	GO:0003724	RNA helicase activity	TraesCS5B02G389300/TraesCS5B02G392800	2
MF	GO:0008094	DNA-dependent ATPase activity	TraesCS5B02G389300/TraesCS5B02G392800/TraesCS5B02G396300	3
MF	GO:0070615	nucleosome-dependent ATPase activity	TraesCS5B02G391200	1
MF	GO:0031491	nucleosome binding	TraesCS5B02G391200	1
MF	GO:0071889	14-3-3 protein binding	TraesCS5B02G391400/TraesCS5B02G391400	2
MF	GO:0000146	microfilament motor activity	TraesCS5B02G391400/TraesCS5B02G391400	2
MF	GO:0030898	actin-dependent ATPase activity	TraesCS5B02G391400/TraesCS5B02G391400	2
MF	GO:0051015	actin filament binding	TraesCS5B02G391400/TraesCS5B02G391400	2
MF	GO:0003779	actin binding	TraesCS5B02G391400/TraesCS5B02G391400	2
MF	GO:0003774	motor activity	TraesCS5B02G391400/TraesCS5B02G391400/TraesCS5B02G395000/TraesCS5B02G400900	4
MF	GO:0035064	methylated histone binding	TraesCS5B02G391700	1
MF	GO:0140034	methylation-dependent protein binding	TraesCS5B02G391700	1
MF	GO:0140030	modification-dependent protein binding	TraesCS5B02G391700	1
MF	GO:0042393	histone binding	TraesCS5B02G391700	1
MF	GO:0070569	uridylyltransferase activity	TraesCS5B02G392200	1
MF	GO:0016779	nucleotidyltransferase activity	TraesCS5B02G392200	1
MF	GO:0016655	oxidoreductase activity	TraesCS5B02G392300	1
MF	GO:0003955	NAD(P)H dehydrogenase (quinone) activity	TraesCS5B02G392300	1
MF	GO:0010181	FMN binding	TraesCS5B02G392300	1
MF	GO:0016651	oxidoreductase activity	TraesCS5B02G392300/TraesCS5B02G392600/TraesCS5B02G408100	3
MF	GO:0003954	NADH dehydrogenase activity	TraesCS5B02G392600	1
MF	GO:0051536	iron-sulfur cluster binding	TraesCS5B02G392600	1
MF	GO:0051540	metal cluster binding	TraesCS5B02G392600	1
MF	GO:0002151	G-quadruplex RNA binding	TraesCS5B02G392800	1
MF	GO:0051880	G-quadruplex DNA binding	TraesCS5B02G392800	1
MF	GO:0070034	telomerase RNA binding	TraesCS5B02G392800	1
MF	GO:0042826	histone deacetylase binding	TraesCS5B02G392800	1
MF	GO:0000978	RNA polymerase II cis-regulatory region sequence-specific DNA binding	TraesCS5B02G392800	1
MF	GO:0000987	cis-regulatory region sequence-specific DNA binding	TraesCS5B02G392800	1
MF	GO:0000977	RNA polymerase II transcription regulatory region sequence-specific DNA binding	TraesCS5B02G392800	1
MF	GO:0000976	transcription regulatory region sequence-specific DNA binding	TraesCS5B02G392800	1
MF	GO:0008422	beta-glucosidase activity	TraesCS5B02G393300/TraesCS5B02G393300/TraesCS5B02G393700/TraesCS5B02G393800/TraesCS5B02G393900/TraesCS5B02G394000/TraesCS5B02G400200	7
MF	GO:0015926	glucosidase activity	TraesCS5B02G393300/TraesCS5B02G393300/TraesCS5B02G393700/TraesCS5B02G393800/TraesCS5B02G393900/TraesCS5B02G394000/TraesCS5B02G400200	7
MF	GO:0016208	AMP binding	TraesCS5B02G394600/TraesCS5B02G394600/TraesCS5B02G394600/TraesCS5B02G394700	4
MF	GO:0003777	microtubule motor activity	TraesCS5B02G395000/TraesCS5B02G400900	2
MF	GO:0003713	transcription coactivator activity	TraesCS5B02G395200	1
MF	GO:0003712	transcription coregulator activity	TraesCS5B02G395200	1
MF	GO:0030247	polysaccharide binding	TraesCS5B02G395500	1
MF	GO:0030246	carbohydrate binding	TraesCS5B02G395500/TraesCS5B02G409900	2
MF	GO:0046915	transition metal ion transmembrane transporter activity	TraesCS5B02G395800	1
MF	GO:0016894	endonuclease activity	TraesCS5B02G396300	1
MF	GO:0003918	DNA topoisomerase type II (double strand cut	TraesCS5B02G396300	1
MF	GO:0016889	endodeoxyribonuclease activity	TraesCS5B02G396300	1
MF	GO:0003916	DNA topoisomerase activity	TraesCS5B02G396300	1
MF	GO:0004520	endodeoxyribonuclease activity	TraesCS5B02G396300	1
MF	GO:0004536	deoxyribonuclease activity	TraesCS5B02G396300	1
MF	GO:0022840	leak channel activity	TraesCS5B02G396400	1
MF	GO:0022841	potassium ion leak channel activity	TraesCS5B02G396400	1
MF	GO:0022842	narrow pore channel activity	TraesCS5B02G396400	1
MF	GO:0004788	thiamine diphosphokinase activity	TraesCS5B02G396400	1
MF	GO:0016778	diphosphotransferase activity	TraesCS5B02G396400	1
MF	GO:0005242	inward rectifier potassium channel activity	TraesCS5B02G396400/TraesCS5B02G400100/TraesCS5B02G400100	3
MF	GO:0099094	ligand-gated cation channel activity	TraesCS5B02G396400/TraesCS5B02G400100/TraesCS5B02G400100	3
MF	GO:0015276	ligand-gated ion channel activity	TraesCS5B02G396400/TraesCS5B02G400100/TraesCS5B02G400100	3
MF	GO:0022834	ligand-gated channel activity	TraesCS5B02G396400/TraesCS5B02G400100/TraesCS5B02G400100	3
MF	GO:0005249	voltage-gated potassium channel activity	TraesCS5B02G396400/TraesCS5B02G400100/TraesCS5B02G400100	3
MF	GO:0022843	voltage-gated cation channel activity	TraesCS5B02G396400/TraesCS5B02G400100/TraesCS5B02G400100	3
MF	GO:0005267	potassium channel activity	TraesCS5B02G396400/TraesCS5B02G400100/TraesCS5B02G400100	3
MF	GO:0005244	voltage-gated ion channel activity	TraesCS5B02G396400/TraesCS5B02G400100/TraesCS5B02G400100	3
MF	GO:0022832	voltage-gated channel activity	TraesCS5B02G396400/TraesCS5B02G400100/TraesCS5B02G400100	3
MF	GO:0022839	ion gated channel activity	TraesCS5B02G396400/TraesCS5B02G400100/TraesCS5B02G400100	3
MF	GO:0022836	gated channel activity	TraesCS5B02G396400/TraesCS5B02G400100/TraesCS5B02G400100	3
MF	GO:0005261	cation channel activity	TraesCS5B02G396400/TraesCS5B02G400100/TraesCS5B02G400100	3
MF	GO:0015079	potassium ion transmembrane transporter activity	TraesCS5B02G396400/TraesCS5B02G400100/TraesCS5B02G400100	3
MF	GO:0005216	ion channel activity	TraesCS5B02G396400/TraesCS5B02G400100/TraesCS5B02G400100	3
MF	GO:0015267	channel activity	TraesCS5B02G396400/TraesCS5B02G400100/TraesCS5B02G400100	3
MF	GO:0022803	passive transmembrane transporter activity	TraesCS5B02G396400/TraesCS5B02G400100/TraesCS5B02G400100	3
MF	GO:0046982	protein heterodimerization activity	TraesCS5B02G396600/TraesCS5B02G396600	2
MF	GO:0017048	Rho GTPase binding	TraesCS5B02G397300	1
MF	GO:0017016	Ras GTPase binding	TraesCS5B02G397300	1
MF	GO:0031267	small GTPase binding	TraesCS5B02G397300	1
MF	GO:0051020	GTPase binding	TraesCS5B02G397300	1
MF	GO:0015083	aluminum ion transmembrane transporter activity	TraesCS5B02G397500/TraesCS5B02G397600/TraesCS5B02G397600	3
MF	GO:0052689	carboxylic ester hydrolase activity	TraesCS5B02G399000/TraesCS5B02G403800	2
MF	GO:0016616	oxidoreductase activity	TraesCS5B02G399800	1
MF	GO:0016614	oxidoreductase activity	TraesCS5B02G399800	1
MF	GO:0003979	UDP-glucose 6-dehydrogenase activity	TraesCS5B02G399800	1
MF	GO:0008184	glycogen phosphorylase activity	TraesCS5B02G400000/TraesCS5B02G400000	2
MF	GO:0030170	pyridoxal phosphate binding	TraesCS5B02G400000/TraesCS5B02G400000	2
MF	GO:0070279	vitamin B6 binding	TraesCS5B02G400000/TraesCS5B02G400000	2
MF	GO:0019842	vitamin binding	TraesCS5B02G400000/TraesCS5B02G400000	2
MF	GO:0004645	4-alpha-oligoglucan phosphorylase activity	TraesCS5B02G400000/TraesCS5B02G400000	2
MF	GO:0005217	intracellular ligand-gated ion channel activity	TraesCS5B02G400100/TraesCS5B02G400100	2
MF	GO:0005221	intracellular cyclic nucleotide activated cation channel activity	TraesCS5B02G400100/TraesCS5B02G400100	2
MF	GO:0043855	cyclic nucleotide-gated ion channel activity	TraesCS5B02G400100/TraesCS5B02G400100	2
MF	GO:0005262	calcium channel activity	TraesCS5B02G400100/TraesCS5B02G400100	2
MF	GO:0015085	calcium ion transmembrane transporter activity	TraesCS5B02G400100/TraesCS5B02G400100	2
MF	GO:0072509	divalent inorganic cation transmembrane transporter activity	TraesCS5B02G400100/TraesCS5B02G400100	2
MF	GO:0043515	kinetochore binding	TraesCS5B02G400900	1
MF	GO:0004712	protein serine/threonine/tyrosine kinase activity	TraesCS5B02G401200/TraesCS5B02G401200/TraesCS5B02G403300/TraesCS5B02G403300	4
MF	GO:0043130	ubiquitin binding	TraesCS5B02G401600	1
MF	GO:0032182	ubiquitin-like protein binding	TraesCS5B02G401600	1
MF	GO:0003688	DNA replication origin binding	TraesCS5B02G402000	1
MF	GO:0050525	cutinase activity	TraesCS5B02G403800	1
MF	GO:0016273	arginine N-methyltransferase activity	TraesCS5B02G404100/TraesCS5B02G404100	2
MF	GO:0016274	protein-arginine N-methyltransferase activity	TraesCS5B02G404100/TraesCS5B02G404100	2
MF	GO:0008170	N-methyltransferase activity	TraesCS5B02G404100/TraesCS5B02G404100	2
MF	GO:0008276	protein methyltransferase activity	TraesCS5B02G404100/TraesCS5B02G404100	2
MF	GO:0016684	oxidoreductase activity	TraesCS5B02G404200/TraesCS5B02G404300	2
MF	GO:0004601	peroxidase activity	TraesCS5B02G404200/TraesCS5B02G404300	2
MF	GO:0016209	antioxidant activity	TraesCS5B02G404200/TraesCS5B02G404300/TraesCS5B02G408100	3
MF	GO:0008080	N-acetyltransferase activity	TraesCS5B02G405900	1
MF	GO:0016410	N-acyltransferase activity	TraesCS5B02G405900	1
MF	GO:0016407	acetyltransferase activity	TraesCS5B02G405900	1
MF	GO:0000156	phosphorelay response regulator activity	TraesCS5B02G406300/TraesCS5B02G406300	2
MF	GO:0035174	histone serine kinase activity	TraesCS5B02G406600	1
MF	GO:0035175	histone kinase activity (H3-S10 specific)	TraesCS5B02G406600	1
MF	GO:0044022	histone kinase activity (H3-S28 specific)	TraesCS5B02G406600	1
MF	GO:0035173	histone kinase activity	TraesCS5B02G406600	1
MF	GO:0008139	nuclear localization sequence binding	TraesCS5B02G406900	1
MF	GO:0005048	signal sequence binding	TraesCS5B02G406900	1
MF	GO:0042277	peptide binding	TraesCS5B02G406900	1
MF	GO:0033218	amide binding	TraesCS5B02G406900	1
MF	GO:0019825	oxygen binding	TraesCS5B02G408000	1
MF	GO:0016836	hydro-lyase activity	TraesCS5B02G408000	1
MF	GO:0016835	carbon-oxygen lyase activity	TraesCS5B02G408000	1
MF	GO:0016671	oxidoreductase activity	TraesCS5B02G408100	1
MF	GO:0016668	oxidoreductase activity	TraesCS5B02G408100	1
MF	GO:0016667	oxidoreductase activity	TraesCS5B02G408100	1
MF	GO:0047134	protein-disulfide reductase activity	TraesCS5B02G408100	1
MF	GO:0015035	protein disulfide oxidoreductase activity	TraesCS5B02G408100	1
MF	GO:0004791	thioredoxin-disulfide reductase activity	TraesCS5B02G408100	1
MF	GO:0015036	disulfide oxidoreductase activity	TraesCS5B02G408100	1
MF	GO:0004568	chitinase activity	TraesCS5B02G410300	1

## Sheet: Appendix E
Appendix E: Functional annotation and enrichment of Cd content QTL on Chromosome 7BL
ONTOLOGY	ID	Description	geneID	Count
BP	GO:0009765	photosynthesis	TraesCS7B02G313800	1
BP	GO:0010206	photosystem II repair	TraesCS7B02G313800	1
BP	GO:0030091	protein repair	TraesCS7B02G313800	1
BP	GO:0019684	photosynthesis	TraesCS7B02G313800/TraesCS7B02G329500	2
BP	GO:0034406	cell wall beta-glucan metabolic process	TraesCS7B02G314000	1
BP	GO:0052541	plant-type cell wall cellulose metabolic process	TraesCS7B02G314000	1
BP	GO:0030243	cellulose metabolic process	TraesCS7B02G314000	1
BP	GO:0006665	sphingolipid metabolic process	TraesCS7B02G314000	1
BP	GO:0051273	beta-glucan metabolic process	TraesCS7B02G314000	1
BP	GO:0006643	membrane lipid metabolic process	TraesCS7B02G314000	1
BP	GO:0010087	phloem or xylem histogenesis	TraesCS7B02G314000/TraesCS7B02G315800	2
BP	GO:0010383	cell wall polysaccharide metabolic process	TraesCS7B02G314000/TraesCS7B02G340100/TraesCS7B02G341900/TraesCS7B02G343300/TraesCS7B02G343300	5
BP	GO:0044036	cell wall macromolecule metabolic process	TraesCS7B02G314000/TraesCS7B02G340100/TraesCS7B02G341900/TraesCS7B02G343300/TraesCS7B02G343300	5
BP	GO:0052546	cell wall pectin metabolic process	TraesCS7B02G314000/TraesCS7B02G343300/TraesCS7B02G343300	3
BP	GO:0045488	pectin metabolic process	TraesCS7B02G314000/TraesCS7B02G343300/TraesCS7B02G343300	3
BP	GO:0010393	galacturonan metabolic process	TraesCS7B02G314000/TraesCS7B02G343300/TraesCS7B02G343300	3
BP	GO:0090506	axillary shoot meristem initiation	TraesCS7B02G314200	1
BP	GO:0010014	meristem initiation	TraesCS7B02G314200	1
BP	GO:0009933	meristem structural organization	TraesCS7B02G314200	1
BP	GO:0048532	anatomical structure arrangement	TraesCS7B02G314200	1
BP	GO:0001763	morphogenesis of a branching structure	TraesCS7B02G314200/TraesCS7B02G319100	2
BP	GO:0010223	secondary shoot formation	TraesCS7B02G314200/TraesCS7B02G319100	2
BP	GO:0010346	shoot axis formation	TraesCS7B02G314200/TraesCS7B02G319100	2
BP	GO:0016573	histone acetylation	TraesCS7B02G314400/TraesCS7B02G314400	2
BP	GO:0006475	internal protein amino acid acetylation	TraesCS7B02G314400/TraesCS7B02G314400	2
BP	GO:0018393	internal peptidyl-lysine acetylation	TraesCS7B02G314400/TraesCS7B02G314400	2
BP	GO:0018394	peptidyl-lysine acetylation	TraesCS7B02G314400/TraesCS7B02G314400	2
BP	GO:0006473	protein acetylation	TraesCS7B02G314400/TraesCS7B02G314400	2
BP	GO:0043543	protein acylation	TraesCS7B02G314400/TraesCS7B02G314400	2
BP	GO:0006273	lagging strand elongation	TraesCS7B02G314600/TraesCS7B02G314600	2
BP	GO:0051103	DNA ligation involved in DNA repair	TraesCS7B02G314600/TraesCS7B02G314600	2
BP	GO:0006266	DNA ligation	TraesCS7B02G314600/TraesCS7B02G314600	2
BP	GO:0006271	DNA strand elongation involved in DNA replication	TraesCS7B02G314600/TraesCS7B02G314600	2
BP	GO:0022616	DNA strand elongation	TraesCS7B02G314600/TraesCS7B02G314600	2
BP	GO:0006303	double-strand break repair via nonhomologous end joining	TraesCS7B02G314600/TraesCS7B02G314600	2
BP	GO:0000726	non-recombinational repair	TraesCS7B02G314600/TraesCS7B02G314600	2
BP	GO:0006783	heme biosynthetic process	TraesCS7B02G314800	1
BP	GO:0042168	heme metabolic process	TraesCS7B02G314800	1
BP	GO:0006779	porphyrin-containing compound biosynthetic process	TraesCS7B02G314800	1
BP	GO:0033014	tetrapyrrole biosynthetic process	TraesCS7B02G314800	1
BP	GO:0006778	porphyrin-containing compound metabolic process	TraesCS7B02G314800	1
BP	GO:0033013	tetrapyrrole metabolic process	TraesCS7B02G314800	1
BP	GO:0010054	trichoblast differentiation	TraesCS7B02G314900	1
BP	GO:0018196	peptidyl-asparagine modification	TraesCS7B02G315600	1
BP	GO:0018279	protein N-linked glycosylation via asparagine	TraesCS7B02G315600	1
BP	GO:0006487	protein N-linked glycosylation	TraesCS7B02G315600	1
BP	GO:0006486	protein glycosylation	TraesCS7B02G315600	1
BP	GO:0043413	macromolecule glycosylation	TraesCS7B02G315600	1
BP	GO:0009101	glycoprotein biosynthetic process	TraesCS7B02G315600	1
BP	GO:0070085	glycosylation	TraesCS7B02G315600	1
BP	GO:0009100	glycoprotein metabolic process	TraesCS7B02G315600	1
BP	GO:0009231	riboflavin biosynthetic process	TraesCS7B02G315700/TraesCS7B02G315700	2
BP	GO:0006771	riboflavin metabolic process	TraesCS7B02G315700/TraesCS7B02G315700	2
BP	GO:0042727	flavin-containing compound biosynthetic process	TraesCS7B02G315700/TraesCS7B02G315700	2
BP	GO:0042726	flavin-containing compound metabolic process	TraesCS7B02G315700/TraesCS7B02G315700	2
BP	GO:0042364	water-soluble vitamin biosynthetic process	TraesCS7B02G315700/TraesCS7B02G315700/TraesCS7B02G321800/TraesCS7B02G322500/TraesCS7B02G322500/TraesCS7B02G322500/TraesCS7B02G322500/TraesCS7B02G322500/TraesCS7B02G322500	9
BP	GO:0006767	water-soluble vitamin metabolic process	TraesCS7B02G315700/TraesCS7B02G315700/TraesCS7B02G321800/TraesCS7B02G322500/TraesCS7B02G322500/TraesCS7B02G322500/TraesCS7B02G322500/TraesCS7B02G322500/TraesCS7B02G322500	9
BP	GO:0009110	vitamin biosynthetic process	TraesCS7B02G315700/TraesCS7B02G315700/TraesCS7B02G321800/TraesCS7B02G322500/TraesCS7B02G322500/TraesCS7B02G322500/TraesCS7B02G322500/TraesCS7B02G322500/TraesCS7B02G322500	9
BP	GO:0006766	vitamin metabolic process	TraesCS7B02G315700/TraesCS7B02G315700/TraesCS7B02G321800/TraesCS7B02G322500/TraesCS7B02G322500/TraesCS7B02G322500/TraesCS7B02G322500/TraesCS7B02G322500/TraesCS7B02G322500	9
BP	GO:0010088	phloem development	TraesCS7B02G315800	1
BP	GO:0010089	xylem development	TraesCS7B02G315800	1
BP	GO:0043574	peroxisomal transport	TraesCS7B02G316200	1
BP	GO:0046835	carbohydrate phosphorylation	TraesCS7B02G317000/TraesCS7B02G317000/TraesCS7B02G317000	3
BP	GO:0035725	sodium ion transmembrane transport	TraesCS7B02G318800	1
BP	GO:0006814	sodium ion transport	TraesCS7B02G318800	1
BP	GO:0015969	guanosine tetraphosphate metabolic process	TraesCS7B02G318900	1
BP	GO:0034035	purine ribonucleoside bisphosphate metabolic process	TraesCS7B02G318900	1
BP	GO:1901070	guanosine-containing compound biosynthetic process	TraesCS7B02G318900	1
BP	GO:0042451	purine nucleoside biosynthetic process	TraesCS7B02G318900	1
BP	GO:0046129	purine ribonucleoside biosynthetic process	TraesCS7B02G318900	1
BP	GO:1901068	guanosine-containing compound metabolic process	TraesCS7B02G318900	1
BP	GO:0046128	purine ribonucleoside metabolic process	TraesCS7B02G318900	1
BP	GO:0033866	nucleoside bisphosphate biosynthetic process	TraesCS7B02G318900	1
BP	GO:0034030	ribonucleoside bisphosphate biosynthetic process	TraesCS7B02G318900	1
BP	GO:0034033	purine nucleoside bisphosphate biosynthetic process	TraesCS7B02G318900	1
BP	GO:0042278	purine nucleoside metabolic process	TraesCS7B02G318900	1
BP	GO:0042455	ribonucleoside biosynthetic process	TraesCS7B02G318900	1
BP	GO:0009163	nucleoside biosynthetic process	TraesCS7B02G318900	1
BP	GO:0009119	ribonucleoside metabolic process	TraesCS7B02G318900	1
BP	GO:0009116	nucleoside metabolic process	TraesCS7B02G318900	1
BP	GO:0033865	nucleoside bisphosphate metabolic process	TraesCS7B02G318900	1
BP	GO:0033875	ribonucleoside bisphosphate metabolic process	TraesCS7B02G318900	1
BP	GO:0034032	purine nucleoside bisphosphate metabolic process	TraesCS7B02G318900	1
BP	GO:1901659	glycosyl compound biosynthetic process	TraesCS7B02G318900	1
BP	GO:0034404	nucleobase-containing small molecule biosynthetic process	TraesCS7B02G318900	1
BP	GO:0006164	purine nucleotide biosynthetic process	TraesCS7B02G318900	1
BP	GO:0009152	purine ribonucleotide biosynthetic process	TraesCS7B02G318900	1
BP	GO:0072522	purine-containing compound biosynthetic process	TraesCS7B02G318900	1
BP	GO:0009260	ribonucleotide biosynthetic process	TraesCS7B02G318900	1
BP	GO:0046390	ribose phosphate biosynthetic process	TraesCS7B02G318900	1
BP	GO:1901600	strigolactone metabolic process	TraesCS7B02G319100	1
BP	GO:1901601	strigolactone biosynthetic process	TraesCS7B02G319100	1
BP	GO:1901334	lactone metabolic process	TraesCS7B02G319100	1
BP	GO:1901336	lactone biosynthetic process	TraesCS7B02G319100	1
BP	GO:0016106	sesquiterpenoid biosynthetic process	TraesCS7B02G319100	1
BP	GO:0006714	sesquiterpenoid metabolic process	TraesCS7B02G319100	1
BP	GO:0035822	gene conversion	TraesCS7B02G319400/TraesCS7B02G335900/TraesCS7B02G335900	3
BP	GO:0032042	mitochondrial DNA metabolic process	TraesCS7B02G319400/TraesCS7B02G335900/TraesCS7B02G335900	3
BP	GO:0070987	error-free translesion synthesis	TraesCS7B02G319400/TraesCS7B02G335900/TraesCS7B02G335900	3
BP	GO:0002200	somatic diversification of immune receptors	TraesCS7B02G319400/TraesCS7B02G335900/TraesCS7B02G335900	3
BP	GO:0016445	somatic diversification of immunoglobulins	TraesCS7B02G319400/TraesCS7B02G335900/TraesCS7B02G335900	3
BP	GO:0002377	immunoglobulin production	TraesCS7B02G319400/TraesCS7B02G335900/TraesCS7B02G335900	3
BP	GO:0002440	production of molecular mediator of immune response	TraesCS7B02G319400/TraesCS7B02G335900/TraesCS7B02G335900	3
BP	GO:0042276	error-prone translesion synthesis	TraesCS7B02G319400/TraesCS7B02G335900/TraesCS7B02G335900	3
BP	GO:0000002	mitochondrial genome maintenance	TraesCS7B02G319400/TraesCS7B02G335900/TraesCS7B02G335900	3
BP	GO:0016444	somatic cell DNA recombination	TraesCS7B02G319400/TraesCS7B02G335900/TraesCS7B02G335900	3
BP	GO:0019985	translesion synthesis	TraesCS7B02G319400/TraesCS7B02G335900/TraesCS7B02G335900	3
BP	GO:0000731	DNA synthesis involved in DNA repair	TraesCS7B02G319400/TraesCS7B02G335900/TraesCS7B02G335900	3
BP	GO:0006301	postreplication repair	TraesCS7B02G319400/TraesCS7B02G335900/TraesCS7B02G335900	3
BP	GO:0002520	immune system development	TraesCS7B02G319400/TraesCS7B02G335900/TraesCS7B02G335900	3
BP	GO:0071897	DNA biosynthetic process	TraesCS7B02G319400/TraesCS7B02G335900/TraesCS7B02G335900	3
BP	GO:0010224	response to UV-B	TraesCS7B02G319400/TraesCS7B02G335900/TraesCS7B02G335900	3
BP	GO:0046398	UDP-glucuronate metabolic process	TraesCS7B02G319900/TraesCS7B02G319900	2
BP	GO:0006011	UDP-glucose metabolic process	TraesCS7B02G319900/TraesCS7B02G319900	2
BP	GO:0033356	UDP-L-arabinose metabolic process	TraesCS7B02G319900/TraesCS7B02G319900	2
BP	GO:0009226	nucleotide-sugar biosynthetic process	TraesCS7B02G319900/TraesCS7B02G319900	2
BP	GO:0009225	nucleotide-sugar metabolic process	TraesCS7B02G319900/TraesCS7B02G319900	2
BP	GO:0032025	response to cobalt ion	TraesCS7B02G320100/TraesCS7B02G320100/TraesCS7B02G320100/TraesCS7B02G320100/TraesCS7B02G320900	5
BP	GO:0071585	detoxification of cadmium ion	TraesCS7B02G320100/TraesCS7B02G320100/TraesCS7B02G320100/TraesCS7B02G320100/TraesCS7B02G320900	5
BP	GO:1990170	stress response to cadmium ion	TraesCS7B02G320100/TraesCS7B02G320100/TraesCS7B02G320100/TraesCS7B02G320100/TraesCS7B02G320900	5
BP	GO:0061687	detoxification of inorganic compound	TraesCS7B02G320100/TraesCS7B02G320100/TraesCS7B02G320100/TraesCS7B02G320100/TraesCS7B02G320900	5
BP	GO:0015691	cadmium ion transport	TraesCS7B02G320100/TraesCS7B02G320100/TraesCS7B02G320100/TraesCS7B02G320100/TraesCS7B02G320900	5
BP	GO:0097501	stress response to metal ion	TraesCS7B02G320100/TraesCS7B02G320100/TraesCS7B02G320100/TraesCS7B02G320100/TraesCS7B02G320900	5
BP	GO:0010043	response to zinc ion	TraesCS7B02G320100/TraesCS7B02G320100/TraesCS7B02G320100/TraesCS7B02G320100/TraesCS7B02G320900/TraesCS7B02G321200/TraesCS7B02G321200/TraesCS7B02G321300	8
BP	GO:0006829	zinc ion transport	TraesCS7B02G320100/TraesCS7B02G320100/TraesCS7B02G320100/TraesCS7B02G320100/TraesCS7B02G320900/TraesCS7B02G321200/TraesCS7B02G321200/TraesCS7B02G337700/TraesCS7B02G337700	9
BP	GO:0000041	transition metal ion transport	TraesCS7B02G320100/TraesCS7B02G320100/TraesCS7B02G320100/TraesCS7B02G320100/TraesCS7B02G320900/TraesCS7B02G321200/TraesCS7B02G321200/TraesCS7B02G337700/TraesCS7B02G337700	9
BP	GO:0070838	divalent metal ion transport	TraesCS7B02G320100/TraesCS7B02G320100/TraesCS7B02G320100/TraesCS7B02G320100/TraesCS7B02G320900/TraesCS7B02G321200/TraesCS7B02G321200/TraesCS7B02G337700/TraesCS7B02G337700	9
BP	GO:0072511	divalent inorganic cation transport	TraesCS7B02G320100/TraesCS7B02G320100/TraesCS7B02G320100/TraesCS7B02G320100/TraesCS7B02G320900/TraesCS7B02G321200/TraesCS7B02G321200/TraesCS7B02G337700/TraesCS7B02G337700	9
BP	GO:0055076	transition metal ion homeostasis	TraesCS7B02G320100/TraesCS7B02G320100/TraesCS7B02G320100/TraesCS7B02G320100/TraesCS7B02G320900/TraesCS7B02G321400/TraesCS7B02G337700/TraesCS7B02G337700	8
BP	GO:0055069	zinc ion homeostasis	TraesCS7B02G320100/TraesCS7B02G320100/TraesCS7B02G320100/TraesCS7B02G320100/TraesCS7B02G320900/TraesCS7B02G337700/TraesCS7B02G337700	7
BP	GO:0072507	divalent inorganic cation homeostasis	TraesCS7B02G320100/TraesCS7B02G320100/TraesCS7B02G320100/TraesCS7B02G320100/TraesCS7B02G320900/TraesCS7B02G337700/TraesCS7B02G337700	7
BP	GO:0000413	protein peptidyl-prolyl isomerization	TraesCS7B02G320200	1
BP	GO:0018208	peptidyl-proline modification	TraesCS7B02G320200	1
BP	GO:0061077	chaperone-mediated protein folding	TraesCS7B02G320200	1
BP	GO:0006457	protein folding	TraesCS7B02G320200	1
BP	GO:0034755	iron ion transmembrane transport	TraesCS7B02G321200/TraesCS7B02G321200	2
BP	GO:0006826	iron ion transport	TraesCS7B02G321200/TraesCS7B02G321200	2
BP	GO:0009624	response to nematode	TraesCS7B02G321200/TraesCS7B02G321200	2
BP	GO:0071577	zinc ion transmembrane transport	TraesCS7B02G321200/TraesCS7B02G321200/TraesCS7B02G337700/TraesCS7B02G337700	4
BP	GO:0010106	cellular response to iron ion starvation	TraesCS7B02G321400	1
BP	GO:0006879	cellular iron ion homeostasis	TraesCS7B02G321400	1
BP	GO:0055072	iron ion homeostasis	TraesCS7B02G321400	1
BP	GO:0046916	cellular transition metal ion homeostasis	TraesCS7B02G321400/TraesCS7B02G337700/TraesCS7B02G337700	3
BP	GO:0006875	cellular metal ion homeostasis	TraesCS7B02G321400/TraesCS7B02G337700/TraesCS7B02G337700	3
BP	GO:0019853	L-ascorbic acid biosynthetic process	TraesCS7B02G321800	1
BP	GO:0019852	L-ascorbic acid metabolic process	TraesCS7B02G321800	1
BP	GO:0046364	monosaccharide biosynthetic process	TraesCS7B02G321800	1
BP	GO:0005996	monosaccharide metabolic process	TraesCS7B02G321800	1
BP	GO:0034517	ribophagy	TraesCS7B02G322100	1
BP	GO:0060628	regulation of ER to Golgi vesicle-mediated transport	TraesCS7B02G322100	1
BP	GO:0035973	aggrephagy	TraesCS7B02G322100	1
BP	GO:0061912	selective autophagy	TraesCS7B02G322100	1
BP	GO:0006888	endoplasmic reticulum to Golgi vesicle-mediated transport	TraesCS7B02G322100	1
BP	GO:0016579	protein deubiquitination	TraesCS7B02G322100	1
BP	GO:0016236	macroautophagy	TraesCS7B02G322100	1
BP	GO:0070646	protein modification by small protein removal	TraesCS7B02G322100	1
BP	GO:0006914	autophagy	TraesCS7B02G322100	1
BP	GO:0061919	process utilizing autophagic mechanism	TraesCS7B02G322100	1
BP	GO:0048193	Golgi vesicle transport	TraesCS7B02G322100	1
BP	GO:0032386	regulation of intracellular transport	TraesCS7B02G322100/TraesCS7B02G340200/TraesCS7B02G340200	3
BP	GO:0060627	regulation of vesicle-mediated transport	TraesCS7B02G322100/TraesCS7B02G340200/TraesCS7B02G340200	3
BP	GO:0060341	regulation of cellular localization	TraesCS7B02G322100/TraesCS7B02G340200/TraesCS7B02G340200	3
BP	GO:0046655	folic acid metabolic process	TraesCS7B02G322500/TraesCS7B02G322500/TraesCS7B02G322500/TraesCS7B02G322500/TraesCS7B02G322500/TraesCS7B02G322500	6
BP	GO:0046656	folic acid biosynthetic process	TraesCS7B02G322500/TraesCS7B02G322500/TraesCS7B02G322500/TraesCS7B02G322500/TraesCS7B02G322500/TraesCS7B02G322500	6
BP	GO:0008153	para-aminobenzoic acid biosynthetic process	TraesCS7B02G322500/TraesCS7B02G322500/TraesCS7B02G322500/TraesCS7B02G322500/TraesCS7B02G322500/TraesCS7B02G322500	6
BP	GO:0046417	chorismate metabolic process	TraesCS7B02G322500/TraesCS7B02G322500/TraesCS7B02G322500/TraesCS7B02G322500/TraesCS7B02G322500/TraesCS7B02G322500	6
BP	GO:0046654	tetrahydrofolate biosynthetic process	TraesCS7B02G322500/TraesCS7B02G322500/TraesCS7B02G322500/TraesCS7B02G322500/TraesCS7B02G322500/TraesCS7B02G322500	6
BP	GO:0046653	tetrahydrofolate metabolic process	TraesCS7B02G322500/TraesCS7B02G322500/TraesCS7B02G322500/TraesCS7B02G322500/TraesCS7B02G322500/TraesCS7B02G322500	6
BP	GO:0046482	para-aminobenzoic acid metabolic process	TraesCS7B02G322500/TraesCS7B02G322500/TraesCS7B02G322500/TraesCS7B02G322500/TraesCS7B02G322500/TraesCS7B02G322500	6
BP	GO:0009396	folic acid-containing compound biosynthetic process	TraesCS7B02G322500/TraesCS7B02G322500/TraesCS7B02G322500/TraesCS7B02G322500/TraesCS7B02G322500/TraesCS7B02G322500	6
BP	GO:0042559	pteridine-containing compound biosynthetic process	TraesCS7B02G322500/TraesCS7B02G322500/TraesCS7B02G322500/TraesCS7B02G322500/TraesCS7B02G322500/TraesCS7B02G322500	6
BP	GO:0043650	dicarboxylic acid biosynthetic process	TraesCS7B02G322500/TraesCS7B02G322500/TraesCS7B02G322500/TraesCS7B02G322500/TraesCS7B02G322500/TraesCS7B02G322500	6
BP	GO:0006760	folic acid-containing compound metabolic process	TraesCS7B02G322500/TraesCS7B02G322500/TraesCS7B02G322500/TraesCS7B02G322500/TraesCS7B02G322500/TraesCS7B02G322500	6
BP	GO:0042558	pteridine-containing compound metabolic process	TraesCS7B02G322500/TraesCS7B02G322500/TraesCS7B02G322500/TraesCS7B02G322500/TraesCS7B02G322500/TraesCS7B02G322500	6
BP	GO:0042398	cellular modified amino acid biosynthetic process	TraesCS7B02G322500/TraesCS7B02G322500/TraesCS7B02G322500/TraesCS7B02G322500/TraesCS7B02G322500/TraesCS7B02G322500	6
BP	GO:0009073	aromatic amino acid family biosynthetic process	TraesCS7B02G322500/TraesCS7B02G322500/TraesCS7B02G322500/TraesCS7B02G322500/TraesCS7B02G322500/TraesCS7B02G322500	6
BP	GO:0043648	dicarboxylic acid metabolic process	TraesCS7B02G322500/TraesCS7B02G322500/TraesCS7B02G322500/TraesCS7B02G322500/TraesCS7B02G322500/TraesCS7B02G322500	6
BP	GO:0006575	cellular modified amino acid metabolic process	TraesCS7B02G322500/TraesCS7B02G322500/TraesCS7B02G322500/TraesCS7B02G322500/TraesCS7B02G322500/TraesCS7B02G322500	6
BP	GO:0042537	benzene-containing compound metabolic process	TraesCS7B02G322500/TraesCS7B02G322500/TraesCS7B02G322500/TraesCS7B02G322500/TraesCS7B02G322500/TraesCS7B02G322500	6
BP	GO:0009072	aromatic amino acid family metabolic process	TraesCS7B02G322500/TraesCS7B02G322500/TraesCS7B02G322500/TraesCS7B02G322500/TraesCS7B02G322500/TraesCS7B02G322500	6
BP	GO:0000165	MAPK cascade	TraesCS7B02G322900	1
BP	GO:0023014	signal transduction by protein phosphorylation	TraesCS7B02G322900	1
BP	GO:0000381	regulation of alternative mRNA splicing	TraesCS7B02G323700/TraesCS7B02G323700	2
BP	GO:0000380	alternative mRNA splicing	TraesCS7B02G323700/TraesCS7B02G323700	2
BP	GO:0048024	regulation of mRNA splicing	TraesCS7B02G323700/TraesCS7B02G323700	2
BP	GO:2000011	regulation of adaxial/abaxial pattern formation	TraesCS7B02G323700/TraesCS7B02G323700	2
BP	GO:0031053	primary miRNA processing	TraesCS7B02G323700/TraesCS7B02G323700	2
BP	GO:0010267	production of ta-siRNAs involved in RNA interference	TraesCS7B02G323700/TraesCS7B02G323700	2
BP	GO:0009955	adaxial/abaxial pattern specification	TraesCS7B02G323700/TraesCS7B02G323700	2
BP	GO:0035196	production of miRNAs involved in gene silencing by miRNA	TraesCS7B02G323700/TraesCS7B02G323700	2
BP	GO:0050684	regulation of mRNA processing	TraesCS7B02G323700/TraesCS7B02G323700	2
BP	GO:0035195	gene silencing by miRNA	TraesCS7B02G323700/TraesCS7B02G323700	2
BP	GO:0030422	production of siRNA involved in RNA interference	TraesCS7B02G323700/TraesCS7B02G323700	2
BP	GO:0043484	regulation of RNA splicing	TraesCS7B02G323700/TraesCS7B02G323700	2
BP	GO:0016246	RNA interference	TraesCS7B02G323700/TraesCS7B02G323700	2
BP	GO:0071359	cellular response to dsRNA	TraesCS7B02G323700/TraesCS7B02G323700	2
BP	GO:0043331	response to dsRNA	TraesCS7B02G323700/TraesCS7B02G323700	2
BP	GO:0031050	dsRNA processing	TraesCS7B02G323700/TraesCS7B02G323700	2
BP	GO:0070918	production of small RNA involved in gene silencing by RNA	TraesCS7B02G323700/TraesCS7B02G323700	2
BP	GO:1903311	regulation of mRNA metabolic process	TraesCS7B02G323700/TraesCS7B02G323700	2
BP	GO:0035194	post-transcriptional gene silencing by RNA	TraesCS7B02G323700/TraesCS7B02G323700	2
BP	GO:0016441	posttranscriptional gene silencing	TraesCS7B02G323700/TraesCS7B02G323700	2
BP	GO:0031047	gene silencing by RNA	TraesCS7B02G323700/TraesCS7B02G323700	2
BP	GO:0003032	detection of oxygen	TraesCS7B02G324400	1
BP	GO:0070483	detection of hypoxia	TraesCS7B02G324400	1
BP	GO:0009593	detection of chemical stimulus	TraesCS7B02G324400	1
BP	GO:0051606	detection of stimulus	TraesCS7B02G324400	1
BP	GO:0001666	response to hypoxia	TraesCS7B02G324400	1
BP	GO:0036293	response to decreased oxygen levels	TraesCS7B02G324400	1
BP	GO:2000280	regulation of root development	TraesCS7B02G324400	1
BP	GO:0070482	response to oxygen levels	TraesCS7B02G324400	1
BP	GO:0018108	peptidyl-tyrosine phosphorylation	TraesCS7B02G324500	1
BP	GO:0018212	peptidyl-tyrosine modification	TraesCS7B02G324500	1
BP	GO:0010152	pollen maturation	TraesCS7B02G325300	1
BP	GO:0009556	microsporogenesis	TraesCS7B02G325300	1
BP	GO:0007030	Golgi organization	TraesCS7B02G325300	1
BP	GO:0010227	floral organ abscission	TraesCS7B02G325300	1
BP	GO:0048236	plant-type sporogenesis	TraesCS7B02G325300	1
BP	GO:0009838	abscission	TraesCS7B02G325300	1
BP	GO:0009742	brassinosteroid mediated signaling pathway	TraesCS7B02G325300	1
BP	GO:0034293	sexual sporulation	TraesCS7B02G325300	1
BP	GO:0071367	cellular response to brassinosteroid stimulus	TraesCS7B02G325300	1
BP	GO:0043934	sporulation	TraesCS7B02G325300	1
BP	GO:0043401	steroid hormone mediated signaling pathway	TraesCS7B02G325300	1
BP	GO:0071383	cellular response to steroid hormone stimulus	TraesCS7B02G325300	1
BP	GO:0010256	endomembrane system organization	TraesCS7B02G325300	1
BP	GO:0048545	response to steroid hormone	TraesCS7B02G325300	1
BP	GO:0009741	response to brassinosteroid	TraesCS7B02G325300	1
BP	GO:0006887	exocytosis	TraesCS7B02G325400	1
BP	GO:0032940	secretion by cell	TraesCS7B02G325400	1
BP	GO:0006470	protein dephosphorylation	TraesCS7B02G326200	1
BP	GO:0010264	myo-inositol hexakisphosphate biosynthetic process	TraesCS7B02G327600	1
BP	GO:0033517	myo-inositol hexakisphosphate metabolic process	TraesCS7B02G327600	1
BP	GO:0032958	inositol phosphate biosynthetic process	TraesCS7B02G327600	1
BP	GO:0046173	polyol biosynthetic process	TraesCS7B02G327600	1
BP	GO:0043647	inositol phosphate metabolic process	TraesCS7B02G327600	1
BP	GO:0010183	pollen tube guidance	TraesCS7B02G327600	1
BP	GO:0050918	positive chemotaxis	TraesCS7B02G327600	1
BP	GO:0019751	polyol metabolic process	TraesCS7B02G327600	1
BP	GO:0009846	pollen germination	TraesCS7B02G327600	1
BP	GO:0006935	chemotaxis	TraesCS7B02G327600	1
BP	GO:0042330	taxis	TraesCS7B02G327600	1
BP	GO:0046165	alcohol biosynthetic process	TraesCS7B02G327600	1
BP	GO:0009860	pollen tube growth	TraesCS7B02G327600	1
BP	GO:0006066	alcohol metabolic process	TraesCS7B02G327600	1
BP	GO:0040011	locomotion	TraesCS7B02G327600	1
BP	GO:0015786	UDP-glucose transmembrane transport	TraesCS7B02G327900	1
BP	GO:0090481	pyrimidine nucleotide-sugar transmembrane transport	TraesCS7B02G327900	1
BP	GO:0015780	nucleotide-sugar transmembrane transport	TraesCS7B02G327900	1
BP	GO:0010044	response to aluminum ion	TraesCS7B02G327900	1
BP	GO:1901264	carbohydrate derivative transport	TraesCS7B02G327900	1
BP	GO:0046621	negative regulation of organ growth	TraesCS7B02G328500	1
BP	GO:0046620	regulation of organ growth	TraesCS7B02G328500	1
BP	GO:0035265	organ growth	TraesCS7B02G328500	1
BP	GO:0048640	negative regulation of developmental growth	TraesCS7B02G328500	1
BP	GO:1900057	positive regulation of leaf senescence	TraesCS7B02G328500	1
BP	GO:1905623	positive regulation of leaf development	TraesCS7B02G328500	1
BP	GO:1900055	regulation of leaf senescence	TraesCS7B02G328500	1
BP	GO:0008285	negative regulation of cell population proliferation	TraesCS7B02G328500	1
BP	GO:0045926	negative regulation of growth	TraesCS7B02G328500	1
BP	GO:2000024	regulation of leaf development	TraesCS7B02G328500	1
BP	GO:0051865	protein autoubiquitination	TraesCS7B02G328500/TraesCS7B02G340500/TraesCS7B02G340600/TraesCS7B02G340700	4
BP	GO:0042127	regulation of cell population proliferation	TraesCS7B02G328500/TraesCS7B02G342500/TraesCS7B02G342500/TraesCS7B02G342500	4
BP	GO:0048564	photosystem I assembly	TraesCS7B02G329500	1
BP	GO:0000463	maturation of LSU-rRNA from tricistronic rRNA transcript (SSU-rRNA	TraesCS7B02G331000	1
BP	GO:0000466	maturation of 5.8S rRNA from tricistronic rRNA transcript (SSU-rRNA	TraesCS7B02G331000	1
BP	GO:0000470	maturation of LSU-rRNA	TraesCS7B02G331000	1
BP	GO:0031167	rRNA methylation	TraesCS7B02G331000	1
BP	GO:0000154	rRNA modification	TraesCS7B02G331000	1
BP	GO:0000460	maturation of 5.8S rRNA	TraesCS7B02G331000	1
BP	GO:0001510	RNA methylation	TraesCS7B02G331000	1
BP	GO:0042273	ribosomal large subunit biogenesis	TraesCS7B02G331000/TraesCS7B02G332300	2
BP	GO:0006269	DNA replication	TraesCS7B02G333100	1
BP	GO:1902295	synthesis of RNA primer involved in cell cycle DNA replication	TraesCS7B02G333100	1
BP	GO:1902318	synthesis of RNA primer involved in nuclear cell cycle DNA replication	TraesCS7B02G333100	1
BP	GO:1902981	synthesis of RNA primer involved in mitotic DNA replication	TraesCS7B02G333100	1
BP	GO:1902969	mitotic DNA replication	TraesCS7B02G333100	1
BP	GO:0033260	nuclear DNA replication	TraesCS7B02G333100	1
BP	GO:0044786	cell cycle DNA replication	TraesCS7B02G333100	1
BP	GO:0045851	pH reduction	TraesCS7B02G335000/TraesCS7B02G335000	2
BP	GO:0006885	regulation of pH	TraesCS7B02G335000/TraesCS7B02G335000	2
BP	GO:0055067	monovalent inorganic cation homeostasis	TraesCS7B02G335000/TraesCS7B02G335000	2
BP	GO:0009694	jasmonic acid metabolic process	TraesCS7B02G335500/TraesCS7B02G335500	2
BP	GO:0010112	regulation of systemic acquired resistance	TraesCS7B02G335500/TraesCS7B02G335500	2
BP	GO:0009627	systemic acquired resistance	TraesCS7B02G335500/TraesCS7B02G335500	2
BP	GO:0010105	negative regulation of ethylene-activated signaling pathway	TraesCS7B02G335700	1
BP	GO:0070298	negative regulation of phosphorelay signal transduction system	TraesCS7B02G335700	1
BP	GO:0010104	regulation of ethylene-activated signaling pathway	TraesCS7B02G335700	1
BP	GO:0070297	regulation of phosphorelay signal transduction system	TraesCS7B02G335700	1
BP	GO:1902532	negative regulation of intracellular signal transduction	TraesCS7B02G335700	1
BP	GO:0009873	ethylene-activated signaling pathway	TraesCS7B02G335700	1
BP	GO:0006878	cellular copper ion homeostasis	TraesCS7B02G337700/TraesCS7B02G337700	2
BP	GO:0055070	copper ion homeostasis	TraesCS7B02G337700/TraesCS7B02G337700	2
BP	GO:0006995	cellular response to nitrogen starvation	TraesCS7B02G339000	1
BP	GO:0043562	cellular response to nitrogen levels	TraesCS7B02G339000	1
BP	GO:0009646	response to absence of light	TraesCS7B02G339000	1
BP	GO:0048354	mucilage biosynthetic process involved in seed coat development	TraesCS7B02G340100	1
BP	GO:0010413	glucuronoxylan metabolic process	TraesCS7B02G340100	1
BP	GO:0010417	glucuronoxylan biosynthetic process	TraesCS7B02G340100	1
BP	GO:0010192	mucilage biosynthetic process	TraesCS7B02G340100	1
BP	GO:0048359	mucilage metabolic process involved in seed coat development	TraesCS7B02G340100	1
BP	GO:0010191	mucilage metabolic process	TraesCS7B02G340100	1
BP	GO:0010214	seed coat development	TraesCS7B02G340100	1
BP	GO:0010051	xylem and phloem pattern formation	TraesCS7B02G340100	1
BP	GO:0045492	xylan biosynthetic process	TraesCS7B02G340100/TraesCS7B02G341900	2
BP	GO:0045491	xylan metabolic process	TraesCS7B02G340100/TraesCS7B02G341900	2
BP	GO:0010410	hemicellulose metabolic process	TraesCS7B02G340100/TraesCS7B02G341900	2
BP	GO:0009834	plant-type secondary cell wall biogenesis	TraesCS7B02G340100/TraesCS7B02G341900	2
BP	GO:0044038	cell wall macromolecule biosynthetic process	TraesCS7B02G340100/TraesCS7B02G341900/TraesCS7B02G343300/TraesCS7B02G343300	4
BP	GO:0070589	cellular component macromolecule biosynthetic process	TraesCS7B02G340100/TraesCS7B02G341900/TraesCS7B02G343300/TraesCS7B02G343300	4
BP	GO:0070592	cell wall polysaccharide biosynthetic process	TraesCS7B02G340100/TraesCS7B02G341900/TraesCS7B02G343300/TraesCS7B02G343300	4
BP	GO:0033692	cellular polysaccharide biosynthetic process	TraesCS7B02G340100/TraesCS7B02G341900/TraesCS7B02G343300/TraesCS7B02G343300	4
BP	GO:0000768	syncytium formation by plasma membrane fusion	TraesCS7B02G340200/TraesCS7B02G340200	2
BP	GO:0007520	myoblast fusion	TraesCS7B02G340200/TraesCS7B02G340200	2
BP	GO:0060142	regulation of syncytium formation by plasma membrane fusion	TraesCS7B02G340200/TraesCS7B02G340200	2
BP	GO:0060143	positive regulation of syncytium formation by plasma membrane fusion	TraesCS7B02G340200/TraesCS7B02G340200	2
BP	GO:1901739	regulation of myoblast fusion	TraesCS7B02G340200/TraesCS7B02G340200	2
BP	GO:1901741	positive regulation of myoblast fusion	TraesCS7B02G340200/TraesCS7B02G340200	2
BP	GO:2001135	regulation of endocytic recycling	TraesCS7B02G340200/TraesCS7B02G340200	2
BP	GO:2001137	positive regulation of endocytic recycling	TraesCS7B02G340200/TraesCS7B02G340200	2
BP	GO:1990089	response to nerve growth factor	TraesCS7B02G340200/TraesCS7B02G340200	2
BP	GO:1990090	cellular response to nerve growth factor stimulus	TraesCS7B02G340200/TraesCS7B02G340200	2
BP	GO:0010831	positive regulation of myotube differentiation	TraesCS7B02G340200/TraesCS7B02G340200	2
BP	GO:0051149	positive regulation of muscle cell differentiation	TraesCS7B02G340200/TraesCS7B02G340200	2
BP	GO:0051155	positive regulation of striated muscle cell differentiation	TraesCS7B02G340200/TraesCS7B02G340200	2
BP	GO:0010830	regulation of myotube differentiation	TraesCS7B02G340200/TraesCS7B02G340200	2
BP	GO:0014902	myotube differentiation	TraesCS7B02G340200/TraesCS7B02G340200	2
BP	GO:0051153	regulation of striated muscle cell differentiation	TraesCS7B02G340200/TraesCS7B02G340200	2
BP	GO:0061512	protein localization to cilium	TraesCS7B02G340200/TraesCS7B02G340200	2
BP	GO:0140253	cell-cell fusion	TraesCS7B02G340200/TraesCS7B02G340200	2
BP	GO:0051146	striated muscle cell differentiation	TraesCS7B02G340200/TraesCS7B02G340200	2
BP	GO:0032456	endocytic recycling	TraesCS7B02G340200/TraesCS7B02G340200	2
BP	GO:0006949	syncytium formation	TraesCS7B02G340200/TraesCS7B02G340200	2
BP	GO:0060271	cilium assembly	TraesCS7B02G340200/TraesCS7B02G340200	2
BP	GO:0045597	positive regulation of cell differentiation	TraesCS7B02G340200/TraesCS7B02G340200	2
BP	GO:0044782	cilium organization	TraesCS7B02G340200/TraesCS7B02G340200	2
BP	GO:0032388	positive regulation of intracellular transport	TraesCS7B02G340200/TraesCS7B02G340200	2
BP	GO:0031175	neuron projection development	TraesCS7B02G340200/TraesCS7B02G340200	2
BP	GO:0120031	plasma membrane bounded cell projection assembly	TraesCS7B02G340200/TraesCS7B02G340200	2
BP	GO:0030031	cell projection assembly	TraesCS7B02G340200/TraesCS7B02G340200	2
BP	GO:0048666	neuron development	TraesCS7B02G340200/TraesCS7B02G340200	2
BP	GO:0042538	hyperosmotic salinity response	TraesCS7B02G340200/TraesCS7B02G340200	2
BP	GO:0016197	endosomal transport	TraesCS7B02G340200/TraesCS7B02G340200	2
BP	GO:0030182	neuron differentiation	TraesCS7B02G340200/TraesCS7B02G340200	2
BP	GO:0048699	generation of neurons	TraesCS7B02G340200/TraesCS7B02G340200	2
BP	GO:0022008	neurogenesis	TraesCS7B02G340200/TraesCS7B02G340200	2
BP	GO:0051260	protein homooligomerization	TraesCS7B02G340200/TraesCS7B02G340200	2
BP	GO:0120036	plasma membrane bounded cell projection organization	TraesCS7B02G340200/TraesCS7B02G340200	2
BP	GO:0030030	cell projection organization	TraesCS7B02G340200/TraesCS7B02G340200	2
BP	GO:0098657	import into cell	TraesCS7B02G340200/TraesCS7B02G340200	2
BP	GO:0051050	positive regulation of transport	TraesCS7B02G340200/TraesCS7B02G340200	2
BP	GO:0006972	hyperosmotic response	TraesCS7B02G340200/TraesCS7B02G340200	2
BP	GO:0007399	nervous system development	TraesCS7B02G340200/TraesCS7B02G340200	2
BP	GO:0006897	endocytosis	TraesCS7B02G340200/TraesCS7B02G340200	2
BP	GO:0051259	protein complex oligomerization	TraesCS7B02G340200/TraesCS7B02G340200	2
BP	GO:0051147	regulation of muscle cell differentiation	TraesCS7B02G340200/TraesCS7B02G340200/TraesCS7B02G342500/TraesCS7B02G342500/TraesCS7B02G342500	5
BP	GO:0042692	muscle cell differentiation	TraesCS7B02G340200/TraesCS7B02G340200/TraesCS7B02G342500/TraesCS7B02G342500/TraesCS7B02G342500	5
BP	GO:0070848	response to growth factor	TraesCS7B02G340200/TraesCS7B02G340200/TraesCS7B02G342500/TraesCS7B02G342500/TraesCS7B02G342500	5
BP	GO:0071363	cellular response to growth factor stimulus	TraesCS7B02G340200/TraesCS7B02G340200/TraesCS7B02G342500/TraesCS7B02G342500/TraesCS7B02G342500	5
BP	GO:0061061	muscle structure development	TraesCS7B02G340200/TraesCS7B02G340200/TraesCS7B02G342500/TraesCS7B02G342500/TraesCS7B02G342500	5
BP	GO:0043624	cellular protein complex disassembly	TraesCS7B02G340300	1
BP	GO:0061025	membrane fusion	TraesCS7B02G340300	1
BP	GO:0032984	protein-containing complex disassembly	TraesCS7B02G340300	1
BP	GO:0022411	cellular component disassembly	TraesCS7B02G340300	1
BP	GO:0043154	negative regulation of cysteine-type endopeptidase activity involved in apoptotic process	TraesCS7B02G340500/TraesCS7B02G340600/TraesCS7B02G340700	3
BP	GO:0043281	regulation of cysteine-type endopeptidase activity involved in apoptotic process	TraesCS7B02G340500/TraesCS7B02G340600/TraesCS7B02G340700	3
BP	GO:2000117	negative regulation of cysteine-type endopeptidase activity	TraesCS7B02G340500/TraesCS7B02G340600/TraesCS7B02G340700	3
BP	GO:2000116	regulation of cysteine-type endopeptidase activity	TraesCS7B02G340500/TraesCS7B02G340600/TraesCS7B02G340700	3
BP	GO:0043066	negative regulation of apoptotic process	TraesCS7B02G340500/TraesCS7B02G340600/TraesCS7B02G340700	3
BP	GO:0010951	negative regulation of endopeptidase activity	TraesCS7B02G340500/TraesCS7B02G340600/TraesCS7B02G340700	3
BP	GO:0010466	negative regulation of peptidase activity	TraesCS7B02G340500/TraesCS7B02G340600/TraesCS7B02G340700	3
BP	GO:0052548	regulation of endopeptidase activity	TraesCS7B02G340500/TraesCS7B02G340600/TraesCS7B02G340700	3
BP	GO:0052547	regulation of peptidase activity	TraesCS7B02G340500/TraesCS7B02G340600/TraesCS7B02G340700	3
BP	GO:0045861	negative regulation of proteolysis	TraesCS7B02G340500/TraesCS7B02G340600/TraesCS7B02G340700	3
BP	GO:0043069	negative regulation of programmed cell death	TraesCS7B02G340500/TraesCS7B02G340600/TraesCS7B02G340700	3
BP	GO:0051346	negative regulation of hydrolase activity	TraesCS7B02G340500/TraesCS7B02G340600/TraesCS7B02G340700	3
BP	GO:0042981	regulation of apoptotic process	TraesCS7B02G340500/TraesCS7B02G340600/TraesCS7B02G340700	3
BP	GO:0060548	negative regulation of cell death	TraesCS7B02G340500/TraesCS7B02G340600/TraesCS7B02G340700	3
BP	GO:0006915	apoptotic process	TraesCS7B02G340500/TraesCS7B02G340600/TraesCS7B02G340700	3
BP	GO:0006334	nucleosome assembly	TraesCS7B02G341600	1
BP	GO:0034728	nucleosome organization	TraesCS7B02G341600	1
BP	GO:0031497	chromatin assembly	TraesCS7B02G341600	1
BP	GO:0006333	chromatin assembly or disassembly	TraesCS7B02G341600	1
BP	GO:0006323	DNA packaging	TraesCS7B02G341600	1
BP	GO:0065004	protein-DNA complex assembly	TraesCS7B02G341600	1
BP	GO:0071824	protein-DNA complex subunit organization	TraesCS7B02G341600	1
BP	GO:0043985	histone H4-R3 methylation	TraesCS7B02G342200	1
BP	GO:0034969	histone arginine methylation	TraesCS7B02G342200	1
BP	GO:0018195	peptidyl-arginine modification	TraesCS7B02G342200	1
BP	GO:0018216	peptidyl-arginine methylation	TraesCS7B02G342200	1
BP	GO:0010030	positive regulation of seed germination	TraesCS7B02G342200	1
BP	GO:0010029	regulation of seed germination	TraesCS7B02G342200	1
BP	GO:1900140	regulation of seedling development	TraesCS7B02G342200	1
BP	GO:0048582	positive regulation of post-embryonic development	TraesCS7B02G342200	1
BP	GO:0030509	BMP signaling pathway	TraesCS7B02G342500/TraesCS7B02G342500/TraesCS7B02G342500	3
BP	GO:0030510	regulation of BMP signaling pathway	TraesCS7B02G342500/TraesCS7B02G342500/TraesCS7B02G342500	3
BP	GO:0030514	negative regulation of BMP signaling pathway	TraesCS7B02G342500/TraesCS7B02G342500/TraesCS7B02G342500	3
BP	GO:0051151	negative regulation of smooth muscle cell differentiation	TraesCS7B02G342500/TraesCS7B02G342500/TraesCS7B02G342500	3
BP	GO:0071772	response to BMP	TraesCS7B02G342500/TraesCS7B02G342500/TraesCS7B02G342500	3
BP	GO:0071773	cellular response to BMP stimulus	TraesCS7B02G342500/TraesCS7B02G342500/TraesCS7B02G342500	3
BP	GO:0051148	negative regulation of muscle cell differentiation	TraesCS7B02G342500/TraesCS7B02G342500/TraesCS7B02G342500	3
BP	GO:0051145	smooth muscle cell differentiation	TraesCS7B02G342500/TraesCS7B02G342500/TraesCS7B02G342500	3
BP	GO:0051150	regulation of smooth muscle cell differentiation	TraesCS7B02G342500/TraesCS7B02G342500/TraesCS7B02G342500	3
BP	GO:0048661	positive regulation of smooth muscle cell proliferation	TraesCS7B02G342500/TraesCS7B02G342500/TraesCS7B02G342500	3
BP	GO:0048546	digestive tract morphogenesis	TraesCS7B02G342500/TraesCS7B02G342500/TraesCS7B02G342500	3
BP	GO:0048557	embryonic digestive tract morphogenesis	TraesCS7B02G342500/TraesCS7B02G342500/TraesCS7B02G342500	3
BP	GO:0048566	embryonic digestive tract development	TraesCS7B02G342500/TraesCS7B02G342500/TraesCS7B02G342500	3
BP	GO:0090288	negative regulation of cellular response to growth factor stimulus	TraesCS7B02G342500/TraesCS7B02G342500/TraesCS7B02G342500	3
BP	GO:0033002	muscle cell proliferation	TraesCS7B02G342500/TraesCS7B02G342500/TraesCS7B02G342500	3
BP	GO:0048659	smooth muscle cell proliferation	TraesCS7B02G342500/TraesCS7B02G342500/TraesCS7B02G342500	3
BP	GO:0048660	regulation of smooth muscle cell proliferation	TraesCS7B02G342500/TraesCS7B02G342500/TraesCS7B02G342500	3
BP	GO:0090287	regulation of cellular response to growth factor stimulus	TraesCS7B02G342500/TraesCS7B02G342500/TraesCS7B02G342500	3
BP	GO:0090101	negative regulation of transmembrane receptor protein serine/threonine kinase signaling pathway	TraesCS7B02G342500/TraesCS7B02G342500/TraesCS7B02G342500	3
BP	GO:0048565	digestive tract development	TraesCS7B02G342500/TraesCS7B02G342500/TraesCS7B02G342500	3
BP	GO:0055123	digestive system development	TraesCS7B02G342500/TraesCS7B02G342500/TraesCS7B02G342500	3
BP	GO:0090092	regulation of transmembrane receptor protein serine/threonine kinase signaling pathway	TraesCS7B02G342500/TraesCS7B02G342500/TraesCS7B02G342500	3
BP	GO:0048562	embryonic organ morphogenesis	TraesCS7B02G342500/TraesCS7B02G342500/TraesCS7B02G342500	3
BP	GO:0048568	embryonic organ development	TraesCS7B02G342500/TraesCS7B02G342500/TraesCS7B02G342500	3
BP	GO:0035239	tube morphogenesis	TraesCS7B02G342500/TraesCS7B02G342500/TraesCS7B02G342500	3
BP	GO:0009887	animal organ morphogenesis	TraesCS7B02G342500/TraesCS7B02G342500/TraesCS7B02G342500	3
BP	GO:0008284	positive regulation of cell population proliferation	TraesCS7B02G342500/TraesCS7B02G342500/TraesCS7B02G342500	3
BP	GO:0045596	negative regulation of cell differentiation	TraesCS7B02G342500/TraesCS7B02G342500/TraesCS7B02G342500	3
BP	GO:0035295	tube development	TraesCS7B02G342500/TraesCS7B02G342500/TraesCS7B02G342500	3
BP	GO:0048598	embryonic morphogenesis	TraesCS7B02G342500/TraesCS7B02G342500/TraesCS7B02G342500	3
BP	GO:0042274	ribosomal small subunit biogenesis	TraesCS7B02G342600/TraesCS7B02G342700	2
BP	GO:0045814	negative regulation of gene expression	TraesCS7B02G342800/TraesCS7B02G342800/TraesCS7B02G342800	3
BP	GO:0006348	chromatin silencing at telomere	TraesCS7B02G342800/TraesCS7B02G342800/TraesCS7B02G342800	3
BP	GO:0031938	regulation of chromatin silencing at telomere	TraesCS7B02G342800/TraesCS7B02G342800/TraesCS7B02G342800	3
BP	GO:0000056	ribosomal small subunit export from nucleus	TraesCS7B02G342800/TraesCS7B02G342800/TraesCS7B02G342800	3
BP	GO:0000054	ribosomal subunit export from nucleus	TraesCS7B02G342800/TraesCS7B02G342800/TraesCS7B02G342800	3
BP	GO:0033750	ribosome localization	TraesCS7B02G342800/TraesCS7B02G342800/TraesCS7B02G342800	3
BP	GO:0071428	rRNA-containing ribonucleoprotein complex export from nucleus	TraesCS7B02G342800/TraesCS7B02G342800/TraesCS7B02G342800	3
BP	GO:0031935	regulation of chromatin silencing	TraesCS7B02G342800/TraesCS7B02G342800/TraesCS7B02G342800	3
BP	GO:0000082	G1/S transition of mitotic cell cycle	TraesCS7B02G342800/TraesCS7B02G342800/TraesCS7B02G342800	3
BP	GO:0007051	spindle organization	TraesCS7B02G342800/TraesCS7B02G342800/TraesCS7B02G342800	3
BP	GO:0044843	cell cycle G1/S phase transition	TraesCS7B02G342800/TraesCS7B02G342800/TraesCS7B02G342800	3
BP	GO:0060968	regulation of gene silencing	TraesCS7B02G342800/TraesCS7B02G342800/TraesCS7B02G342800	3
BP	GO:0006606	protein import into nucleus	TraesCS7B02G342800/TraesCS7B02G342800/TraesCS7B02G342800	3
BP	GO:0051170	import into nucleus	TraesCS7B02G342800/TraesCS7B02G342800/TraesCS7B02G342800	3
BP	GO:0071166	ribonucleoprotein complex localization	TraesCS7B02G342800/TraesCS7B02G342800/TraesCS7B02G342800	3
BP	GO:0071426	ribonucleoprotein complex export from nucleus	TraesCS7B02G342800/TraesCS7B02G342800/TraesCS7B02G342800	3
BP	GO:0034504	protein localization to nucleus	TraesCS7B02G342800/TraesCS7B02G342800/TraesCS7B02G342800	3
BP	GO:1902275	regulation of chromatin organization	TraesCS7B02G342800/TraesCS7B02G342800/TraesCS7B02G342800	3
BP	GO:0031503	protein-containing complex localization	TraesCS7B02G342800/TraesCS7B02G342800/TraesCS7B02G342800	3
BP	GO:0006405	RNA export from nucleus	TraesCS7B02G342800/TraesCS7B02G342800/TraesCS7B02G342800	3
BP	GO:0050657	nucleic acid transport	TraesCS7B02G342800/TraesCS7B02G342800/TraesCS7B02G342800	3
BP	GO:0050658	RNA transport	TraesCS7B02G342800/TraesCS7B02G342800/TraesCS7B02G342800	3
BP	GO:0051236	establishment of RNA localization	TraesCS7B02G342800/TraesCS7B02G342800/TraesCS7B02G342800	3
BP	GO:0006611	protein export from nucleus	TraesCS7B02G342800/TraesCS7B02G342800/TraesCS7B02G342800	3
BP	GO:0006403	RNA localization	TraesCS7B02G342800/TraesCS7B02G342800/TraesCS7B02G342800	3
BP	GO:0051656	establishment of organelle localization	TraesCS7B02G342800/TraesCS7B02G342800/TraesCS7B02G342800	3
BP	GO:0006342	chromatin silencing	TraesCS7B02G342800/TraesCS7B02G342800/TraesCS7B02G342800	3
BP	GO:0051168	nuclear export	TraesCS7B02G342800/TraesCS7B02G342800/TraesCS7B02G342800	3
BP	GO:0097549	chromatin organization involved in negative regulation of transcription	TraesCS7B02G342800/TraesCS7B02G342800/TraesCS7B02G342800	3
BP	GO:0034401	chromatin organization involved in regulation of transcription	TraesCS7B02G342800/TraesCS7B02G342800/TraesCS7B02G342800	3
BP	GO:0044772	mitotic cell cycle phase transition	TraesCS7B02G342800/TraesCS7B02G342800/TraesCS7B02G342800	3
BP	GO:0044770	cell cycle phase transition	TraesCS7B02G342800/TraesCS7B02G342800/TraesCS7B02G342800	3
BP	GO:0052325	cell wall pectin biosynthetic process	TraesCS7B02G343300/TraesCS7B02G343300	2
BP	GO:0045489	pectin biosynthetic process	TraesCS7B02G343300/TraesCS7B02G343300	2
CC	GO:0043253	chloroplast ribosome	TraesCS7B02G313200	1
CC	GO:0009547	plastid ribosome	TraesCS7B02G313200	1
CC	GO:0005762	mitochondrial large ribosomal subunit	TraesCS7B02G313200	1
CC	GO:0000315	organellar large ribosomal subunit	TraesCS7B02G313200	1
CC	GO:0005761	mitochondrial ribosome	TraesCS7B02G313200	1
CC	GO:0000313	organellar ribosome	TraesCS7B02G313200	1
CC	GO:0022625	cytosolic large ribosomal subunit	TraesCS7B02G313200/TraesCS7B02G324000/TraesCS7B02G332300	3
CC	GO:0015934	large ribosomal subunit	TraesCS7B02G313200/TraesCS7B02G324000/TraesCS7B02G332300	3
CC	GO:0009543	chloroplast thylakoid lumen	TraesCS7B02G313800	1
CC	GO:0031978	plastid thylakoid lumen	TraesCS7B02G313800	1
CC	GO:0031977	thylakoid lumen	TraesCS7B02G313800/TraesCS7B02G320200	2
CC	GO:0008250	oligosaccharyltransferase complex	TraesCS7B02G315600	1
CC	GO:0042788	polysomal ribosome	TraesCS7B02G319200	1
CC	GO:0005844	polysome	TraesCS7B02G319200	1
CC	GO:0035861	site of double-strand break	TraesCS7B02G319400/TraesCS7B02G333100/TraesCS7B02G335900/TraesCS7B02G335900	4
CC	GO:0090734	site of DNA damage	TraesCS7B02G319400/TraesCS7B02G333100/TraesCS7B02G335900/TraesCS7B02G335900	4
CC	GO:0090406	pollen tube	TraesCS7B02G319900/TraesCS7B02G319900/TraesCS7B02G327600	3
CC	GO:0090575	RNA polymerase II transcription regulator complex	TraesCS7B02G321400	1
CC	GO:0008540	proteasome regulatory particle	TraesCS7B02G321900/TraesCS7B02G322000	2
CC	GO:0034515	proteasome storage granule	TraesCS7B02G321900/TraesCS7B02G322000	2
CC	GO:0031597	cytosolic proteasome complex	TraesCS7B02G321900/TraesCS7B02G322000	2
CC	GO:0005838	proteasome regulatory particle	TraesCS7B02G321900/TraesCS7B02G322000	2
CC	GO:0022624	proteasome accessory complex	TraesCS7B02G321900/TraesCS7B02G322000	2
CC	GO:0000502	proteasome complex	TraesCS7B02G321900/TraesCS7B02G322000	2
CC	GO:1905369	endopeptidase complex	TraesCS7B02G321900/TraesCS7B02G322000	2
CC	GO:1905368	peptidase complex	TraesCS7B02G321900/TraesCS7B02G322000	2
CC	GO:1990861	Ubp3-Bre5 deubiquitination complex	TraesCS7B02G322100	1
CC	GO:0010494	cytoplasmic stress granule	TraesCS7B02G322100	1
CC	GO:0036464	cytoplasmic ribonucleoprotein granule	TraesCS7B02G322100	1
CC	GO:0035770	ribonucleoprotein granule	TraesCS7B02G322100	1
CC	GO:0005846	nuclear cap binding complex	TraesCS7B02G323700/TraesCS7B02G323700	2
CC	GO:0010445	nuclear dicing body	TraesCS7B02G323700/TraesCS7B02G323700	2
CC	GO:0034518	RNA cap binding complex	TraesCS7B02G323700/TraesCS7B02G323700	2
CC	GO:0016607	nuclear speck	TraesCS7B02G323700/TraesCS7B02G323700	2
CC	GO:0012506	vesicle membrane	TraesCS7B02G327900	1
CC	GO:0030687	preribosome	TraesCS7B02G331000/TraesCS7B02G332300	2
CC	GO:0030684	preribosome	TraesCS7B02G331000/TraesCS7B02G332300/TraesCS7B02G342600/TraesCS7B02G342700	4
CC	GO:0005662	DNA replication factor A complex	TraesCS7B02G333100	1
CC	GO:0030894	replisome	TraesCS7B02G333100	1
CC	GO:0043601	nuclear replisome	TraesCS7B02G333100	1
CC	GO:0043596	nuclear replication fork	TraesCS7B02G333100	1
CC	GO:0005657	replication fork	TraesCS7B02G333100	1
CC	GO:0032993	protein-DNA complex	TraesCS7B02G333100/TraesCS7B02G341600	2
CC	GO:0000139	Golgi membrane	TraesCS7B02G340100	1
CC	GO:0020016	ciliary pocket	TraesCS7B02G340200/TraesCS7B02G340200	2
CC	GO:0020018	ciliary pocket membrane	TraesCS7B02G340200/TraesCS7B02G340200	2
CC	GO:0055038	recycling endosome membrane	TraesCS7B02G340200/TraesCS7B02G340200	2
CC	GO:0060170	ciliary membrane	TraesCS7B02G340200/TraesCS7B02G340200	2
CC	GO:0031253	cell projection membrane	TraesCS7B02G340200/TraesCS7B02G340200	2
CC	GO:0055037	recycling endosome	TraesCS7B02G340200/TraesCS7B02G340200	2
CC	GO:0031901	early endosome membrane	TraesCS7B02G340200/TraesCS7B02G340200	2
CC	GO:0005929	cilium	TraesCS7B02G340200/TraesCS7B02G340200	2
CC	GO:0098590	plasma membrane region	TraesCS7B02G340200/TraesCS7B02G340200	2
CC	GO:0005769	early endosome	TraesCS7B02G340200/TraesCS7B02G340200	2
CC	GO:0010008	endosome membrane	TraesCS7B02G340200/TraesCS7B02G340200	2
CC	GO:0031201	SNARE complex	TraesCS7B02G340300	1
CC	GO:0000786	nucleosome	TraesCS7B02G341600	1
CC	GO:0044815	DNA packaging complex	TraesCS7B02G341600	1
CC	GO:0001650	fibrillar center	TraesCS7B02G342600/TraesCS7B02G342700	2
CC	GO:0030686	90S preribosome	TraesCS7B02G342600/TraesCS7B02G342700	2
CC	GO:0032040	small-subunit processome	TraesCS7B02G342600/TraesCS7B02G342700	2
MF	GO:0070180	large ribosomal subunit rRNA binding	TraesCS7B02G313200	1
MF	GO:0019843	rRNA binding	TraesCS7B02G313200/TraesCS7B02G342600/TraesCS7B02G342700	3
MF	GO:0035251	UDP-glucosyltransferase activity	TraesCS7B02G314000/TraesCS7B02G322400/TraesCS7B02G323400	3
MF	GO:0004402	histone acetyltransferase activity	TraesCS7B02G314400/TraesCS7B02G314400	2
MF	GO:0061733	peptide-lysine-N-acetyltransferase activity	TraesCS7B02G314400/TraesCS7B02G314400	2
MF	GO:0034212	peptide N-acetyltransferase activity	TraesCS7B02G314400/TraesCS7B02G314400	2
MF	GO:0008080	N-acetyltransferase activity	TraesCS7B02G314400/TraesCS7B02G314400	2
MF	GO:0016410	N-acyltransferase activity	TraesCS7B02G314400/TraesCS7B02G314400	2
MF	GO:0016407	acetyltransferase activity	TraesCS7B02G314400/TraesCS7B02G314400	2
MF	GO:0016886	ligase activity	TraesCS7B02G314600/TraesCS7B02G314600	2
MF	GO:0003909	DNA ligase activity	TraesCS7B02G314600/TraesCS7B02G314600	2
MF	GO:0003910	DNA ligase (ATP) activity	TraesCS7B02G314600/TraesCS7B02G314600	2
MF	GO:0016836	hydro-lyase activity	TraesCS7B02G314800	1
MF	GO:0016835	carbon-oxygen lyase activity	TraesCS7B02G314800	1
MF	GO:0005199	structural constituent of cell wall	TraesCS7B02G314900	1
MF	GO:0016814	hydrolase activity	TraesCS7B02G315700/TraesCS7B02G315700	2
MF	GO:0008686	4-dihydroxy-2-butanone-4-phosphate synthase activity	TraesCS7B02G315700/TraesCS7B02G315700	2
MF	GO:0003935	GTP cyclohydrolase II activity	TraesCS7B02G315700/TraesCS7B02G315700	2
MF	GO:0003933	GTP cyclohydrolase activity	TraesCS7B02G315700/TraesCS7B02G315700	2
MF	GO:0019238	cyclohydrolase activity	TraesCS7B02G315700/TraesCS7B02G315700	2
MF	GO:0016830	carbon-carbon lyase activity	TraesCS7B02G315700/TraesCS7B02G315700	2
MF	GO:0016810	hydrolase activity	TraesCS7B02G315700/TraesCS7B02G315700/TraesCS7B02G335500/TraesCS7B02G335500	4
MF	GO:0009702	L-arabinokinase activity	TraesCS7B02G317000/TraesCS7B02G317000/TraesCS7B02G317000	3
MF	GO:0019200	carbohydrate kinase activity	TraesCS7B02G317000/TraesCS7B02G317000/TraesCS7B02G317000	3
MF	GO:0008327	methyl-CpG binding	TraesCS7B02G317400	1
MF	GO:0015081	sodium ion transmembrane transporter activity	TraesCS7B02G318800	1
MF	GO:0008893	guanosine-3'	TraesCS7B02G318900	1
MF	GO:0008728	GTP diphosphokinase activity	TraesCS7B02G318900	1
MF	GO:0016794	diphosphoric monoester hydrolase activity	TraesCS7B02G318900	1
MF	GO:0016778	diphosphotransferase activity	TraesCS7B02G318900	1
MF	GO:0005506	iron ion binding	TraesCS7B02G319100	1
MF	GO:0016859	cis-trans isomerase activity	TraesCS7B02G319100/TraesCS7B02G320200	2
MF	GO:0016779	nucleotidyltransferase activity	TraesCS7B02G319400/TraesCS7B02G319900/TraesCS7B02G319900/TraesCS7B02G335900/TraesCS7B02G335900	5
MF	GO:0003887	DNA-directed DNA polymerase activity	TraesCS7B02G319400/TraesCS7B02G335900/TraesCS7B02G335900	3
MF	GO:0034061	DNA polymerase activity	TraesCS7B02G319400/TraesCS7B02G335900/TraesCS7B02G335900	3
MF	GO:0003983	UTP:glucose-1-phosphate uridylyltransferase activity	TraesCS7B02G319900/TraesCS7B02G319900	2
MF	GO:0051748	UTP-monosaccharide-1-phosphate uridylyltransferase activity	TraesCS7B02G319900/TraesCS7B02G319900	2
MF	GO:0070569	uridylyltransferase activity	TraesCS7B02G319900/TraesCS7B02G319900	2
MF	GO:0016018	cyclosporin A binding	TraesCS7B02G320200	1
MF	GO:0003755	peptidyl-prolyl cis-trans isomerase activity	TraesCS7B02G320200	1
MF	GO:0042277	peptide binding	TraesCS7B02G320200	1
MF	GO:0033218	amide binding	TraesCS7B02G320200	1
MF	GO:0005381	iron ion transmembrane transporter activity	TraesCS7B02G321200/TraesCS7B02G321200	2
MF	GO:0005385	zinc ion transmembrane transporter activity	TraesCS7B02G321200/TraesCS7B02G321200/TraesCS7B02G337700/TraesCS7B02G337700	4
MF	GO:0046915	transition metal ion transmembrane transporter activity	TraesCS7B02G321200/TraesCS7B02G321200/TraesCS7B02G337700/TraesCS7B02G337700	4
MF	GO:0072509	divalent inorganic cation transmembrane transporter activity	TraesCS7B02G321200/TraesCS7B02G321200/TraesCS7B02G337700/TraesCS7B02G337700	4
MF	GO:0000977	RNA polymerase II transcription regulatory region sequence-specific DNA binding	TraesCS7B02G321400/TraesCS7B02G323600	2
MF	GO:0000976	transcription regulatory region sequence-specific DNA binding	TraesCS7B02G321400/TraesCS7B02G323600/TraesCS7B02G342200	3
MF	GO:0004252	serine-type endopeptidase activity	TraesCS7B02G321700	1
MF	GO:0008236	serine-type peptidase activity	TraesCS7B02G321700	1
MF	GO:0017171	serine hydrolase activity	TraesCS7B02G321700	1
MF	GO:0016899	oxidoreductase activity	TraesCS7B02G321800	1
MF	GO:0016614	oxidoreductase activity	TraesCS7B02G321800	1
MF	GO:0050105	L-gulonolactone oxidase activity	TraesCS7B02G321800	1
MF	GO:0050660	flavin adenine dinucleotide binding	TraesCS7B02G321800	1
MF	GO:0043130	ubiquitin binding	TraesCS7B02G321900/TraesCS7B02G322000	2
MF	GO:0032182	ubiquitin-like protein binding	TraesCS7B02G321900/TraesCS7B02G322000	2
MF	GO:1905538	polysome binding	TraesCS7B02G322100	1
MF	GO:0043021	ribonucleoprotein complex binding	TraesCS7B02G322100	1
MF	GO:0080043	quercetin 3-O-glucosyltransferase activity	TraesCS7B02G322400/TraesCS7B02G323400	2
MF	GO:0080044	quercetin 7-O-glucosyltransferase activity	TraesCS7B02G322400/TraesCS7B02G323400	2
MF	GO:0016769	transferase activity	TraesCS7B02G322500/TraesCS7B02G322500/TraesCS7B02G322500/TraesCS7B02G322500/TraesCS7B02G322500/TraesCS7B02G322500	6
MF	GO:0046820	4-amino-4-deoxychorismate synthase activity	TraesCS7B02G322500/TraesCS7B02G322500/TraesCS7B02G322500/TraesCS7B02G322500/TraesCS7B02G322500/TraesCS7B02G322500	6
MF	GO:0008483	transaminase activity	TraesCS7B02G322500/TraesCS7B02G322500/TraesCS7B02G322500/TraesCS7B02G322500/TraesCS7B02G322500/TraesCS7B02G322500	6
MF	GO:0004707	MAP kinase activity	TraesCS7B02G322900	1
MF	GO:0003993	acid phosphatase activity	TraesCS7B02G323200	1
MF	GO:0001228	DNA-binding transcription activator activity	TraesCS7B02G323600	1
MF	GO:0001085	RNA polymerase II transcription factor binding	TraesCS7B02G323600	1
MF	GO:0001216	DNA-binding transcription activator activity	TraesCS7B02G323600	1
MF	GO:0004713	protein tyrosine kinase activity	TraesCS7B02G324500	1
MF	GO:0004675	transmembrane receptor protein serine/threonine kinase activity	TraesCS7B02G324500/TraesCS7B02G325300/TraesCS7B02G333200	3
MF	GO:0033612	receptor serine/threonine kinase binding	TraesCS7B02G325300	1
MF	GO:0005102	signaling receptor binding	TraesCS7B02G325300	1
MF	GO:0004722	protein serine/threonine phosphatase activity	TraesCS7B02G326200	1
MF	GO:0004721	phosphoprotein phosphatase activity	TraesCS7B02G326200	1
MF	GO:0052725	inositol-1	TraesCS7B02G327600	1
MF	GO:0051766	inositol trisphosphate kinase activity	TraesCS7B02G327600	1
MF	GO:0051765	inositol tetrakisphosphate kinase activity	TraesCS7B02G327600	1
MF	GO:0005460	UDP-glucose transmembrane transporter activity	TraesCS7B02G327900	1
MF	GO:0015165	pyrimidine nucleotide-sugar transmembrane transporter activity	TraesCS7B02G327900	1
MF	GO:0005338	nucleotide-sugar transmembrane transporter activity	TraesCS7B02G327900	1
MF	GO:0015932	nucleobase-containing compound transmembrane transporter activity	TraesCS7B02G327900	1
MF	GO:1901505	carbohydrate derivative transmembrane transporter activity	TraesCS7B02G327900	1
MF	GO:0031624	ubiquitin conjugating enzyme binding	TraesCS7B02G328500	1
MF	GO:0044390	ubiquitin-like protein conjugating enzyme binding	TraesCS7B02G328500	1
MF	GO:0140102	catalytic activity	TraesCS7B02G331000	1
MF	GO:0008650	rRNA (uridine-2'-O-)-methyltransferase activity	TraesCS7B02G331000	1
MF	GO:0016436	rRNA (uridine) methyltransferase activity	TraesCS7B02G331000	1
MF	GO:0016435	rRNA (guanine) methyltransferase activity	TraesCS7B02G331000	1
MF	GO:0062105	RNA 2'-O-methyltransferase activity	TraesCS7B02G331000	1
MF	GO:0008649	rRNA methyltransferase activity	TraesCS7B02G331000	1
MF	GO:0008173	RNA methyltransferase activity	TraesCS7B02G331000	1
MF	GO:0008171	O-methyltransferase activity	TraesCS7B02G331000	1
MF	GO:0001653	peptide receptor activity	TraesCS7B02G335000/TraesCS7B02G335000	2
MF	GO:0005509	calcium ion binding	TraesCS7B02G335200	1
MF	GO:0019829	ATPase-coupled cation transmembrane transporter activity	TraesCS7B02G337700/TraesCS7B02G337700	2
MF	GO:0042625	ATPase-coupled ion transmembrane transporter activity	TraesCS7B02G337700/TraesCS7B02G337700	2
MF	GO:0070492	oligosaccharide binding	TraesCS7B02G337800	1
MF	GO:0031210	phosphatidylcholine binding	TraesCS7B02G337800	1
MF	GO:0050997	quaternary ammonium group binding	TraesCS7B02G337800	1
MF	GO:0070405	ammonium ion binding	TraesCS7B02G337800	1
MF	GO:0030246	carbohydrate binding	TraesCS7B02G337800	1
MF	GO:0005543	phospholipid binding	TraesCS7B02G337800	1
MF	GO:0016639	oxidoreductase activity	TraesCS7B02G339000	1
MF	GO:0016638	oxidoreductase activity	TraesCS7B02G339000	1
MF	GO:0004353	glutamate dehydrogenase [NAD(P)+] activity	TraesCS7B02G339000	1
MF	GO:0050897	cobalt ion binding	TraesCS7B02G339000	1
MF	GO:0005507	copper ion binding	TraesCS7B02G339000	1
MF	GO:0047517	1	TraesCS7B02G340100	1
MF	GO:0016763	transferase activity	TraesCS7B02G340100	1
MF	GO:0042285	xylosyltransferase activity	TraesCS7B02G340100	1
MF	GO:0005483	soluble NSF attachment protein activity	TraesCS7B02G340300	1
MF	GO:0019905	syntaxin binding	TraesCS7B02G340300	1
MF	GO:0000149	SNARE binding	TraesCS7B02G340300	1
MF	GO:0030674	protein-macromolecule adaptor activity	TraesCS7B02G340300	1
MF	GO:0060090	molecular adaptor activity	TraesCS7B02G340300	1
MF	GO:0043027	cysteine-type endopeptidase inhibitor activity involved in apoptotic process	TraesCS7B02G340500/TraesCS7B02G340600/TraesCS7B02G340700	3
MF	GO:0043028	cysteine-type endopeptidase regulator activity involved in apoptotic process	TraesCS7B02G340500/TraesCS7B02G340600/TraesCS7B02G340700	3
MF	GO:0004869	cysteine-type endopeptidase inhibitor activity	TraesCS7B02G340500/TraesCS7B02G340600/TraesCS7B02G340700	3
MF	GO:0004866	endopeptidase inhibitor activity	TraesCS7B02G340500/TraesCS7B02G340600/TraesCS7B02G340700	3
MF	GO:0030414	peptidase inhibitor activity	TraesCS7B02G340500/TraesCS7B02G340600/TraesCS7B02G340700	3
MF	GO:0061135	endopeptidase regulator activity	TraesCS7B02G340500/TraesCS7B02G340600/TraesCS7B02G340700	3
MF	GO:0061134	peptidase regulator activity	TraesCS7B02G340500/TraesCS7B02G340600/TraesCS7B02G340700	3
MF	GO:0004857	enzyme inhibitor activity	TraesCS7B02G340500/TraesCS7B02G340600/TraesCS7B02G340700	3
MF	GO:0031492	nucleosomal DNA binding	TraesCS7B02G341600	1
MF	GO:0031491	nucleosome binding	TraesCS7B02G341600	1
MF	GO:0031490	chromatin DNA binding	TraesCS7B02G341600	1
MF	GO:0000987	cis-regulatory region sequence-specific DNA binding	TraesCS7B02G342200	1
MF	GO:0042134	rRNA primary transcript binding	TraesCS7B02G342600/TraesCS7B02G342700	2
MF	GO:0043047	single-stranded telomeric DNA binding	TraesCS7B02G342600/TraesCS7B02G342700	2
MF	GO:0098847	sequence-specific single stranded DNA binding	TraesCS7B02G342600/TraesCS7B02G342700	2
MF	GO:0030515	snoRNA binding	TraesCS7B02G342600/TraesCS7B02G342700	2
MF	GO:0042162	telomeric DNA binding	TraesCS7B02G342600/TraesCS7B02G342700	2
MF	GO:0003697	single-stranded DNA binding	TraesCS7B02G342600/TraesCS7B02G342700	2
MF	GO:0008536	Ran GTPase binding	TraesCS7B02G342800/TraesCS7B02G342800/TraesCS7B02G342800	3
MF	GO:0017016	Ras GTPase binding	TraesCS7B02G342800/TraesCS7B02G342800/TraesCS7B02G342800	3
MF	GO:0031267	small GTPase binding	TraesCS7B02G342800/TraesCS7B02G342800/TraesCS7B02G342800	3
MF	GO:0051020	GTPase binding	TraesCS7B02G342800/TraesCS7B02G342800/TraesCS7B02G342800	3

## Sheet: Appendix F
Appendix F: Functional annotation and enrichment of Cd content QTL on Chromosome 7DS
ONTOLOGY	ID	Description	geneID	Count
BP	GO:0043123	positive regulation of I-kappaB kinase/NF-kappaB signaling	TraesCS7D02G100100	1
BP	GO:0007249	I-kappaB kinase/NF-kappaB signaling	TraesCS7D02G100100	1
BP	GO:0043122	regulation of I-kappaB kinase/NF-kappaB signaling	TraesCS7D02G100100	1
BP	GO:0034612	response to tumor necrosis factor	TraesCS7D02G100100	1
BP	GO:0002573	myeloid leukocyte differentiation	TraesCS7D02G100100	1
BP	GO:0030099	myeloid cell differentiation	TraesCS7D02G100100	1
BP	GO:0002521	leukocyte differentiation	TraesCS7D02G100100	1
BP	GO:0002274	myeloid leukocyte activation	TraesCS7D02G100100	1
BP	GO:0034341	response to interferon-gamma	TraesCS7D02G100100	1
BP	GO:0043687	post-translational protein modification	TraesCS7D02G100100	1
BP	GO:0030097	hemopoiesis	TraesCS7D02G100100	1
BP	GO:0045321	leukocyte activation	TraesCS7D02G100100	1
BP	GO:0001775	cell activation	TraesCS7D02G100100	1
BP	GO:0048534	hematopoietic or lymphoid organ development	TraesCS7D02G100100	1
BP	GO:0034097	response to cytokine	TraesCS7D02G100100	1
BP	GO:0002520	immune system development	TraesCS7D02G100100	1
BP	GO:1901990	regulation of mitotic cell cycle phase transition	TraesCS7D02G100100	1
BP	GO:1901987	regulation of cell cycle phase transition	TraesCS7D02G100100	1
BP	GO:0044772	mitotic cell cycle phase transition	TraesCS7D02G100100	1
BP	GO:0044770	cell cycle phase transition	TraesCS7D02G100100	1
BP	GO:0043065	positive regulation of apoptotic process	TraesCS7D02G100100/TraesCS7D02G107300	2
BP	GO:0043068	positive regulation of programmed cell death	TraesCS7D02G100100/TraesCS7D02G107300	2
BP	GO:0010942	positive regulation of cell death	TraesCS7D02G100100/TraesCS7D02G107300	2
BP	GO:1902533	positive regulation of intracellular signal transduction	TraesCS7D02G100100/TraesCS7D02G107300	2
BP	GO:0042981	regulation of apoptotic process	TraesCS7D02G100100/TraesCS7D02G107300	2
BP	GO:0006915	apoptotic process	TraesCS7D02G100100/TraesCS7D02G107300	2
BP	GO:0035725	sodium ion transmembrane transport	TraesCS7D02G100200	1
BP	GO:0055074	calcium ion homeostasis	TraesCS7D02G100200	1
BP	GO:0006814	sodium ion transport	TraesCS7D02G100200	1
BP	GO:0072507	divalent inorganic cation homeostasis	TraesCS7D02G100200	1
BP	GO:0070588	calcium ion transmembrane transport	TraesCS7D02G100200	1
BP	GO:0006816	calcium ion transport	TraesCS7D02G100200	1
BP	GO:0070838	divalent metal ion transport	TraesCS7D02G100200	1
BP	GO:0072511	divalent inorganic cation transport	TraesCS7D02G100200	1
BP	GO:0061615	glycolytic process through fructose-6-phosphate	TraesCS7D02G101300	1
BP	GO:0042866	pyruvate biosynthetic process	TraesCS7D02G101300	1
BP	GO:0006096	glycolytic process	TraesCS7D02G101300	1
BP	GO:0006757	ATP generation from ADP	TraesCS7D02G101300	1
BP	GO:0046031	ADP metabolic process	TraesCS7D02G101300	1
BP	GO:0009135	purine nucleoside diphosphate metabolic process	TraesCS7D02G101300	1
BP	GO:0009179	purine ribonucleoside diphosphate metabolic process	TraesCS7D02G101300	1
BP	GO:0019359	nicotinamide nucleotide biosynthetic process	TraesCS7D02G101300	1
BP	GO:0046835	carbohydrate phosphorylation	TraesCS7D02G101300	1
BP	GO:0019363	pyridine nucleotide biosynthetic process	TraesCS7D02G101300	1
BP	GO:0009185	ribonucleoside diphosphate metabolic process	TraesCS7D02G101300	1
BP	GO:0006165	nucleoside diphosphate phosphorylation	TraesCS7D02G101300	1
BP	GO:0072525	pyridine-containing compound biosynthetic process	TraesCS7D02G101300	1
BP	GO:0009166	nucleotide catabolic process	TraesCS7D02G101300	1
BP	GO:0009132	nucleoside diphosphate metabolic process	TraesCS7D02G101300	1
BP	GO:1901292	nucleoside phosphate catabolic process	TraesCS7D02G101300	1
BP	GO:0046939	nucleotide phosphorylation	TraesCS7D02G101300	1
BP	GO:0006090	pyruvate metabolic process	TraesCS7D02G101300	1
BP	GO:0046496	nicotinamide nucleotide metabolic process	TraesCS7D02G101300	1
BP	GO:0019362	pyridine nucleotide metabolic process	TraesCS7D02G101300	1
BP	GO:0006754	ATP biosynthetic process	TraesCS7D02G101300	1
BP	GO:0009127	purine nucleoside monophosphate biosynthetic process	TraesCS7D02G101300	1
BP	GO:0009168	purine ribonucleoside monophosphate biosynthetic process	TraesCS7D02G101300	1
BP	GO:0009145	purine nucleoside triphosphate biosynthetic process	TraesCS7D02G101300	1
BP	GO:0009206	purine ribonucleoside triphosphate biosynthetic process	TraesCS7D02G101300	1
BP	GO:0072524	pyridine-containing compound metabolic process	TraesCS7D02G101300	1
BP	GO:0046434	organophosphate catabolic process	TraesCS7D02G101300	1
BP	GO:0009201	ribonucleoside triphosphate biosynthetic process	TraesCS7D02G101300	1
BP	GO:0009156	ribonucleoside monophosphate biosynthetic process	TraesCS7D02G101300	1
BP	GO:0034404	nucleobase-containing small molecule biosynthetic process	TraesCS7D02G101300	1
BP	GO:0009142	nucleoside triphosphate biosynthetic process	TraesCS7D02G101300	1
BP	GO:0009124	nucleoside monophosphate biosynthetic process	TraesCS7D02G101300	1
BP	GO:0046034	ATP metabolic process	TraesCS7D02G101300	1
BP	GO:0009126	purine nucleoside monophosphate metabolic process	TraesCS7D02G101300	1
BP	GO:0009167	purine ribonucleoside monophosphate metabolic process	TraesCS7D02G101300	1
BP	GO:0009144	purine nucleoside triphosphate metabolic process	TraesCS7D02G101300	1
BP	GO:0009205	purine ribonucleoside triphosphate metabolic process	TraesCS7D02G101300	1
BP	GO:0006164	purine nucleotide biosynthetic process	TraesCS7D02G101300	1
BP	GO:0009152	purine ribonucleotide biosynthetic process	TraesCS7D02G101300	1
BP	GO:0009199	ribonucleoside triphosphate metabolic process	TraesCS7D02G101300	1
BP	GO:0009161	ribonucleoside monophosphate metabolic process	TraesCS7D02G101300	1
BP	GO:0072522	purine-containing compound biosynthetic process	TraesCS7D02G101300	1
BP	GO:0009260	ribonucleotide biosynthetic process	TraesCS7D02G101300	1
BP	GO:0046390	ribose phosphate biosynthetic process	TraesCS7D02G101300	1
BP	GO:0009141	nucleoside triphosphate metabolic process	TraesCS7D02G101300	1
BP	GO:0009123	nucleoside monophosphate metabolic process	TraesCS7D02G101300	1
BP	GO:0071569	protein ufmylation	TraesCS7D02G101500	1
BP	GO:0032049	cardiolipin biosynthetic process	TraesCS7D02G101700	1
BP	GO:0032048	cardiolipin metabolic process	TraesCS7D02G101700	1
BP	GO:0035773	insulin secretion involved in cellular response to glucose stimulus	TraesCS7D02G101700	1
BP	GO:0061178	regulation of insulin secretion involved in cellular response to glucose stimulus	TraesCS7D02G101700	1
BP	GO:0006655	phosphatidylglycerol biosynthetic process	TraesCS7D02G101700	1
BP	GO:0046676	negative regulation of insulin secretion	TraesCS7D02G101700	1
BP	GO:0046888	negative regulation of hormone secretion	TraesCS7D02G101700	1
BP	GO:0090278	negative regulation of peptide hormone secretion	TraesCS7D02G101700	1
BP	GO:0046471	phosphatidylglycerol metabolic process	TraesCS7D02G101700	1
BP	GO:0002792	negative regulation of peptide secretion	TraesCS7D02G101700	1
BP	GO:0050709	negative regulation of protein secretion	TraesCS7D02G101700	1
BP	GO:0051048	negative regulation of secretion	TraesCS7D02G101700	1
BP	GO:1903531	negative regulation of secretion by cell	TraesCS7D02G101700	1
BP	GO:0030073	insulin secretion	TraesCS7D02G101700	1
BP	GO:0050796	regulation of insulin secretion	TraesCS7D02G101700	1
BP	GO:0030072	peptide hormone secretion	TraesCS7D02G101700	1
BP	GO:0046879	hormone secretion	TraesCS7D02G101700	1
BP	GO:0046883	regulation of hormone secretion	TraesCS7D02G101700	1
BP	GO:0090276	regulation of peptide hormone secretion	TraesCS7D02G101700	1
BP	GO:0071333	cellular response to glucose stimulus	TraesCS7D02G101700	1
BP	GO:0071326	cellular response to monosaccharide stimulus	TraesCS7D02G101700	1
BP	GO:0071331	cellular response to hexose stimulus	TraesCS7D02G101700	1
BP	GO:0023061	signal release	TraesCS7D02G101700	1
BP	GO:0001678	cellular glucose homeostasis	TraesCS7D02G101700	1
BP	GO:0050708	regulation of protein secretion	TraesCS7D02G101700	1
BP	GO:0002791	regulation of peptide secretion	TraesCS7D02G101700	1
BP	GO:0042593	glucose homeostasis	TraesCS7D02G101700	1
BP	GO:0033500	carbohydrate homeostasis	TraesCS7D02G101700	1
BP	GO:0046474	glycerophospholipid biosynthetic process	TraesCS7D02G101700	1
BP	GO:0051046	regulation of secretion	TraesCS7D02G101700	1
BP	GO:1903530	regulation of secretion by cell	TraesCS7D02G101700	1
BP	GO:0009306	protein secretion	TraesCS7D02G101700	1
BP	GO:0035592	establishment of protein localization to extracellular region	TraesCS7D02G101700	1
BP	GO:0071692	protein localization to extracellular region	TraesCS7D02G101700	1
BP	GO:0002790	peptide secretion	TraesCS7D02G101700	1
BP	GO:0009749	response to glucose	TraesCS7D02G101700	1
BP	GO:0009746	response to hexose	TraesCS7D02G101700	1
BP	GO:0034284	response to monosaccharide	TraesCS7D02G101700	1
BP	GO:0006650	glycerophospholipid metabolic process	TraesCS7D02G101700	1
BP	GO:0008654	phospholipid biosynthetic process	TraesCS7D02G101700	1
BP	GO:0071322	cellular response to carbohydrate stimulus	TraesCS7D02G101700	1
BP	GO:0032940	secretion by cell	TraesCS7D02G101700	1
BP	GO:0009914	hormone transport	TraesCS7D02G101700/TraesCS7D02G106000/TraesCS7D02G106400	3
BP	GO:0051224	negative regulation of protein transport	TraesCS7D02G101700/TraesCS7D02G107300	2
BP	GO:1904950	negative regulation of establishment of protein localization	TraesCS7D02G101700/TraesCS7D02G107300	2
BP	GO:0051051	negative regulation of transport	TraesCS7D02G101700/TraesCS7D02G107300	2
BP	GO:0007267	cell-cell signaling	TraesCS7D02G101700/TraesCS7D02G107300	2
BP	GO:0051223	regulation of protein transport	TraesCS7D02G101700/TraesCS7D02G107300	2
BP	GO:0070201	regulation of establishment of protein localization	TraesCS7D02G101700/TraesCS7D02G107300	2
BP	GO:0090087	regulation of peptide transport	TraesCS7D02G101700/TraesCS7D02G107300	2
BP	GO:0032880	regulation of protein localization	TraesCS7D02G101700/TraesCS7D02G107300	2
BP	GO:0060341	regulation of cellular localization	TraesCS7D02G101700/TraesCS7D02G107300	2
BP	GO:0045017	glycerolipid biosynthetic process	TraesCS7D02G101700/TraesCS7D02G111200	2
BP	GO:0007097	nuclear migration	TraesCS7D02G101800	1
BP	GO:0051647	nucleus localization	TraesCS7D02G101800	1
BP	GO:0032507	maintenance of protein location in cell	TraesCS7D02G101800	1
BP	GO:0045185	maintenance of protein location	TraesCS7D02G101800	1
BP	GO:0007186	G protein-coupled receptor signaling pathway	TraesCS7D02G101800	1
BP	GO:0030837	negative regulation of actin filament polymerization	TraesCS7D02G101800	1
BP	GO:0032272	negative regulation of protein polymerization	TraesCS7D02G101800	1
BP	GO:0051651	maintenance of location in cell	TraesCS7D02G101800	1
BP	GO:0031333	negative regulation of protein-containing complex assembly	TraesCS7D02G101800	1
BP	GO:1902904	negative regulation of supramolecular fiber organization	TraesCS7D02G101800	1
BP	GO:0051494	negative regulation of cytoskeleton organization	TraesCS7D02G101800	1
BP	GO:0051235	maintenance of location	TraesCS7D02G101800	1
BP	GO:0030833	regulation of actin filament polymerization	TraesCS7D02G101800	1
BP	GO:0030041	actin filament polymerization	TraesCS7D02G101800	1
BP	GO:0008064	regulation of actin polymerization or depolymerization	TraesCS7D02G101800	1
BP	GO:0030832	regulation of actin filament length	TraesCS7D02G101800	1
BP	GO:0032271	regulation of protein polymerization	TraesCS7D02G101800	1
BP	GO:0110053	regulation of actin filament organization	TraesCS7D02G101800	1
BP	GO:0008154	actin polymerization or depolymerization	TraesCS7D02G101800	1
BP	GO:0032956	regulation of actin cytoskeleton organization	TraesCS7D02G101800	1
BP	GO:0032970	regulation of actin filament-based process	TraesCS7D02G101800	1
BP	GO:1902903	regulation of supramolecular fiber organization	TraesCS7D02G101800	1
BP	GO:0007015	actin filament organization	TraesCS7D02G101800	1
BP	GO:0051258	protein polymerization	TraesCS7D02G101800	1
BP	GO:0051493	regulation of cytoskeleton organization	TraesCS7D02G101800	1
BP	GO:0043254	regulation of protein-containing complex assembly	TraesCS7D02G101800	1
BP	GO:0051656	establishment of organelle localization	TraesCS7D02G101800	1
BP	GO:0009860	pollen tube growth	TraesCS7D02G101800	1
BP	GO:0032535	regulation of cellular component size	TraesCS7D02G101800	1
BP	GO:0030036	actin cytoskeleton organization	TraesCS7D02G101800	1
BP	GO:0090066	regulation of anatomical structure size	TraesCS7D02G101800	1
BP	GO:0030029	actin filament-based process	TraesCS7D02G101800	1
BP	GO:0010639	negative regulation of organelle organization	TraesCS7D02G101800/TraesCS7D02G107300	2
BP	GO:0010025	wax biosynthetic process	TraesCS7D02G102000/TraesCS7D02G102100/TraesCS7D02G102300/TraesCS7D02G102400/TraesCS7D02G102800/TraesCS7D02G102900/TraesCS7D02G111200	7
BP	GO:0010166	wax metabolic process	TraesCS7D02G102000/TraesCS7D02G102100/TraesCS7D02G102300/TraesCS7D02G102400/TraesCS7D02G102800/TraesCS7D02G102900/TraesCS7D02G111200	7
BP	GO:1901570	fatty acid derivative biosynthetic process	TraesCS7D02G102000/TraesCS7D02G102100/TraesCS7D02G102300/TraesCS7D02G102400/TraesCS7D02G102800/TraesCS7D02G102900/TraesCS7D02G111200	7
BP	GO:1901568	fatty acid derivative metabolic process	TraesCS7D02G102000/TraesCS7D02G102100/TraesCS7D02G102300/TraesCS7D02G102400/TraesCS7D02G102800/TraesCS7D02G102900/TraesCS7D02G111200	7
BP	GO:0042761	very long-chain fatty acid biosynthetic process	TraesCS7D02G102100	1
BP	GO:0000038	very long-chain fatty acid metabolic process	TraesCS7D02G102100	1
BP	GO:0010345	suberin biosynthetic process	TraesCS7D02G102100	1
BP	GO:0006633	fatty acid biosynthetic process	TraesCS7D02G102100	1
BP	GO:0010951	negative regulation of endopeptidase activity	TraesCS7D02G103400/TraesCS7D02G107300	2
BP	GO:0010466	negative regulation of peptidase activity	TraesCS7D02G103400/TraesCS7D02G107300	2
BP	GO:0052548	regulation of endopeptidase activity	TraesCS7D02G103400/TraesCS7D02G107300	2
BP	GO:0052547	regulation of peptidase activity	TraesCS7D02G103400/TraesCS7D02G107300	2
BP	GO:0045861	negative regulation of proteolysis	TraesCS7D02G103400/TraesCS7D02G107300	2
BP	GO:0051346	negative regulation of hydrolase activity	TraesCS7D02G103400/TraesCS7D02G107300	2
BP	GO:0006743	ubiquinone metabolic process	TraesCS7D02G103700	1
BP	GO:0006744	ubiquinone biosynthetic process	TraesCS7D02G103700	1
BP	GO:1901661	quinone metabolic process	TraesCS7D02G103700	1
BP	GO:1901663	quinone biosynthetic process	TraesCS7D02G103700	1
BP	GO:0042181	ketone biosynthetic process	TraesCS7D02G103700	1
BP	GO:0045815	positive regulation of gene expression,epigenetic	TraesCS7D02G103800	1
BP	GO:0006354	DNA-templated transcription,elongation	TraesCS7D02G103800	1
BP	GO:0006368	transcription elongation from RNA polymerase II promoter	TraesCS7D02G103800	1
BP	GO:0006338	chromatin remodeling	TraesCS7D02G103800	1
BP	GO:0034401	chromatin organization involved in regulation of transcription	TraesCS7D02G103800	1
BP	GO:0015786	UDP-glucose transmembrane transport	TraesCS7D02G105100/TraesCS7D02G105100	2
BP	GO:0090481	pyrimidine nucleotide-sugar transmembrane transport	TraesCS7D02G105100/TraesCS7D02G105100	2
BP	GO:0015780	nucleotide-sugar transmembrane transport	TraesCS7D02G105100/TraesCS7D02G105100	2
BP	GO:1901264	carbohydrate derivative transport	TraesCS7D02G105100/TraesCS7D02G105100	2
BP	GO:0016145	S-glycoside catabolic process	TraesCS7D02G105900	1
BP	GO:0019759	glycosinolate catabolic process	TraesCS7D02G105900	1
BP	GO:0019762	glucosinolate catabolic process	TraesCS7D02G105900	1
BP	GO:0044273	sulfur compound catabolic process	TraesCS7D02G105900	1
BP	GO:1901658	glycosyl compound catabolic process	TraesCS7D02G105900	1
BP	GO:1901136	carbohydrate derivative catabolic process	TraesCS7D02G105900	1
BP	GO:0016143	S-glycoside metabolic process	TraesCS7D02G105900	1
BP	GO:0019757	glycosinolate metabolic process	TraesCS7D02G105900	1
BP	GO:0019760	glucosinolate metabolic process	TraesCS7D02G105900	1
BP	GO:0009934	regulation of meristem structural organization	TraesCS7D02G106000	1
BP	GO:1902584	positive regulation of response to water deprivation	TraesCS7D02G106000	1
BP	GO:0010187	negative regulation of seed germination	TraesCS7D02G106000	1
BP	GO:0042335	cuticle development	TraesCS7D02G106000	1
BP	GO:2000070	regulation of response to water deprivation	TraesCS7D02G106000	1
BP	GO:0009933	meristem structural organization	TraesCS7D02G106000	1
BP	GO:0048532	anatomical structure arrangement	TraesCS7D02G106000	1
BP	GO:0009926	auxin polar transport	TraesCS7D02G106000	1
BP	GO:0010029	regulation of seed germination	TraesCS7D02G106000	1
BP	GO:1900140	regulation of seedling development	TraesCS7D02G106000	1
BP	GO:0060918	auxin transport	TraesCS7D02G106000/TraesCS7D02G106400	2
BP	GO:0009864	induced systemic resistance,jasmonic acid mediated signaling pathway	TraesCS7D02G106400	1
BP	GO:0010120	camalexin biosynthetic process	TraesCS7D02G106400	1
BP	GO:0052317	camalexin metabolic process	TraesCS7D02G106400	1
BP	GO:0009700	indole phytoalexin biosynthetic process	TraesCS7D02G106400	1
BP	GO:0046217	indole phytoalexin metabolic process	TraesCS7D02G106400	1
BP	GO:0052314	phytoalexin metabolic process	TraesCS7D02G106400	1
BP	GO:0052315	phytoalexin biosynthetic process	TraesCS7D02G106400	1
BP	GO:0010183	pollen tube guidance	TraesCS7D02G106400	1
BP	GO:0009403	toxin biosynthetic process	TraesCS7D02G106400	1
BP	GO:0050918	positive chemotaxis	TraesCS7D02G106400	1
BP	GO:0010229	inflorescence development	TraesCS7D02G106400	1
BP	GO:0050826	response to freezing	TraesCS7D02G106400	1
BP	GO:0009682	induced systemic resistance	TraesCS7D02G106400	1
BP	GO:0009404	toxin metabolic process	TraesCS7D02G106400	1
BP	GO:0002218	activation of innate immune response	TraesCS7D02G106400	1
BP	GO:0002253	activation of immune response	TraesCS7D02G106400	1
BP	GO:0045089	positive regulation of innate immune response	TraesCS7D02G106400	1
BP	GO:0042435	indole-containing compound biosynthetic process	TraesCS7D02G106400	1
BP	GO:0048481	plant ovule development	TraesCS7D02G106400	1
BP	GO:0035670	plant-type ovary development	TraesCS7D02G106400	1
BP	GO:0010224	response to UV-B	TraesCS7D02G106400	1
BP	GO:0000165	MAPK cascade	TraesCS7D02G106400	1
BP	GO:0042430	indole-containing compound metabolic process	TraesCS7D02G106400	1
BP	GO:0050778	positive regulation of immune response	TraesCS7D02G106400	1
BP	GO:0009867	jasmonic acid mediated signaling pathway	TraesCS7D02G106400	1
BP	GO:0010051	xylem and phloem pattern formation	TraesCS7D02G106400	1
BP	GO:0048440	carpel development	TraesCS7D02G106400	1
BP	GO:0002684	positive regulation of immune system process	TraesCS7D02G106400	1
BP	GO:0071395	cellular response to jasmonic acid stimulus	TraesCS7D02G106400	1
BP	GO:0048467	gynoecium development	TraesCS7D02G106400	1
BP	GO:0002833	positive regulation of response to biotic stimulus	TraesCS7D02G106400	1
BP	GO:0032103	positive regulation of response to external stimulus	TraesCS7D02G106400	1
BP	GO:0023014	signal transduction by protein phosphorylation	TraesCS7D02G106400	1
BP	GO:0044272	sulfur compound biosynthetic process	TraesCS7D02G106400	1
BP	GO:0031349	positive regulation of defense response	TraesCS7D02G106400	1
BP	GO:0002252	immune effector process	TraesCS7D02G106400	1
BP	GO:0006935	chemotaxis	TraesCS7D02G106400/TraesCS7D02G107300	2
BP	GO:0042330	taxis	TraesCS7D02G106400/TraesCS7D02G107300	2
BP	GO:0040011	locomotion	TraesCS7D02G106400/TraesCS7D02G107300	2
BP	GO:0042542	response to hydrogen peroxide	TraesCS7D02G106400/TraesCS7D02G110600	2
BP	GO:0002067	glandular epithelial cell differentiation	TraesCS7D02G107300	1
BP	GO:0010823	negative regulation of mitochondrion organization	TraesCS7D02G107300	1
BP	GO:0035883	enteroendocrine cell differentiation	TraesCS7D02G107300	1
BP	GO:1903215	negative regulation of protein targeting to mitochondrion	TraesCS7D02G107300	1
BP	GO:1903748	negative regulation of establishment of protein localization to mitochondrion	TraesCS7D02G107300	1
BP	GO:0007465	R7 cell fate commitment	TraesCS7D02G107300	1
BP	GO:0045466	R7 cell differentiation	TraesCS7D02G107300	1
BP	GO:0045676	regulation of R7 cell differentiation	TraesCS7D02G107300	1
BP	GO:0007411	axon guidance	TraesCS7D02G107300	1
BP	GO:0097485	neuron projection guidance	TraesCS7D02G107300	1
BP	GO:0001752	compound eye photoreceptor fate commitment	TraesCS7D02G107300	1
BP	GO:0032387	negative regulation of intracellular transport	TraesCS7D02G107300	1
BP	GO:0042706	eye photoreceptor cell fate commitment	TraesCS7D02G107300	1
BP	GO:0046552	photoreceptor cell fate commitment	TraesCS7D02G107300	1
BP	GO:0048663	neuron fate commitment	TraesCS7D02G107300	1
BP	GO:0090317	negative regulation of intracellular protein transport	TraesCS7D02G107300	1
BP	GO:0002065	columnar/cuboidal epithelial cell differentiation	TraesCS7D02G107300	1
BP	GO:0046532	regulation of photoreceptor cell differentiation	TraesCS7D02G107300	1
BP	GO:0110116	regulation of compound eye photoreceptor cell differentiation	TraesCS7D02G107300	1
BP	GO:0001751	compound eye photoreceptor cell differentiation	TraesCS7D02G107300	1
BP	GO:0001754	eye photoreceptor cell differentiation	TraesCS7D02G107300	1
BP	GO:0040014	regulation of multicellular organism growth	TraesCS7D02G107300	1
BP	GO:0046530	photoreceptor cell differentiation	TraesCS7D02G107300	1
BP	GO:0001745	compound eye morphogenesis	TraesCS7D02G107300	1
BP	GO:0048749	compound eye development	TraesCS7D02G107300	1
BP	GO:0048592	eye morphogenesis	TraesCS7D02G107300	1
BP	GO:0097191	extrinsic apoptotic signaling pathway	TraesCS7D02G107300	1
BP	GO:2001236	regulation of extrinsic apoptotic signaling pathway	TraesCS7D02G107300	1
BP	GO:2001237	negative regulation of extrinsic apoptotic signaling pathway	TraesCS7D02G107300	1
BP	GO:0001654	eye development	TraesCS7D02G107300	1
BP	GO:0030178	negative regulation of Wnt signaling pathway	TraesCS7D02G107300	1
BP	GO:0048880	sensory system development	TraesCS7D02G107300	1
BP	GO:0090090	negative regulation of canonical Wnt signaling pathway	TraesCS7D02G107300	1
BP	GO:0150063	visual system development	TraesCS7D02G107300	1
BP	GO:1903214	regulation of protein targeting to mitochondrion	TraesCS7D02G107300	1
BP	GO:1903747	regulation of establishment of protein localization to mitochondrion	TraesCS7D02G107300	1
BP	GO:0010821	regulation of mitochondrion organization	TraesCS7D02G107300	1
BP	GO:0090596	sensory organ morphogenesis	TraesCS7D02G107300	1
BP	GO:2000027	regulation of animal organ morphogenesis	TraesCS7D02G107300	1
BP	GO:0007409	axonogenesis	TraesCS7D02G107300	1
BP	GO:0016055	Wnt signaling pathway	TraesCS7D02G107300	1
BP	GO:0030111	regulation of Wnt signaling pathway	TraesCS7D02G107300	1
BP	GO:0060070	canonical Wnt signaling pathway	TraesCS7D02G107300	1
BP	GO:0060828	regulation of canonical Wnt signaling pathway	TraesCS7D02G107300	1
BP	GO:0048667	cell morphogenesis involved in neuron differentiation	TraesCS7D02G107300	1
BP	GO:0198738	cell-cell signaling by wnt	TraesCS7D02G107300	1
BP	GO:1903828	negative regulation of cellular protein localization	TraesCS7D02G107300	1
BP	GO:0007423	sensory organ development	TraesCS7D02G107300	1
BP	GO:1905114	cell surface receptor signaling pathway involved in cell-cell signaling	TraesCS7D02G107300	1
BP	GO:0031648	protein destabilization	TraesCS7D02G107300	1
BP	GO:0007141	male meiosis I	TraesCS7D02G107300	1
BP	GO:2001234	negative regulation of apoptotic signaling pathway	TraesCS7D02G107300	1
BP	GO:2001244	positive regulation of intrinsic apoptotic signaling pathway	TraesCS7D02G107300	1
BP	GO:0043154	negative regulation of cysteine-type endopeptidase activity involved in apoptotic process	TraesCS7D02G107300	1
BP	GO:0048812	neuron projection morphogenesis	TraesCS7D02G107300	1
BP	GO:0061564	axon development	TraesCS7D02G107300	1
BP	GO:0048858	cell projection morphogenesis	TraesCS7D02G107300	1
BP	GO:0120039	plasma membrane bounded cell projection morphogenesis	TraesCS7D02G107300	1
BP	GO:2001235	positive regulation of apoptotic signaling pathway	TraesCS7D02G107300	1
BP	GO:0007264	small GTPase mediated signal transduction	TraesCS7D02G107300	1
BP	GO:0035264	multicellular organism growth	TraesCS7D02G107300	1
BP	GO:0043281	regulation of cysteine-type endopeptidase activity involved in apoptotic process	TraesCS7D02G107300	1
BP	GO:0032990	cell part morphogenesis	TraesCS7D02G107300	1
BP	GO:0051402	neuron apoptotic process	TraesCS7D02G107300	1
BP	GO:0070997	neuron death	TraesCS7D02G107300	1
BP	GO:1903533	regulation of protein targeting	TraesCS7D02G107300	1
BP	GO:2001242	regulation of intrinsic apoptotic signaling pathway	TraesCS7D02G107300	1
BP	GO:0045664	regulation of neuron differentiation	TraesCS7D02G107300	1
BP	GO:0030855	epithelial cell differentiation	TraesCS7D02G107300	1
BP	GO:0050767	regulation of neurogenesis	TraesCS7D02G107300	1
BP	GO:2000117	negative regulation of cysteine-type endopeptidase activity	TraesCS7D02G107300	1
BP	GO:0031175	neuron projection development	TraesCS7D02G107300	1
BP	GO:2000116	regulation of cysteine-type endopeptidase activity	TraesCS7D02G107300	1
BP	GO:2001233	regulation of apoptotic signaling pathway	TraesCS7D02G107300	1
BP	GO:0051960	regulation of nervous system development	TraesCS7D02G107300	1
BP	GO:0009887	animal organ morphogenesis	TraesCS7D02G107300	1
BP	GO:0016579	protein deubiquitination	TraesCS7D02G107300	1
BP	GO:0097193	intrinsic apoptotic signaling pathway	TraesCS7D02G107300	1
BP	GO:0007140	male meiotic nuclear division	TraesCS7D02G107300	1
BP	GO:0007283	spermatogenesis	TraesCS7D02G107300	1
BP	GO:0048666	neuron development	TraesCS7D02G107300	1
BP	GO:0031396	regulation of protein ubiquitination	TraesCS7D02G107300	1
BP	GO:0043066	negative regulation of apoptotic process	TraesCS7D02G107300	1
BP	GO:1903320	regulation of protein modification by small protein conjugation or removal	TraesCS7D02G107300	1
BP	GO:0033157	regulation of intracellular protein transport	TraesCS7D02G107300	1
BP	GO:0030182	neuron differentiation	TraesCS7D02G107300	1
BP	GO:0097190	apoptotic signaling pathway	TraesCS7D02G107300	1
BP	GO:0007093	mitotic cell cycle checkpoint	TraesCS7D02G107300	1
BP	GO:0031647	regulation of protein stability	TraesCS7D02G107300	1
BP	GO:0006626	protein targeting to mitochondrion	TraesCS7D02G107300	1
BP	GO:0070585	protein localization to mitochondrion	TraesCS7D02G107300	1
BP	GO:0072655	establishment of protein localization to mitochondrion	TraesCS7D02G107300	1
BP	GO:0048699	generation of neurons	TraesCS7D02G107300	1
BP	GO:0070646	protein modification by small protein removal	TraesCS7D02G107300	1
BP	GO:0032386	regulation of intracellular transport	TraesCS7D02G107300	1
BP	GO:0022008	neurogenesis	TraesCS7D02G107300	1
BP	GO:0060284	regulation of cell development	TraesCS7D02G107300	1
BP	GO:0060429	epithelium development	TraesCS7D02G107300	1
BP	GO:1903827	regulation of cellular protein localization	TraesCS7D02G107300	1
BP	GO:0120036	plasma membrane bounded cell projection organization	TraesCS7D02G107300	1
BP	GO:0045165	cell fate commitment	TraesCS7D02G107300	1
BP	GO:0000075	cell cycle checkpoint	TraesCS7D02G107300	1
BP	GO:0030030	cell projection organization	TraesCS7D02G107300	1
BP	GO:0045930	negative regulation of mitotic cell cycle	TraesCS7D02G107300	1
BP	GO:0043069	negative regulation of programmed cell death	TraesCS7D02G107300	1
BP	GO:0000209	protein polyubiquitination	TraesCS7D02G107300	1
BP	GO:0060548	negative regulation of cell death	TraesCS7D02G107300	1
BP	GO:0007399	nervous system development	TraesCS7D02G107300	1
BP	GO:0048232	male gamete generation	TraesCS7D02G107300	1
BP	GO:0006839	mitochondrial transport	TraesCS7D02G107300	1
BP	GO:0022412	cellular process involved in reproduction in multicellular organism	TraesCS7D02G107300	1
BP	GO:0007127	meiosis I	TraesCS7D02G107300	1
BP	GO:0061982	meiosis I cell cycle process	TraesCS7D02G107300	1
BP	GO:0010366	negative regulation of ethylene biosynthetic process	TraesCS7D02G110400/TraesCS7D02G110400	2
BP	GO:0031336	negative regulation of sulfur amino acid metabolic process	TraesCS7D02G110400/TraesCS7D02G110400	2
BP	GO:0051175	negative regulation of sulfur metabolic process	TraesCS7D02G110400/TraesCS7D02G110400	2
BP	GO:1900909	negative regulation of olefin metabolic process	TraesCS7D02G110400/TraesCS7D02G110400	2
BP	GO:1900912	negative regulation of olefin biosynthetic process	TraesCS7D02G110400/TraesCS7D02G110400	2
BP	GO:0015012	heparan sulfate proteoglycan biosynthetic process	TraesCS7D02G110400/TraesCS7D02G110400	2
BP	GO:0030201	heparan sulfate proteoglycan metabolic process	TraesCS7D02G110400/TraesCS7D02G110400	2
BP	GO:0033239	negative regulation of cellular amine metabolic process	TraesCS7D02G110400/TraesCS7D02G110400	2
BP	GO:0045763	negative regulation of cellular amino acid metabolic process	TraesCS7D02G110400/TraesCS7D02G110400	2
BP	GO:0030166	proteoglycan biosynthetic process	TraesCS7D02G110400/TraesCS7D02G110400	2
BP	GO:0032351	negative regulation of hormone metabolic process	TraesCS7D02G110400/TraesCS7D02G110400	2
BP	GO:0032353	negative regulation of hormone biosynthetic process	TraesCS7D02G110400/TraesCS7D02G110400	2
BP	GO:0055070	copper ion homeostasis	TraesCS7D02G110400/TraesCS7D02G110400	2
BP	GO:0010364	regulation of ethylene biosynthetic process	TraesCS7D02G110400/TraesCS7D02G110400	2
BP	GO:0031335	regulation of sulfur amino acid metabolic process	TraesCS7D02G110400/TraesCS7D02G110400	2
BP	GO:1900908	regulation of olefin metabolic process	TraesCS7D02G110400/TraesCS7D02G110400	2
BP	GO:1900911	regulation of olefin biosynthetic process	TraesCS7D02G110400/TraesCS7D02G110400	2
BP	GO:0010082	regulation of root meristem growth	TraesCS7D02G110400/TraesCS7D02G110400	2
BP	GO:0006029	proteoglycan metabolic process	TraesCS7D02G110400/TraesCS7D02G110400	2
BP	GO:0062014	negative regulation of small molecule metabolic process	TraesCS7D02G110400/TraesCS7D02G110400	2
BP	GO:0042762	regulation of sulfur metabolic process	TraesCS7D02G110400/TraesCS7D02G110400	2
BP	GO:0006521	regulation of cellular amino acid metabolic process	TraesCS7D02G110400/TraesCS7D02G110400	2
BP	GO:0033238	regulation of cellular amine metabolic process	TraesCS7D02G110400/TraesCS7D02G110400	2
BP	GO:0010449	root meristem growth	TraesCS7D02G110400/TraesCS7D02G110400	2
BP	GO:0009692	ethylene metabolic process	TraesCS7D02G110400/TraesCS7D02G110400	2
BP	GO:0009693	ethylene biosynthetic process	TraesCS7D02G110400/TraesCS7D02G110400	2
BP	GO:0043449	cellular alkene metabolic process	TraesCS7D02G110400/TraesCS7D02G110400	2
BP	GO:0043450	alkene biosynthetic process	TraesCS7D02G110400/TraesCS7D02G110400	2
BP	GO:1900674	olefin biosynthetic process	TraesCS7D02G110400/TraesCS7D02G110400	2
BP	GO:1900673	olefin metabolic process	TraesCS7D02G110400/TraesCS7D02G110400	2
BP	GO:0010075	regulation of meristem growth	TraesCS7D02G110400/TraesCS7D02G110400	2
BP	GO:0046885	regulation of hormone biosynthetic process	TraesCS7D02G110400/TraesCS7D02G110400	2
BP	GO:0035266	meristem growth	TraesCS7D02G110400/TraesCS7D02G110400	2
BP	GO:0000096	sulfur amino acid metabolic process	TraesCS7D02G110400/TraesCS7D02G110400	2
BP	GO:0032350	regulation of hormone metabolic process	TraesCS7D02G110400/TraesCS7D02G110400	2
BP	GO:0019827	stem cell population maintenance	TraesCS7D02G110400/TraesCS7D02G110400	2
BP	GO:0098727	maintenance of cell number	TraesCS7D02G110400/TraesCS7D02G110400	2
BP	GO:0044106	cellular amine metabolic process	TraesCS7D02G110400/TraesCS7D02G110400	2
BP	GO:0010565	regulation of cellular ketone metabolic process	TraesCS7D02G110400/TraesCS7D02G110400	2
BP	GO:0009101	glycoprotein biosynthetic process	TraesCS7D02G110400/TraesCS7D02G110400	2
BP	GO:0009308	amine metabolic process	TraesCS7D02G110400/TraesCS7D02G110400	2
BP	GO:0062012	regulation of small molecule metabolic process	TraesCS7D02G110400/TraesCS7D02G110400	2
BP	GO:0055076	transition metal ion homeostasis	TraesCS7D02G110400/TraesCS7D02G110400	2
BP	GO:2000280	regulation of root development	TraesCS7D02G110400/TraesCS7D02G110400	2
BP	GO:0009100	glycoprotein metabolic process	TraesCS7D02G110400/TraesCS7D02G110400	2
BP	GO:0009816	defense response to bacterium,incompatible interaction	TraesCS7D02G110600	1
BP	GO:0010193	response to ozone	TraesCS7D02G110600	1
BP	GO:0010200	response to chitin	TraesCS7D02G110600	1
BP	GO:0006783	heme biosynthetic process	TraesCS7D02G110900	1
BP	GO:0042168	heme metabolic process	TraesCS7D02G110900	1
BP	GO:0006779	porphyrin-containing compound biosynthetic process	TraesCS7D02G110900	1
BP	GO:0033014	tetrapyrrole biosynthetic process	TraesCS7D02G110900	1
BP	GO:0045333	cellular respiration	TraesCS7D02G110900	1
BP	GO:0006778	porphyrin-containing compound metabolic process	TraesCS7D02G110900	1
BP	GO:0033013	tetrapyrrole metabolic process	TraesCS7D02G110900	1
BP	GO:0015980	energy derivation by oxidation of organic compounds	TraesCS7D02G110900	1
BP	GO:0019432	triglyceride biosynthetic process	TraesCS7D02G111200	1
BP	GO:0046460	neutral lipid biosynthetic process	TraesCS7D02G111200	1
BP	GO:0046463	acylglycerol biosynthetic process	TraesCS7D02G111200	1
BP	GO:0006641	triglyceride metabolic process	TraesCS7D02G111200	1
BP	GO:0006638	neutral lipid metabolic process	TraesCS7D02G111200	1
BP	GO:0006639	acylglycerol metabolic process	TraesCS7D02G111200	1
BP	GO:0010019	chloroplast-nucleus signaling pathway	TraesCS7D02G111500	1
CC	GO:0016235	aggresome	TraesCS7D02G100100	1
CC	GO:0001650	fibrillar center	TraesCS7D02G100100	1
CC	GO:0016234	inclusion body	TraesCS7D02G100100	1
CC	GO:0031305	integral component of mitochondrial inner membrane	TraesCS7D02G101700	1
CC	GO:0031304	intrinsic component of mitochondrial inner membrane	TraesCS7D02G101700	1
CC	GO:0032592	integral component of mitochondrial membrane	TraesCS7D02G101700	1
CC	GO:0098573	intrinsic component of mitochondrial membrane	TraesCS7D02G101700	1
CC	GO:0031301	integral component of organelle membrane	TraesCS7D02G101700	1
CC	GO:0031300	intrinsic component of organelle membrane	TraesCS7D02G101700	1
CC	GO:0015629	actin cytoskeleton	TraesCS7D02G101800	1
CC	GO:0005615	extracellular space	TraesCS7D02G103400	1
CC	GO:0008023	transcription elongation factor complex	TraesCS7D02G103800	1
CC	GO:0005793	endoplasmic reticulum-Golgi intermediate compartment	TraesCS7D02G105100/TraesCS7D02G105100	2
CC	GO:0019774	proteasome core complex,beta-subunit complex	TraesCS7D02G105500	1
CC	GO:0005839	proteasome core complex	TraesCS7D02G105500	1
CC	GO:0000502	proteasome complex	TraesCS7D02G105500	1
CC	GO:1905369	endopeptidase complex	TraesCS7D02G105500	1
CC	GO:1905368	peptidase complex	TraesCS7D02G105500	1
CC	GO:0019005	SCF ubiquitin ligase complex	TraesCS7D02G106000/TraesCS7D02G107300	2
CC	GO:0009574	preprophase band	TraesCS7D02G106400	1
CC	GO:0009524	phragmoplast	TraesCS7D02G106400	1
CC	GO:0030877	beta-catenin destruction complex	TraesCS7D02G107300	1
CC	GO:0043025	neuronal cell body	TraesCS7D02G107300	1
CC	GO:0044297	cell body	TraesCS7D02G107300	1
CC	GO:0036477	somatodendritic compartment	TraesCS7D02G107300	1
CC	GO:0043005	neuron projection	TraesCS7D02G107300	1
CC	GO:0005769	early endosome	TraesCS7D02G107300	1
CC	GO:0005874	microtubule	TraesCS7D02G107600/TraesCS7D02G107600	2
MF	GO:0070628	proteasome binding	TraesCS7D02G100100	1
MF	GO:0005432	calcium:sodium antiporter activity	TraesCS7D02G100200	1
MF	GO:0015368	calcium:cation antiporter activity	TraesCS7D02G100200	1
MF	GO:0015491	cation:cation antiporter activity	TraesCS7D02G100200	1
MF	GO:0015081	sodium ion transmembrane transporter activity	TraesCS7D02G100200	1
MF	GO:0015298	solute:cation antiporter activity	TraesCS7D02G100200	1
MF	GO:0015297	antiporter activity	TraesCS7D02G100200	1
MF	GO:0015085	calcium ion transmembrane transporter activity	TraesCS7D02G100200	1
MF	GO:0072509	divalent inorganic cation transmembrane transporter activity	TraesCS7D02G100200	1
MF	GO:0005509	calcium ion binding	TraesCS7D02G100200	1
MF	GO:0033809	anthocyanin 6''-O-malonyltransferase activity	TraesCS7D02G100600	1
MF	GO:0003872	6-phosphofructokinase activity	TraesCS7D02G101300	1
MF	GO:0008443	phosphofructokinase activity	TraesCS7D02G101300	1
MF	GO:0019200	carbohydrate kinase activity	TraesCS7D02G101300	1
MF	GO:0016877	ligase activity,forming carbon-sulfur bonds	TraesCS7D02G101500	1
MF	GO:0008641	ubiquitin-like modifier activating enzyme activity	TraesCS7D02G101500	1
MF	GO:0004439	phosphatidylinositol-4,5-bisphosphate 5-phosphatase activity	TraesCS7D02G101700	1
MF	GO:0106019	phosphatidylinositol-4,5-bisphosphate phosphatase activity	TraesCS7D02G101700	1
MF	GO:0034595	phosphatidylinositol phosphate 5-phosphatase activity	TraesCS7D02G101700	1
MF	GO:0034593	phosphatidylinositol bisphosphate phosphatase activity	TraesCS7D02G101700	1
MF	GO:0052866	phosphatidylinositol phosphate phosphatase activity	TraesCS7D02G101700	1
MF	GO:0005546	phosphatidylinositol-4,5-bisphosphate binding	TraesCS7D02G101800	1
MF	GO:0070064	proline-rich region binding	TraesCS7D02G101800	1
MF	GO:0003785	actin monomer binding	TraesCS7D02G101800	1
MF	GO:1902936	phosphatidylinositol bisphosphate binding	TraesCS7D02G101800	1
MF	GO:1901981	phosphatidylinositol phosphate binding	TraesCS7D02G101800	1
MF	GO:0003779	actin binding	TraesCS7D02G101800	1
MF	GO:0035091	phosphatidylinositol binding	TraesCS7D02G101800	1
MF	GO:0005543	phospholipid binding	TraesCS7D02G101800	1
MF	GO:0009922	fatty acid elongase activity	TraesCS7D02G102000/TraesCS7D02G102300/TraesCS7D02G102400/TraesCS7D02G102800/TraesCS7D02G102900	5
MF	GO:0004312	fatty acid synthase activity	TraesCS7D02G102000/TraesCS7D02G102300/TraesCS7D02G102400/TraesCS7D02G102800/TraesCS7D02G102900	5
MF	GO:0016713	oxidoreductase activity,acting on paired donors,reduced iron-sulfur protein as one donor and incorporation of one atom of oxygen	TraesCS7D02G102100	1
MF	GO:0080133	midchain alkane hydroxylase activity	TraesCS7D02G102100	1
MF	GO:0004867	serine-type endopeptidase inhibitor activity	TraesCS7D02G103400	1
MF	GO:0004866	endopeptidase inhibitor activity	TraesCS7D02G103400	1
MF	GO:0030414	peptidase inhibitor activity	TraesCS7D02G103400	1
MF	GO:0061135	endopeptidase regulator activity	TraesCS7D02G103400	1
MF	GO:0061134	peptidase regulator activity	TraesCS7D02G103400	1
MF	GO:0004857	enzyme inhibitor activity	TraesCS7D02G103400	1
MF	GO:0000993	RNA polymerase II complex binding	TraesCS7D02G103800	1
MF	GO:0043175	RNA polymerase core enzyme binding	TraesCS7D02G103800	1
MF	GO:0001098	basal transcription machinery binding	TraesCS7D02G103800	1
MF	GO:0001099	basal RNA polymerase II transcription machinery binding	TraesCS7D02G103800	1
MF	GO:0070063	RNA polymerase binding	TraesCS7D02G103800	1
MF	GO:0018708	thiol S-methyltransferase activity	TraesCS7D02G105900	1
MF	GO:0008172	S-methyltransferase activity	TraesCS7D02G105900	1
MF	GO:0004707	MAP kinase activity	TraesCS7D02G106400	1
MF	GO:0097718	disordered domain specific binding	TraesCS7D02G107300	1
MF	GO:0008022	protein C-terminus binding	TraesCS7D02G107300	1
MF	GO:0003714	transcription corepressor activity	TraesCS7D02G107300	1
MF	GO:0031624	ubiquitin conjugating enzyme binding	TraesCS7D02G107300	1
MF	GO:0044390	ubiquitin-like protein conjugating enzyme binding	TraesCS7D02G107300	1
MF	GO:0019904	protein domain specific binding	TraesCS7D02G107300	1
MF	GO:0043621	protein self-association	TraesCS7D02G107300	1
MF	GO:0003712	transcription coregulator activity	TraesCS7D02G107300	1
MF	GO:0008017	microtubule binding	TraesCS7D02G107600/TraesCS7D02G107600	2
MF	GO:0015631	tubulin binding	TraesCS7D02G107600/TraesCS7D02G107600	2
MF	GO:0016782	transferase activity,transferring sulfur-containing groups	TraesCS7D02G110400/TraesCS7D02G110400	2
MF	GO:0008146	sulfotransferase activity	TraesCS7D02G110400/TraesCS7D02G110400	2
MF	GO:0016765	transferase activity,transferring alkyl or aryl (other than methyl) groups	TraesCS7D02G110900	1
MF	GO:0004311	farnesyltranstransferase activity	TraesCS7D02G110900	1
MF	GO:0004659	prenyltransferase activity	TraesCS7D02G110900	1
MF	GO:0047196	long-chain-alcohol O-fatty-acyltransferase activity	TraesCS7D02G111200	1
MF	GO:0004144	diacylglycerol O-acyltransferase activity	TraesCS7D02G111200	1
MF	GO:0016411	acylglycerol O-acyltransferase activity	TraesCS7D02G111200	1
MF	GO:0008374	O-acyltransferase activity	TraesCS7D02G111200	1
MF	GO:0016636	oxidoreductase activity,acting on the CH-CH group of donors, iron-sulfur protein as acceptor	TraesCS7D02G111500	1
MF	GO:0016627	oxidoreductase activity,acting on the CH-CH group of donors	TraesCS7D02G111500	1

## Sheet: Appendix G
Appendix G: Cadmium content (mg kg-1) in 127 diverse spring wheat lines grown in 17SS
Lines	Cadmium
H0800080	0.13
H0800103L	0.087
HR07005-3	0.064
HR07024-5	0.066
HW080169	0.062
HW090006M	0.066
HW090071M	0.051
KELSE	0.064
MACON	0.069
TARA2002	0.079
WA8133	0.063
LOUISE	0.075
PEWAWA	0.064
JUBILEE	0.044
UI_PETTIT	0.077
IDO629	0.068
IDO851	0.076
ALTURAS	0.065
LOLO	0.073
UI_LOCHSA	0.07
IDO686	0.074
IDO377S	0.078
POMERELLE	0.066
IDO696	0.079
IDO854	0.055
IDO858	0.064
IDO687	0.07
IDO582	0.061
WHITEBIRD	0.044
CENTENNIAL	0.054
HAHN-1RS	0.063
HAHN-1RSMA	0.074
ATTILA-1RS	0.094
PI610750	0.076
LASSIK	0.067
UC1682	0.061
SUMMIT_515	0.059
EXPRESSO	0.07
UC896_5+10_LR34_YR18_YR5_GPC	0.058
UC1603	0.05
BLANCA_FUERTE	0.061
UC1395_LR34_YR18	0.043
UC1396_LR34_YR18	0.058
UC1551	0.068
UC1552	0.066
UC1599	0.054
UC1616	0.043
UC1618	0.059
UC1642	0.045
UC1643	0.061
10010-20	0.052
10013-1	0.037
UC1683	0.055
RIL203	0.043
RIL29	0.056
FORTU	0.065
MCNEAL	0.075
CHOTEAU	0.061
MT0802	0.073
DUCLAIR	0.075
MT1002	0.051
MT1020	0.069
MT1027	0.054
MT1053	0.059
MTHW1060	0.063
MTHW1069	0.061
MT0861	0.068
MT0921	0.071
MT0945	0.052
CAP151-3	0.054
CAP34-1	0.066
MTHW0771	0.066
MT0415	0.075
MT0813	0.043
MTHW0867	0.045
NEWA	0.061
HI-LINE	0.064
9263	0.056
9223	0.051
9225	0.05
9229	0.075
9232	0.057
9233	0.044
9245	0.058
9242	0.07
9240	0.074
9241	0.034
9262	0.048
9246	0.057
9254	0.074
9256	0.063
9252	0.056
9248	0.077
9247	0.072
9249	0.066
9261	0.067
BERKUT	0.055
9258	0.055
9259	0.073
9260	0.073
AC_BARRIE	0.057
37004	0.055
37006	0.045
37007	0.064
37009	0.07
37010	0.062
37012	0.066
37013	0.074
37018	0.063
37019	0.07
37020	0.076
37021	0.063
37022	0.066
37024	0.075
37025	0.067
37029	0.062
37030	0.072
37031	0.07
37033	0.071
37041	0.067
37042	0.065
37047	0.064
37053	0.054
37054	0.054
IDO694C	0.062
LCS-Altomo	0.081
LCS-Star	0.08
